# Supplementary material for: Contribution of Intragenic DNA Methylation in Mouse Gametic DNA Methylomes to Establish Oocyte-Specific Heritable Marks
Source: PLoS Genet. 2012 Jan 5;8(1):e1002440. doi: 10.1371/journal.pgen.1002440 (PMC3252278; doi:10.1371/journal.pgen.1002440)
Supplement: Table S1 — Gene transcript profiling for germ cells, blastocysts, and embryonic stem cells by mRNA-seq. (XLSX) [file pgen.1002440.s016.xlsx]

## Sheet: mRNA-seq
Group_ID (internal_ID)	Gene symbol	Definition	RefSeq ID	Chromosome	Start	End	Length (bp)	Strand		Wild-type oocyte				Dnmt3L-/- oocyte				Sperm				ESC
										Tags	PPM	RPKM		Tags	PPM	RPKM		Tags	PPM	RPKM		Tags	PPM	RPKM
16	Limd2	LIM domain-containing protein 2	NM_172397	11	106017570	106021456	2950	+		1063	31.13	10.55		1101	38.05	12.89		6544	303.41	102.85		686	30.99	10.5
17	Serpinf2	alpha-2-antiplasmin precursor	NM_008878	11	75245238	75252977	2179	+		5	0.14	0.06		0	0	0		0	0	0		2	0.09	0.04
18	Sumo2	small ubiquitin-related modifier 2 precursor	NM_133354	11	115384423	115397544	998	+		767	22.46	22.5		527	18.21	18.24		268	12.42	12.44		1800	81.32	81.48
19	Abca8a	ATP-binding cassette sub-family A member 8-A	NM_153145	11	109886948	109952934	5544	+		17	0.49	0.08		0	0	0		69	3.19	0.57		1	0.04	0
20	Wsb1	WD repeat and SOCS box-containing protein 1	NM_019653, NM_001042565	11	79052884	79068197	2490	+		362	10.6	4.25		422	14.58	5.85		703	32.59	13.08		4631	209.24	84.03
21	Ghdc	GH3 domain-containing protein	NM_031871	11	100627646	100632271	2162	+		299	8.75	4.04		428	14.79	6.84		260	12.05	5.57		241	10.88	5.03
22	Sec14l2	SEC14-like protein 2	NM_144520	11	3997043	4018732	2529	+		179	5.24	2.07		130	4.49	1.77		857	39.73	15.7		121	5.46	2.15
23	Krt10	keratin, type I cytoskeletal 10	NM_010660	11	99246569	99250678	2124	+		156	4.56	2.14		133	4.59	2.16		20	0.92	0.43		44	1.98	0.93
24	Ewsr1	RNA-binding protein EWS	NM_007968	11	4969691	4999080	2400	+		952	27.88	11.61		890	30.76	12.81		1684	78.07	32.52		8274	373.84	155.76
25	Pgap3	post-GPI attachment to proteins factor 3	NM_001033537	11	98249986	98261804	2424	+		64	1.87	0.77		55	1.9	0.78		817	37.88	15.62		164	7.4	3.05
26	Igfbp3	insulin-like growth factor-binding protein 3	NM_008343	11	7106096	7113926	2456	+		13	0.38	0.15		24	0.82	0.33		73	3.38	1.37		333	15.04	6.12
27	Evpl	envoplakin	NM_025276	11	116081873	116099405	6398	+		10	0.29	0.04		28	0.96	0.15		28	1.29	0.2		174	7.86	1.22
28	Mycbpap	MYCBP-associated protein	NM_170671	11	94362661	94382816	2944	+		11	0.32	0.1		7	0.24	0.08		872	40.43	13.73		3	0.13	0.04
29	Sparc	SPARC precursor	NM_009242	11	55208003	55233582	2299	+		40	1.17	0.5		30	1.03	0.44		7372	341.8	148.67		12111	547.2	238.01
30	Cyb5d2	neuferricin	NM_001024926	11	72590734	72609341	2393	+		376	11.01	4.6		279	9.64	4.02		98	4.54	1.89		30	1.35	0.56
31	Abca5	ATP-binding cassette sub-family A member 5	NM_147219	11	110130683	110199030	8339	+		156	4.56	0.54		171	5.91	0.7		1195	55.4	6.64		44	1.98	0.23
32	Pdlim4	PDZ and LIM domain protein 4	NM_019417	11	53868434	53882470	1132	+		9	0.26	0.22		18	0.62	0.54		402	18.63	16.45		7	0.31	0.27
33	Polg2	polymerase (DNA directed), gamma 2, accessory	NM_015810	11	106629620	106640756	1380	+		53	1.55	1.12		59	2.03	1.47		75	3.47	2.51		150	6.77	4.9
34	Gm884	hypothetical protein LOC380730	NM_001033434	11	103395891	103476053	4576	+		3	0.08	0.01		0	0	0		53	2.45	0.53		2	0.09	0.01
35	Akap1	A-kinase anchor protein 1, mitochondrial	NM_009648, NM_001042541	11	88692106	88725900	3758	+		17223	504.46	134.23		14995	518.27	137.91		7756	359.6	95.68		4593	207.52	55.22
36	Rab40b	ras-related protein Rab-40B	NM_139147	11	121217439	121249559	1871	+		15	0.43	0.22		29	1	0.53		32	1.48	0.79		11	0.49	0.26
37	6330403K07Rik	hypothetical protein LOC103712	NM_134022	11	70845443	70847119	1626	+		0	0	0		0	0	0		9	0.41	0.25		32	1.44	0.88
38	Ehbp1	EH domain-binding protein 1	NM_153078	11	21905831	22185841	4821	+		2939	86.08	17.85		1985	68.6	14.22		435	20.16	4.18		543	24.53	5.08
39	Gabra6	gamma-aminobutyric acid receptor subunit alpha-6	NM_001099641, NM_008068	11	42119939	42134553	2484	+		0	0	0		0	0	0		0	0	0		0	0	0
40	Becn1	beclin-1	NM_019584	11	101149581	101163581	2031	+		1964	57.52	28.32		1670	57.72	28.41		1657	76.82	37.82		1909	86.25	42.46
41	Erlec1	endoplasmic reticulum lectin 1	NM_025745	11	30829784	30854131	3501	+		328	9.6	2.74		359	12.4	3.54		1009	46.78	13.36		280	12.65	3.61
42	Vps53	vacuolar protein sorting-associated protein 53	NM_026664	11	75859728	75993132	2816	+		1888	55.29	19.63		1666	57.58	20.44		829	38.43	13.64		835	37.72	13.39
43	Nlgn2	neuroligin-2 precursor	NM_198862	11	69636625	69648351	5034	+		14	0.41	0.08		15	0.51	0.1		155	7.18	1.42		631	28.51	5.66
44	Tom1l2	TOM1-like protein 2 isoform b	NM_153080, NM_001039092, NM_001039093	11	60040216	60166407	8475	+		5872	171.99	20.29		7181	248.19	29.28		715	33.15	3.91		245	11.06	1.3
45	Pex12	peroxisome assembly protein 12	NM_134025	11	83108147	83112479	2726	+		1590	46.57	17.08		1567	54.16	19.86		244	11.31	4.14		268	12.1	4.43
46	Spnb2	spectrin beta chain, brain 1 isoform 2	NM_009260, NM_175836	11	29999395	30119772	9049	+		6143	179.92	19.88		4338	149.93	16.56		3166	146.79	16.22		6723	303.76	33.56
47	Ublcp1	ubiquitin-like domain-containing CTD phosphatase	NM_024475	11	44268077	44280515	2051	+		789	23.11	11.26		748	25.85	12.6		111	5.14	2.5		359	16.22	7.9
48	Hap1	huntingtin-associated protein 1 isoform B	NM_177981, NM_010404	11	100208641	100217401	3651	+		25	0.73	0.19		39	1.34	0.36		249	11.54	3.16		3001	135.59	37.13
49	4933427D14Rik	hypothetical protein LOC74477	NM_028963	11	71967599	72016873	4332	+		231	6.76	1.56		197	6.8	1.56		292	13.53	3.12		249	11.25	2.59
50	Inca1	protein INCA1	NM_213729	11	70501863	70513657	1218	+		102	2.98	2.44		128	4.42	3.62		33	1.53	1.25		13	0.58	0.47
51	Krtap4-8	keratin associated protein 4 family member	NM_001085547	11	99641328	99641957	630	+		0	0	0		0	0	0		0	0	0		0	0	0
52	Rhbdf2	rhomboid family member 2	NM_172572, NM_001167680	11	116459483	116488333	3855	+		3909	114.49	29.69		4299	148.58	38.54		361	16.73	4.33		1037	46.85	12.15
53	Ccr10	C-C chemokine receptor type 10	NM_007721	11	101034312	101036757	1725	+		7	0.2	0.11		8	0.27	0.15		0	0	0		0	0	0
54	Atp1b2	sodium/potassium-transporting ATPase subunit	NM_013415	11	69413252	69419462	2959	+		16	0.46	0.15		9	0.31	0.1		58	2.68	0.9		615	27.78	9.38
55	Dhrs11	dehydrogenase/reductase SDR family member 11	NM_177564	11	84634230	84642488	1403	+		127	3.71	2.64		125	4.32	3.07		125	5.79	4.12		130	5.87	4.18
56	Dppa1	developmental pluripotency associated 1	NM_001163358, NM_178247	11	46421955	46442763	909	+		195	5.71	6.28		170	5.87	6.45		0	0	0		1	0.04	0.04
57	Epn3	epsin-3	NM_027984	11	94352305	94361237	2441	+		14	0.41	0.16		2	0.06	0.02		326	15.11	6.19		0	0	0
58	Olfr318	olfactory receptor 318	NM_146501	11	58533628	58534548	921	+		0	0	0		0	0	0		0	0	0		0	0	0
59	Krt25	keratin, type I cytoskeletal 25	NM_133730	11	99177158	99184255	1665	+		133	3.89	2.33		94	3.24	1.94		0	0	0		0	0	0
60	Krt20	keratin, type I cytoskeletal 20	NM_023256	11	99289717	99299467	1930	+		11	0.32	0.16		42	1.45	0.75		3	0.13	0.06		1	0.04	0.02
61	Olfr331	olfactory receptor 331	NM_001011861	11	58315100	58316056	945	+		0	0	0		0	0	0		0	0	0		0	0	0
62	AU040829	rho GTPase-activating protein RICH2 isoform 1	NM_001099288, NM_175003	11	64815541	64976463	4099	+		1255	36.75	8.96		938	32.42	7.9		633	29.34	7.15		467	21.1	5.14
63	Sfi1	protein SFI1 homolog	NM_030207	11	3031853	3093466	4025	+		746	21.85	5.42		961	33.21	8.25		1637	75.89	18.85		2708	122.35	30.39
64	Ube2z	ubiquitin-conjugating enzyme E2 Z	NM_172300	11	95908750	95926678	3974	+		2202	64.49	16.22		2128	73.55	18.5		2743	127.17	32		6020	272	68.44
65	Slc35e4	solute carrier family 35 member E4	NM_153142	11	3807025	3814667	3059	+		1518	44.46	14.53		1842	63.66	20.81		221	10.24	3.34		96	4.33	1.41
66	Glod4	glyoxalase domain-containing protein 4	NM_026029	11	76035012	76057158	1365	+		512	14.99	10.98		370	12.78	9.36		736	34.12	24.99		1562	70.57	51.69
67		keratin 32	NM_010665	11	99942171	99949429	1590	+		2	0.05	0.03		1	0.03	0.01		234	10.84	6.81		0	0	0
68	A230051G13Rik	putative transferase C1orf69 homolog,	NM_173785	11	58968871	58977244	4024	+		20	0.58	0.14		10	0.34	0.08		133	6.16	1.53		254	11.47	2.85
69	Pold2	DNA polymerase delta subunit 2	NM_008894	11	5772191	5778220	1564	+		1469	43.02	27.5		1314	45.41	29.03		424	19.65	12.56		4898	221.3	141.49
70	Eif4a3	eukaryotic initiation factor 4A-III	NM_138669	11	119149677	119161357	1489	+		5629	164.87	110.72		3921	135.52	91.01		797	36.95	24.81		5545	250.53	168.25
71	Olfr1373	olfactory receptor 1373	NM_207227	11	51958095	51959030	936	+		0	0	0		0	0	0		0	0	0		0	0	0
72	Krt13	keratin, type I cytoskeletal 13	NM_010662	11	99978910	99982809	1314	+		4	0.11	0.08		4	0.13	0.09		0	0	0		3	0.13	0.09
73	Plekhh3	pleckstrin homology domain-containing family H	NM_146030	11	101023993	101032616	3007	+		766	22.43	7.45		805	27.82	9.25		141	6.53	2.17		152	6.86	2.28
74	Slc38a10	putative sodium-coupled neutral amino acid	NM_001164801, NM_001164800, NM_001164802, NM_024249, NM_001164798, NM_001164799	11	119965285	120012588	4495	+		453	13.26	2.94		841	29.06	6.46		2075	96.2	21.4		3741	169.02	37.6
75	Slc22a5	solute carrier family 22 member 5	NM_011396	11	53678044	53705162	3111	+		545	15.96	5.13		445	15.38	4.94		1056	48.96	15.73		119	5.37	1.72
76	Dock2	dedicator of cytokinesis protein 2	NM_033374	11	34126864	34597325	6291	+		272	7.96	1.26		223	7.7	1.22		3199	148.32	23.57		36	1.62	0.25
77	Brca1	breast cancer type 1 susceptibility protein	NM_009764	11	101350078	101413269	6648	+		7873	230.6	34.68		6760	233.64	35.14		211	9.78	1.47		3608	163.01	24.52
78	Hs3st3b1	heparan sulfate glucosamine 3-O-sulfotransferase	NM_018805	11	63698195	63735786	6004	+		22	0.64	0.1		21	0.72	0.11		32	1.48	0.24		142	6.41	1.06
79	Spata20	spermatogenesis-associated protein 20	NM_144827	11	94340218	94346624	2705	+		0	0	0		0	0	0		10259	475.66	175.84		2	0.09	0.03
80	Snx11	sorting nexin 11	NM_028965, NM_001163389	11	96628869	96638845	2552	+		2230	65.31	25.59		2797	96.67	37.88		374	17.34	6.79		539	24.35	9.54
81	Ccl9	C-C motif chemokine 9	NM_011338	11	83386419	83392138	3008	+		0	0	0		0	0	0		2049	95	31.58		4	0.18	0.05
82	Tbc1d16	TBC1 domain family, member 16	NM_172443	11	119008451	119089813	2894	+		0	0	0		1	0.03	0.01		191	8.85	3.05		133	6	2.07
83	Pde6g	retinal rod rhodopsin-sensitive cGMP	NM_012065	11	120308924	120314797	899	+		4	0.11	0.12		1	0.03	0.03		2	0.09	0.1		1	0.04	0.04
84	Spem1	spermatid maturation protein 1	NM_028855	11	69634373	69635667	1060	+		0	0	0		3	0.1	0.09		10842	502.69	474.23		2	0.09	0.08
85	Rph3al	rab effector Noc2	NM_029548	11	75645660	75724528	931	+		6906	202.27	217.26		7328	253.27	272.04		25	1.15	1.23		29	1.31	1.4
86	Sun3	SUN domain-containing protein 3	NM_177576	11	8916057	8948994	1205	+		26	0.76	0.63		7	0.24	0.19		201	9.31	7.72		7	0.31	0.25
87	Wdr45l	WD repeat domain phosphoinositide-interacting	NM_025793	11	121188548	121215723	2274	+		70	2.05	0.9		145	5.01	2.2		813	37.69	16.57		1771	80.01	35.18
88	4933402P03Rik	hypothetical protein LOC108803	NM_175368	11	69630068	69631942	1615	+		0	0	0		0	0	0		14270	661.63	409.67		0	0	0
89	Ush1g	Usher syndrome type-1G protein homolog	NM_176847	11	115176506	115183232	3183	+		1	0.02	0		2	0.06	0.01		0	0	0		1	0.04	0.01
90	Slc25a39	solute carrier family 25 member 39	NM_026542	11	102264461	102268786	1449	+		927	27.15	18.73		1089	37.63	25.96		6703	310.78	214.47		6691	302.31	208.63
91	Tekt1	tektin-1	NM_011569	11	72158222	72175382	1440	+		13	0.38	0.26		15	0.51	0.35		893	41.4	28.75		31	1.4	0.97
92	Gga3	ADP-ribosylation factor-binding protein GGA3	NM_173048	11	115445569	115465220	3671	+		4768	139.65	38.04		5727	197.94	53.91		406	18.82	5.12		1617	73.06	19.9
93	Ksr1	kinase suppressor of Ras 1	NM_013571	11	78828303	78959856	4087	+		2382	69.76	17.06		2741	94.73	23.17		168	7.78	1.9		722	32.62	7.98
94	Plcd3	1-phosphatidylinositol-4,5-bisphosphate	NM_152813	11	102931633	102962916	2961	+		34	0.99	0.33		34	1.17	0.39		90	4.17	1.4		338	15.27	5.15
95	Shisa6	protein shisa-6 homolog	NM_001034874	11	66025231	66339628	7482	+		127	3.71	0.49		242	8.36	1.11		133	6.16	0.82		7	0.31	0.04
96	Nog	noggin precursor	NM_008711	11	89161952	89163873	1922	+		0	0	0		0	0	0		5	0.23	0.11		4	0.18	0.09
97	Slc22a4	solute carrier family 22 member 4	NM_019687	11	53796628	53841592	2260	+		0	0	0		0	0	0		211	9.78	4.32		0	0	0
98	Anxa6	annexin A6 isoform b	NM_001110211, NM_013472	11	54792464	54846973	2661	+		5649	165.46	62.17		4651	160.75	60.4		3193	148.04	55.63		6301	284.69	106.98
99	Igf2bp1	insulin-like growth factor 2 mRNA-binding	NM_009951	11	95818478	95867258	8382	+		28	0.82	0.09		10	0.34	0.04		19	0.88	0.1		18952	856.3	102.15
100	BC049762	hypothetical protein LOC193286	NM_177567	11	51067153	51076453	883	+		4	0.11	0.12		13	0.44	0.49		227	10.52	11.91		0	0	0
101	1110067D22Rik	galectin-related protein A	NM_173752	11	20723358	20731111	3635	+		934	27.35	7.52		1125	38.88	10.69		42	1.94	0.53		519	23.44	6.44
102	Gm5431	hypothetical protein LOC432555	NM_001024230	11	48701703	48709070	2749	+		0	0	0		0	0	0		118	5.47	1.98		0	0	0
103	Zfp354b	zinc finger protein 354B	NM_013744	11	50735288	50745137	2494	+		81	2.37	0.95		45	1.55	0.62		28	1.29	0.51		7	0.31	0.12
104	Krt16	keratin, type I cytoskeletal 16	NM_008470	11	100107406	100110216	1580	+		0	0	0		0	0	0		0	0	0		12	0.54	0.34
105	Abi3	ABI gene family member 3 isoform 2	NM_001163464, NM_025659	11	95693705	95703474	1440	+		0	0	0		1	0.03	0.02		420	19.47	13.52		28	1.26	0.87
106	Itga2b	integrin alpha-IIb	NM_010575	11	102314611	102331197	3437	+		3	0.08	0.02		6	0.2	0.05		333	15.43	4.48		38	1.71	0.49
107	Cops3	COP9 signalosome complex subunit 3	NM_011991	11	59631306	59653269	1583	+		5289	154.91	97.85		3999	138.21	87.3		572	26.52	16.75		3092	139.7	88.25
108	Olfr394	olfactory receptor 394	NM_147007	11	73700940	73701872	933	+		1	0.02	0.02		0	0	0		0	0	0		0	0	0
109	Ppy	pancreatic prohormone precursor	NM_008918	11	101961245	101962614	480	+		0	0	0		0	0	0		0	0	0		0	0	0
110	Olfr332	olfactory receptor 332	NM_001011770	11	58303251	58304255	1008	+		0	0	0		0	0	0		0	0	0		0	0	0
111	Nek8	serine/threonine-protein kinase Nek8	NM_080849	11	77980022	77990168	2386	+		167	4.89	2.04		201	6.94	2.9		102	4.72	1.97		315	14.23	5.96
112	Med13	mediator of RNA polymerase II transcription	NM_001080931	11	86079217	86171027	11787	+		2043	59.83	5.07		1524	52.67	4.46		1491	69.13	5.86		2284	103.19	8.75
113	Ccl5	C-C motif chemokine 5	NM_013653	11	83339281	83344020	579	+		0	0	0		0	0	0		126	5.84	10.08		16	0.72	1.24
114	Krtap4-16	keratin-associated protein 4-3	NM_001013823	11	99711969	99712919	972	+		0	0	0		0	0	0		0	0	0		0	0	0
115	Gm11596	keratin associated protein 4 family member	NM_001099311	11	99653989	99654606	618	+		0	0	0		0	0	0		0	0	0		0	0	0
116	Glra1	glycine receptor subunit alpha-1	NM_020492	11	55328315	55421292	1407	+		79	2.31	1.64		40	1.38	0.98		0	0	0		8	0.36	0.25
117	Mapk7	mitogen-activated protein kinase 7	NM_011841	11	61302314	61307705	2945	+		238	6.97	2.36		251	8.67	2.94		508	23.55	7.99		1256	56.74	19.26
118	Il4	interleukin 4	NM_021283	11	53425970	53432167	605	+		0	0	0		0	0	0		11	0.51	0.84		0	0	0
119	Gas2l1	GAS2-like protein 1 isoform beta	NM_030228, NM_001190406, NM_001190408, NM_144560	11	4960378	4965303	2839	+		308	9.02	3.17		451	15.58	5.48		4151	192.46	67.79		630	28.46	10.02
120	Zpbp	zona pellucida-binding protein 1 isoform 2	NM_015785, NM_001185153	11	11182516	11362411	1361	+		23	0.67	0.49		10	0.34	0.24		254	11.77	8.64		24	1.08	0.79
121	Nol11	nucleolar protein 11 isoform 1	NM_001161329, NM_133702	11	107027975	107050574	3067	+		70	2.05	0.66		99	3.42	1.11		315	14.6	4.76		3083	139.29	45.41
122	Galk1	galactokinase	NM_016905	11	115869671	115874033	1506	+		172	5.03	3.33		169	5.84	3.87		488	22.62	15.01		4201	189.81	126.03
123	Sqstm1	sequestosome-1	NM_011018	11	50013654	50024292	2000	+		970	28.41	14.2		1064	36.77	18.38		5233	242.62	121.31		5083	229.66	114.83
124	Gm11545	hypothetical protein LOC217122	NM_001105561	11	94616450	94622496	2707	+		16611	486.54	179.73		12507	432.28	159.68		1	0.04	0.01		27	1.21	0.44
125	Rufy1	RUN and FYVE domain containing 1	NM_172557	11	50202805	50244613	2657	+		11484	336.36	126.59		9706	335.47	126.25		1149	53.27	20.04		330	14.91	5.61
126	Kpna2	importin subunit alpha-2	NM_010655	11	106849943	106860839	2071	+		9195	269.32	130.04		6201	214.32	103.48		200	9.27	4.47		2134	96.41	46.55
127	Rars	arginyl-tRNA synthetase, cytoplasmic	NM_025936	11	35621885	35648008	2107	+		7034	206.02	97.77		5620	194.24	92.18		905	41.96	19.91		5041	227.76	108.09
128	Cwc25	Cwc25	NM_026186	11	97606929	97627870	3105	+		486	14.23	4.58		400	13.82	4.45		276	12.79	4.11		856	38.67	12.45
129	Actg1	actin, cytoplasmic 2	NM_009609	11	120207004	120209798	1931	+		497	14.55	7.53		603	20.84	10.79		3895	180.59	93.52		3605	162.88	84.35
130	Ndel1	nuclear distribution protein nudE-like 1	NM_023668	11	68634949	68666555	2330	+		6434	188.45	80.87		4921	170.08	72.99		1061	49.19	21.11		976	44.09	18.92
131	Gdpd1	glycerophosphodiester phosphodiesterase	NM_025638	11	86847391	86887550	2326	+		13540	396.58	170.49		12633	436.63	187.71		615	28.51	12.25		178	8.04	3.45
132	Tcf7	transcription factor 7	NM_009331	11	52066106	52095752	2238	+		2292	67.13	29.99		2348	81.15	36.26		152	7.04	3.14		1287	58.15	25.98
133	Zfp286	zinc finger protein 286	NM_138949	11	62591889	62602919	3006	+		1	0.02	0		0	0	0		12	0.55	0.18		63	2.84	0.94
134	Tmem93	transmembrane protein 93	NM_025318, NM_001168470	11	72989035	72990539	1317	+		1068	31.28	23.75		1101	38.05	28.89		519	24.06	18.26		1246	56.29	42.74
135	Fbxo47	F-box only protein 47	NM_001081435	11	97715621	97745468	1681	+		117	3.42	2.03		145	5.01	2.98		15	0.69	0.41		25	1.12	0.66
136	Gm11569	keratin associated protein 4 family member	NM_001099312	11	99664862	99665760	869	+		0	0	0		0	0	0		0	0	0		0	0	0
137	Zfp385c	zinc finger protein 385C	NM_177790	11	100488860	100512007	2763	+		1	0.02	0		5	0.17	0.06		3	0.13	0.04		23	1.03	0.37
138	1700071K01Rik	prohibitin-like	NM_001033765	11	81386004	81387041	1038	+		3	0.08	0.07		0	0	0		54	2.5	2.4		0	0	0
139	Amac1	protein AMAC1	NM_019871	11	69573387	69575346	1511	+		0	0	0		0	0	0		143	6.63	4.38		1	0.04	0.02
140	Cnot6	CCR4-NOT transcription complex subunit 6	NM_212484	11	49488212	49526212	2516	+		803	23.52	9.34		654	22.6	8.98		596	27.63	10.98		1146	51.77	20.57
141	Arl16	ADP-ribosylation factor-like 16	NM_197995	11	120325640	120328914	2023	+		26	0.76	0.37		19	0.65	0.32		156	7.23	3.57		89	4.02	1.98
142	Fam134c	hypothetical protein LOC360632	NM_028933, NM_026501	11	100957636	100981157	3179	+		4810	140.88	44.31		4076	140.87	44.31		1275	59.11	18.59		1301	58.78	18.49
143	E030025P04Rik	hypothetical protein LOC268498	NM_001085512	11	109000605	109005683	1078	+		0	0	0		0	0	0		0	0	0		0	0	0
144	Aftph	aftiphilin	NM_181411	11	20585088	20641487	3912	+		2803	82.1	20.98		2334	80.67	20.62		1417	65.69	16.79		1043	47.12	12.04
145	Ttc1	tetratricopeptide repeat protein 1	NM_133795	11	43543508	43561475	1469	+		4606	134.91	91.83		2960	102.3	69.63		565	26.19	17.82		1567	70.8	48.19
146	Krt23	keratin, type I cytoskeletal 23	NM_033373	11	99339287	99354424	1560	+		29	0.84	0.53		22	0.76	0.48		2	0.09	0.05		3	0.13	0.08
147	Prr11	proline-rich protein 11	NM_175563	11	86902917	86922191	3558	+		59	1.72	0.48		85	2.93	0.82		68	3.15	0.88		650	29.36	8.25
148	Nt5c	5'(3')-deoxyribonucleotidase, cytosolic type	NM_015807	11	115351740	115353128	820	+		20	0.58	0.7		5	0.17	0.2		409	18.96	23.12		409	18.47	22.52
149	Gm11437	hypothetical protein LOC628813	NM_001037932	11	83961865	83980978	1242	+		1	0.02	0.01		1	0.03	0.02		0	0	0		0	0	0
150	Gjc2	gap junction gamma-2 protein	NM_175452, NM_080454	11	58989070	58996715	2189	+		23	0.67	0.3		30	1.03	0.47		11	0.51	0.23		2	0.09	0.04
151	Ccdc69	coiled-coil domain-containing protein 69	NM_177471	11	54863240	54891633	1419	+		17289	506.39	356.86		9441	326.31	229.95		37	1.71	1.2		9	0.4	0.28
152	Polm	DNA polymerase mu	NM_017401	11	5727863	5737763	2674	+		2920	85.52	31.98		2802	96.84	36.21		90	4.17	1.55		227	10.25	3.83
153	Myocd	myocardin isoform A	NM_146386, NM_145136	11	64990072	65083491	5127	+		21	0.61	0.11		30	1.03	0.2		29	1.34	0.26		0	0	0
154	Pcgf2	polycomb group RING finger protein 2	NM_001163307, NM_009545, NM_001163308	11	97551137	97561660	1605	+		11	0.32	0.19		7	0.24	0.14		103	4.77	2.97		2464	111.33	69.36
155	Nlrp1a	NLR family, pyrin domain containing 1A	NM_001004142	11	70905738	70955868	3903	+		0	0	0		1	0.03	0		19	0.88	0.22		0	0	0
156	Rsad1	radical S-adenosyl methionine domain-containing	NM_001013381	11	94401112	94410521	4167	+		1	0.02	0		3	0.1	0.02		114	5.28	1.26		83	3.75	0.89
157	Fdxr	NADPH:adrenodoxin oxidoreductase, mitochondrial	NM_007997	11	115129339	115138283	1866	+		101	2.95	1.58		90	3.11	1.66		77	3.57	1.91		514	23.22	12.44
158	Map3k14	mitogen-activated protein kinase kinase kinase	NM_016896	11	103081078	103128715	4173	+		2	0.05	0.01		4	0.13	0.03		173	8.02	1.92		21	0.94	0.22
159	Utp6	U3 small nucleolar RNA-associated protein 6	NM_144826	11	79747458	79775889	3871	+		2530	74.1	19.14		2146	74.17	19.16		597	27.68	7.15		3752	169.52	43.79
160	Ntn1	netrin-1 precursor	NM_008744	11	68022866	68200328	5757	+		1326	38.83	6.74		1059	36.6	6.35		355	16.45	2.85		650	29.36	5.09
161	Arhgdia	rho GDP-dissociation inhibitor 1	NM_133796	11	120438549	120442916	2715	+		6353	186.08	68.53		6138	212.14	78.13		15544	720.7	265.45		11116	502.25	184.99
162	Ddc8	differential display clone 8	NM_021440	11	118193674	118203848	1993	+		1	0.02	0.01		0	0	0		1589	73.67	36.96		5	0.22	0.11
163	Cox10	heme A:farnesyltransferase	NM_178379	11	63777388	63892916	1633	+		4579	134.12	82.13		4112	142.12	87.03		167	7.74	4.73		624	28.19	17.26
164	Clm3	CMRF35-like molecule 3 precursor	NM_199201	11	114903445	114909609	738	+		0	0	0		0	0	0		51	2.36	3.19		0	0	0
165	Krt9	keratin, type I cytoskeletal 9	NM_201255	11	100048095	100054560	2580	+		0	0	0		0	0	0		1	0.04	0.01		3	0.13	0.05
166	Cbx4	E3 SUMO-protein ligase CBX4	NM_007625	11	118938885	118947551	5213	+		2	0.05	0		21	0.72	0.13		411	19.05	3.65		68	3.07	0.58
167	Cd300lb	CMRF35-like molecule 7	NM_199221	11	114784095	114795700	2880	+		0	0	0		0	0	0		1099	50.95	17.69		0	0	0
168	Olfr1371	olfactory receptor 1371	NM_207253	11	52026554	52027489	936	+		0	0	0		2	0.06	0.06		0	0	0		0	0	0
169	Acyp2	acylphosphatase-2	NM_029344	11	30405992	30549396	671	+		192	5.62	8.37		108	3.73	5.55		158	7.32	10.9		266	12.01	17.89
170	Krtap4-1	keratin associated protein 4-1	NM_001048196	11	99488543	99489553	1011	+		0	0	0		0	0	0		0	0	0		0	0	0
171	Irgm1	immunity-related GTPase family M protein 1	NM_008326	11	48678751	48684848	2227	+		0	0	0		1	0.03	0.01		763	35.37	15.88		3254	147.02	66.01
172	Trim41	tripartite motif-containing 41	NM_145377	11	48619906	48630893	3493	+		2950	86.4	24.73		2876	99.4	28.45		1335	61.89	17.71		1882	85.03	24.34
173	Phf15	protein Jade-2	NM_199299	11	51626958	51670983	6100	+		15217	445.7	73.06		19089	659.77	108.15		1240	57.49	9.42		663	29.95	4.9
174	Srr	serine racemase	NM_001163311, NM_013761	11	74720298	74739205	3168	+		374	10.95	3.45		529	18.28	5.77		1236	57.3	18.08		2609	117.88	37.2
175	Chrnb1	acetylcholine receptor subunit beta precursor	NM_009601	11	69597538	69609439	2151	+		129	3.77	1.75		123	4.25	1.97		31	1.43	0.66		112	5.06	2.35
176	Unc13d	protein unc-13 homolog D	NM_001009573	11	115923410	115939275	3967	+		0	0	0		1	0.03	0		227	10.52	2.65		247	11.16	2.81
177	2310004I24Rik	manganese-dependent ADP-ribose/CDP-alcohol	NM_025510	11	66851382	66866120	1492	+		678	19.85	13.3		484	16.72	11.2		124	5.74	3.84		486	21.95	14.71
178	Scpep1	retinoid-inducible serine carboxypeptidase	NM_029023	11	88785334	88816741	2078	+		2404	70.41	33.88		1546	53.43	25.71		3725	172.71	83.11		6785	306.56	147.52
179	Olfr410	olfactory receptor 410	NM_146707	11	74147784	74148731	948	+		0	0	0		0	0	0		0	0	0		0	0	0
180	Ccdc117	coiled-coil domain-containing protein 117	NM_134033	11	5428891	5442220	3418	+		20986	614.68	179.83		19050	658.42	192.63		550	25.5	7.46		1928	87.11	25.48
181	Gfap	glial fibrillary acidic protein isoform 1	NM_010277, NM_001131020	11	102749991	102758445	1307	+		0	0	0		0	0	0		3	0.13	0.09		2	0.09	0.06
182	Lyzl6	lysozyme-like protein 6	NM_027083	11	103492389	103500188	914	+		0	0	0		0	0	0		116	5.37	5.87		0	0	0
183	Strada	STE20-related kinase adapter protein alpha	NM_028126	11	106024650	106054862	2015	+		2725	79.81	39.6		2868	99.12	49.19		409	18.96	9.4		1047	47.3	23.47
184	Plxdc1	plexin domain-containing protein 1 isoform 1	NM_028199, NM_001163608	11	97784552	97847694	2840	+		399	11.68	4.11		174	6.01	2.11		651	30.18	10.62		931	42.06	14.8
185	Cpsf4l	cleavage and polyadenylation specific factor	NM_026682, NM_029794, NM_001164532	11	113559485	113571331	1240	+		27205	796.84	642.61		20217	698.76	563.51		262	12.14	9.79		252	11.38	9.17
186	Cant1	soluble calcium-activated nucleotidase 1 isoform	NM_029502, NM_001025617, NM_001025618	11	118267603	118280366	3025	+		1695	49.64	16.4		1829	63.21	20.89		1106	51.27	16.94		1133	51.19	16.92
187	Foxi1	forkhead box protein I1	NM_023907	11	34104341	34108089	2354	+		0	0	0		0	0	0		1162	53.87	22.88		0	0	0
188	P4hb	protein disulfide-isomerase precursor	NM_011032	11	120421618	120434250	2538	+		10378	303.97	119.76		10476	362.08	142.66		15672	726.63	286.3		12136	548.33	216.04
189	Prss38	serine protease 38 precursor	NM_001045521	11	59186171	59189155	1239	+		10	0.29	0.23		13	0.44	0.35		12	0.55	0.44		14	0.63	0.5
190	Aatk	serine/threonine-protein kinase LMTK1	NM_007377, NM_001198787, NM_001198785	11	119868632	119908029	5264	+		0	0	0		0	0	0		218	10.1	1.91		9	0.4	0.07
191	2410002I01Rik	hypothetical protein LOC78777	NM_183137	11	119951836	119960045	2784	+		705	20.64	7.41		488	16.86	6.05		181	8.39	3.01		508	22.95	8.24
192	Nxph3	neurexophilin-3 precursor	NM_130858	11	95371160	95375879	2093	+		0	0	0		0	0	0		22	1.02	0.48		35	1.58	0.75
193	Sgca	alpha-sarcoglycan isoform 1	NM_001136080, NM_009161	11	94824522	94837641	1428	+		73	2.13	1.49		88	3.04	2.12		969	44.92	31.45		1	0.04	0.02
194	Slc2a4	solute carrier family 2, facilitated glucose	NM_009204	11	69755788	69761692	2822	+		9	0.26	0.09		3	0.1	0.03		87	4.03	1.42		31	1.4	0.49
195	Crlf3	cytokine receptor-like factor 3	NM_018776	11	79860001	79894457	2365	+		1104	32.33	13.67		645	22.29	9.42		249	11.54	4.87		2432	109.88	46.46
196	Slc36a2	proton-coupled amino acid transporter 2	NM_153170	11	54971994	54998579	2455	+		0	0	0		0	0	0		89	4.12	1.67		1	0.04	0.01
197	Tha1	threonine aldolase 1	NM_027919	11	117729265	117734795	2687	+		0	0	0		1	0.03	0.01		104	4.82	1.79		17	0.76	0.28
198	Map2k4	dual specificity mitogen-activated protein	NM_009157	11	65501746	65601799	3694	+		9342	273.62	74.07		7522	259.98	70.37		985	45.66	12.36		1089	49.2	13.31
199	Adra1b	alpha-1B adrenergic receptor	NM_007416	11	43588108	43649834	3047	+		28	0.82	0.26		19	0.65	0.21		7	0.32	0.1		4	0.18	0.05
200	Kcnh4	potassium voltage-gated channel, subfamily H	NM_001081194	11	100602917	100620919	3057	+		0	0	0		1	0.03	0		10	0.46	0.15		30	1.35	0.44
201	C630004H02Rik	hypothetical protein LOC217310	NM_175454	11	115209023	115229033	3237	+		1107	32.42	10.01		1419	49.04	15.14		29	1.34	0.41		146	6.59	2.03
202	Cd79b	B-cell antigen receptor complex-associated	NM_008339	11	106172655	106175843	1232	+		0	0	0		1	0.03	0.02		278	12.88	10.45		82	3.7	3
203	Pelp1	proline-, glutamic acid- and leucine-rich	NM_029231	11	70206386	70223530	3434	+		3833	112.26	32.69		3959	136.83	39.84		508	23.55	6.85		6610	298.65	86.96
204	Lgals3bp	galectin-3-binding protein precursor	NM_011150	11	118254066	118263245	2168	+		17	0.49	0.22		9	0.31	0.14		5636	261.31	120.53		416	18.79	8.66
205	Acly	ATP-citrate synthase isoform 1	NM_134037	11	100337670	100389215	4316	+		1831	53.63	12.42		1678	57.99	13.43		10200	472.92	109.57		14980	676.83	156.81
206	Mrpl38	39S ribosomal protein L38, mitochondrial	NM_024177	11	115993131	116000182	1411	+		1049	30.72	21.77		921	31.83	22.55		365	16.92	11.99		2038	92.08	65.25
207	Atpaf2	ATP synthase mitochondrial F1 complex assembly	NM_145427	11	60214132	60230507	1813	+		266	7.79	4.29		244	8.43	4.64		316	14.65	8.08		792	35.78	19.73
208	Nup88	nuclear pore complex protein Nup88 isoform 2	NM_001083331, NM_172394	11	70756573	70783475	2450	+		9083	266.04	108.58		6561	226.76	92.55		922	42.74	17.44		6112	276.15	112.71
209	AF251705	CMRF35-like molecule	NM_134158	11	114858083	114863194	1139	+		0	0	0		0	0	0		2000	92.73	81.41		1	0.04	0.03
210	Flcn	folliculin	NM_146018	11	59605253	59623275	2864	+		3661	107.23	37.44		2549	88.1	30.76		781	36.21	12.64		1866	84.31	29.43
211	Kdm6b	lysine-specific demethylase 6B	NM_001017426	11	69212020	69227177	6654	+		10572	309.65	46.53		10413	359.9	54.08		779	36.11	5.42		2741	123.84	18.61
212	Zfp750	protein ZNF750	NM_178763	11	121372292	121380616	3201	+		10724	314.1	98.12		10235	353.75	110.51		229	10.61	3.31		89	4.02	1.25
213	Pemt	phosphatidylethanolamine N-methyltransferase	NM_008819	11	59784119	59850341	848	+		254	7.43	8.76		202	6.98	8.23		111	5.14	6.06		50	2.25	2.65
214	Stac2	SH3 and cysteine-rich domain-containing protein	NM_146028	11	97897938	97914776	3049	+		4	0.11	0.03		1	0.03	0		887	41.12	13.48		308	13.91	4.56
215	Krtap9-3	keratin-associated protein 9-3	NM_029351	11	99458662	99459420	759	+		0	0	0		0	0	0		0	0	0		0	0	0
216	Nacad	NAC alpha domain containing	NM_001081652	11	6497826	6506057	4914	+		881	25.8	5.25		830	28.68	5.83		21	0.97	0.19		17	0.76	0.15
217	Pex13	peroxisomal membrane protein PEX13	NM_023651	11	23546479	23565935	4122	+		4073	119.29	28.93		3548	122.63	29.75		440	20.4	4.94		1120	50.6	12.27
218	Cobl	protein cordon-bleu	NM_172496	11	12136679	12364963	5633	+		1042	30.52	5.41		1027	35.49	6.3		292	13.53	2.4		6126	276.78	49.13
219	Alox12	arachidonate 12-lipoxygenase, 12S-type	NM_007440	11	70054957	70068843	2991	+		417	12.21	4.08		381	13.16	4.39		925	42.88	14.33		50	2.25	0.75
220	0610010F05Rik	hypothetical protein LOC71675	NM_027860	11	23473776	23533631	4140	+		151	4.42	1.06		172	5.94	1.43		348	16.13	3.89		373	16.85	4.07
221	Krt12	keratin, type I cytoskeletal 12	NM_010661	11	99276978	99283573	1854	+		1176	34.44	18.57		948	32.76	17.66		0	0	0		2	0.09	0.04
222	Thoc4	THO complex 4	NM_011568	11	120455830	120459679	1132	+		907	26.56	23.46		797	27.54	24.32		276	12.79	11.29		4722	213.35	188.47
223	Fam171a2	hypothetical protein LOC217219 precursor	NM_199200	11	102298296	102308977	3099	+		2	0.05	0.01		2	0.06	0.01		108	5	1.61		138	6.23	2.01
224	Tnk1	non-receptor tyrosine-protein kinase TNK1	NM_031880	11	69664601	69672219	2693	+		3	0.08	0.02		4	0.13	0.04		158	7.32	2.71		185	8.35	3.1
225	Myo1g	myosin-Ig	NM_178440	11	6406555	6420961	3303	+		0	0	0		1	0.03	0		1450	67.22	20.35		115	5.19	1.57
226	Rpl23	60S ribosomal protein L23	NM_022891	11	97638858	97643687	979	+		1650	48.32	49.35		938	32.42	33.11		5706	264.56	270.23		9523	430.27	439.49
227	Emid1	EMI domain-containing protein 1 precursor	NM_080595	11	5006269	5052225	1911	+		7	0.2	0.1		5	0.17	0.08		140	6.49	3.39		106	4.78	2.5
228	Lgals9	galectin-9 isoform 2	NM_010708, NM_001159301	11	78776897	78798333	1077	+		45	1.31	1.21		38	1.31	1.21		1172	54.34	50.45		678	30.63	28.44
229	Mmp28	matrix metalloproteinase-28 isoform 2	NM_172797, NM_080453	11	83255378	83276463	2311	+		0	0	0		0	0	0		107	4.96	2.14		29	1.31	0.56
230	Fgf18	fibroblast growth factor 18 precursor	NM_008005	11	33017431	33047400	1094	+		13	0.38	0.34		28	0.96	0.87		46	2.13	1.94		15	0.67	0.61
231	5730455P16Rik	protein Njmu-R1	NM_027472	11	80174701	80191498	3808	+		176	5.15	1.35		171	5.91	1.55		262	12.14	3.18		277	12.51	3.28
232	Ccdc99	protein Spindly	NM_027411	11	34622687	34647143	2526	+		5494	160.92	63.7		4523	156.32	61.88		128	5.93	2.34		1342	60.63	24
233	Eme1	crossover junction endonuclease EME1	NM_177752	11	94506316	94515068	2228	+		567	16.6	7.45		532	18.38	8.24		115	5.33	2.39		1208	54.58	24.49
234	Nme1	nucleoside diphosphate kinase A	NM_008704	11	93820239	93829835	1235	+		168	4.92	3.98		147	5.08	4.11		1559	72.28	58.52		4719	213.21	172.63
235	Nr1d1	nuclear receptor subfamily 1 group D member 1	NM_145434	11	98629249	98636556	2627	+		2025	59.31	22.57		1728	59.72	22.73		365	16.92	6.44		459	20.73	7.89
236	Dhx40	probable ATP-dependent RNA helicase DHX40	NM_026191	11	86582351	86621162	3724	+		2493	73.02	19.6		2226	76.93	20.65		720	33.38	8.96		2240	101.2	27.17
237	Tmem102	transmembrane protein 102	NM_001033433	11	69617099	69619172	1985	+		546	15.99	8.05		793	27.4	13.8		134	6.21	3.12		94	4.24	2.13
238	Kif18b	kinesin-like protein KIF18B	NM_197959	11	102766843	102786406	3358	+		702	20.56	6.12		830	28.68	8.54		100	4.63	1.37		1551	70.07	20.86
239	Efcab5	EF-hand calcium-binding domain-containing	NM_176965	11	76903417	77002470	4654	+		290	8.49	1.82		259	8.95	1.92		445	20.63	4.43		145	6.55	1.4
240	Ezh1	histone-lysine N-methyltransferase EZH1	NM_007970	11	101052430	101089262	4185	+		3790	111.01	26.52		3094	106.93	25.55		758	35.14	8.39		735	33.2	7.93
241	1700113I22Rik	hypothetical protein LOC73635	NM_026865	11	101280128	101286647	1461	+		291	8.52	5.83		246	8.5	5.81		121	5.61	3.83		108	4.87	3.33
242	Pycr1	pyrroline-5-carboxylate reductase 1,	NM_144795	11	120497026	120504984	2914	+		87	2.54	0.87		81	2.79	0.95		33	1.53	0.52		1007	45.49	15.61
243	Maml1	mastermind-like protein 1	NM_175334	11	50069137	50105838	5573	+		626	18.33	3.28		923	31.9	5.72		416	19.28	3.45		1197	54.08	9.7
244	Abr	active breakpoint cluster region-related protein	NM_198895, NM_198894, NM_198018	11	76230236	76391229	5263	+		7156	209.6	39.82		8238	284.73	54.1		2272	105.34	20.01		2899	130.98	24.88
245	Hdac5	histone deacetylase 5	NM_010412, NM_001077696	11	102057061	102091486	3816	+		2	0.05	0.01		10	0.34	0.08		1753	81.27	21.29		1969	88.96	23.31
246	Nfe2l1	nuclear factor erythroid 2-related factor 1	NM_001130453, NM_001130452, NM_001130454, NM_008686, NM_001130451, NM_001130450	11	96678745	96689269	4260	+		11885	348.11	81.71		11031	381.26	89.49		2864	132.79	31.17		7502	338.96	79.56
247	Osbp2	oxysterol-binding protein 2	NM_152818	11	3603734	3763906	4138	+		3253	95.28	23.02		4126	142.6	34.46		29586	1371.76	331.5		10	0.45	0.1
248	Pitpnc1	cytoplasmic phosphatidylinositol transfer	NM_145823	11	107069206	107332034	6350	+		134	3.92	0.61		102	3.52	0.55		1074	49.79	7.84		1389	62.75	9.88
249	Rasd1	dexamethasone-induced Ras-related protein 1	NM_009026	11	59776685	59778444	1609	+		23	0.67	0.41		31	1.07	0.66		269	12.47	7.75		14	0.63	0.39
250	Olfr381	olfactory receptor 381	NM_147022	11	73299389	73300324	936	+		0	0	0		0	0	0		0	0	0		0	0	0
251	Slfn10-ps	schlafen 10	NM_181542	11	82841630	82854035	3516	+		0	0	0		0	0	0		70	3.24	0.92		2	0.09	0.02
252	Gpr179	probable G-protein coupled receptor 179	NM_001081220	11	97193423	97213387	9276	+		5	0.14	0.01		9	0.31	0.03		167	7.74	0.83		24	1.08	0.11
253	B3gnt2	UDP-GlcNAc:betaGal	NM_001169114, NM_016888	11	22734747	22759680	2672	+		1858	54.42	20.36		2325	80.35	30.07		649	30.09	11.26		2201	99.44	37.21
254	Odz2	teneurin-2	NM_011856	11	35820171	36757745	9738	+		272	7.96	0.81		202	6.98	0.71		209	9.69	0.99		2	0.09	0
255	Tmem92-ps	transmembrane protein 92 isoform 1	NM_001163172, NM_001034896	11	94638531	94644017	2043	+		55	1.61	0.78		29	1	0.48		0	0	0		22	0.99	0.48
256	Mif4gd	MIF4G domain-containing protein	NM_027162	11	115469233	115473817	1670	+		518	15.17	9.08		470	16.24	9.72		680	31.52	18.87		1321	59.68	35.73
257	Uqcrq	cytochrome b-c1 complex subunit 8	NM_025352	11	53242450	53244333	511	+		1876	54.94	107.51		1609	55.61	108.82		2152	99.77	195.24		3635	164.23	321.38
258	Cyfip2	cytoplasmic FMR1-interacting protein 2	NM_133769	11	46007360	46125852	6352	+		3583	104.94	16.52		2969	102.61	16.15		1982	91.89	14.46		748	33.79	5.31
259	Cpd	carboxypeptidase D precursor	NM_007754	11	76590710	76660510	9152	+		2139	62.65	6.84		1832	63.31	6.91		3871	179.47	19.6		422	19.06	2.08
260	Nsf	vesicle-fusing ATPase	NM_008740	11	103683097	103815370	3766	+		21450	628.27	166.82		21954	758.8	201.48		1375	63.75	16.92		4176	188.68	50.1
261	Rad50	DNA repair protein RAD50	NM_009012	11	53463021	53520821	5153	+		7380	216.16	41.94		6455	223.1	43.29		434	20.12	3.9		1808	81.69	15.85
262	1200011M11Rik	protein SMG8	NM_024262	11	86891234	86900279	3236	+		6108	178.9	55.28		5136	177.51	54.85		283	13.12	4.05		1686	76.17	23.53
263	Flii	protein flightless-1 homolog	NM_022009	11	60527651	60540723	4012	+		4798	140.53	35.02		4978	172.05	42.88		2092	96.99	24.17		2184	98.67	24.59
264	Cbr2	carbonyl reductase [NADPH] 2	NM_007621	11	120590823	120593309	984	+		0	0	0		2	0.06	0.06		234	10.84	11.01		0	0	0
265	Tmem11	transmembrane protein 11 isoform 2	NM_001168507, NM_173453	11	60677956	60692534	1216	+		960	28.11	23.11		788	27.23	22.39		370	17.15	14.1		2002	90.45	74.38
266	Nipal4	magnesium transporter NIPA4	NM_172524	11	45961657	45979861	3295	+		0	0	0		1	0.03	0		236	10.94	3.32		8	0.36	0.1
267	Rnf185	RING finger protein 185	NM_145355	11	3315986	3352328	2867	+		17865	523.27	182.51		13415	463.66	161.72		904	41.91	14.61		1204	54.4	18.97
268	Hcrt	orexin precursor	NM_010410	11	100623007	100624245	584	+		1	0.02	0.03		2	0.06	0.1		2	0.09	0.15		0	0	0
269	Wap	whey acidic protein precursor	NM_011709	11	6535486	6538652	562	+		0	0	0		1	0.03	0.05		0	0	0		0	0	0
270	Aarsd1	alanyl-tRNA editing protein Aarsd1	NM_144829	11	101268154	101278747	1346	+		803	23.52	17.47		740	25.57	18.99		375	17.38	12.91		2502	113.04	83.98
271	Lpo	lactoperoxidase	NM_080420	11	87619930	87639612	2955	+		0	0	0		0	0	0		10	0.46	0.15		0	0	0
272	D11Bwg0517e	fox-1 homolog C isoform 2	NM_001024931, NM_001039167, NM_001039168	11	118351074	118770886	4545	+		61	1.78	0.39		33	1.14	0.25		261	12.1	2.66		61	2.75	0.6
273	Cryba1	beta-crystallin A1	NM_009965	11	77532234	77538795	683	+		0	0	0		2	0.06	0.08		0	0	0		4	0.18	0.26
274	Lhx1	LIM/homeobox protein Lhx1	NM_008498	11	84332881	84339036	2750	+		0	0	0		0	0	0		20	0.92	0.33		1	0.04	0.01
275	Inpp5j	phosphatidylinositol 4,5-bisphosphate	NM_172439	11	3394386	3404824	3362	+		3	0.08	0.02		3	0.1	0.02		79	3.66	1.08		10	0.45	0.13
276	Olfr411	olfactory receptor 411	NM_146709	11	74160152	74161084	936	+		0	0	0		0	0	0		0	0	0		0	0	0
277	Etaa1	ewing's tumor-associated antigen 1 homolog	NM_026576	11	17839895	17853848	3032	+		4399	128.84	42.49		3686	127.4	42.01		113	5.23	1.72		1439	65.01	21.44
278	Slc16a6	monocarboxylate transporter 7 isoform b	NM_134038, NM_001029842	11	109312170	109334910	4217	+		75	2.19	0.51		249	8.6	2.03		788	36.53	8.66		485	21.91	5.19
279	Rad51c	RAD51 homolog C	NM_053269	11	87190150	87217941	3882	+		1771	51.87	13.36		1089	37.63	9.69		53	2.45	0.63		542	24.48	6.3
280	B4galnt2	beta-1,4 N-acetylgalactosaminyltransferase 2	NM_008081	11	95724873	95776185	4086	+		66	1.93	0.47		204	7.05	1.72		35	1.62	0.39		169	7.63	1.86
281	1700081L11Rik	hypothetical protein LOC76719	NM_001081045	11	104194543	104303605	5510	+		5776	169.18	30.7		4217	145.75	26.45		1233	57.16	10.37		2904	131.21	23.81
282	Cdc42se2	CDC42 small effector protein 2	NM_178626	11	54531004	54601138	2985	+		25269	740.13	247.94		21183	732.15	245.27		1661	77.01	25.79		3173	143.36	48.02
283	Taok1	serine/threonine-protein kinase TAO1	NM_144825	11	77342664	77421317	12411	+		7614	223.01	17.96		6987	241.49	19.45		1545	71.63	5.77		2139	96.64	7.78
284	Mpp2	membrane protein, palmitoylated 2	NM_016695	11	101918333	101949816	4098	+		18	0.52	0.12		26	0.89	0.21		154	7.14	1.74		115	5.19	1.26
285	D11Wsu99e	hypothetical protein LOC28081	NM_138598	11	113522633	113545465	2635	+		1642	48.09	18.25		1918	66.29	25.15		2407	111.6	42.35		1122	50.69	19.23
286	Olfr1	olfactory receptor 1	NM_146921	11	73208578	73209522	945	+		0	0	0		0	0	0		0	0	0		0	0	0
287	Alox15	arachidonate 12-lipoxygenase, leukocyte-type	NM_009660	11	70157649	70165533	2414	+		2	0.05	0.02		4	0.13	0.05		663	30.74	12.73		4	0.18	0.07
288	Gjd3	gap junction delta-3 protein	NM_178596	11	98843494	98844330	837	+		0	0	0		0	0	0		8	0.37	0.44		2	0.09	0.1
289	Evi2b	protein EVI2B precursor	NM_146023, NM_001077496	11	79326887	79344091	3944	+		141	4.12	1.04		123	4.25	1.07		1745	80.9	20.51		4	0.18	0.04
290	Smurf2	E3 ubiquitin-protein ligase SMURF2	NM_025481	11	106683889	106781709	2500	+		5240	153.48	61.39		4449	153.77	61.5		402	18.63	7.45		747	33.75	13.5
291	Olfr393	olfactory receptor 393	NM_147008	11	73660687	73661625	939	+		0	0	0		2	0.06	0.06		0	0	0		0	0	0
292	Cd300ld	CMRF35-like molecule 5 precursor	NM_145437	11	114843761	114851200	2440	+		0	0	0		0	0	0		509	23.59	9.66		2	0.09	0.03
293	Slc25a19	mitochondrial thiamine pyrophosphate carrier	NM_026071	11	115476297	115489453	1496	+		1472	43.11	28.81		1252	43.27	28.92		311	14.41	9.63		771	34.83	23.28
294	Zfp39	zinc finger protein 39	NM_011758	11	58701655	58717727	3890	+		67	1.96	0.5		66	2.28	0.58		379	17.57	4.51		139	6.28	1.61
295	Nme2	nucleoside diphosphate kinase B	NM_001077529, NM_008705	11	93811129	93817321	777	+		55	1.61	2.07		48	1.65	2.12		1771	82.11	105.67		7260	328.02	422.16
296	Wnt3a	protein Wnt-3a precursor	NM_009522	11	59061544	59104254	2814	+		0	0	0		3	0.1	0.03		3	0.13	0.04		25	1.12	0.39
297	Eral1	GTP-binding protein era homolog	NM_022313	11	77886878	77893885	2055	+		352	10.31	5.01		337	11.64	5.66		217	10.06	4.89		859	38.81	18.88
298	Dnajc7	dnaJ homolog subfamily C member 7	NM_019795	11	100444150	100481482	2312	+		6750	197.7	85.51		5189	179.34	77.56		2043	94.72	40.96		5777	261.02	112.89
299	Srsf2	serine/arginine-rich splicing factor 2	NM_011358	11	116711221	116714396	1900	+		3315	97.09	51.1		3157	109.11	57.42		1754	81.32	42.8		13418	606.26	319.08
300	Cacng5	voltage-dependent calcium channel gamma-5	NM_080644	11	107735919	107772676	3678	+		0	0	0		0	0	0		22	1.02	0.27		4	0.18	0.04
301	Ankrd13b	ankyrin repeat domain-containing protein 13B	NM_172945	11	77283989	77303180	3336	+		95	2.78	0.83		129	4.45	1.33		312	14.46	4.33		204	9.21	2.76
302	1110031I02Rik	PKHD domain-containing transmembrane protein	NM_025402	11	121038907	121065962	1243	+		429	12.56	10.1		356	12.3	9.89		534	24.75	19.91		269	12.15	9.77
303	Meox1	homeobox protein MOX-1	NM_010791	11	101738824	101755668	2235	+		45	1.31	0.58		39	1.34	0.59		6	0.27	0.12		1	0.04	0.01
304	Otx1	homeobox protein OTX1	NM_011023	11	21894767	21901654	2842	+		611	17.89	6.29		947	32.73	11.51		0	0	0		35	1.58	0.55
305	Gas2l2	GAS2-like protein 2	NM_001013759	11	83235404	83242957	2610	+		0	0	0		1	0.03	0.01		0	0	0		0	0	0
306	Cyth1	cytohesin-1 isoform 1	NM_001112700, NM_001112699, NM_011180	11	118025480	118109906	3179	+		134	3.92	1.23		103	3.56	1.11		829	38.43	12.08		161	7.27	2.28
307	Ern1	serine/threonine-protein kinase/endoribonuclease	NM_023913	11	106258934	106349110	3976	+		31656	927.21	233.2		29931	1034.51	260.18		1131	52.43	13.18		199	8.99	2.26
308	Dhx58	probable ATP-dependent RNA helicase DHX58	NM_030150	11	100556198	100565585	2427	+		2	0.05	0.02		3	0.1	0.04		473	21.93	9.03		64	2.89	1.19
309	Krtap1-5	keratin associated protein 1-5	NM_027157	11	99441298	99442330	1033	+		0	0	0		0	0	0		0	0	0		0	0	0
310	Guk1	guanylate kinase isoform 2	NM_008193, NM_001159410	11	58997377	59005318	961	+		143	4.18	4.34		107	3.69	3.83		927	42.98	44.72		1562	70.57	73.43
311	2810408A11Rik	protein phosphatase inhibitor 2-like	NM_027419	11	69710860	69714488	1674	+		6	0.17	0.1		20	0.69	0.41		7125	330.35	197.34		97	4.38	2.61
312	Tmem199	transmembrane protein 199	NM_199199	11	78320557	78325670	1414	+		1789	52.4	37.05		1265	43.72	30.91		289	13.39	9.46		620	28.01	19.8
313	Rgs9	regulator of G-protein signaling 9 isoform 2	NM_011268, NM_001165934	11	109086669	109159495	2486	+		118	3.45	1.38		136	4.7	1.89		739	34.26	13.78		283	12.78	5.14
314	Ccdc56	coiled-coil domain-containing protein 56	NM_026618	11	101139284	101140262	718	+		81	2.37	3.3		88	3.04	4.23		990	45.9	63.92		737	33.29	46.36
315	Rhbdf1	rhomboid family member 1	NM_010117	11	32109585	32122238	2904	+		1849	54.15	18.64		2018	69.74	24.01		147	6.81	2.34		427	19.29	6.64
316	Gm16515	protein GTLF3B	NM_025294	11	60715748	60727292	4161	+		18432	539.87	129.74		16885	583.6	140.25		480	22.25	5.34		1125	50.83	12.21
317	Dcxr	L-xylulose reductase	NM_026428	11	120586687	120588595	918	+		76	2.22	2.41		62	2.14	2.33		380	17.61	19.18		109	4.92	5.35
318	Dnahc9	dynein heavy chain 9, axonemal	NM_001099633	11	65644826	65982053	13774	+		2245	65.75	4.77		2108	72.85	5.28		112	5.19	0.37		0	0	0
319	Ormdl3	ORM1-like protein 3	NM_025661	11	98442608	98448559	2023	+		9	0.26	0.12		16	0.55	0.27		406	18.82	9.3		771	34.83	17.21
320	A430084P05Rik	transmembrane protein C17orf87 homolog	NM_001045526	11	70604434	70626063	1055	+		14	0.41	0.38		11	0.38	0.36		27	1.25	1.18		0	0	0
321	Gjc1	gap junction gamma-1 protein	NM_008122, NM_001159382, NM_001159383	11	102660893	102665955	2073	+		49	1.43	0.68		17	0.58	0.27		80	3.7	1.78		2153	97.27	46.92
322	Olfr382	olfactory receptor 382	NM_146443	11	73329761	73330699	939	+		0	0	0		0	0	0		0	0	0		0	0	0
323	Shmt1	serine hydroxymethyltransferase 1 (soluble)	NM_009171	11	60602399	60624767	2074	+		67	1.96	0.94		80	2.76	1.33		79	3.66	1.76		3646	164.73	79.42
324	Gh	somatotropin precursor	NM_008117	11	106161582	106163124	935	+		1	0.02	0.02		0	0	0		0	0	0		1	0.04	0.04
325	Brip1	Fanconi anemia group J protein homolog	NM_178309	11	85871640	86014695	6934	+		6506	190.56	27.48		4357	150.59	21.71		55	2.55	0.36		680	30.72	4.43
326	Kctd11	BTB/POZ domain-containing protein KCTD11	NM_153143	11	69691766	69694487	2740	+		3	0.08	0.02		1	0.03	0.01		164	7.6	2.77		37	1.67	0.6
327	Ankrd43	ankyrin repeat domain-containing protein 43	NM_183173	11	53290080	53293697	3644	+		0	0	0		0	0	0		3	0.13	0.03		9	0.4	0.1
328	Olfr399	olfactory receptor 399	NM_147004	11	73867324	73868259	936	+		0	0	0		0	0	0		0	0	0		0	0	0
329	Cygb	cytoglobin	NM_030206	11	116506909	116515627	2331	+		0	0	0		0	0	0		754	34.95	14.99		2	0.09	0.03
330	Arhgef15	rho guanine nucleotide exchange factor 15	NM_177566	11	68756656	68770360	4213	+		0	0	0		2	0.06	0.01		6	0.27	0.06		188	8.49	2.01
331	Ints2	integrator complex subunit 2	NM_027421	11	86024185	86071070	5922	+		758	22.2	3.74		592	20.46	3.45		247	11.45	1.93		1525	68.9	11.63
332	Zfp867	zinc finger protein 867	NM_178417	11	59274699	59285976	3412	+		55	1.61	0.47		31	1.07	0.31		49	2.27	0.66		161	7.27	2.13
333	Nlk	serine/threonine-protein kinase NLK	NM_008702	11	78380670	78510927	4507	+		1495	43.78	9.71		1488	51.43	11.41		427	19.79	4.39		1180	53.31	11.82
334	Fabp6	gastrotropin	NM_008375	11	43409614	43415013	387	+		18	0.52	1.34		15	0.51	1.31		0	0	0		1	0.04	0.1
335	Krtap4-6	keratin associated protein 4-6	NM_026834	11	99526357	99527274	918	+		4	0.11	0.11		1	0.03	0.03		0	0	0		0	0	0
336	St6galnac1	alpha-N-acetylgalactosaminide	NM_011371	11	116626339	116636821	2396	+		0	0	0		0	0	0		3	0.13	0.05		0	0	0
337	Sh3d20	SH3 domain containing 20	NM_183288	11	103221051	103224698	1426	+		1	0.02	0.01		4	0.13	0.09		65	3.01	2.11		24	1.08	0.75
338	Odf4	outer dense fiber protein 4	NM_145746	11	68735337	68740551	1085	+		0	0	0		0	0	0		814	37.74	34.78		0	0	0
339	Il3	interleukin-3 precursor	NM_010556	11	54078587	54080781	849	+		2	0.05	0.05		1	0.03	0.03		0	0	0		0	0	0
340	Olfr462	olfactory receptor 462	NM_146411	11	87702461	87703396	936	+		0	0	0		0	0	0		0	0	0		0	0	0
341	Cdc42ep4	cdc42 effector protein 4	NM_020006, NM_001163346	11	113588164	113612632	3420	+		13	0.38	0.11		102	3.52	1.02		1074	49.79	14.55		1242	56.11	16.4
342	Sectm1b	secreted and transmembrane protein 1b precursor	NM_026907	11	120914737	120924883	2322	+		3	0.08	0.03		2	0.06	0.02		16	0.74	0.31		0	0	0
343	Olfr398	olfactory receptor 398	NM_146710	11	73797164	73798108	945	+		0	0	0		0	0	0		0	0	0		0	0	0
344	Nptx1	neuronal pentraxin-1 precursor	NM_008730	11	119400033	119409134	5284	+		0	0	0		0	0	0		79	3.66	0.69		12	0.54	0.1
345	Socs3	suppressor of cytokine signaling 3	NM_007707	11	117827401	117830476	2545	+		231	6.76	2.65		494	17.07	6.7		196	9.08	3.56		4170	188.41	74.03
346	Stxbp4	syntaxin-binding protein 4	NM_011505	11	90341248	90499387	2574	+		1193	34.94	13.57		1141	39.43	15.31		53	2.45	0.95		163	7.36	2.85
347	Vrk2	serine/threonine-protein kinase VRK2	NM_027260	11	26371402	26493920	1906	+		146	4.27	2.24		165	5.7	2.99		158	7.32	3.84		358	16.17	8.48
348	Rnasek	ribonuclease kappa	NM_173742	11	70051628	70053348	613	+		952	27.88	45.48		692	23.91	39		2094	97.08	158.36		1087	49.11	80.11
349	Msi2	RNA-binding protein Musashi homolog 2	NM_054043	11	88152884	88579543	6505	+		253	7.41	1.13		147	5.08	0.78		3229	149.71	23.01		1487	67.18	10.32
350	4930504O13Rik	hypothetical protein LOC403200	NM_207527	11	58259651	58266425	549	+		5	0.14	0.25		21	0.72	1.31		244	11.31	20.6		0	0	0
351	Itk	tyrosine-protein kinase ITK/TSK	NM_010583	11	46138652	46203017	4284	+		89	2.6	0.6		7	0.24	0.05		23	1.06	0.24		0	0	0
352	Rai12	S-phase 2 protein	NM_018740	11	69781727	69794012	1371	+		2075	60.77	44.32		1822	62.97	45.92		667	30.92	22.55		1303	58.87	42.93
353	Btnl9	butyrophilin-like protein 9	NM_172793	11	48981827	49000591	2463	+		0	0	0		3	0.1	0.04		0	0	0		0	0	0
354	Limk2	LIM domain kinase 2 isoform c	NM_010718, NM_173053, NM_001034030	11	3243300	3309238	4668	+		5676	166.25	35.61		5020	173.5	37.16		855	39.64	8.49		2475	111.82	23.95
355	Npepps	puromycin-sensitive aminopeptidase	NM_008942	11	97067171	97141890	4161	+		282	8.25	1.98		396	13.68	3.28		1725	79.98	19.22		3958	178.83	42.97
356	Myo1d	myosin-Id	NM_177390	11	80295629	80593527	5353	+		1813	53.1	9.91		1792	61.93	11.56		840	38.94	7.27		200	9.03	1.68
357	Krt15	keratin, type I cytoskeletal 15	NM_008469	11	99993331	99997172	1359	+		0	0	0		0	0	0		366	16.96	12.47		3	0.13	0.09
358	Ccl3	C-C motif chemokine 3	NM_011337	11	83461345	83462880	804	+		11	0.32	0.39		11	0.38	0.47		473	21.93	27.27		1	0.04	0.04
359	Dnahc2	dynein heavy chain 2, axonemal	NM_001081330	11	69234311	69362610	13704	+		469	13.73	1		513	17.73	1.29		330	15.3	1.11		185	8.35	0.6
360	Tmem101	transmembrane protein 101	NM_029649	11	102013863	102017675	1528	+		49	1.43	0.93		50	1.72	1.12		117	5.42	3.54		668	30.18	19.75
361	Pnpo	pyridoxine-5'-phosphate oxidase	NM_134021	11	96799130	96805333	2048	+		599	17.54	8.56		564	19.49	9.51		746	34.58	16.88		642	29	14.16
362	Krtap3-2	keratin-associated protein 3-2	NM_025720	11	99417137	99418167	1031	+		0	0	0		0	0	0		0	0	0		0	0	0
363	E130012A19Rik	hypothetical protein LOC103551	NM_175332	11	97488701	97491030	2349	+		35	1.02	0.43		55	1.9	0.8		15	0.69	0.29		4395	198.57	84.53
364	Fam58b	cyclin-related protein FAM58A	NM_197989	11	78564008	78565231	1243	+		139	4.07	3.27		208	7.18	5.77		144	6.67	5.36		203	9.17	7.37
365	Nprl3	nitrogen permease regulator 3-like protein	NM_181569	11	32132419	32167614	2316	+		355	10.39	4.48		243	8.39	3.62		309	14.32	6.18		276	12.47	5.38
366	Rpl23a	60S ribosomal protein L23a	NM_207523	11	77994437	77997045	531	+		1165	34.12	64.25		953	32.93	62.01		2786	129.17	243.25		11643	526.06	990.69
367	Myl7	myosin regulatory light chain 2, atrial isoform	NM_022879	11	5796640	5798785	599	+		1	0.02	0.03		0	0	0		5	0.23	0.38		108	4.87	8.13
368	Fads6	fatty acid desaturase 6	NM_178035	11	115144680	115158828	1225	+		0	0	0		0	0	0		116	5.37	4.38		43	1.94	1.58
369	Gm11541	hypothetical protein LOC432589	NM_001007584	11	94555812	94565813	1681	+		26	0.76	0.45		25	0.86	0.51		2	0.09	0.05		1	0.04	0.02
370	Gosr2	Golgi SNAP receptor complex member 2	NM_019650	11	103538175	103559008	3082	+		3002	87.92	28.52		2781	96.12	31.18		3331	154.44	50.11		1254	56.65	18.38
371	Acap1	arf-GAP with coiled-coil, ANK repeat and PH	NM_153788	11	69695069	69709041	2482	+		27	0.79	0.31		16	0.55	0.22		106	4.91	1.97		138	6.23	2.51
372	Bptf	bromodomain PHD finger transcription factor	NM_176850	11	106894395	106993236	11506	+		13245	387.94	33.71		11997	414.65	36.03		1469	68.11	5.91		5595	252.79	21.97
373	Tk1	thymidine kinase, cytosolic	NM_009387	11	117676840	117687267	1299	+		576	16.87	12.98		671	23.19	17.85		118	5.47	4.21		1877	84.8	65.28
374	Tex2	testis-expressed sequence 2 protein	NM_198292	11	106363453	106474244	4947	+		5277	154.56	31.24		4806	166.11	33.57		3061	141.92	28.68		1398	63.16	12.76
375	Znhit3	zinc finger HIT domain-containing protein 3	NM_001005223	11	84724457	84729858	983	+		329	9.63	9.79		231	7.98	8.11		121	5.61	5.7		781	35.28	35.89
376	Tmc6	transmembrane channel-like protein 6 isoform 1	NM_181321, NM_145439	11	117627302	117641935	2848	+		2	0.05	0.01		3	0.1	0.03		255	11.82	4.15		711	32.12	11.27
377	Plekhm1	pleckstrin homology domain-containing family M	NM_183034	11	103226406	103273978	5144	+		2706	79.25	15.4		2881	99.57	19.35		2261	104.83	20.37		2087	94.29	18.33
378	Gck	glucokinase	NM_010292	11	5800826	5849602	2245	+		105	3.07	1.36		66	2.28	1.01		37	1.71	0.76		22	0.99	0.44
379	H3f3b	histone H3.3	NM_008211	11	115883275	115885818	1993	+		6977	204.35	102.53		4955	171.26	85.93		4095	189.86	95.26		6678	301.73	151.39
380	Rfng	beta-1,3-N-acetylglucosaminyltransferase radical	NM_009053	11	120642059	120645518	2141	+		662	19.39	9.05		768	26.54	12.39		264	12.24	5.71		477	21.55	10.06
381	Actr2	actin-related protein 2	NM_146243	11	19962307	20012916	3659	+		4706	137.83	37.66		2554	88.27	24.12		5142	238.41	65.15		6596	298.02	81.44
382	Rpa1	replication protein A 70 kDa DNA-binding subunit	NM_001164223, NM_026653	11	75113850	75161806	2900	+		11445	335.22	115.59		10093	348.84	120.28		932	43.21	14.9		9933	448.8	154.75
383	Krt24	keratin, type I cytoskeletal 24	NM_029393	11	99141407	99146552	1689	+		0	0	0		1	0.03	0.01		0	0	0		0	0	0
384	Rnf112	RING finger protein 112	NM_009548	11	61261944	61267388	2998	+		0	0	0		0	0	0		19	0.88	0.29		1	0.04	0.01
385	Foxn1	forkhead box protein N1	NM_008238	11	78171790	78200060	2503	+		8	0.23	0.09		16	0.55	0.21		0	0	0		1	0.04	0.01
386	Ikzf3	zinc finger protein Aiolos	NM_011771	11	98326007	98407345	4098	+		8	0.23	0.05		27	0.93	0.22		110	5.1	1.24		2	0.09	0.02
387	Vmo1	vitelline membrane outer layer protein 1	NM_001013607	11	70327018	70328118	672	+		1	0.02	0.02		0	0	0		2	0.09	0.13		4	0.18	0.26
388	Olfr323	olfactory receptor 323	NM_146376	11	58438575	58439546	972	+		0	0	0		0	0	0		0	0	0		0	0	0
389	Myst2	histone acetyltransferase MYST2 isoform 2	NM_001195003, NM_001195004, NM_177619	11	95135573	95171515	3262	+		6750	197.7	60.6		5526	190.99	58.54		1108	51.37	15.74		6861	309.99	95.03
390	Luc7l3	luc7-like protein 3	NM_026313	11	94152453	94183225	3327	+		2698	79.02	23.75		1612	55.71	16.74		419	19.42	5.83		2936	132.65	39.87
391	Ugp2	UTP--glucose-1-phosphate uridylyltransferase	NM_139297	11	21221147	21270478	2675	+		287	8.4	3.14		285	9.85	3.68		1772	82.15	30.71		562	25.39	9.49
392	Abca8b	ATP-binding cassette sub-family A member 8-B	NM_013851	11	109795586	109857130	5335	+		5	0.14	0.02		6	0.2	0.03		31	1.43	0.26		9	0.4	0.07
393	Ube2o	ubiquitin-conjugating enzyme E2 O	NM_173755	11	116399067	116442761	5192	+		4445	130.19	25.07		4771	164.9	31.76		439	20.35	3.91		4185	189.08	36.41
394	1700020C11Rik	mitochondrial fission protein MTP18	NM_026443	11	3991484	3995434	1396	+		3	0.08	0.05		3	0.1	0.07		39	1.8	1.28		494	22.32	15.98
395	Bcl6b	B-cell CLL/lymphoma 6 member B protein	NM_007528	11	70037630	70043223	3348	+		3	0.08	0.02		9	0.31	0.09		13	0.6	0.17		52	2.34	0.69
396	Csf2	granulocyte-macrophage colony-stimulating factor	NM_009969	11	54060772	54063401	1033	+		0	0	0		0	0	0		0	0	0		0	0	0
397	Aipl1	aryl-hydrocarbon-interacting protein-like 1	NM_053245	11	71842224	71851011	1586	+		0	0	0		1	0.03	0.01		0	0	0		18	0.81	0.51
398	Ccl6	C-C motif chemokine 6 precursor	NM_009139	11	83401388	83406589	1436	+		15	0.43	0.29		26	0.89	0.61		3167	146.83	102.24		8	0.36	0.25
399	Cxcl16	C-X-C motif chemokine 16	NM_023158	11	70267736	70273486	2448	+		1	0.02	0		0	0	0		1069	49.56	20.24		51	2.3	0.93
400	Chac2	cation transport regulator-like protein 2	NM_026527	11	30876709	30886365	1328	+		110	3.22	2.42		116	4	3.01		55	2.55	1.92		53	2.39	1.79
401	Epx	eosinophil peroxidase precursor	NM_007946	11	87677500	87689038	2691	+		5	0.14	0.05		4	0.13	0.04		0	0	0		36	1.62	0.6
402	Il9r	interleukin-9 receptor isoform 1	NM_008374, NM_001134458	11	32088997	32100222	3020	+		6	0.17	0.05		3	0.1	0.03		26	1.2	0.39		0	0	0
403	Aatf	protein AATF	NM_019816	11	84236358	84327003	1844	+		2268	66.43	36.02		1465	50.63	27.45		417	19.33	10.48		1752	79.16	42.92
404	Kcnip1	Kv channel-interacting protein 1 isoform C	NM_001190886, NM_001190885, NM_027398	11	33529780	33743527	1783	+		172	5.03	2.82		114	3.94	2.2		98	4.54	2.54		2	0.09	0.05
405	Hmmr	hyaluronan mediated motility receptor	NM_013552	11	40515258	40546924	3539	+		430	12.59	3.55		275	9.5	2.68		39	1.8	0.5		2409	108.84	30.75
406	Atp5g1	ATP synthase lipid-binding protein,	NM_001161419, NM_007506	11	95930168	95936351	4675	+		41	1.2	0.25		69	2.38	0.5		38	1.76	0.37		245	11.06	2.36
407	Olfr30	olfactory receptor 30	NM_146878	11	58268502	58269449	948	+		0	0	0		0	0	0		0	0	0		0	0	0
408	Gabrp	gamma-aminobutyric acid receptor subunit pi	NM_146017	11	33450781	33478957	3280	+		332	9.72	2.96		245	8.46	2.57		420	19.47	5.93		69	3.11	0.94
409	Slc1a4	neutral amino acid transporter A	NM_018861	11	20202208	20232674	3885	+		14	0.41	0.1		30	1.03	0.26		136	6.3	1.62		1099	49.65	12.77
410	Ypel2	protein yippee-like 2	NM_001005341	11	86749927	86807264	4902	+		6551	191.88	39.14		4932	170.46	34.77		402	18.63	3.8		291	13.14	2.68
411	Grb2	growth factor receptor-bound protein 2	NM_008163	11	115505458	115569911	2624	+		703	20.59	7.84		787	27.2	10.36		3088	143.17	54.56		2401	108.48	41.34
412	Bod1	biorientation of chromosomes in cell division	NM_001024919	11	31565150	31571862	1408	+		8600	251.89	178.89		7034	243.11	172.66		544	25.22	17.91		906	40.93	29.06
413	Kat2a	histone acetyltransferase KAT2A isoform b	NM_020004, NM_001038010	11	100566062	100573768	3095	+		2176	63.73	20.59		2356	81.43	26.31		418	19.38	6.26		4084	184.52	59.61
414	Hlf	hepatic leukemia factor	NM_172563	11	90197849	90252231	5665	+		9	0.26	0.04		18	0.62	0.1		861	39.92	7.04		12	0.54	0.09
415	Grin2c	glutamate [NMDA] receptor subunit epsilon-3	NM_010350	11	115110483	115128557	4895	+		2	0.05	0.01		1	0.03	0		10	0.46	0.09		6	0.27	0.05
416		similar to ATP synthase, H+ transporting	NM_001112664	11	95934290	95936963	567	+		56	1.64	2.89		71	2.45	4.32		66	3.06	5.39		371	16.76	29.55
417	Gemin4	gemin 4	NM_177367	11	76024073	76031014	3424	+		33	0.96	0.28		35	1.2	0.35		360	16.69	4.87		1545	69.8	20.38
418	Nle1	notchless protein homolog 1	NM_145431	11	82714273	82721864	1784	+		460	13.47	7.55		353	12.2	6.83		99	4.59	2.57		672	30.36	17.01
419	Rps6kb1	ribosomal protein S6 kinase beta-1 isoform 1	NM_028259, NM_001114334	11	86312513	86358309	5395	+		1385	40.56	7.51		984	34.01	6.3		550	25.5	4.72		1473	66.55	12.33
420	Npm1	nucleophosmin	NM_008722	11	33052511	33063056	1259	+		8155	238.86	189.72		4436	153.32	121.77		1498	69.45	55.16		37151	1678.58	1333.26
421	Sec61g	SEC61, gamma subunit	NM_011343, NM_001109972, NM_001109971	11	16401641	16408487	779	+		1131	33.12	42.51		819	28.3	36.32		600	27.81	35.69		598	27.01	34.67
422	Pgam2	phosphoglycerate mutase 2	NM_018870	11	5701647	5703736	836	+		0	0	0		0	0	0		5755	266.83	319.17		75	3.38	4.04
423	Sgsh	N-sulfoglucosamine sulfohydrolase	NM_018822	11	119204803	119216824	4324	+		27	0.79	0.18		60	2.07	0.47		895	41.49	9.59		38	1.71	0.39
424	Gosr1	Golgi SNAP receptor complex member 1	NM_016810	11	76540104	76577057	4265	+		451	13.2	3.09		400	13.82	3.24		750	34.77	8.15		936	42.29	9.91
425	Wrap53	telomerase Cajal body protein 1	NM_144824	11	69375256	69392826	1896	+		6	0.17	0.08		14	0.48	0.25		101	4.68	2.46		772	34.88	18.39
426	1110002N22Rik	hypothetical protein LOC68550	NM_183275	11	79950180	79955655	1302	+		100	2.92	2.24		120	4.14	3.17		82	3.8	2.91		358	16.17	12.41
427	Doc2b	double C2-like domain-containing protein beta	NM_007873	11	75582592	75609559	4275	+		65	1.9	0.44		30	1.03	0.24		93	4.31	1		4	0.18	0.04
428	Olfr464	olfactory receptor 464	NM_146412	11	87727465	87728406	942	+		1	0.02	0.02		0	0	0		0	0	0		0	0	0
429	Notum	protein notum homolog precursor	NM_175263	11	120515119	120522151	2003	+		0	0	0		0	0	0		37	1.71	0.85		498	22.5	11.23
430	Slc13a5	solute carrier family 13 member 5	NM_001004148	11	72055585	72080106	3181	+		2	0.05	0.01		3	0.1	0.03		53	2.45	0.77		50	2.25	0.7
431	Cyb561	cytochrome b561	NM_007805	11	105795018	105805461	2474	+		195	5.71	2.3		211	7.29	2.94		11464	531.53	214.84		822	37.14	15.01
432	Canx	calnexin precursor	NM_007597, NM_001110500, NM_001110499	11	50107459	50139175	4292	+		14308	419.08	97.64		10223	353.34	82.32		10277	476.49	111.01		18499	835.83	194.74
433	Cep68	centrosomal protein of 68 kDa	NM_172260	11	20127040	20149427	4810	+		961	28.14	5.85		825	28.51	5.92		229	10.61	2.2		1110	50.15	10.42
434	Gemin5	gem-associated protein 5 isoform 1	NM_001166671, NM_001166670, NM_001166669, NM_172558	11	57934792	57981975	4856	+		515	15.08	3.1		533	18.42	3.79		477	22.11	4.55		4593	207.52	42.73
435	Stat5b	signal transducer and activator of transcription	NM_001113563, NM_011489	11	100642045	100711899	5255	+		11	0.32	0.06		7	0.24	0.04		867	40.19	7.64		258	11.65	2.21
436	Tmem88	transmembrane protein 88	NM_025915	11	69210021	69211736	1582	+		169	4.95	3.12		103	3.56	2.25		196	9.08	5.73		362	16.35	10.33
437	Slc16a13	monocarboxylate transporter 13	NM_172371	11	70030294	70034496	2528	+		1106	32.39	12.81		1094	37.81	14.95		86	3.98	1.57		49	2.21	0.87
438	4921536K21Rik	hypothetical protein LOC67430	NM_026150	11	3786091	3795101	2595	+		395	11.56	4.45		472	16.31	6.28		555	25.73	9.91		15	0.67	0.25
439	Ovca2	candidate tumor suppressor in ovarian cancer 2	NM_027136	11	74989445	74992310	2642	+		65	1.9	0.71		99	3.42	1.29		271	12.56	4.75		640	28.91	10.94
440	Ccdc85a	coiled-coil domain-containing protein 85A	NM_001166661, NM_181577	11	28288815	28484296	2301	+		25	0.73	0.31		26	0.89	0.38		9	0.41	0.17		86	3.88	1.68
441	Chrne	acetylcholine receptor subunit epsilon	NM_009603	11	70428385	70432696	1599	+		3	0.08	0.05		9	0.31	0.19		2533	117.44	73.44		3	0.13	0.08
442	Jup	junction plakoglobin	NM_010593	11	100231933	100259053	3226	+		1588	46.51	14.41		1340	46.31	14.35		1260	58.42	18.1		4181	188.9	58.55
443	1700001P01Rik	hypothetical protein LOC72215	NM_028156	11	97632795	97637232	639	+		1	0.02	0.03		2	0.06	0.09		60	2.78	4.35		40	1.8	2.81
444	Krt27	keratin, type I cytoskeletal 27	NM_010666	11	99206880	99212408	1539	+		11	0.32	0.2		10	0.34	0.22		0	0	0		0	0	0
445	Zfp354c	zinc finger protein 354C	NM_013922	11	50624587	50641233	5367	+		8	0.23	0.04		28	0.96	0.17		36	1.66	0.3		244	11.02	2.05
446	Olfr139	olfactory receptor 139	NM_147003	11	73857827	73858774	948	+		10	0.29	0.3		7	0.24	0.25		0	0	0		0	0	0
447	Olfr222	olfactory receptor 222	NM_001011789	11	59384284	59385240	957	+		0	0	0		0	0	0		0	0	0		0	0	0
448	9930111J21Rik1	interferon-inducible GTPase family member	NM_001114679	11	48759652	48792883	3863	+		0	0	0		0	0	0		12	0.55	0.14		0	0	0
449	Dlx4	homeobox protein DLX-4	NM_007867	11	95001770	95007577	2269	+		13	0.38	0.16		9	0.31	0.13		6	0.27	0.11		4	0.18	0.07
450	Ngfr	tumor necrosis factor receptor superfamily	NM_033217	11	95430140	95449012	3409	+		4	0.11	0.03		7	0.24	0.07		80	3.7	1.08		450	20.33	5.96
451	Klhl11	kelch-like protein 11 precursor	NM_172565	11	100323926	100334096	2436	+		136	3.98	1.63		194	6.7	2.75		206	9.55	3.92		728	32.89	13.5
452	Zfp2	zinc finger protein 2	NM_001044698, NM_001044700, NM_001044699, NM_001044697	11	50712214	50729663	3117	+		0	0	0		1	0.03	0		74	3.43	1.1		220	9.94	3.18
453	4930505A04Rik	hypothetical protein LOC75087	NM_001100394	11	30326006	30371829	944	+		9	0.26	0.27		3	0.1	0.1		658	30.5	32.3		0	0	0
454	Kpnb1	importin subunit beta-1	NM_008379	11	97021024	97049206	5909	+		15124	442.98	74.96		14095	487.16	82.44		3020	140.02	23.69		26072	1178	199.35
455	N4bp3	NEDD4-binding protein 3	NM_145974	11	51456591	51464575	2593	+		0	0	0		2	0.06	0.02		283	13.12	5.05		1632	73.73	28.43
456	1810046J19Rik	protein C17orf37 homolog	NM_025559	11	98299022	98300302	762	+		240	7.02	9.21		225	7.77	10.19		2215	102.69	134.76		829	37.45	49.14
457	Arhgap27	rho GTPase-activating protein 27 isoform 1	NM_133715	11	103192814	103206016	3512	+		5	0.14	0.03		2	0.06	0.01		356	16.5	4.69		146	6.59	1.87
458	Mrm1	rRNA methyltransferase 1, mitochondrial	NM_145433	11	84626563	84633017	2490	+		8	0.23	0.09		13	0.44	0.17		144	6.67	2.67		422	19.06	7.65
459	Krt35	keratin, type I cuticular Ha5	NM_016880	11	99953512	99957539	1737	+		8	0.23	0.13		14	0.48	0.27		23	1.06	0.61		0	0	0
460	Fat2	protocadherin Fat 2	NM_001029988	11	55064112	55125759	14423	+		33	0.96	0.06		18	0.62	0.04		144	6.67	0.46		7	0.31	0.02
461	Krtap1-3	keratin-associated protein 1-1	NM_001085526	11	99451777	99452653	879	+		0	0	0		0	0	0		0	0	0		0	0	0
462	Hnrnpab	heterogeneous nuclear ribonucleoprotein A/B	NM_010448, NM_001048061	11	51413602	51420383	2545	+		2310	67.66	26.58		2228	77	30.25		4988	231.26	90.86		23583	1065.54	418.67
463	Znrf3	zinc/RING finger protein 3 precursor	NM_001080924	11	5176332	5344850	6306	+		235	6.88	1.09		332	11.47	1.81		393	18.22	2.88		569	25.7	4.07
464	Tnfsf13	tumor necrosis factor ligand superfamily member	NM_001159505, NM_023517	11	69496079	69499056	1679	+		104	3.04	1.81		90	3.11	1.85		710	32.91	19.6		120	5.42	3.22
465	Sirt7	Sirt7	NM_153056	11	120479686	120486316	1715	+		1522	44.57	25.98		1257	43.44	25.32		391	18.12	10.56		324	14.63	8.53
466	Lyrm7	LYR motif-containing protein 7	NM_029327	11	54652791	54674093	2180	+		440	12.88	5.9		414	14.3	6.55		159	7.37	3.38		102	4.6	2.11
467	Nxn	nucleoredoxin	NM_008750	11	76070728	76212643	2728	+		713	20.88	7.65		672	23.22	8.51		1203	55.77	20.44		3681	166.31	60.96
468	Nefh	neurofilament heavy polypeptide	NM_010904	11	4838759	4848067	4004	+		1123	32.89	8.21		1206	41.68	10.4		13	0.6	0.14		310	14	3.49
469	Zfp454	zinc finger protein 454	NM_172794	11	50686225	50700945	2079	+		14	0.41	0.19		10	0.34	0.16		1	0.04	0.01		42	1.89	0.9
470	Top3a	DNA topoisomerase 3-alpha	NM_009410	11	60553561	60590867	3740	+		3165	92.7	24.78		3666	126.7	33.87		213	9.87	2.63		1041	47.03	12.57
471	1810049H13Rik	hypothetical protein LOC66431	NM_025560	11	120317918	120319377	810	+		2	0.05	0.06		1	0.03	0.03		53	2.45	3.02		42	1.89	2.33
472	Atox1	Atox1	NM_009720	11	55260145	55274640	501	+		551	16.13	32.19		435	15.03	30		2711	125.69	250.87		1299	58.69	117.14
473	Gm11435	hypothetical protein LOC629303	NM_001045543	11	83325238	83335677	1875	+		0	0	0		1	0.03	0.01		24	1.11	0.59		0	0	0
474	Itga3	integrin alpha-3	NM_013565	11	94905796	94938028	4870	+		17	0.49	0.1		12	0.41	0.08		580	26.89	5.52		1525	68.9	14.14
475	2310003H01Rik	Fanconi anemia-associated protein of 100 kDa	NM_027980	11	120230876	120240060	3175	+		856	25.07	7.89		895	30.93	9.74		426	19.75	6.22		410	18.52	5.83
476	2210407C18Rik	hypothetical protein LOC78354	NM_144544	11	58421708	58426972	866	+		0	0	0		0	0	0		0	0	0		0	0	0
477	Krt222	keratin-like protein KRT222	NM_172946	11	99094412	99105381	2735	+		12	0.35	0.12		10	0.34	0.12		5	0.23	0.08		3	0.13	0.04
478	C1ql1	C1q-related factor precursor	NM_011795	11	102801047	102807775	777	+		40	1.17	1.5		90	3.11	4		0	0	0		50	2.25	2.89
479	Lsm12	protein LSM12 homolog	NM_172947	11	102024803	102046570	1224	+		202	5.91	4.82		176	6.08	4.96		472	21.88	17.87		1355	61.22	50.01
480	Trim47	tripartite motif-containing protein 47	NM_172570	11	115967140	115971330	1897	+		36	1.05	0.55		35	1.2	0.63		186	8.62	4.54		66	2.98	1.57
481	Ube2b	ubiquitin-conjugating enzyme E2 B	NM_009458	11	51799064	51813889	1630	+		2692	78.84	48.36		1710	59.1	36.25		1081	50.12	30.74		2031	91.76	56.29
482	Ddx5	probable ATP-dependent RNA helicase DDX5	NM_007840	11	106641670	106649808	3520	+		4805	140.73	39.98		3995	138.08	39.22		4979	230.85	65.58		12474	563.6	160.11
483	Gm11564	hypothetical protein LOC670496	NM_001100614	11	99676290	99676980	691	+		0	0	0		0	0	0		0	0	0		1	0.04	0.05
484	Olfr43	olfactory receptor 43	NM_146711	11	74019775	74020716	942	+		0	0	0		0	0	0		0	0	0		0	0	0
485	Wipi1	WD repeat domain phosphoinositide-interacting	NM_145940	11	109434835	109472703	1817	+		670	19.62	10.79		507	17.52	9.64		700	32.45	17.85		294	13.28	7.3
486	Ccdc43	coiled-coil domain-containing protein 43	NM_025918	11	102546002	102559039	2307	+		18	0.52	0.22		14	0.48	0.2		196	9.08	3.93		1898	85.75	37.16
487	Timd2	T-cell immunoglobulin and mucin	NM_001161356, NM_001161355, NM_134249	11	46483516	46520556	1953	+		1	0.02	0.01		0	0	0		20	0.92	0.47		0	0	0
488	Srebf1	sterol regulatory element-binding protein 1	NM_011480	11	60012591	60034106	4299	+		4080	119.5	27.79		4670	161.41	37.54		1874	86.88	20.2		2250	101.66	23.64
489	Ahsa2	activator of 90 kDa heat shock protein ATPase	NM_172391	11	23387882	23397946	3604	+		3361	98.44	27.31		3303	114.16	31.67		827	38.34	10.63		1604	72.47	20.1
490	Olfr385	olfactory receptor 385	NM_147023	11	73402300	73403238	939	+		0	0	0		0	0	0		0	0	0		0	0	0
491	Hic1	hypermethylated in cancer 1 protein isoform 1	NM_010430, NM_001098203	11	74978067	74983757	4247	+		62	1.81	0.42		120	4.14	0.97		52	2.41	0.56		55	2.48	0.58
492	Dynll2	dynein light chain 2, cytoplasmic	NM_001168471, NM_001168472, NM_026556	11	87793035	87801007	2441	+		10948	320.66	131.36		9807	338.96	138.86		3584	166.17	68.07		6550	295.94	121.23
493	Slfn8	schlafen 8 isoform 2	NM_181545, NM_001167743	11	82815679	82834312	4017	+		10	0.29	0.07		9	0.31	0.07		199	9.22	2.29		5	0.22	0.05
494	Zkscan17	zinc finger protein 496 isoform 2	NM_001130529, NM_172941	11	59299064	59319414	3537	+		5306	155.41	43.93		4853	167.73	47.42		1471	68.2	19.28		2181	98.54	27.85
495	Krtap3-3	keratin-associated protein 3-2	NM_025524	11	99411446	99412177	732	+		0	0	0		0	0	0		0	0	0		0	0	0
496	1700093K21Rik	hypothetical protein LOC67358	NM_001110133, NM_026105	11	23416203	23419942	1338	+		165	4.83	3.6		117	4.04	3.01		284	13.16	9.83		1	0.04	0.02
497	Kif2b	kinesin-like protein KIF2B	NM_028547	11	91436600	91438869	2270	+		0	0	0		0	0	0		905	41.96	18.48		0	0	0
498	Pdk2	[Pyruvate dehydrogenase [lipoamide]] kinase	NM_133667	11	94887572	94902629	2243	+		75	2.19	0.97		73	2.52	1.12		2469	114.47	51.03		102	4.6	2.05
499	Neurod2	neurogenic differentiation factor 2	NM_010895	11	98186731	98190959	3137	+		0	0	0		0	0	0		0	0	0		0	0	0
500	Eftud2	116 kDa U5 small nuclear ribonucleoprotein	NM_011431, NM_001109995	11	102699786	102742289	3400	+		6455	189.06	55.6		5176	178.89	52.61		1277	59.2	17.41		10368	468.45	137.77
501	Dysfip1	dysferlin-interacting protein 1	NM_026814	11	120411289	120412446	775	+		1	0.02	0.02		5	0.17	0.21		8	0.37	0.47		0	0	0
502	Grb10	growth factor receptor-bound protein 10 isoform	NM_010345, NM_001177629	11	11830511	11937358	5015	+		1852	54.24	10.81		1840	63.59	12.67		194	8.99	1.79		1953	88.24	17.59
503	Cacna1g	calcium channel, voltage-dependent, T type,	NM_001177890, NM_001177888, NM_001112813, NM_009783	11	94269705	94335351	8077	+		60	1.75	0.21		63	2.17	0.26		24	1.11	0.13		10	0.45	0.05
504	Nudcd3	nudC domain-containing protein 3	NM_173748	11	6005709	6100165	3659	+		3691	108.11	29.54		5247	181.35	49.56		1363	63.19	17.26		3433	155.11	42.39
505	Slc13a2	solute carrier family 13 member 2	NM_022411	11	78210778	78235687	2191	+		3	0.08	0.03		3	0.1	0.04		128	5.93	2.7		6	0.27	0.12
506	Ptrf	polymerase I and transcript release factor	NM_008986	11	100818051	100831931	3218	+		66	1.93	0.59		139	4.8	1.49		1008	46.73	14.52		2055	92.85	28.85
507	Abcc3	canalicular multispecific organic anion	NM_029600	11	94204609	94254290	5002	+		1601	46.89	9.37		1905	65.84	13.16		1893	87.76	17.54		3	0.13	0.02
508	Med1	mediator of RNA polymerase II transcription	NM_134027, NM_013634, NM_001080118	11	98013469	98054607	6518	+		3919	114.78	17.6		3118	107.76	16.53		659	30.55	4.68		2302	104.01	15.95
509	Fbf1	fas-binding factor 1	NM_172571	11	116003599	116029492	5404	+		1314	38.48	7.12		1801	62.24	11.51		636	29.48	5.45		768	34.7	6.42
510	Cbx8	chromobox protein homolog 8	NM_013926	11	118899750	118902227	1413	+		30	0.87	0.61		43	1.48	1.04		51	2.36	1.67		35	1.58	1.11
511	Recql5	ATP-dependent DNA helicase Q5	NM_130454	11	115753991	115794320	3418	+		3507	102.72	30.05		3514	121.45	35.53		642	29.76	8.7		624	28.19	8.24
512	Tmem97	transmembrane protein 97	NM_133706	11	78355319	78364237	1333	+		2122	62.15	46.62		1589	54.92	41.2		724	33.56	25.17		892	40.3	30.23
513	Camta2	calmodulin-binding transcription activator 2	NM_001190376, NM_001190378, NM_001190379, NM_178116	11	70482968	70501436	4473	+		531	15.55	3.47		634	21.91	4.89		968	44.88	10.03		313	14.14	3.16
514	Smarcd2	SWI/SNF-related matrix-associated	NM_031878, NM_001130187	11	106124500	106128936	2379	+		9142	267.77	112.55		8218	284.04	119.39		1017	47.15	19.81		2132	96.32	40.48
515	Omg	oligodendrocyte-myelin glycoprotein	NM_019409	11	79314855	79317521	1794	+		0	0	0		2	0.06	0.03		0	0	0		0	0	0
516	Alox12e	arachidonate 12-lipoxygenase, epidermal-type	NM_145684	11	70129115	70136020	2309	+		0	0	0		2	0.06	0.02		9	0.41	0.17		3	0.13	0.05
517	Ltc4s	leukotriene C4 synthase	NM_008521	11	50049974	50051973	588	+		593	17.36	29.52		612	21.15	35.96		99	4.59	7.8		11	0.49	0.83
518	Pafah1b1	platelet-activating factor acetylhydrolase	NM_013625	11	74487457	74538172	5831	+		9095	266.39	45.68		6064	209.59	35.94		5385	249.67	42.81		5344	241.45	41.4
519	Nlrp1b	NLR family, pyrin domain containing 1B isoform	NM_001040696	11	70966604	71044235	4159	+		2	0.05	0.01		1	0.03	0		70	3.24	0.77		0	0	0
520	Npc1l1	Niemann-Pick C1-like protein 1 precursor	NM_207242	11	6111461	6130126	4002	+		0	0	0		0	0	0		5	0.23	0.05		4	0.18	0.04
521	Abca9	ATP-binding cassette sub-family A member 9	NM_147220	11	109962136	110029467	6268	+		354	10.36	1.65		212	7.32	1.16		221	10.24	1.63		0	0	0
522	Usp32	ubiquitin specific protease 32	NM_001029934	11	84797990	84953457	6978	+		2509	73.48	10.53		2732	94.42	13.53		1001	46.41	6.65		1373	62.03	8.88
523	Spns3	protein spinster homolog 3	NM_029932	11	72311658	72363748	1819	+		16	0.46	0.25		15	0.51	0.28		323	14.97	8.22		7	0.31	0.17
524	Qrich2	glutamine rich 2	NM_001033267	11	116302639	116315661	2162	+		213	6.23	2.88		153	5.28	2.44		1471	68.2	31.54		20	0.9	0.41
525	Dph1	diphthamide biosynthesis protein 1	NM_144491	11	74991145	75003985	2103	+		48	1.4	0.66		80	2.76	1.31		316	14.65	6.96		841	37.99	18.06
526	Supt6h	transcription elongation factor SPT6	NM_009297	11	78020251	78059205	6201	+		12778	374.27	60.35		12132	419.32	67.62		1988	92.17	14.86		7858	355.04	57.25
527	Krt31	keratin, type I cuticular Ha1	NM_010659	11	99907960	99911865	1581	+		0	0	0		1	0.03	0.01		11	0.51	0.32		0	0	0
528	Scn4a	sodium channel protein type 4 subunit alpha	NM_133199	11	106179907	106210704	6598	+		0	0	0		2	0.06	0		28	1.29	0.19		5	0.22	0.03
529	Lsm11	U7 snRNA-associated Sm-like protein LSm11	NM_028185	11	45741771	45758437	6453	+		1682	49.26	7.63		1346	46.52	7.2		102	4.72	0.73		374	16.89	2.61
530	Pfn1	profilin-1	NM_011072	11	70465351	70468137	853	+		6142	179.9	210.9		5221	180.45	211.54		12183	564.86	662.2		21761	983.22	1152.66
531	Plek	pleckstrin	NM_019549	11	16871451	16908705	3860	+		862	25.24	6.53		610	21.08	5.46		6694	310.36	80.4		7	0.31	0.08
532	Rap1gap2	rap1 GTPase-activating protein 2	NM_001015046	11	74196985	74403660	6410	+		542	15.87	2.47		1100	38.01	5.92		636	29.48	4.59		371	16.76	2.61
533	Cltc	clathrin heavy chain 1	NM_001003908	11	86508155	86570994	6178	+		20642	604.6	97.86		17337	599.22	96.99		8427	390.72	63.24		15219	687.63	111.3
534	Olfr392	olfactory receptor 392	NM_147006	11	73627644	73630379	1069	+		0	0	0		0	0	0		0	0	0		0	0	0
535	Mat2b	methionine adenosyltransferase 2 subunit beta	NM_134017	11	40492816	40506115	1801	+		31430	920.59	511.15		25811	892.11	495.34		797	36.95	20.51		1742	78.7	43.69
536	BC046404	leucine-rich repeat-containing protein C17orf76	NM_198861	11	62418386	62462025	2047	+		706	20.67	10.09		528	18.24	8.91		166	7.69	3.75		181	8.17	3.99
537	Alox8	arachidonate 15-lipoxygenase B	NM_009661	11	68997387	69011341	3269	+		4	0.11	0.03		3	0.1	0.03		0	0	0		3	0.13	0.03
538	Krt26	keratin, type I cytoskeletal 26	NM_001033397	11	99189798	99199278	2603	+		2	0.05	0.01		1	0.03	0.01		0	0	0		0	0	0
539	Pip4k2b	phosphatidylinositol-5-phosphate 4-kinase type-2	NM_054051	11	97576471	97606018	5068	+		489	14.32	2.82		445	15.38	3.03		714	33.1	6.53		2693	121.67	24
540	Cd300c	CMRF35-like molecule 6 precursor	NM_199225	11	114817592	114821731	690	+		75	2.19	3.17		90	3.11	4.5		4	0.18	0.26		0	0	0
541	Sarm1	sterile alpha and TIR motif-containing protein 1	NM_001168521, NM_172795	11	78286793	78311205	4102	+		61	1.78	0.43		111	3.83	0.93		21	0.97	0.23		77	3.47	0.84
542	Mpp3	MAGUK p55 subfamily member 3	NM_007863	11	101860967	101888269	2860	+		196	5.74	2		186	6.42	2.24		144	6.67	2.33		27	1.21	0.42
543	Tcn2	transcobalamin-2 precursor	NM_001130458, NM_015749, NM_001130459	11	3817193	3831586	1878	+		1174	34.38	18.3		1881	65.01	34.61		1126	52.2	27.79		332	15	7.98
544	Cacnb1	voltage-dependent L-type calcium channel subunit	NM_031173, NM_001159320, NM_145121, NM_001159319	11	97864215	97883956	1892	+		1	0.02	0.01		1	0.03	0.01		281	13.02	6.88		86	3.88	2.05
545	Meis1	homeobox protein Meis1 isoform B	NM_001193271, NM_010789	11	18780431	18918683	3057	+		9	0.26	0.08		17	0.58	0.18		76	3.52	1.15		16	0.72	0.23
546	Pitpnm3	membrane-associated phosphatidylinositol	NM_001024927, NM_001081641	11	71861030	71949391	6682	+		10	0.29	0.04		13	0.44	0.06		21	0.97	0.14		1	0.04	0
547	Senp3	sentrin-specific protease 3	NM_030702, NM_001163571	11	69486620	69495348	2310	+		1505	44.08	19.08		1778	61.45	26.6		628	29.11	12.6		6586	297.57	128.81
548	Papolg	poly(A) polymerase gamma	NM_172555	11	23762665	23795253	3727	+		4730	138.54	37.17		2997	103.58	27.79		103	4.77	1.27		512	23.13	6.2
549	Ctns	cystinosin	NM_031251	11	72996635	73012521	3010	+		628	18.39	6.1		692	23.91	7.94		674	31.25	10.38		291	13.14	4.36
550	Tlx3	T-cell leukemia homeobox protein 3	NM_019916	11	33101279	33103459	876	+		16	0.46	0.52		35	1.2	1.36		0	0	0		38	1.71	1.95
551	Nat9	N-acetyltransferase 9	NM_025400	11	115044146	115048630	1130	+		699	20.47	18.11		514	17.76	15.71		755	35	30.97		140	6.32	5.59
552	Olfr463	olfactory receptor 463	NM_146413	11	87706489	87707424	936	+		0	0	0		0	0	0		0	0	0		0	0	0
553	Mafg	transcription factor MafG	NM_010756	11	120489667	120494861	1720	+		560	16.4	9.53		525	18.14	10.54		483	22.39	13.01		1774	80.15	46.59
554	Cyb5d1	cytochrome b5 domain containing 1	NM_001045525	11	69207114	69208848	794	+		65	1.9	2.39		75	2.59	3.26		41	1.9	2.39		50	2.25	2.83
555	Stra13	centromere protein X	NM_016665	11	120572255	120575081	655	+		1693	49.58	75.69		1256	43.41	66.27		501	23.22	35.45		699	31.58	48.21
556	Hand1	heart- and neural crest derivatives-expressed	NM_008213	11	57642215	57645649	1898	+		0	0	0		0	0	0		3	0.13	0.06		1	0.04	0.02
557	Trp53i13	tumor protein p53-inducible protein 13	NM_001024920	11	77321601	77326775	1366	+		131	3.83	2.8		160	5.53	4.04		410	19	13.9		320	14.45	10.57
558	Krt17	keratin, type I cytoskeletal 17	NM_010663	11	100117531	100122303	1532	+		0	0	0		1	0.03	0.01		26	1.2	0.78		315	14.23	9.28
559	Hn1	hematological and neurological expressed 1	NM_008258	11	115358667	115375684	1384	+		3294	96.48	69.71		2849	98.47	71.14		2897	134.32	97.05		2234	100.93	72.92
560	Tnfaip1	BTB/POZ domain-containing adapter for	NM_009395, NM_001159392	11	78336352	78349696	3645	+		1850	54.18	14.86		1692	58.48	16.04		882	40.89	11.21		1639	74.05	20.31
561	Accn1	amiloride-sensitive cation channel 1, neuronal	NM_007384, NM_001034013	11	80693667	81781898	3022	+		36	1.05	0.34		36	1.24	0.41		217	10.06	3.32		20	0.9	0.29
562	Purb	transcriptional activator protein Pur-beta	NM_011221	11	6374785	6375920	1145	+		8	0.23	0.2		10	0.34	0.29		353	16.36	14.28		370	16.71	14.59
563	Prop1	homeobox protein prophet of Pit-1	NM_008936	11	50764308	50767134	1000	+		0	0	0		0	0	0		0	0	0		0	0	0
564	Xylt2	xylosyltransferase 2	NM_145828	11	94525161	94538807	3424	+		32	0.93	0.27		49	1.69	0.49		445	20.63	6.02		747	33.75	9.85
565	Acox1	peroxisomal acyl-coenzyme A oxidase 1	NM_015729	11	116033202	116060359	4065	+		656	19.21	4.72		713	24.64	6.06		1732	80.3	19.75		732	33.07	8.13
566	Stat3	signal transducer and activator of transcription	NM_011486, NM_213659, NM_213660	11	100748124	100800825	4487	+		7539	220.81	49.21		7407	256.01	57.05		2549	118.18	26.33		3771	170.38	37.97
567	Mtmr3	myotubularin-related protein 3	NM_028860	11	4380871	4494818	5691	+		3408	99.82	17.53		3904	134.93	23.7		1709	79.23	13.92		1702	76.9	13.51
568	Olfr329-ps	olfactory receptor 329	NM_001011531	11	58356020	58356958	939	+		0	0	0		0	0	0		0	0	0		0	0	0
569	Pttg1	securin isoform 1	NM_013917, NM_001131054	11	43233766	43239483	1683	+		17520	513.16	304.9		12324	425.95	253.08		452	20.95	12.44		1934	87.38	51.91
570	B3gntl1	UDP-GlcNAc:betaGal	NM_178664	11	121478086	121534453	2277	+		1509	44.19	19.4		1611	55.68	24.45		227	10.52	4.62		357	16.13	7.08
571	Cd68	macrosialin	NM_009853	11	69477873	69479564	1008	+		26	0.76	0.75		38	1.31	1.29		16644	771.7	765.57		135	6.09	6.04
572	4933400C05Rik	hypothetical protein LOC328019	NM_177801	11	103069441	103079746	1112	+		0	0	0		1	0.03	0.02		1929	89.43	80.42		0	0	0
573	Prorsd1	prdX-deacylase domain-containing protein 1	NM_026465, NM_001163454	11	29413055	29415033	739	+		77	2.25	3.04		55	1.9	2.57		143	6.63	8.97		136	6.14	8.3
574	Pctp	phosphatidylcholine transfer protein	NM_008796	11	89844731	89864208	1971	+		42	1.23	0.62		60	2.07	1.05		489	22.67	11.5		159	7.18	3.64
575	Rangrf	ran guanine nucleotide release factor	NM_021329	11	68785989	68787322	919	+		173	5.06	5.5		189	6.53	7.1		387	17.94	19.52		253	11.43	12.43
576	Epn2	epsin-2	NM_010148	11	61330751	61393153	4209	+		22873	669.95	159.17		18690	645.98	153.47		441	20.44	4.85		2296	103.73	24.64
577	Slfn9	schlafen 9	NM_172796	11	82793805	82805332	3856	+		4	0.11	0.02		3	0.1	0.02		49	2.27	0.58		504	22.77	5.9
578	Tnip1	TNFAIP3-interacting protein 1 isoform 2	NM_021327	11	54724289	54776414	2812	+		3258	95.42	33.93		3512	121.38	43.16		1083	50.21	17.85		1401	63.3	22.51
579	Tgtp1	T-cell specific GTPase	NM_011579	11	48798831	48805748	2809	+		0	0	0		0	0	0		0	0	0		48	2.16	0.76
580	Utp18	UTP18, small subunit processome component	NM_001013375	11	93720557	93747080	2613	+		4660	136.49	52.23		3549	122.66	46.94		288	13.35	5.1		2829	127.82	48.91
581		NLR family, pyrin domain containing 1C	NM_001039234	11	71055932	71098734	3457	+		25	0.73	0.21		7	0.24	0.06		19	0.88	0.25		0	0	0
582	Chd3	Chd3	NM_146019	11	69156775	69182928	7194	+		457	13.38	1.85		680	23.5	3.26		3190	147.9	20.55		950	42.92	5.96
583	Ccdc57	coiled-coil domain-containing protein 57	NM_027745	11	120687856	120794186	3437	+		234	6.85	1.99		214	7.39	2.15		705	32.68	9.5		149	6.73	1.95
584	Hormad2	HORMA domain-containing protein 2	NM_029458	11	4246386	4341085	1343	+		152	4.45	3.31		150	5.18	3.85		49	2.27	1.69		390	17.62	13.11
585	Tbx21	T-box transcription factor TBX21	NM_019507	11	96959386	96976589	2482	+		0	0	0		0	0	0		22	1.02	0.41		12	0.54	0.21
586	Ggnbp2	gametogenetin-binding protein 2	NM_153144	11	84645863	84684240	2967	+		277	8.11	2.73		254	8.77	2.95		1526	70.75	23.84		2400	108.43	36.54
587	Ncor1	nuclear receptor corepressor 1	NM_011308	11	62130192	62270834	8740	+		3338	97.77	11.18		2893	99.99	11.44		2302	106.73	12.21		4475	202.19	23.13
588	Wdr16	WD repeat-containing protein 16	NM_027963	11	67738308	67779144	2201	+		52	1.52	0.69		38	1.31	0.59		276	12.79	5.81		9	0.4	0.18
589	Fbxl20	F-box/LRR-repeat protein 20	NM_028149	11	97943868	98010930	8607	+		4860	142.35	16.53		3975	137.38	15.96		886	41.07	4.77		677	30.58	3.55
590	Aldh3a2	fatty aldehyde dehydrogenase	NM_007437	11	61058257	61080629	3131	+		1637	47.94	15.31		1526	52.74	16.84		1097	50.86	16.24		830	37.5	11.97
591	Leap2	liver-expressed antimicrobial peptide 2	NM_153069	11	53235683	53236638	497	+		0	0	0		0	0	0		0	0	0		0	0	0
592	Pipox	peroxisomal sarcosine oxidase	NM_008952	11	77694117	77707374	1774	+		92	2.69	1.51		48	1.65	0.93		36	1.66	0.93		1150	51.96	29.28
593	Foxj1	forkhead box protein J1	NM_008240	11	116192018	116196661	2592	+		2	0.05	0.01		1	0.03	0.01		149	6.9	2.66		55	2.48	0.95
594	Exoc7	exocyst complex component 7 isoform 2	NM_016857, NM_001162872	11	116150497	116167987	2094	+		488	14.29	6.82		515	17.8	8.5		642	29.76	14.21		561	25.34	12.1
595	Olfr317	olfactory receptor 317	NM_001011769	11	58545682	58546665	984	+		0	0	0		0	0	0		0	0	0		0	0	0
596	Cacng1	voltage-dependent calcium channel gamma-1	NM_007582	11	107564532	107577790	1225	+		9	0.26	0.21		9	0.31	0.25		4	0.18	0.14		0	0	0
597	Rmnd5b	protein RMD5 homolog B	NM_025346	11	51437175	51449398	1946	+		286	8.37	4.3		336	11.61	5.96		646	29.95	15.39		1555	70.25	36.09
598	Pld6	phospholipase D6	NM_183139	11	59597395	59601159	1769	+		270	7.9	4.46		323	11.16	6.3		26	1.2	0.67		226	10.21	5.77
599	0610009B22Rik	hypothetical protein LOC66050	NM_025319	11	51498887	51502136	795	+		1531	44.84	56.4		861	29.75	37.42		268	12.42	15.62		375	16.94	21.3
600	Fbll1	rRNA/tRNA 2'-O-methyltransferase	NM_001004147	11	35610882	35612386	1522	+		0	0	0		0	0	0		16	0.74	0.48		0	0	0
601	Tom1l1	TOM1-like protein 1	NM_028011	11	90507005	90548915	2093	+		2009	58.84	28.11		1404	48.52	23.18		101	4.68	2.23		608	27.47	13.12
602	Wwc1	protein KIBRA	NM_170779	11	35652680	35793591	3315	+		1230	36.02	10.86		832	28.75	8.67		1639	75.99	22.92		1962	88.64	26.73
603	Snap47	synaptosomal-associated protein 47	NM_144521	11	59220652	59263458	1837	+		3238	94.84	51.62		2754	95.18	51.81		473	21.93	11.93		1607	72.6	39.52
604	Tns4	tensin-4 precursor	NM_172564	11	98926995	98950616	4754	+		7	0.2	0.04		10	0.34	0.07		101	4.68	0.98		17	0.76	0.15
605	Olfr389	olfactory receptor 389	NM_147009	11	73589889	73590827	939	+		0	0	0		0	0	0		0	0	0		0	0	0
606	Gucy2e	guanylyl cyclase GC-E precursor	NM_008192	11	69036520	69050524	3430	+		1479	43.32	12.62		2254	77.9	22.71		1	0.04	0.01		2	0.09	0.02
607	Nt5c3l	cytosolic 5'-nucleotidase III-like protein	NM_001102650, NM_026561	11	100283635	100302403	1427	+		23	0.67	0.46		38	1.31	0.91		642	29.76	20.85		918	41.47	29.06
608	Sost	sclerostin precursor	NM_024449	11	101823850	101828329	1989	+		367	10.74	5.39		459	15.86	7.97		26	1.2	0.6		10	0.45	0.22
609	Prpsap2	phosphoribosyl pyrophosphate synthase-associated	NM_001164242, NM_144806, NM_001164243, NM_001164244	11	61543157	61575564	1857	+		2793	81.8	44.04		1672	57.78	31.11		122	5.65	3.04		813	36.73	19.77
610	Il13	interleukin-13 precursor	NM_008355	11	53444826	53448204	1206	+		25	0.73	0.6		16	0.55	0.45		4	0.18	0.14		0	0	0
611	Kremen1	kremen protein 1 precursor	NM_032396	11	5091556	5161613	4943	+		7353	215.37	43.57		6447	222.82	45.07		3955	183.37	37.09		686	30.99	6.26
612	Srcin1	SRC kinase signaling inhibitor 1	NM_018873	11	97370654	97436440	6965	+		14	0.41	0.05		14	0.48	0.06		540	25.03	3.59		274	12.38	1.77
613	Krtap4-7	keratin associated protein 4-7	NM_029613	11	99504426	99505403	978	+		0	0	0		0	0	0		0	0	0		0	0	0
614	Gm12185	hypothetical protein LOC620913	NM_001045540	11	48718158	48740661	5264	+		0	0	0		1	0.03	0		2	0.09	0.01		0	0	0
615	Pno1	RNA-binding protein PNO1	NM_025443	11	17103203	17111592	1578	+		1966	57.58	36.48		1697	58.65	37.16		447	20.72	13.13		2586	116.84	74.04
616	Thg1l	probable tRNA(His) guanylyltransferase	NM_001080969	11	45761656	45768996	939	+		683	20	21.29		465	16.07	17.11		200	9.27	9.87		687	31.04	33.05
617	Sdk2	protein sidekick-2 precursor	NM_172800	11	113642104	113927265	6604	+		11	0.32	0.04		6	0.2	0.03		261	12.1	1.83		26	1.17	0.17
618	Olfr1396	olfactory receptor 1396	NM_146337	11	48926279	48927259	981	+		0	0	0		0	0	0		0	0	0		0	0	0
619	Zfp287	zinc finger protein 287	NM_133208	11	62524988	62542595	5021	+		0	0	0		1	0.03	0		47	2.17	0.43		21	0.94	0.18
620	Sp2	transcription factor Sp2 isoform 2	NM_030220, NM_001080964	11	96814652	96839002	3056	+		433	12.68	4.14		453	15.65	5.12		326	15.11	4.94		1606	72.56	23.74
621	Eif5a	eukaryotic translation initiation factor 5A-1	NM_181582, NM_001166594, NM_001166593, NM_001166592, NM_001166591, NM_001166595, NM_001166596, NM_001166590, NM_001166589	11	69730224	69734843	1300	+		5631	164.93	126.86		4939	170.7	131.3		3704	171.73	132.1		26830	1212.25	932.5
622	Gsg2	serine/threonine-protein kinase haspin	NM_010353	11	72948987	72951796	2827	+		6466	189.39	66.99		4543	157.02	55.54		2335	108.26	38.29		716	32.35	11.44
623	Usp22	ubiquitin carboxyl-terminal hydrolase 22	NM_001004143	11	60965444	60988561	4280	+		428	12.53	2.92		760	26.26	6.13		1124	52.11	12.17		4616	208.56	48.72
624	Sgcd	delta-sarcoglycan b	NM_011891	11	46792285	47192804	1399	+		898	26.3	18.79		698	24.12	17.24		24	1.11	0.79		14	0.63	0.45
625	Ankfn1	ankyrin repeat and fibronectin type-III	NM_001080933	11	89282400	89399869	2238	+		1	0.02	0		0	0	0		70	3.24	1.44		0	0	0
626	Urgcp	up-regulator of cell proliferation isoform 1	NM_001077661, NM_178623	11	5613420	5662379	5531	+		14	0.41	0.07		33	1.14	0.2		561	26.01	4.7		470	21.23	3.83
627	Fasn	fatty acid synthase	NM_007988	11	120667272	120685861	9938	+		1127	33.01	3.32		1013	35.01	3.52		3251	150.73	15.16		14168	640.14	64.41
628	Pecam1	platelet endothelial cell adhesion molecule	NM_008816, NM_001032378	11	106515532	106576595	3305	+		2740	80.25	24.28		2511	86.78	26.25		91	4.21	1.27		2595	117.24	35.47
629	Wfikkn2	WAP, kazal, immunoglobulin, kunitz and NTR	NM_181819	11	94098912	94103863	1716	+		1	0.02	0.01		0	0	0		7	0.32	0.18		10	0.45	0.26
630	0610010K14Rik	MLL1/MLL complex subunit C17orf49 homolog	NM_001177601, NM_001177603, NM_001177606, NM_001177607, NM_026757, NM_145758	11	70048710	70051416	776	+		1455	42.61	54.9		1285	44.41	57.22		292	13.53	17.43		1971	89.05	114.75
631	Eif4a1	eukaryotic initiation factor 4A-I isoform 2	NM_001159375, NM_144958	11	69480441	69485817	1771	+		5618	164.55	92.91		4807	166.14	93.81		2888	133.9	75.6		16938	765.3	432.12
632	Sgsm2	small G protein signaling modulator 2	NM_197943	11	74662766	74710582	4791	+		1405	41.15	8.58		1650	57.02	11.9		724	33.56	7		773	34.92	7.28
633	Ubtf	nucleolar transcription factor 1 isoform 2	NM_001044383, NM_011551	11	102165874	102180410	4704	+		524	15.34	3.26		917	31.69	6.73		2043	94.72	20.13		9666	436.73	92.84
634	Fam20a	family with sequence similarity 20, member A	NM_153782	11	109534240	109583570	2614	+		3	0.08	0.03		2	0.06	0.02		206	9.55	3.65		4	0.18	0.06
635	Ccdc157	coiled-coil domain-containing protein 157	NM_177616, NM_001164620	11	4041127	4060296	5153	+		259	7.58	1.47		261	9.02	1.75		382	17.71	3.43		164	7.4	1.43
636		pre-acrosome localization protein 1 isoform 2	NM_001109658, NM_009734	11	119925744	119948141	3592	+		1043	30.54	8.5		1049	36.25	10.09		230	10.66	2.96		673	30.4	8.46
637	Evi2a	protein EVI2A precursor	NM_010161, NM_001033711	11	79340063	79344111	2316	+		2	0.05	0.02		1	0.03	0.01		1114	51.65	22.3		3	0.13	0.05
638	Olfr223	olfactory receptor 223	NM_146429	11	59402630	59403589	960	+		0	0	0		0	0	0		0	0	0		0	0	0
639	Ddc	aromatic-L-amino-acid decarboxylase	NM_016672	11	11714106	11790404	1947	+		1	0.02	0.01		2	0.06	0.03		127	5.88	3.02		554	25.03	12.85
640	Slc25a11	mitochondrial 2-oxoglutarate/malate carrier	NM_024211	11	70457699	70460495	1652	+		464	13.59	8.22		362	12.51	7.57		1425	66.07	39.99		1139	51.46	31.15
641	Btbd17	BTB/POZ domain-containing protein 17	NM_028055	11	114651983	114657206	2260	+		463	13.56	6		457	15.79	6.98		3	0.13	0.05		10	0.45	0.19
642	Mrps24	28S ribosomal protein S24, mitochondrial	NM_026080	11	5603986	5607702	1007	+		989	28.96	28.75		1012	34.97	34.72		356	16.5	16.38		1497	67.63	67.15
643	Rffl	E3 ubiquitin-protein ligase rififylin isoform 2	NM_026097, NM_001164569, NM_001164571, NM_001164570, NM_001007465	11	82617324	82684246	3575	+		3674	107.61	30.1		3518	121.59	34.01		1076	49.88	13.95		965	43.6	12.19
644	Jmjd6	bifunctional arginine demethylase and	NM_033398	11	116698746	116704763	1688	+		3115	91.23	54.04		2272	78.52	46.51		611	28.32	16.77		1918	86.66	51.33
645	Hus1	checkpoint protein HUS1	NM_008316	11	8893145	8911140	4581	+		6403	187.54	40.93		4461	154.18	33.65		166	7.69	1.67		1786	80.69	17.61
646	Tex19.2	testis-expressed protein 19.2	NM_027622	11	120977531	120979991	2061	+		112	3.28	1.59		268	9.26	4.49		21	0.97	0.47		53	2.39	1.15
647	Gabra1	gamma-aminobutyric acid receptor subunit alpha-1	NM_010250	11	41944982	41996432	4147	+		4	0.11	0.02		3	0.1	0.02		0	0	0		1	0.04	0
648	Slc4a1	band 3 anion transport protein	NM_011403	11	102210141	102226429	4375	+		0	0	0		2	0.06	0.01		5	0.23	0.05		5	0.22	0.05
649	Cdc27	Cdc27	NM_145436	11	104363843	104411934	5783	+		9508	278.49	48.15		6995	241.76	41.8		836	38.76	6.7		2119	95.74	16.55
650	Slc39a11	zinc transporter ZIP11 isoform 1	NM_027216, NM_001166503	11	113106169	113427075	2667	+		303	8.87	3.32		281	9.71	3.64		1258	58.32	21.86		567	25.61	9.6
651	Mpdu1	mannose-P-dolichol utilization defect 1 protein	NM_011900	11	69470206	69476144	1314	+		13	0.38	0.28		20	0.69	0.52		1184	54.89	41.77		1672	75.54	57.48
652	Hist3h2bb-ps	histone H2B type 3-B	NM_206882	11	58767550	58768014	465	+		1	0.02	0.04		3	0.1	0.21		0	0	0		0	0	0
653	Pigw	phosphatidylinositol-glycan biosynthesis class W	NM_001077636, NM_027388	11	84689815	84693787	2677	+		62	1.81	0.67		102	3.52	1.31		69	3.19	1.19		150	6.77	2.52
654	Med24	mediator of RNA polymerase II transcription	NM_011869	11	98565905	98590749	3427	+		1940	56.82	16.58		2243	77.52	22.62		753	34.91	10.18		2294	103.64	30.24
655	Wbp2	WW domain-binding protein 2	NM_016852	11	115939887	115948278	1795	+		2118	62.03	34.55		2134	73.75	41.08		2542	117.86	65.66		2941	132.88	74.02
656	Krt40	keratin, type I cytoskeletal 40	NM_001039666	11	99398799	99404472	1320	+		0	0	0		0	0	0		0	0	0		0	0	0
657	Nmur2	neuromedin-U receptor 2	NM_153079	11	55838492	55854489	3276	+		0	0	0		0	0	0		0	0	0		0	0	0
658	Spag7	sperm-associated antigen 7 isoform 2	NM_001167669, NM_172561	11	70477292	70482795	1017	+		2113	61.89	60.85		1797	62.11	61.07		647	29.99	29.48		1973	89.14	87.64
659	Usp43	ubiquitin carboxyl-terminal hydrolase 43	NM_173754	11	67668025	67735655	4462	+		2056	60.22	13.49		2116	73.13	16.38		131	6.07	1.36		360	16.26	3.64
660	Nploc4	nuclear protein localization protein 4 homolog	NM_199469, NM_001195023	11	120241685	120298982	4008	+		10861	318.12	79.37		10352	357.79	89.26		1450	67.22	16.77		2812	127.05	31.69
661	Hspa4	heat shock 70 kDa protein 4	NM_008300	11	53073316	53113981	4657	+		8905	260.82	56		9250	319.71	68.65		2789	129.31	27.76		23074	1042.54	223.86
662	Cd7	T-cell antigen CD7 precursor	NM_009854	11	120898065	120900732	978	+		4104	120.2	122.9		1427	49.32	50.42		79	3.66	3.74		0	0	0
663	Krt14	keratin, type I cytoskeletal 14	NM_016958	11	100064476	100068824	1680	+		0	0	0		0	0	0		347	16.08	9.57		10	0.45	0.26
664	Acsf2	acyl-CoA synthetase family member 2,	NM_153807	11	94418416	94463100	3069	+		79	2.31	0.75		164	5.66	1.84		62	2.87	0.93		322	14.54	4.73
665	Vat1	synaptic vesicle membrane protein VAT-1 homolog	NM_012037	11	101320062	101327513	2732	+		995	29.14	10.66		1147	39.64	14.5		18984	880.19	322.17		3884	175.48	64.23
666	Uqcr10	cytochrome b-c1 complex subunit 9	NM_197979	11	4601971	4604347	444	+		641	18.77	42.27		504	17.41	39.21		1554	72.05	162.27		3476	157.05	353.71
667	Gm11937	hypothetical protein LOC100041488	NM_001099346	11	99471108	99471503	396	+		0	0	0		0	0	0		0	0	0		0	0	0
668	Dcakd	dephospho-CoA kinase domain-containing protein	NM_026551	11	102855370	102878461	1714	+		5848	171.28	99.92		5726	197.9	115.46		450	20.86	12.17		5370	242.63	141.55
669	Krt34	keratin, type I cuticular Ha4	NM_027563	11	99898665	99902868	1605	+		0	0	0		0	0	0		0	0	0		0	0	0
670	Polr2a	DNA-directed RNA polymerase II subunit RPB1	NM_009089	11	69547912	69571725	5799	+		2130	62.38	10.75		2491	86.09	14.84		3045	141.18	24.34		12161	549.46	94.75
671	Fignl1	fidgetin-like protein 1	NM_001163360, NM_001163359, NM_021891	11	11700291	11708935	2935	+		2127	62.3	21.22		1819	62.87	21.42		70	3.24	1.1		3085	139.38	47.48
672	Sec24a	protein transport protein Sec24A	NM_175255	11	51505765	51570336	6798	+		966	28.29	4.16		843	29.13	4.28		561	26.01	3.82		838	37.86	5.56
673	Tnfsf12	tumor necrosis factor ligand superfamily member	NM_011614	11	69499850	69509256	1239	+		120	3.51	2.83		121	4.18	3.37		1216	56.38	45.5		82	3.7	2.98
674	Olfr380	olfactory receptor 380	NM_147025	11	73266777	73267712	936	+		0	0	0		0	0	0		0	0	0		0	0	0
675	Fam114a2	hypothetical protein LOC67726 isoform 1	NM_026342, NM_001168668, NM_001168667	11	57296502	57332117	2552	+		899	26.33	10.31		710	24.53	9.61		539	24.99	9.79		1630	73.64	28.85
676	Tada2a	transcriptional adapter 2-alpha	NM_172562	11	83892422	83943070	2119	+		1550	45.39	21.42		1102	38.08	17.97		168	7.78	3.67		1844	83.31	39.31
677	Sectm1a	secreted and transmembrane protein 1A precursor	NM_145373	11	120928717	120942453	1615	+		27	0.79	0.48		8	0.27	0.16		16	0.74	0.45		0	0	0
678	Ulk2	serine/threonine-protein kinase ULK2	NM_013881	11	61589162	61668119	5275	+		572	16.75	3.17		431	14.89	2.82		6481	300.49	56.96		125	5.64	1.06
679	Akap10	A-kinase anchor protein 10, mitochondrial	NM_019921	11	61684809	61743728	3848	+		3935	115.25	29.95		3737	129.16	33.56		736	34.12	8.86		779	35.19	9.14
680	Rab5c	ras-related protein Rab-5C	NM_024456	11	100576580	100599444	1587	+		5363	157.08	98.97		4938	170.67	107.54		5645	261.73	164.92		3571	161.34	101.66
681	Zfp879	zinc finger protein 879	NM_173387	11	50645537	50655054	2408	+		30	0.87	0.36		17	0.58	0.24		4	0.18	0.07		3	0.13	0.05
682	Dusp3	dual specificity phosphatase 3	NM_028207	11	101835473	101846084	1167	+		0	0	0		0	0	0		1183	54.85	47		82	3.7	3.17
683	Ddx56	probable ATP-dependent RNA helicase DDX56	NM_026538	11	6157548	6167732	3287	+		3698	108.31	32.95		2977	102.89	31.3		603	27.95	8.5		2420	109.34	33.26
684	Tbkbp1	TANK-binding kinase 1-binding protein 1	NM_198100	11	96997485	97011026	3358	+		6	0.17	0.05		11	0.38	0.11		178	8.25	2.45		328	14.81	4.41
685	Ccdc55	coiled-coil domain-containing protein 55	NM_001012309	11	76857794	76891937	3114	+		3791	111.03	35.65		2670	92.28	29.63		340	15.76	5.06		934	42.2	13.55
686	BC017643	hypothetical protein LOC217370	NM_144832	11	121083903	121090579	2439	+		18	0.52	0.21		38	1.31	0.53		716	33.19	13.6		418	18.88	7.74
687	Dgke	diacylglycerol kinase epsilon	NM_019505	11	88898896	88922062	5208	+		1174	34.38	6.6		1375	47.52	9.12		200	9.27	1.77		798	36.05	6.92
688	Krt42	keratin, type I cytoskeletal 42	NM_212483	11	100124196	100131185	1547	+		10	0.29	0.18		7	0.24	0.15		0	0	0		766	34.6	22.36
689	Trim65	tripartite motif-containing protein 65	NM_178802	11	115986022	115992442	3050	+		47	1.37	0.44		28	0.96	0.31		130	6.02	1.97		8	0.36	0.11
690	Pyy	peptide YY precursor	NM_145435	11	101967991	101969090	511	+		0	0	0		0	0	0		0	0	0		0	0	0
691	Med31	mediator of RNA polymerase II transcription	NM_026068	11	72025226	72029094	1179	+		777	22.75	19.29		436	15.06	12.77		122	5.65	4.79		408	18.43	15.63
692	Krtap17-1	keratin-associated protein 17-1	NM_001099774	11	99854548	99855308	761	+		0	0	0		0	0	0		0	0	0		0	0	0
693	Dusp14	dual specificity protein phosphatase 14	NM_019819	11	83861547	83881859	1443	+		3656	107.08	74.2		3610	124.77	86.46		41	1.9	1.31		380	17.16	11.89
694	Rel	relish, isoform D	NM_009044	11	23641729	23670970	2584	+		243	7.11	2.75		204	7.05	2.72		74	3.43	1.32		46	2.07	0.8
695	Srp68	Srp68	NM_146032	11	116106480	116135531	2546	+		1612	47.21	18.54		1406	48.59	19.08		1068	49.51	19.44		3255	147.06	57.76
696	Rps27a	ribosomal protein S27A	NM_024277, NM_001033865	11	29445842	29448040	821	+		784	22.96	27.96		501	17.31	21.08		2503	116.05	141.35		6480	292.78	356.61
697	Krt19	keratin, type I cytoskeletal 19	NM_008471	11	100002126	100007233	1509	+		0	0	0		0	0	0		2263	104.92	69.52		94	4.24	2.8
698	Ftsj3	putative rRNA methyltransferase 3	NM_025310	11	106110458	106117116	2865	+		6090	178.37	62.25		4596	158.85	55.44		713	33.05	11.53		7968	360.01	125.65
699	Shbg	sex hormone-binding globulin precursor	NM_011367	11	69428318	69431370	1369	+		1	0.02	0.01		1	0.03	0.02		3	0.13	0.09		0	0	0
700	Calcoco2	calcium-binding and coiled-coil	NM_029755, NM_001100177	11	95960640	95973276	1556	+		0	0	0		1	0.03	0.01		0	0	0		1070	48.34	31.06
701	Rad51l3	DNA repair protein RAD51 homolog 4	NM_011235	11	82686567	82704117	7062	+		2142	62.73	8.88		1286	44.44	6.29		417	19.33	2.73		391	17.66	2.5
702	Cct6b	T-complex protein 1 subunit zeta-2	NM_009839	11	82532752	82577808	1787	+		24	0.7	0.39		10	0.34	0.19		1242	57.58	32.22		23	1.03	0.57
703	Atxn7l3	ataxin-7-like protein 3 isoform a	NM_001098836, NM_001098837	11	102150614	102157943	3723	+		4	0.11	0.02		23	0.79	0.21		1093	50.67	13.6		3391	153.21	41.15
704	Appbp2	amyloid protein-binding protein 2	NM_025825	11	85004812	85048622	2407	+		2111	61.83	25.68		1685	58.23	24.19		477	22.11	9.18		2328	105.18	43.69
705	Slc22a21	solute carrier family 22 member 21	NM_019723	11	53764326	53793529	2297	+		15	0.43	0.18		17	0.58	0.25		261	12.1	5.26		18	0.81	0.35
706	Ccng1	cyclin-G1	NM_009831	11	40562054	40568788	3501	+		181	5.3	1.51		192	6.63	1.89		1726	80.02	22.85		4051	183.03	52.27
707	Ccdc47	coiled-coil domain containing 47	NM_026009	11	106060670	106077681	3270	+		5450	159.63	48.81		3276	113.22	34.62		987	45.76	13.99		1754	79.25	24.23
708	2011-03-10	membrane-associated ring finger 10 isoform 1	NM_001039242	11	105262968	105318038	1276	+		68	1.99	1.55		63	2.17	1.7		4008	185.83	145.63		0	0	0
709	1110036O03Rik	synaptonemal complex protein SC65	NM_176830	11	100270064	100276133	1903	+		1	0.02	0.01		5	0.17	0.08		139	6.44	3.38		170	7.68	4.03
710	Smtnl2	smoothelin-like protein 2	NM_177776	11	72203616	72225215	2624	+		1	0.02	0		0	0	0		111	5.14	1.95		2655	119.96	45.71
711	Abca6	ATP-binding cassette sub-family A member 6	NM_147218, NM_001166556	11	110038136	110113042	5194	+		10	0.29	0.05		1	0.03	0		39	1.8	0.34		1	0.04	0
712	Efnb3	ephrin-B3 precursor	NM_007911	11	69367627	69373680	3125	+		0	0	0		8	0.27	0.08		8	0.37	0.11		241	10.88	3.48
713	Timp2	metalloproteinase inhibitor 2	NM_011594	11	118162375	118216725	3635	+		18	0.52	0.14		24	0.82	0.22		10475	485.67	133.6		374	16.89	4.64
714	Olfr330	olfactory receptor 330	NM_146879	11	58342539	58343486	948	+		0	0	0		0	0	0		0	0	0		0	0	0
715	Slc36a3	proton-coupled amino acid transporter 3	NM_172258	11	54938325	54965208	1758	+		0	0	0		0	0	0		17	0.78	0.44		3	0.13	0.07
716	Prkca	protein kinase C alpha type	NM_011101	11	107794701	108205202	8385	+		132	3.86	0.46		79	2.73	0.32		677	31.38	3.74		54	2.43	0.28
717	Smtn	smoothelin	NM_013870, NM_001159284	11	3417526	3439242	3306	+		4	0.11	0.03		8	0.27	0.08		384	17.8	5.38		1163	52.54	15.89
718	Eml6	echinoderm microtubule-associated protein-like	NM_146016	11	29643051	29926033	8080	+		1735	50.81	6.28		1835	63.42	7.84		396	18.36	2.27		43	1.94	0.24
719	Krtap4-2	keratin associated protein 4-2	NM_026807	11	99495428	99496398	971	+		0	0	0		0	0	0		0	0	0		0	0	0
720	C1qbp	complement component 1 Q subcomponent-binding	NM_007573	11	70791348	70796528	1177	+		1677	49.11	41.72		1643	56.78	48.24		715	33.15	28.16		9257	418.25	355.35
721	Slc47a1	multidrug and toxin extrusion protein 1	NM_026183	11	61156902	61191577	2634	+		90	2.63	0.99		52	1.79	0.67		2	0.09	0.03		50	2.25	0.85
722	Wnt9b	protein Wnt-9b precursor	NM_011719	11	103588677	103611135	4521	+		1	0.02	0		0	0	0		0	0	0		0	0	0
723	Serpinf1	pigment epithelium-derived factor	NM_011340	11	75223531	75236125	1497	+		0	0	0		4	0.13	0.08		255	11.82	7.89		165	7.45	4.97
724	Cd300e	CMRF35-like molecule 2	NM_172050	11	114913231	114923352	1963	+		4	0.11	0.05		1	0.03	0.01		0	0	0		2	0.09	0.04
725	Olfr395	olfactory receptor 395	NM_147005	11	73720054	73720992	939	+		0	0	0		0	0	0		0	0	0		0	0	0
726	Krt33a	keratin, type I cuticular Ha3-I	NM_027983	11	99872513	99877526	1679	+		0	0	0		0	0	0		0	0	0		0	0	0
727	Nf2	merlin	NM_010898	11	4665851	4749530	4708	+		4246	124.36	26.41		4095	141.53	30.06		2197	101.86	21.63		3882	175.39	37.25
728	Smarce1	SWI/SNF-related matrix-associated	NM_020618	11	99070362	99092331	2960	+		1710	50.08	16.91		1264	43.68	14.75		422	19.56	6.6		1228	55.48	18.74
729	Stc2	stanniocalcin-2 precursor	NM_011491	11	31259441	31270061	1793	+		263	7.7	4.29		137	4.73	2.63		33	1.53	0.85		439	19.83	11.05
730	Tns3	tensin-3	NM_001083587	11	8331655	8564538	7483	+		90	2.63	0.35		183	6.32	0.84		3362	155.88	20.83		5291	239.06	31.94
731	Pcyt2	ethanolamine-phosphate cytidylyltransferase	NM_024229	11	120471401	120479204	1908	+		116	3.39	1.77		83	2.86	1.49		444	20.58	10.78		897	40.52	21.23
732	Krt39	keratin, type I cytoskeletal 39	NM_213730	11	99375938	99382572	1449	+		0	0	0		0	0	0		10	0.46	0.31		0	0	0
733	Drg1	developmentally-regulated GTP-binding protein 1	NM_007879	11	3149925	3166389	1524	+		1495	43.78	28.72		1194	41.26	27.07		957	44.37	29.11		3271	147.79	96.97
734	Mxra7	matrix-remodeling-associated protein 7	NM_026280	11	116664718	116689360	1720	+		8	0.23	0.13		17	0.58	0.33		184	8.53	4.95		284	12.83	7.45
735	Acadvl	very long-chain specific acyl-CoA dehydrogenase,	NM_017366	11	69823694	69828909	2158	+		274	8.02	3.71		221	7.63	3.53		567	26.28	12.17		623	28.14	13.03
736	Cdk5rap3	CDK5 regulatory subunit-associated protein 3	NM_030248	11	96769100	96777795	1892	+		348	10.19	5.38		352	12.16	6.42		962	44.6	23.57		2405	108.66	57.43
737	4931440F15Rik	protein fem-1 homolog A-B	NM_176829	11	29722395	29725668	3274	+		1	0.02	0		8	0.27	0.08		117	5.42	1.65		0	0	0
738	Icam2	intercellular adhesion molecule 2 precursor	NM_010494	11	106238970	106243955	1168	+		0	0	0		0	0	0		95	4.4	3.76		7	0.31	0.26
739	Olfr328	olfactory receptor 328	NM_146502	11	58364807	58365739	933	+		0	0	0		0	0	0		0	0	0		0	0	0
740	Gabrg2	gamma-aminobutyric acid receptor subunit gamma-2	NM_008073, NM_177408	11	41723697	41814180	3511	+		35	1.02	0.29		32	1.1	0.31		0	0	0		13	0.58	0.16
741		tumor necrosis factor (ligand) superfamily	NM_001034098, NM_001034097	11	69496079	69509499	2134	+		228	6.67	3.12		222	7.67	3.59		2036	94.39	44.23		211	9.53	4.46
742	Arf1	ADP-ribosylation factor 1	NM_007476, NM_001130408	11	59024915	59041689	1785	+		7054	206.61	115.74		6212	214.7	120.28		3477	161.21	90.31		4118	186.06	104.23
743	St6galnac2	alpha-N-acetylgalactosaminide	NM_009180	11	116538019	116555974	2033	+		145	4.24	2.08		114	3.94	1.93		126856	5881.71	2893.11		127	5.73	2.81
744	Aspa	aspartoacylase	NM_023113	11	73118490	73138136	1534	+		0	0	0		0	0	0		9	0.41	0.26		16	0.72	0.46
745	Lrrc46	leucine-rich repeat-containing protein 46	NM_027026	11	96895916	96902683	1338	+		110	3.22	2.4		78	2.69	2.01		2395	111.04	82.98		25	1.12	0.83
746	Cacng4	voltage-dependent calcium channel gamma-4	NM_019431	11	107596094	107655778	984	+		271	7.93	8.05		188	6.49	6.59		93	4.31	4.38		25	1.12	1.13
747	Zfp672	zinc finger protein 672	NM_178761	11	58128718	58136615	3098	+		224	6.56	2.11		185	6.39	2.06		608	28.19	9.09		26	1.17	0.37
748	Glp2r	glucagon-like peptide 2 receptor precursor	NM_175681	11	67519932	67584655	4897	+		0	0	0		0	0	0		12	0.55	0.11		0	0	0
749	Top2a	DNA topoisomerase 2-alpha	NM_011623	11	98854261	98885503	5217	+		5277	154.56	29.62		3436	118.75	22.76		273	12.65	2.42		18001	813.33	155.89
750	Cabp7	calcium-binding protein 7	NM_138948	11	4638824	4646781	699	+		1	0.02	0.02		2	0.06	0.08		1	0.04	0.05		44	1.98	2.83
751	Tbrg4	protein TBRG4	NM_001130457, NM_134011	11	6516426	6526026	2332	+		571	16.72	7.16		580	20.04	8.59		590	27.35	11.72		3575	161.52	69.26
752	Cd300lf	CMRF35-like molecule 1 isoform 2 precursor	NM_001169153, NM_145634	11	114977532	114995271	1834	+		710	20.79	11.33		411	14.2	7.74		2232	103.48	56.42		4	0.18	0.09
753	Psmc3ip	homologous-pairing protein 2 homolog	NM_008949	11	100953471	100956715	948	+		849	24.86	26.22		662	22.88	24.13		226	10.47	11.04		585	26.43	27.87
754	Dus1l	tRNA-dihydrouridine synthase 1-like	NM_026824	11	120650516	120657709	1909	+		766	22.43	11.74		813	28.09	14.71		629	29.16	15.27		2169	98	51.33
755	Traf4	TNF-receptor-associated factor 4, isoform D	NM_009423	11	77970813	77979029	4106	+		3797	111.21	27.08		3240	111.98	27.27		160	7.41	1.8		2753	124.38	30.29
756	Olfr378	olfactory receptor 378	NM_147024	11	73238539	73239483	945	+		0	0	0		0	0	0		0	0	0		0	0	0
757	Ccr7	C-C chemokine receptor type 7 precursor	NM_007719	11	99005513	99016391	1975	+		0	0	0		0	0	0		100	4.63	2.34		2	0.09	0.04
758	Commd1	COMM domain-containing protein 1	NM_144514	11	22799728	22882284	818	+		2565	75.12	91.83		1591	54.99	67.22		765	35.46	43.34		2120	95.78	117.09
759	4932411E22Rik	hypothetical protein LOC214604	NM_172534	11	89251537	89280262	2665	+		1	0.02	0		0	0	0		54	2.5	0.93		0	0	0
760	Fgf11	fibroblast growth factor 11	NM_010198	11	69611704	69615127	678	+		1	0.02	0.02		2	0.06	0.08		4	0.18	0.26		31	1.4	2.06
761	Etv4	ETS translocation variant 4	NM_008815	11	101631056	101646624	2336	+		59	1.72	0.73		48	1.65	0.7		24	1.11	0.47		2838	128.22	54.88
762	Mdh1	malate dehydrogenase, cytoplasmic	NM_008618	11	21456790	21471833	1758	+		2260	66.19	37.65		1779	61.48	34.97		3822	177.2	100.79		3144	142.05	80.8
763	Ccl1	C-C motif chemokine 1	NM_011329	11	81990168	81993314	507	+		5	0.14	0.27		4	0.13	0.25		0	0	0		0	0	0
764	Dhx33	putative ATP-dependent RNA helicase DHX33	NM_178367	11	70797593	70817934	5179	+		833	24.39	4.7		940	32.48	6.27		372	17.24	3.32		1610	72.74	14.04
765	Atp5h	ATP synthase subunit d, mitochondrial	NM_027862	11	115277011	115281233	574	+		1538	45.04	78.46		1022	35.32	61.53		1019	47.24	82.29		1595	72.06	125.54
766	Derl2	derlin-2	NM_033562	11	70820947	70832765	3623	+		1360	39.83	10.99		1204	41.61	11.48		879	40.75	11.24		709	32.03	8.84
767	Csnk1d	casein kinase I isoform delta isoform 1	NM_139059, NM_027874	11	120823055	120852647	3749	+		1872	54.83	14.62		2000	69.12	18.43		4023	186.52	49.75		4520	204.22	54.47
768	Tmem49	transmembrane protein 49	NM_029478	11	86397367	86497324	2773	+		1939	56.79	20.47		1814	62.69	22.6		2078	96.34	34.74		4859	219.54	79.17
769	Efcab9	EF-hand calcium-binding domain-containing	NM_027031	11	32422751	32427579	752	+		0	0	0		0	0	0		96	4.45	5.91		0	0	0
770	Caskin2	caskin-2	NM_080643	11	115660666	115674906	4762	+		2408	70.53	14.81		1572	54.33	11.4		219	10.15	2.13		618	27.92	5.86
771	Krtap1-4	keratin-associated protein 1-5	NM_001039502	11	99443863	99444991	1129	+		0	0	0		0	0	0		0	0	0		0	0	0
772	Ranbp17	ran-binding protein 17	NM_023146	11	33112419	33413626	4291	+		1358	39.77	9.26		1051	36.32	8.46		282	13.07	3.04		1354	61.17	14.25
773	Fam195b	hypothetical protein LOC192173	NM_001033231	11	120404202	120411041	1286	+		5	0.14	0.1		35	1.2	0.93		1051	48.72	37.88		558	25.21	19.6
774	Tmed4	transmembrane emp24 domain-containing protein 4	NM_134020	11	6170717	6174840	1645	+		103	3.01	1.82		73	2.52	1.53		1396	64.72	39.34		724	32.71	19.88
775	Ppm1e	protein phosphatase 1E	NM_177167	11	87040408	87172496	6315	+		386	11.3	1.78		274	9.47	1.49		163	7.55	1.19		148	6.68	1.05
776	Arl5c	ADP-ribosylation factor-like protein 5C	NM_207231	11	97850894	97857487	1616	+		42	1.23	0.76		21	0.72	0.44		157	7.27	4.49		91	4.11	2.54
777	Ccdc104	coiled-coil domain-containing protein 104	NM_025740	11	29121536	29147272	1523	+		1050	30.75	20.19		651	22.5	14.77		587	27.21	17.86		529	23.9	15.69
778	Slc47a2	multidrug and toxin extrusion protein 2	NM_001033542	11	61115133	61156362	2377	+		297	8.69	3.65		97	3.35	1.4		29	1.34	0.56		27	1.21	0.5
779	Cntrob	centrobin	NM_172560	11	69112998	69137375	3950	+		1788	52.37	13.25		1508	52.12	13.19		109	5.05	1.27		1185	53.54	13.55
780	Camk2b	calcium/calmodulin-dependent protein kinase type	NM_007595, NM_001174053, NM_001174054	11	5869675	5965751	3995	+		23	0.67	0.16		10	0.34	0.08		1035	47.98	12.01		1193	53.9	13.49
781	Slc5a10	sodium/glucose cotransporter 5	NM_001033227	11	61486284	61534301	2261	+		10365	303.59	134.27		11486	396.99	175.58		30	1.39	0.61		262	11.83	5.23
782	Olfr376	olfactory receptor 376 isoform 1	NM_001172686, NM_146922	11	73188253	73189206	954	-		0	0	0		0	0	0		0	0	0		0	0	0
783	Grn	granulins	NM_008175	11	102291821	102298119	2144	-		1931	56.55	26.37		1255	43.37	20.22		23407	1085.27	506.18		3497	158	73.69
784	Metrnl	meteorin-like protein precursor	NM_144797	11	121563741	121578703	2468	-		4	0.11	0.04		3	0.1	0.04		1358	62.96	25.51		25	1.12	0.45
785	Dhrs13	dehydrogenase/reductase SDR family member 13	NM_183286	11	77845815	77851366	1744	-		358	10.48	6		399	13.79	7.9		37	1.71	0.98		267	12.06	6.91
786	Ttc19	tetratricopeptide repeat protein 19 isoform 2	NM_029704, NM_028360	11	62094975	62129926	3419	-		433	12.68	3.7		437	15.1	4.41		192	8.9	2.6		538	24.3	7.1
787	Dhx8	ATP-dependent RNA helicase DHX8	NM_144831	11	101594270	101628671	4344	-		5776	169.18	38.94		3342	115.51	26.59		914	42.37	9.75		2872	129.76	29.87
788	Olfr1386	olfactory receptor 1386	NM_001011741	11	49283655	49284584	930	-		0	0	0		0	0	0		0	0	0		0	0	0
789	Il5	interleukin-5	NM_010558	11	53534296	53538605	1534	-		2	0.05	0.03		4	0.13	0.08		0	0	0		0	0	0
790	Olfr1384	olfactory receptor 1384	NM_146472	11	49327142	49328098	957	-		0	0	0		0	0	0		0	0	0		0	0	0
791	Shroom1	protein Shroom1	NM_027917	11	53270707	53281257	3301	-		4	0.11	0.03		3	0.1	0.03		162	7.51	2.27		2	0.09	0.02
792	Scarf1	scavenger receptor class F, member 1	NM_001004157	11	75327043	75340082	2884	-		0	0	0		0	0	0		93	4.31	1.49		42	1.89	0.65
793	Abhd15	abhydrolase domain-containing protein 15	NM_026185	11	77328619	77334130	3249	-		8	0.23	0.07		18	0.62	0.19		22	1.02	0.31		5	0.22	0.06
794	1100001G20Rik	WDNM1-like protein	NM_183249	11	83560442	83566148	452	-		22	0.64	1.41		5	0.17	0.37		0	0	0		0	0	0
795	Ubb	polyubiquitin-B	NM_011664	11	62365006	62366714	1165	-		11141	326.32	280.1		8105	280.13	240.45		5543	257	220.6		6698	302.63	259.76
796	Olfr316	olfactory receptor 316	NM_001011818	11	58571169	58572089	921	-		2	0.05	0.05		4	0.13	0.14		11	0.51	0.55		4	0.18	0.19
797	Hist3h2a	histone H2A type 3	NM_178218	11	58768187	58770176	1990	-		79	2.31	1.16		158	5.46	2.74		457	21.18	10.64		14	0.63	0.31
798	Myh1	myosin, heavy polypeptide 1, skeletal muscle,	NM_030679	11	67013616	67038077	6058	-		65	1.9	0.31		35	1.2	0.19		0	0	0		0	0	0
799	Vdac1	voltage-dependent anion-selective channel	NM_011694	11	52174617	52202898	1766	-		1731	50.7	28.7		1308	45.2	25.59		2694	124.9	70.72		13621	615.43	348.48
800	Gal3st1	galactosylceramide sulfotransferase	NM_016922, NM_001177703, NM_001177691	11	3883716	3899317	1918	-		17	0.49	0.25		31	1.07	0.55		4	0.18	0.09		21	0.94	0.49
801		angiotensin I converting enzyme	NM_001101453	11	105856045	105866757	2253	-		0	0	0		0	0	0		84	3.89	1.72		1	0.04	0.01
802	Tnfrsf13b	tumor necrosis factor receptor superfamily	NM_021349	11	60954337	60961144	750	-		0	0	0		2	0.06	0.08		47	2.17	2.89		1	0.04	0.05
803	Asb16	ankyrin repeat and SOCS box protein 16	NM_148953	11	102130137	102139375	1362	-		12	0.35	0.25		13	0.44	0.32		2	0.09	0.06		28	1.26	0.92
804	Morc2a	MORC family CW-type zinc finger protein 2A	NM_001159288, NM_198162	11	3558703	3590375	4443	-		2071	60.66	13.65		1889	65.28	14.69		523	24.24	5.45		3235	146.16	32.89
805	Selm	selenoprotein M precursor	NM_053267	11	3414705	3417354	888	-		17	0.49	0.55		25	0.86	0.96		451	20.91	23.54		387	17.48	19.68
806	Stard3	stAR-related lipid transfer protein 3	NM_021547	11	98219698	98242412	2054	-		68	1.99	0.96		127	4.38	2.13		1019	47.24	22.99		533	24.08	11.72
807	Hist3h2ba	histone H2B type 3-A	NM_030082	11	58762413	58763032	622	-		82	2.4	3.85		78	2.69	4.32		4	0.18	0.28		2	0.09	0.14
808	Olfr1380	olfactory receptor 1380	NM_207573	11	49377425	49378360	936	-		0	0	0		0	0	0		0	0	0		0	0	0
809	Xaf1	XIAP-associated factor 1	NM_001037713	11	72115131	72127235	2621	-		1	0.02	0		7	0.24	0.09		123	5.7	2.17		355	16.03	6.11
810	Olfr325	olfactory receptor 325	NM_207153	11	58394366	58395328	963	-		0	0	0		0	0	0		0	0	0		0	0	0
811	Hoxb6	homeobox protein Hox-B6	NM_008269	11	96160485	96162883	1344	-		0	0	0		0	0	0		677	31.38	23.34		0	0	0
812	Pld2	phospholipase D2	NM_008876	11	70353666	70371612	3801	-		2413	70.67	18.59		2152	74.38	19.56		427	19.79	5.2		129	5.82	1.53
813	Tlk2	serine/threonine-protein kinase tousled-like 2	NM_001112705, NM_011903	11	105042844	105145270	5475	-		2781	81.45	14.87		2295	79.32	14.48		1773	82.2	15.01		2537	114.62	20.93
814	Fam83g	hypothetical protein LOC69640	NM_178618	11	61497912	61523452	4786	-		10180	298.17	62.3		11171	386.1	80.67		21	0.97	0.2		255	11.52	2.4
815	Aff4	AF4/FMR2 family member 4	NM_033565	11	53164335	53235332	10118	-		597	17.48	1.72		614	21.22	2.09		2511	116.42	11.5		5097	230.29	22.76
816	Tac4	tachykinin-4 precursor	NM_053093	11	95122843	95130575	1248	-		1	0.02	0.01		3	0.1	0.08		3	0.13	0.1		5	0.22	0.17
817	Nufip2	nuclear fragile X mental retardation-interacting	NM_001024205	11	77499657	77531468	10383	-		3926	114.99	11.07		2544	87.92	8.46		592	27.44	2.64		6015	271.77	26.17
818	Mpo	myeloperoxidase precursor	NM_010824	11	87607086	87617897	2740	-		142	4.15	1.51		65	2.24	0.81		26	1.2	0.43		0	0	0
819	Ppp3r1	calcineurin subunit B type 1	NM_024459	11	17059301	17100383	2829	-		6126	179.43	63.42		4689	162.06	57.28		1449	67.18	23.74		2493	112.64	39.81
820	Rab34	ras-related protein Rab-34	NM_033475, NM_001159482	11	78002336	78005690	1646	-		9	0.26	0.15		4	0.13	0.07		561	26.01	15.8		492	22.22	13.49
821	Wipf2	WAS/WASL-interacting protein family member 2	NM_197940	11	98725123	98764834	5334	-		460	13.47	2.52		515	17.8	3.33		467	21.65	4.05		1381	62.39	11.69
822	Trim58	tripartite motif-containing protein 58	NM_001039047	11	58453967	58465906	2192	-		0	0	0		0	0	0		0	0	0		0	0	0
823	Gsdma3	gasdermin-A3	NM_001007461	11	98487674	98499403	1477	-		0	0	0		0	0	0		0	0	0		0	0	0
824	Rab1	Rab-protein 1	NM_008996	11	20101605	20126859	2657	-		873	25.57	9.62		722	24.95	9.39		3176	147.25	55.41		6197	279.99	105.37
825	Mtmr4	myotubularin-related protein 4	NM_133215	11	87405719	87429798	5710	-		5912	173.16	30.32		5468	188.99	33.09		1649	76.45	13.38		1311	59.23	10.37
826	Pik3ip1	phosphoinositide-3-kinase-interacting protein 1	NM_178149	11	3230734	3242974	2267	-		306	8.96	3.95		365	12.61	5.56		409	18.96	8.36		86	3.88	1.71
827	Hint1	histidine triad nucleotide-binding protein 1	NM_008248	11	54679940	54683998	576	-		3426	100.34	174.2		2198	75.97	131.89		2502	116	201.38		5582	252.21	437.86
828	Snrnp25	U11/U12 small nuclear ribonucleoprotein 25 kDa	NM_030093	11	32105415	32108984	821	-		288	8.43	10.26		186	6.42	7.81		144	6.67	8.12		766	34.6	42.14
829	Olfr401	olfactory receptor 401	NM_146706	11	73934793	73935740	948	-		0	0	0		0	0	0		0	0	0		0	0	0
830	Peli1	pellino homolog 1	NM_023324	11	20991327	21050330	3501	-		3407	99.79	28.5		3558	122.97	35.12		416	19.28	5.5		1385	62.57	17.87
831	Rhbdl3	rhomboid-related protein 3	NM_139228	11	80114578	80169457	3593	-		4	0.11	0.03		4	0.13	0.03		41	1.9	0.52		24	1.08	0.3
832	Nags	N-acetylglutamate synthase, mitochondrial	NM_145829, NM_178053	11	102006901	102010790	1708	-		1	0.02	0.01		1	0.03	0.01		18	0.83	0.48		9	0.4	0.23
833	Hsd17b1	estradiol 17-beta-dehydrogenase 1	NM_010475	11	100939725	100941819	1317	-		34	0.99	0.75		39	1.34	1.01		1	0.04	0.03		12	0.54	0.41
834	Cbx2	chromobox protein homolog 2	NM_007623	11	118884343	118892584	3754	-		7424	217.45	57.92		8305	287.04	76.46		33	1.53	0.4		890	40.21	10.71
835	Nlrp3	NACHT, LRR and PYD domains-containing protein 3	NM_145827	11	59356188	59380458	4021	-		25	0.73	0.18		30	1.03	0.25		45	2.08	0.51		7	0.31	0.07
836	Ddx52	probable ATP-dependent RNA helicase DDX52	NM_030096	11	83755680	83775692	2215	-		940	27.53	12.42		634	21.91	9.89		242	11.22	5.06		1123	50.74	22.9
837	Eno3	beta-enolase isoform 2	NM_001136062, NM_007933	11	70471298	70476015	1506	-		2	0.05	0.03		5	0.17	0.11		203	9.41	6.24		454	20.51	13.61
838	Tmem106a	transmembrane protein 106A	NM_144830	11	101443556	101453099	2301	-		219	6.41	2.78		200	6.91	3		1881	87.21	37.9		176	7.95	3.45
839	Slc35b1	solute carrier family 35 member B1	NM_016752	11	95246236	95252966	1169	-		1267	37.11	31.74		879	30.38	25.98		996	46.17	39.49		818	36.95	31.6
840	Slc16a5	monocarboxylate transporter 6	NM_001080934	11	115323787	115335712	3020	-		21	0.61	0.2		16	0.55	0.18		4	0.18	0.05		21	0.94	0.31
841	Llgl2	lethal(2) giant larvae protein homolog 2	NM_145438	11	115685372	115717094	3557	-		2352	68.89	19.36		1553	53.67	15.08		1304	60.46	16.99		4585	207.16	58.24
842	Rasl10a	ras-like protein family member 10A precursor	NM_145216	11	4958131	4960386	1108	-		3	0.08	0.07		7	0.24	0.21		313	14.51	13.09		42	1.89	1.7
843	Rptor	raptor	NM_028898	11	119464309	119760905	6956	-		514	15.05	2.16		703	24.29	3.49		857	39.73	5.71		1895	85.62	12.3
844	Ddx42	ATP-dependent RNA helicase DDX42	NM_028074	11	106078240	106110454	4028	-		2561	75.01	18.62		2346	81.08	20.12		1056	48.96	12.15		3909	176.61	43.84
845	Phospho1	phosphoethanolamine/phosphocholine phosphatase	NM_153104	11	95685814	95693137	1593	-		90	2.63	1.65		115	3.97	2.49		10311	478.07	300.1		358	16.17	10.15
846	Psmc5	26S protease regulatory subunit 8	NM_008950	11	106117499	106124426	1277	-		5452	159.69	125.05		4037	139.53	109.26		1602	74.27	58.15		7727	349.12	273.39
847	Mpg	DNA-3-methyladenine glycosylase	NM_010822	11	32126511	32132700	1751	-		195	5.71	3.26		212	7.32	4.18		316	14.65	8.36		327	14.77	8.43
848	Pla2g3	phospholipase A2, group III	NM_172791	11	3388230	3394169	2642	-		15	0.43	0.16		12	0.41	0.15		5	0.23	0.08		1	0.04	0.01
849	Rpl27	ribosomal protein L27	NM_011289	11	101303729	101306841	536	-		42	1.23	2.29		45	1.55	2.89		89	4.12	7.68		1850	83.58	155.93
850	Timd4	T-cell immunoglobulin and mucin	NM_178759	11	46624301	46657835	2175	-		1147	33.59	15.44		1104	38.15	17.54		73	3.38	1.55		1	0.04	0.01
851	Myl4	myosin light chain 4	NM_010858	11	104411977	104448533	883	-		845	24.75	28.02		528	18.24	20.65		231	10.71	12.12		138	6.23	7.05
852	Cntnap1	contactin-associated protein 1 precursor	NM_016782	11	101037431	101052034	5360	-		6679	195.62	36.49		7099	245.36	45.77		35	1.62	0.3		3	0.13	0.02
853	Sar1b	GTP-binding protein SAR1b	NM_025535	11	51577209	51605423	1206	-		2289	67.04	55.58		1427	49.32	40.89		898	41.63	34.51		903	40.8	33.83
854	C1qtnf1	complement C1q tumor necrosis factor-related	NM_019959	11	118295167	118311277	2512	-		0	0	0		6	0.2	0.07		81	3.75	1.49		12	0.54	0.21
855	BC017647	hypothetical protein LOC216971	NM_145430	11	77908175	77970841	3884	-		6201	181.62	46.76		5588	193.13	49.72		354	16.41	4.22		757	34.2	8.8
856	Bhlha9	class A basic helix-loop-helix protein 9	NM_177182	11	76485972	76487178	1311	-		1	0.02	0.01		0	0	0		0	0	0		1	0.04	0.03
857	Cdkn2aipnl	CDKN2AIP N-terminal-like protein	NM_029976	11	51781165	51790838	1853	-		1447	42.38	22.87		1490	51.49	27.78		500	23.18	12.5		2039	92.12	49.71
858	Pus10	putative tRNA pseudouridine synthase Pus10	NM_028956, NM_001033654, NM_028304	11	23565674	23632876	3590	-		301	8.81	2.45		387	13.37	3.72		326	15.11	4.2		1042	47.08	13.11
859	Eif1	eukaryotic translation initiation factor 1	NM_011508	11	100181310	100183410	1242	-		2542	74.45	59.94		2036	70.37	56.65		5151	238.82	192.28		5169	233.54	188.03
860	Rnf215	RING finger protein 215	NM_027859	11	4035163	4041195	1953	-		412	12.06	6.17		308	10.64	5.44		134	6.21	3.17		128	5.78	2.95
861	Tspan10	tetraspanin-10	NM_145363	11	120304007	120308264	1646	-		0	0	0		0	0	0		6	0.27	0.16		0	0	0
862	Fn3k	fructosamine-3-kinase isoform b	NM_001038699, NM_022014	11	121296282	121311798	3863	-		4	0.11	0.02		1	0.03	0		11	0.51	0.13		0	0	0
863	Gdf9	growth/differentiation factor 9 precursor	NM_008110	11	53246788	53251404	1805	-		153362	4492.01	2488.64		146986	5080.31	2814.57		126	5.84	3.23		9	0.4	0.22
864	Klhl10	kelch-like protein 10	NM_025727	11	100303238	100318338	2012	-		1	0.02	0		2	0.06	0.02		17854	827.8	411.43		32	1.44	0.71
865	Gna13	guanine nucleotide-binding protein subunit	NM_010303	11	109224108	109262683	6217	-		2958	86.64	13.93		2381	82.29	13.23		3675	170.39	27.4		3510	158.59	25.5
866	Mybbp1a	myb-binding protein 1A	NM_016776	11	72254880	72265052	4215	-		1348	39.48	9.36		1595	55.12	13.07		1603	74.32	17.63		20944	946.3	224.5
867	Hoxb7	homeobox protein Hox-B7	NM_010460	11	96147960	96151477	1269	-		1	0.02	0.01		4	0.13	0.1		666	30.87	24.32		2	0.09	0.07
868	Alkbh5	probable alpha-ketoglutarate-dependent	NM_172943	11	60351185	60372014	6025	-		26091	764.21	126.83		24672	852.74	141.53		2447	113.45	18.82		4917	222.16	36.87
869	Arsg	arylsulfatase G isoform 1 precursor	NM_001166177, NM_028710	11	109351194	109434643	2982	-		192	5.62	1.88		98	3.38	1.13		316	14.65	4.91		34	1.53	0.51
870	Gnb2l1	guanine nucleotide-binding protein subunit	NM_008143	11	48613862	48619743	1254	-		3191	93.46	74.52		2615	90.38	72.07		13875	643.31	513		48244	2179.79	1738.26
871	Jmjd4	jmjC domain-containing protein 4	NM_178659	11	59263590	59271570	3903	-		57	1.66	0.42		87	3	0.76		140	6.49	1.66		470	21.23	5.43
872	Smg6	Smg6	NM_001002764	11	74739374	74977950	5817	-		3009	88.13	15.15		2705	93.49	16.07		1023	47.43	8.15		1811	81.82	14.06
873	Zmiz2	zinc finger, MIZ-type containing 2	NM_028601, NM_001005867	11	6289367	6306165	4203	-		3349	98.09	23.33		4688	162.03	38.55		5414	251.02	59.72		4277	193.24	45.97
874	Myh8	myosin-8	NM_177369	11	67090626	67122135	6149	-		0	0	0		0	0	0		0	0	0		2	0.09	0.01
875	Adora2b	adenosine receptor A2b	NM_007413	11	62062486	62079954	1844	-		173	5.06	2.74		233	8.05	4.36		35	1.62	0.87		42	1.89	1.02
876	Spred2	sprouty-related, EVH1 domain-containing protein	NM_033523	11	19824445	19922600	2872	-		456	13.35	4.64		739	25.54	8.89		286	13.26	4.61		1363	61.58	21.44
877	Heatr6	HEAT repeat-containing protein 6	NM_145432	11	83567139	83597256	5677	-		3309	96.92	17.07		3049	105.38	18.56		264	12.24	2.15		703	31.76	5.59
878	Olfr1387	olfactory receptor 1387	NM_146473	11	49273183	49274118	936	-		0	0	0		0	0	0		0	0	0		0	0	0
879	Otop2	otopetrin-2	NM_172801	11	115168477	115193617	2350	-		1	0.02	0		3	0.1	0.04		17	0.78	0.33		1	0.04	0.01
880	Igfbp1	insulin-like growth factor-binding protein 1	NM_008341	11	7097790	7102549	1522	-		12	0.35	0.22		5	0.17	0.11		0	0	0		0	0	0
881	Tmem107	transmembrane protein 107 isoform 1	NM_025838, NM_028336	11	68884313	68886794	1263	-		486	14.23	11.26		307	10.61	8.4		107	4.96	3.92		273	12.33	9.76
882	Fmnl1	formin-like protein 1 isoform 2	NM_019679, NM_001077698	11	103032452	103060214	3873	-		33	0.96	0.24		40	1.38	0.35		653	30.27	7.81		94	4.24	1.09
883	Sez6	seizure related 6 homolog	NM_021286	11	77744445	77792544	4096	-		39	1.14	0.27		46	1.58	0.38		8	0.37	0.09		16	0.72	0.17
884	Mgat5b	alpha-1,6-mannosylglycoprotein	NM_172948	11	116780177	116848258	4277	-		3	0.08	0.01		1	0.03	0		0	0	0		421	19.02	4.44
885	4933422H20Rik	tripartite motif protein 47-like	NM_001033775	11	115301859	115309582	1932	-		39	1.14	0.59		52	1.79	0.92		485	22.48	11.63		3	0.13	0.06
886	Specc1	cytospin-B	NM_001029936	11	61890599	62036515	6676	-		36	1.05	0.15		84	2.9	0.43		1129	52.34	7.84		394	17.8	2.66
887	Efcab3	EF-hand calcium-binding domain-containing	NM_001081046	11	104953533	104978851	1744	-		654	19.15	10.98		624	21.56	12.36		277	12.84	7.36		1	0.04	0.02
888	Rnf145	RING finger protein 145 isoform 2	NM_001166553, NM_028862	11	44332466	44379018	3566	-		1148	33.62	9.42		1105	38.19	10.7		1141	52.9	14.83		1662	75.09	21.05
889	Efemp1	EGF-containing fibulin-like extracellular matrix	NM_146015	11	28753205	28826743	2036	-		17	0.49	0.24		6	0.2	0.09		254	11.77	5.78		81	3.65	1.79
890	Rprml	reprimo-like protein	NM_001033212	11	103510823	103511894	1072	-		0	0	0		0	0	0		7	0.32	0.29		2	0.09	0.08
891	Rnf167	E3 ubiquitin-protein ligase RNF167 precursor	NM_027445	11	70461091	70464916	1538	-		1302	38.13	24.79		1540	53.22	34.6		605	28.05	18.23		1008	45.54	29.6
892	Atp2a3	sarcoplasmic/endoplasmic reticulum calcium	NM_016745, NM_001163337, NM_001163336	11	72774757	72806541	4537	-		2	0.05	0.01		1	0.03	0		725	33.61	7.4		389	17.57	3.87
893	Coil	coilin	NM_016706	11	88835249	88852927	2609	-		55	1.61	0.61		171	5.91	2.26		1818	84.29	32.3		2400	108.43	41.55
894	Adap2	arf-GAP with dual PH domain-containing protein	NM_172133	11	79967664	79992329	1611	-		0	0	0		1	0.03	0.01		482	22.34	13.86		106	4.78	2.96
895	Gria1	glutamate receptor 1 isoform 2 precursor	NM_008165, NM_001113325	11	56825193	57143746	5682	-		9	0.26	0.04		2	0.06	0.01		14	0.64	0.11		1	0.04	0
896	Chad	chondroadherin precursor	NM_007689	11	94426388	94430441	1653	-		0	0	0		0	0	0		1	0.04	0.02		1	0.04	0.02
897	Dcaf7	DDB1- and CUL4-associated factor 7	NM_027946	11	105898186	105920637	5765	-		9878	289.32	50.18		9451	326.65	56.66		2600	120.54	20.9		3200	144.58	25.07
898	Olfr1383	olfactory receptor 1383	NM_207574	11	49337227	49338162	936	-		0	0	0		0	0	0		0	0	0		0	0	0
899	Csf3	granulocyte colony-stimulating factor precursor	NM_009971	11	98562627	98564943	1363	-		1	0.02	0.01		0	0	0		24	1.11	0.81		1	0.04	0.02
900	Clk4	dual specificity protein kinase CLK4	NM_007714	11	51076673	51095266	1892	-		207	6.06	3.2		134	4.63	2.44		300	13.9	7.34		619	27.96	14.77
901	Txndc17	thioredoxin domain-containing protein 17	NM_026559	11	72021056	72023989	1446	-		432	12.65	8.74		276	9.53	6.59		1113	51.6	35.68		1773	80.1	55.39
902	Fbxw11	F-box/WD repeat-containing protein 11	NM_134015	11	32542875	32646814	4019	-		1582	46.33	11.52		1972	68.15	16.95		1281	59.39	14.77		2316	104.64	26.03
903	Vezf1	vascular endothelial zinc finger 1	NM_016686	11	87881843	87898231	4521	-		1889	55.32	12.23		1388	47.97	10.61		839	38.9	8.6		1038	46.89	10.37
904	Lsmd1	LSM domain-containing protein 1	NM_030083	11	69209293	69210173	518	-		704	20.62	39.8		528	18.24	35.21		541	25.08	48.41		1029	46.49	89.74
905	Acsl6	long-chain-fatty-acid--CoA ligase 6 isoform 4	NM_001033599, NM_001033598, NM_144823, NM_001033597	11	54117326	54175041	2767	-		22	0.64	0.23		24	0.82	0.29		188	8.71	3.14		64	2.89	1.04
906	Sphk1	sphingosine kinase 1 isoform 3	NM_011451, NM_001172475, NM_025367, NM_001172473, NM_001172472	11	116394661	116397984	1649	-		3	0.08	0.04		4	0.13	0.07		321	14.88	9.02		32	1.44	0.87
907	BC053393	hypothetical protein LOC407814	NM_001025435	11	46385036	46402734	2041	-		0	0	0		0	0	0		0	0	0		4	0.18	0.08
908	Trp53	cellular tumor antigen p53 isoform b	NM_011640, NM_001127233	11	69393890	69405375	1782	-		987	28.9	16.21		836	28.89	16.21		376	17.43	9.78		8724	394.17	221.19
909	P4ha2	prolyl 4-hydroxylase subunit alpha-2 isoform 1	NM_011031, NM_001136076	11	53915018	53945150	2153	-		32	0.93	0.43		50	1.72	0.79		127	5.88	2.73		199	8.99	4.17
910		hypothetical protein LOC68964 isoform a	NM_026889, NM_001013256	11	68829615	68849972	3980	-		577	16.9	4.24		481	16.62	4.17		460	21.32	5.35		3703	167.31	42.03
911	Rapgef6	Rap guanine nucleotide exchange factor (GEF) 6	NM_175258	11	54336349	54512787	8212	-		1531	44.84	5.46		1849	63.9	7.78		1322	61.29	7.46		931	42.06	5.12
912	Pik3r6	phosphoinositide 3-kinase regulatory subunit 6	NM_001081566, NM_001004435	11	68316521	68366200	3237	-		5	0.14	0.04		4	0.13	0.04		296	13.72	4.23		1	0.04	0.01
913	Ikzf1	DNA-binding protein Ikaros isoform b	NM_001025597, NM_009578	11	11586216	11672929	5163	-		48	1.4	0.27		40	1.38	0.26		1412	65.46	12.67		38	1.71	0.33
914	Naglu	alpha-N-acetylglucosaminidase	NM_013792	11	100931439	100938966	2452	-		133	3.89	1.58		264	9.12	3.71		2375	110.11	44.9		38	1.71	0.69
915	Ccl7	C-C motif chemokine 7	NM_013654	11	81859216	81861025	911	-		0	0	0		0	0	0		231	10.71	11.75		74	3.34	3.66
916	Aloxe3	epidermis-type lipoxygenase 3	NM_011786	11	68939879	68962616	2536	-		19	0.55	0.21		20	0.69	0.27		4	0.18	0.07		8	0.36	0.14
917	Hba-x	hemoglobin subunit zeta	NM_010405	11	32176602	32178113	597	-		1	0.02	0.03		0	0	0		0	0	0		0	0	0
918	Mfap4	microfibril-associated glycoprotein 4 precursor	NM_029568	11	61298946	61302206	1513	-		46	1.34	0.88		26	0.89	0.58		181	8.39	5.54		38	1.71	1.13
919	Agxt2l2	alanine-glyoxylate aminotransferase 2-like 2	NM_028398	11	51398259	51416771	1896	-		1264	37.02	19.52		1256	43.41	22.89		2624	121.66	64.16		12908	583.21	307.6
920	Map2k6	dual specificity mitogen-activated protein	NM_011943	11	110260436	110374951	2064	-		344	10.07	4.87		126	4.35	2.1		70	3.24	1.56		370	16.71	8.09
921	Rdm1	RAD52 motif-containing protein 1	NM_025654	11	101489263	101497395	1098	-		60	1.75	1.59		46	1.58	1.43		132	6.12	5.57		649	29.32	26.7
922	Gatsl3	GATS-like protein 3	NM_028022	11	4118254	4122412	1570	-		266	7.79	4.96		285	9.85	6.27		74	3.43	2.18		1040	46.99	29.92
923	Fzd2	frizzled-2 precursor	NM_020510	11	102465745	102469372	3628	-		16	0.46	0.12		15	0.51	0.14		89	4.12	1.13		220	9.94	2.73
924	Olfr51	olfactory receptor 51	NM_146909	11	50820476	50821399	924	-		0	0	0		0	0	0		0	0	0		0	0	0
925	Hoxb9	homeobox protein Hox-B9	NM_008270	11	96132644	96137907	2711	-		2	0.05	0.01		2	0.06	0.02		1005	46.59	17.18		79	3.56	1.31
926	Ccdc88a	girdin	NM_176841	11	29273775	29410811	9263	-		1145	33.53	3.61		1065	36.8	3.97		689	31.94	3.44		625	28.23	3.04
927	1810012P15Rik	hypothetical protein LOC66274	NM_001076681	11	78640097	78657401	5053	-		174	5.09	1		103	3.56	0.7		195	9.04	1.78		214	9.66	1.91
928	Nkiras2	NF-kappa-B inhibitor-interacting Ras-like	NM_028024	11	100484269	100488916	2013	-		303	8.87	4.4		344	11.88	5.9		1376	63.79	31.68		956	43.19	21.45
929	Olfr312	olfactory receptor 312	NM_001011819	11	58644658	58645584	927	-		0	0	0		0	0	0		0	0	0		0	0	0
930	Kcnmb1	calcium-activated potassium channel subunit	NM_031169	11	33863286	33871275	1551	-		10	0.29	0.18		10	0.34	0.21		9	0.41	0.26		9	0.4	0.25
931	P2rx1	P2X purinoceptor 1 isoform 2	NM_008771	11	72812647	72828699	2441	-		2	0.05	0.02		0	0	0		323	14.97	6.13		5	0.22	0.09
932	Prpf8	pre-mRNA-processing-splicing factor 8	NM_138659	11	75300279	75322949	7500	-		23010	673.96	89.86		20960	724.44	96.59		3519	163.15	21.75		18767	847.94	113.05
933	Stat5a	signal transducer and activator of transcription	NM_001164062, NM_011488	11	100720717	100746483	3884	-		489	14.32	3.68		626	21.63	5.56		1367	63.38	16.31		186	8.4	2.16
934	Cdrt4	CMT1A duplicated region transcript 4 protein	NM_025496	11	62764695	62806597	723	-		1	0.02	0.02		0	0	0		2814	130.47	180.45		1	0.04	0.05
935	Olfr20	olfactory receptor 20	NM_146923	11	73167257	73168201	945	-		0	0	0		0	0	0		0	0	0		0	0	0
936	Grb7	growth factor receptor-bound protein 7	NM_010346	11	98308148	98316687	2413	-		15	0.43	0.17		12	0.41	0.16		801	37.13	15.38		794	35.87	14.86
937	Ankrd36	ankyrin repeat domain 36	NM_023816	11	5469687	5589340	4491	-		510	14.93	3.32		480	16.59	3.69		1179	54.66	12.17		302	13.64	3.03
938	Smcr8	Smith-Magenis syndrome chromosome region,	NM_175491, NM_001085440	11	60591027	60601789	7394	-		478	14	1.89		464	16.03	2.16		929	43.07	5.82		1694	76.53	10.35
939	Lcp2	larval cuticle protein 2	NM_010696	11	33947201	33992280	3348	-		385	11.27	3.36		344	11.88	3.54		652	30.23	9.02		1	0.04	0.01
940	Olfr1395	olfactory receptor 1395	NM_146877	11	48961761	48962714	954	-		0	0	0		0	0	0		0	0	0		0	0	0
941	Aspscr1	tether containing UBX domain for GLUT4 isoform	NM_026877, NM_001164224, NM_198223	11	120534352	120570760	1816	-		2450	71.76	39.51		2442	84.4	46.47		1511	70.05	38.57		2571	116.16	63.96
942	Ccdc137	coiled-coil domain-containing protein 137	NM_152807	11	120319443	120325667	2760	-		10	0.29	0.1		17	0.58	0.21		132	6.12	2.21		452	20.42	7.39
943	Prr15l	proline-rich protein 15-like protein	NM_146026	11	96790638	96796961	1410	-		0	0	0		0	0	0		351	16.27	11.53		33	1.49	1.05
944	Stk10	serine/threonine-protein kinase 10	NM_009288	11	32433266	32524595	5082	-		1180	34.56	6.8		942	32.55	6.4		835	38.71	7.61		467	21.1	4.15
945	Phf23	PHD finger protein 23	NM_030064	11	69809279	69813418	1910	-		3060	89.62	46.92		2136	73.82	38.64		1211	56.14	29.39		3220	145.48	76.16
946	Hes7	transcription factor HES-7	NM_033041	11	68933955	68936761	964	-		4	0.11	0.11		10	0.34	0.35		0	0	0		1	0.04	0.04
947	Fancl	E3 ubiquitin-protein ligase FANCL	NM_025923	11	26287084	26371876	1775	-		419	12.27	6.91		307	10.61	5.97		148	6.86	3.86		1036	46.8	26.36
948	Narf	nuclear prelamin A recognition factor	NM_026272	11	121098550	121117170	4426	-		1299	38.04	8.59		993	34.32	7.75		674	31.25	7.06		232	10.48	2.36
949	Il12b	interleukin-12 subunit beta	NM_008352	11	44213565	44227519	1951	-		3	0.08	0.04		10	0.34	0.17		8	0.37	0.18		0	0	0
950	Flt4	vascular endothelial growth factor receptor 3	NM_008029	11	49423229	49465731	5283	-		3	0.08	0.01		1	0.03	0		135	6.25	1.18		65	2.93	0.55
951	1200014J11Rik	ELG protein	NM_025818	11	72861382	72893718	2908	-		2204	64.55	22.19		2065	71.37	24.54		427	19.79	6.8		1843	83.27	28.63
952	Gm885	mast cell antigen 32 precursor	NM_001033435	11	106612582	106628882	1320	-		4	0.11	0.08		5	0.17	0.12		254	11.77	8.91		3	0.13	0.09
953	Tekt3	tektin-3	NM_027660	11	62875161	62908462	1739	-		0	0	0		0	0	0		389	18.03	10.36		0	0	0
954	Adamts2	A disintegrin and metalloproteinase with	NM_175643	11	50415587	50617551	3741	-		35	1.02	0.27		35	1.2	0.32		189	8.76	2.34		59	2.66	0.71
955	Mfap3	microfibril-associated glycoprotein 3 precursor	NM_145426, NM_180599	11	57332167	57347319	4864	-		2985	87.43	17.97		2650	91.59	18.83		680	31.52	6.48		1297	58.6	12.04
956	Sstr2	somatostatin receptor type 2 isoform A	NM_001042606, NM_009217	11	113485571	113486950	1110	-		0	0	0		0	0	0		0	0	0		1	0.04	0.03
957	Mmd	monocyte to macrophage differentiation protein	NM_026178	11	90110790	90139887	2780	-		221	6.47	2.32		229	7.91	2.84		356	16.5	5.93		152	6.86	2.46
958	Arl4d	ADP-ribosylation factor-like protein 4D	NM_025404	11	101526855	101529146	1397	-		144	4.21	3.01		134	4.63	3.31		214	9.92	7.1		70	3.16	2.26
959	Rpl26	ribosomal protein L26	NM_009080	11	68715068	68718036	564	-		1438	42.11	74.66		799	27.61	48.95		5868	272.07	482.39		7366	332.81	590.08
960	Per1	period circadian protein homolog 1	NM_011065, NM_001159367	11	68912451	68923459	4669	-		1777	52.04	11.14		1874	64.77	13.87		1102	51.09	10.94		688	31.08	6.65
961	Cdr2l	cerebellar degeneration-related protein 2-like	NM_001080929	11	115243230	115257446	3700	-		77	2.25	0.6		87	3	0.81		29	1.34	0.36		801	36.19	9.78
962	Bcas3	breast carcinoma amplified sequence 3	NM_001166642, NM_001166643, NM_138681	11	85166716	85639553	3599	-		1914	56.06	15.57		1580	54.6	15.17		632	29.3	8.14		761	34.38	9.55
963	Ascc2	activating signal cointegrator 1 complex subunit	NM_029291	11	4537796	4583388	2623	-		657	19.24	7.33		814	28.13	10.72		905	41.96	15.99		1393	62.93	23.99
964	Atp6v0a1	V-type proton ATPase 116 kDa subunit a isoform	NM_016920	11	100870769	100925028	4000	-		1122	32.86	8.21		1250	43.2	10.8		4478	207.62	51.9		1219	55.07	13.76
965	Pes1	pescadillo homolog	NM_022889	11	3863978	3880007	2911	-		3888	113.88	39.12		2786	96.29	33.07		799	37.04	12.72		5018	226.72	77.88
966	Hoxb8	homeobox protein Hox-B8	NM_010461	11	96143219	96146639	2645	-		0	0	0		0	0	0		2328	107.93	40.8		1	0.04	0.01
967	Samd14	sterile alpha motif domain-containing protein 14	NM_146025	11	94871193	94887401	3334	-		0	0	0		2	0.06	0.01		199	9.22	2.76		12	0.54	0.16
968	Fstl4	follistatin-related protein 4 precursor	NM_177059	11	52578208	53000849	3117	-		724	21.2	6.8		592	20.46	6.56		2	0.09	0.02		9	0.4	0.12
969	Tnrc6c	trinucleotide repeat-containing gene 6C protein	NM_198022	11	117515603	117624753	8740	-		5252	153.83	17.6		3961	136.9	15.66		805	37.32	4.27		2606	117.74	13.47
970	Expi	extracellular peptidase inhibitor precursor	NM_007969	11	83522506	83524862	567	-		0	0	0		0	0	0		6	0.27	0.47		0	0	0
971	Sh3pxd2b	SH3 and PX domain-containing protein 2B	NM_177364	11	32247811	32328183	7432	-		67	1.96	0.26		68	2.35	0.31		2073	96.11	12.93		164	7.4	0.99
972	Rab37	ras-related protein Rab-37 isoform 2	NM_021411, NM_001163753	11	115015499	115023542	2174	-		35	1.02	0.46		24	0.82	0.37		50	2.31	1.06		17	0.76	0.34
973	Sat2	diamine acetyltransferase 2	NM_026991	11	69435611	69437371	912	-		1	0.02	0.02		1	0.03	0.03		38	1.76	1.92		25	1.12	1.22
974	Enpp7	ectonucleotide pyrophosphatase/phosphodiesterase	NM_001030291	11	118849502	118854155	1370	-		0	0	0		0	0	0		0	0	0		0	0	0
975	Olfr402	olfactory receptor 402	NM_146708	11	73968658	73969605	948	-		0	0	0		0	0	0		0	0	0		0	0	0
976	Spata22	spermatogenesis-associated protein 22	NM_001045531	11	73143243	73159546	1274	-		1	0.02	0.01		2	0.06	0.04		0	0	0		5	0.22	0.17
977	Sec14l3	SEC14-like protein 3	NM_001029937	11	3964844	3976617	1566	-		280	8.2	5.23		103	3.56	2.27		0	0	0		0	0	0
978	Nipsnap1	4-nitrophenylphosphatase domain and non-neuronal	NM_008698	11	4774006	4794203	1874	-		2451	71.79	38.3		1639	56.64	30.22		104	4.82	2.57		2464	111.33	59.4
979	Dbnl	drebrin-like protein isoform 3	NM_001146308, NM_001146309, NM_013810	11	5688533	5700965	2295	-		354	10.36	4.51		375	12.96	5.64		2238	103.76	45.21		1363	61.58	26.83
980	Itgb3	integrin beta-3 precursor	NM_016780	11	104469314	104531785	5795	-		3435	100.61	17.36		2711	93.7	16.16		1541	71.44	12.32		81	3.65	0.62
981	Olfr225	olfactory receptor 225	NM_001011740	11	59426468	59427727	1260	-		0	0	0		0	0	0		0	0	0		0	0	0
982	Tbc1d10a	TBC1 domain family member 10A	NM_134023	11	4086836	4115508	1929	-		1198	35.08	18.18		1223	42.27	21.91		389	18.03	9.34		722	32.62	16.91
983	Zzef1	zinc finger ZZ-type and EF-hand	NM_001045536	11	72609728	72740622	11150	-		611	17.89	1.6		868	30	2.69		1109	51.41	4.61		718	32.44	2.9
984	Dusp18	dual specificity protein phosphatase 18	NM_173745	11	3795284	3801299	4589	-		1532	44.87	9.77		1563	54.02	11.77		312	14.46	3.15		203	9.17	1.99
985	Tmem220	transmembrane protein 220	NM_177392	11	66838656	66848292	1147	-		5	0.14	0.12		1	0.03	0.02		46	2.13	1.85		24	1.08	0.94
986	AV249152	WD repeat-containing protein C2orf86 homolog	NM_145425	11	21472284	21798689	2443	-		238	6.97	2.85		144	4.97	2.03		225	10.43	4.26		63	2.84	1.16
987	Slfn2	schlafen family member 12-like	NM_011408	11	82878614	82884180	1684	-		516	15.11	8.97		706	24.4	14.48		1475	68.38	40.6		18	0.81	0.48
988	Rnf135	E3 ubiquitin-protein ligase RNF135	NM_028019	11	79997374	80013255	1959	-		257	7.52	3.83		179	6.18	3.15		123	5.7	2.9		131	5.91	3.01
989	Uts2r	urotensin-2 receptor	NM_145440	11	121021585	121023287	1703	-		115	3.36	1.97		107	3.69	2.16		0	0	0		0	0	0
990	Unk	RING finger protein unkempt homolog	NM_172569	11	115891636	115922508	3715	-		3826	112.06	30.16		4022	139.01	37.41		370	17.15	4.61		751	33.93	9.13
991	Aoc3	membrane primary amine oxidase	NM_009675	11	101191919	101200738	4452	-		4	0.11	0.02		4	0.13	0.02		86	3.98	0.89		41	1.85	0.41
992	Ccdc46	coiled-coil domain-containing protein 46 isoform	NM_029586, NM_145688, NM_029606	11	108286580	108721929	3516	-		27	0.79	0.22		26	0.89	0.25		787	36.48	10.37		48	2.16	0.61
993	Grap	GRB2-related adapter protein	NM_027817	11	61466823	61486279	1599	-		0	0	0		1	0.03	0.01		72	3.33	2.08		0	0	0
994	Olfr1378	olfactory receptor 1378	NM_146910	11	50782522	50783469	948	-		0	0	0		0	0	0		0	0	0		0	0	0
995	Gas7	growth arrest-specific protein 7 isoform b	NM_001109657, NM_008088	11	67346500	67502494	7112	-		27	0.79	0.11		21	0.72	0.1		1776	82.34	11.57		53	2.39	0.33
996	Itgae	integrin alpha-E isoform 2	NM_008399, NM_172944	11	72904085	72960943	3851	-		6504	190.5	49.46		4573	158.05	41.04		2468	114.42	29.71		790	35.69	9.26
997	Olfr1377	olfactory receptor 1377	NM_146911	11	50798205	50799128	924	-		0	0	0		0	0	0		0	0	0		0	0	0
998	Olfr1381	olfactory receptor 1381	NM_146469	11	49365251	49366186	936	-		0	0	0		0	0	0		0	0	0		0	0	0
999	Zmat5	zinc finger matrin-type protein 5	NM_026015	11	4604681	4637669	789	-		538	15.75	19.96		524	18.11	22.95		162	7.51	9.51		662	29.91	37.9
1000	Cisd3	CDGSH iron-sulfur domain-containing protein 3,	NM_001085500	11	97547266	97549939	750	-		57	1.66	2.21		20	0.69	0.92		21	0.97	1.29		499	22.54	30.05
1001	Ccl2	C-C motif chemokine 2	NM_011333	11	81849079	81850954	806	-		27	0.79	0.98		38	1.31	1.62		431	19.98	24.78		63	2.84	3.52
1002	Pigs	GPI transamidase component PIG-S	NM_201406	11	78141924	78156278	2505	-		1125	32.95	13.15		1323	45.72	18.25		1046	48.49	19.35		1535	69.35	27.68
1003	Spag5	sperm-associated antigen 5	NM_017407	11	78115141	78135956	3818	-		3170	92.85	24.31		2709	93.63	24.52		120	5.56	1.45		2327	105.14	27.53
1004	1810065E05Rik	hypothetical protein LOC69864	NM_027239	11	58234613	58239525	961	-		3	0.08	0.08		12	0.41	0.42		9	0.41	0.42		0	0	0
1005	Cntd1	cyclin N-terminal domain-containing protein 1	NM_026562	11	101140517	101150015	2228	-		603	17.66	7.92		415	14.34	6.43		397	18.4	8.25		346	15.63	7.01
1006	Tsr1	pre-rRNA-processing protein TSR1 homolog	NM_177325	11	74711582	74722842	3395	-		538	15.75	4.63		849	29.34	8.64		1246	57.77	17.01		6203	280.26	82.55
1007	Mink1	misshapen-like kinase 1 isoform 2	NM_016713, NM_001045959, NM_176893, NM_001045964	11	70376383	70427984	4994	-		1269	37.16	7.44		1984	68.57	13.73		2064	95.69	19.16		2207	99.71	19.96
1008	Myh10	myosin-10	NM_175260	11	68505417	68630126	7783	-		1160	33.97	4.36		1193	41.23	5.29		1494	69.26	8.89		2974	134.37	17.26
1009	Ccdc40	coiled-coil domain-containing protein 40	NM_175430	11	119089886	119126526	4979	-		57	1.66	0.33		43	1.48	0.29		220	10.2	2.04		52	2.34	0.46
1010	Mllt6	myeloid/lymphoid or mixed lineage-leukemia	NM_139311	11	97524726	97546772	7271	-		80	2.34	0.32		84	2.9	0.39		1155	53.55	7.36		4596	207.65	28.55
1011	Spag9	C-Jun-amino-terminal kinase-interacting protein	NM_027569, NM_001025429, NM_001025430, NM_001025428, NM_001199203, NM_001199204, NM_001199205	11	93857405	93987396	7365	-		102	2.98	0.4		122	4.21	0.57		2389	110.76	15.03		1207	54.53	7.4
1012	Trpv2	transient receptor potential cation channel	NM_011706	11	62387988	62413807	2751	-		292	8.55	3.1		245	8.46	3.07		882	40.89	14.86		67	3.02	1.09
1013	B9d1	B9 domain-containing protein 1	NM_013717	11	61318674	61326429	816	-		946	27.7	33.94		598	20.66	25.31		209	9.69	11.87		427	19.29	23.63
1014	Anapc11	anaphase-promoting complex subunit 11	NM_001038230, NM_025389	11	120459751	120469512	3290	-		1723	50.46	15.33		1344	46.45	14.11		759	35.19	10.69		1899	85.8	26.07
1015	Ccl4	C-C motif chemokine 4	NM_013652	11	83476086	83478185	674	-		16	0.46	0.68		10	0.34	0.5		169	7.83	11.61		3	0.13	0.19
1016	Clec10a	macrophage asialoglycoprotein-binding protein 1	NM_010796	11	69980276	69984336	1345	-		672	19.68	14.63		432	14.93	11.1		103	4.77	3.54		1	0.04	0.02
1017	Axin2	axin-2	NM_015732	11	108781663	108812095	4279	-		9310	272.69	63.72		6435	222.41	51.97		749	34.72	8.11		843	38.08	8.89
1018	Olfr23	olfactory receptor 23	NM_010970	11	73753750	73754727	978	-		0	0	0		0	0	0		0	0	0		0	0	0
1019	Trim16	tripartite motif protein 16	NM_053169	11	62633755	62656450	3896	-		0	0	0		0	0	0		213	9.87	2.53		35	1.58	0.4
1020	Aldh3a1	aldehyde dehydrogenase, dimeric NADP-preferring	NM_001112725, NM_007436	11	61022244	61031918	1729	-		17	0.49	0.28		29	1	0.57		7	0.32	0.18		18	0.81	0.46
1021		acyl-Coenzyme A binding domain containing 4	NM_001081495, NM_025988	11	102963002	102973513	2081	-		0	0	0		2	0.06	0.02		254	11.77	5.65		149	6.73	3.23
1022	Mrc2	C-type mannose receptor 2 precursor	NM_008626	11	105153960	105212459	5801	-		5	0.14	0.02		4	0.13	0.02		119	5.51	0.94		126	5.69	0.98
1023	Psmb6	proteasome subunit beta type-6 precursor	NM_008946	11	70338910	70341151	798	-		3031	88.77	111.24		2790	96.43	120.83		3030	140.48	176.04		6915	312.43	391.51
1024	Rpl19	60S ribosomal protein L19 isoform 1	NM_001159483, NM_009078	11	97889135	97891791	673	-		1062	31.1	46.21		768	26.54	39.43		2837	131.53	195.43		8152	368.32	547.28
1025	Tubg2	tubulin gamma-2 chain	NM_134028	11	101017227	101023101	1771	-		4832	141.53	79.91		4942	170.81	96.44		31	1.43	0.8		21	0.94	0.53
1026	Olfr315	olfactory receptor 315	NM_146538	11	58591631	58592560	930	-		49	1.43	1.53		29	1	1.07		0	0	0		0	0	0
1027	Proca1	protein PROCA1	NM_001045516	11	78006894	78019265	1529	-		171	5	3.27		121	4.18	2.73		1883	87.3	57.09		77	3.47	2.26
1028	Skap1	src kinase-associated phosphoprotein 1 isoform	NM_001177898, NM_001033186, NM_001177899	11	96325938	96620936	2157	-		5100	149.38	69.25		4637	160.26	74.29		576	26.7	12.37		16	0.72	0.33
1029	Poldip2	polymerase delta-interacting protein 2	NM_026389	11	78325798	78336238	1951	-		779	22.81	11.69		874	30.2	15.47		1364	63.24	32.41		1936	87.47	44.83
1030	Zfp62	zinc finger protein 62 isoform 2	NM_001024846, NM_009562	11	49017002	49032318	4034	-		580	16.98	4.2		802	27.71	6.86		270	12.51	3.1		366	16.53	4.09
1031	Slc25a35	solute carrier family 25 member 35	NM_028048	11	68781633	68786017	1827	-		1258	36.84	20.16		1131	39.09	21.39		272	12.61	6.9		72	3.25	1.77
1032	2310067B10Rik	hypothetical protein LOC71947	NM_028014	11	115626747	115660347	4996	-		480	14.05	2.81		484	16.72	3.34		928	43.02	8.61		1211	54.71	10.95
1033	Fam196b	hypothetical protein LOC574403	NM_001025382	11	34214822	34322640	5050	-		22	0.64	0.12		17	0.58	0.11		153	7.09	1.4		9	0.4	0.07
1034	Slc36a1	proton-coupled amino acid transporter 1	NM_153139	11	55017842	55049832	5280	-		637	18.65	3.53		618	21.36	4.04		1637	75.89	14.37		394	17.8	3.37
1035	Gfpt2	glucosamine--fructose-6-phosphate	NM_013529	11	49607691	49652115	2957	-		47	1.37	0.46		27	0.93	0.31		149	6.9	2.33		1941	87.69	29.65
1036	Ybx2	Y-box-binding protein 2	NM_016875	11	69749401	69755101	1564	-		10579	309.86	198.12		11836	409.09	261.56		7593	352.05	225.09		409	18.47	11.8
1037	Fam18b	hypothetical protein LOC67510	NM_026210	11	62692992	62708686	1748	-		3032	88.8	50.8		2049	70.82	40.51		732	33.93	19.41		466	21.05	12.04
1038	Lrrc45	leucine-rich repeat-containing protein 45	NM_153545	11	120575287	120582441	2528	-		441	12.91	5.1		453	15.65	6.19		235	10.89	4.3		259	11.7	4.62
1039	Vps25	vacuolar protein-sorting-associated protein 25	NM_026776	11	101115057	101120860	1112	-		1228	35.96	32.33		1083	37.43	33.66		865	40.1	36.06		1753	79.2	71.22
1040	Ppp1r1b	protein phosphatase 1 regulatory subunit 1B	NM_144828	11	98210052	98219109	1682	-		16	0.46	0.27		7	0.24	0.14		33	1.53	0.9		39	1.76	1.04
1041	Myo1c	myosin-Ic isoform b	NM_001080775, NM_001080774, NM_008659	11	75465011	75488136	5318	-		6986	204.62	38.47		6711	231.95	43.61		2632	122.03	22.94		3429	154.93	29.13
1042	Krtap31-2	keratin associated protein 31-2	NM_001025244	11	99797605	99798539	937	-		0	0	0		0	0	0		0	0	0		0	0	0
1043	Rasgef1c	ras-GEF domain-containing family member 1C	NM_029004	11	49715337	49793725	2248	-		8	0.23	0.1		5	0.17	0.07		8	0.37	0.16		4	0.18	0.08
1044	4930524B15Rik	hypothetical protein LOC67592	NM_026262	11	31865633	31879651	1959	-		2	0.05	0.02		1	0.03	0.01		71	3.29	1.67		8	0.36	0.18
1045	Abca13	ATP-binding cassette sub-family A member 13	NM_178259	11	9091945	9584262	16011	-		1790	52.42	3.27		2189	75.65	4.72		0	0	0		13	0.58	0.03
1046	Mmgt2	membrane magnesium transporter 2 precursor	NM_175002	11	62462166	62479861	1883	-		167	4.89	2.59		145	5.01	2.66		415	19.24	10.21		132	5.96	3.16
1047	Psmb3	proteasome subunit beta type-3	NM_011971	11	97564748	97574814	731	-		537	15.72	21.5		544	18.8	25.71		719	33.33	45.59		2845	128.54	175.84
1048	2210415F13Rik	RIKEN cDNA 2210415F13 precursor	NM_027339, NM_001083884	11	58192534	58204043	1122	-		0	0	0		3	0.1	0.08		22	1.02	0.9		0	0	0
1049	C030019I05Rik	fibronectin type-III domain-containing protein	NM_177075	11	46049059	46053373	2262	-		290	8.49	3.75		229	7.91	3.49		165	7.65	3.38		61	2.75	1.21
1050	Pitpna	phosphatidylinositol transfer protein alpha	NM_008850	11	75401610	75442280	3724	-		1747	51.17	13.74		1398	48.31	12.97		3524	163.39	43.87		1810	81.78	21.96
1051	Hils1	spermatid-specific linker histone H1-like	NM_018792	11	94828975	94829770	796	-		0	0	0		0	0	0		880	40.8	51.25		0	0	0
1052	Nf1	neurofibromin 1, isoform B	NM_010897	11	79153394	79395111	11847	-		1704	49.91	4.21		1334	46.1	3.89		2647	122.72	10.35		886	40.03	3.37
1053	Psme3	proteasome activator complex subunit 3	NM_011192	11	101177565	101184844	2620	-		13750	402.74	153.71		11047	381.82	145.73		1591	73.76	28.15		6092	275.25	105.05
1054	Erbb2	receptor tyrosine-protein kinase erbB-2	NM_001003817	11	98273798	98299030	4998	-		0	0	0		5	0.17	0.03		1656	76.78	15.36		372	16.8	3.36
1055	Psmd12	26S proteasome non-ATPase regulatory subunit 12	NM_025894	11	107340842	107359350	1723	-		4526	132.56	76.93		2954	102.09	59.25		1009	46.78	27.15		4562	206.12	119.62
1056	Helz	probable helicase with zinc finger domain	NM_198298	11	107409274	107548257	6240	-		1521	44.55	7.13		877	30.31	4.85		425	19.7	3.15		2484	112.23	17.98
1057	Gsdma	gasdermin-A	NM_021347	11	98525665	98539022	2729	-		0	0	0		0	0	0		89	4.12	1.5		2	0.09	0.03
1058	Gabrb2	gamma-aminobutyric acid receptor subunit beta-2	NM_008070	11	42233259	42446093	7568	-		10	0.29	0.03		12	0.41	0.05		0	0	0		9	0.4	0.05
1059	Rnf130	E3 ubiquitin-protein ligase RNF130 precursor	NM_021540	11	49838833	49918235	1501	-		1361	39.86	26.55		1073	37.08	24.7		1633	75.71	50.43		164	7.4	4.93
1060	Mett10d	putative methyltransferase METT10D	NM_026197	11	74584365	74632194	2718	-		970	28.41	10.45		592	20.46	7.52		296	13.72	5.04		1919	86.7	31.89
1061	Mnt	Mnt, isoform F	NM_010813	11	74644426	74659227	4601	-		445	13.03	2.83		618	21.36	4.64		1089	50.49	10.97		2267	102.42	22.26
1062	D11Wsu47e	hypothetical protein LOC276852	NM_177777	11	113545726	113555961	2230	-		1093	32.01	14.35		996	34.42	15.43		630	29.21	13.09		816	36.86	16.52
1063	2310047M10Rik	hypothetical protein LOC71923	NM_028005	11	68873277	68875078	1802	-		17	0.49	0.27		24	0.82	0.45		296	13.72	7.61		155	7	3.88
1064	Tbx2	T-box transcription factor TBX2	NM_009324	11	85646117	85655450	3562	-		1	0.02	0		2	0.06	0.01		757	35.09	9.85		9	0.4	0.11
1065	G6pc3	glucose-6-phosphatase 3	NM_175935	11	102051013	102055396	1612	-		288	8.43	5.22		270	9.33	5.78		1741	80.72	50.07		331	14.95	9.27
1066	Map2k3	mitogen activated protein kinase kinase 3	NM_008928	11	60745559	60766305	2166	-		86	2.51	1.15		67	2.31	1.06		877	40.66	18.77		1658	74.91	34.58
1067	Fam64a	family with sequence similarity 64, member A	NM_144526	11	71856004	71860872	1466	-		5	0.14	0.09		9	0.31	0.21		16	0.74	0.5		606	27.38	18.67
1068	Ppp1r9b	neurabin-2	NM_172261	11	94852526	94868197	4317	-		3380	99	22.93		3589	124.04	28.73		2291	106.22	24.6		1185	53.54	12.4
1069	Bcl11a	B-cell lymphoma/leukemia 11A	NM_016707, NM_001159290, NM_001159289	11	23978117	24073194	3000	-		5	0.14	0.04		9	0.31	0.1		148	6.86	2.28		13	0.58	0.19
1070	2310033P09Rik	multiple myeloma tumor-associated protein 2	NM_024210	11	59021863	59024236	1243	-		1279	37.46	30.13		897	31	24.93		237	10.98	8.83		418	18.88	15.18
1071	2011-09-04	septin-4	NM_011129	11	87394633	87404041	1649	-		1	0.02	0.01		0	0	0		321	14.88	9.02		15	0.67	0.4
1072	Arf2	ADP-ribosylation factor 2	NM_007477	11	103828185	103846650	2659	-		66	1.93	0.72		92	3.17	1.19		637	29.53	11.1		912	41.2	15.49
1073	Tmigd1	transmembrane and immunoglobulin domain	NM_025655	11	76718047	76730088	1366	-		41	1.2	0.87		37	1.27	0.92		0	0	0		0	0	0
1074	Rcvrn	recoverin	NM_009038	11	67508828	67516857	1076	-		0	0	0		0	0	0		0	0	0		0	0	0
1075	Kif3a	kinesin family member 3a	NM_008443	11	53380881	53417746	5438	-		1953	57.2	10.51		1995	68.95	12.67		707	32.78	6.02		682	30.81	5.66
1076		ribosomal protein L27-like	NM_001110339	11	101303732	101306843	519	-		42	1.23	2.36		45	1.55	2.98		89	4.12	7.93		1850	83.58	161.04
1077	Olfr10	olfactory receptor 10	NM_206822	11	49131050	49131985	936	-		0	0	0		0	0	0		0	0	0		0	0	0
1078	Otop3	otopetrin-3	NM_027132	11	115196048	115208240	2422	-		6	0.17	0.07		2	0.06	0.02		27	1.25	0.51		3	0.13	0.05
1079	Socs7	suppressor of cytokine signaling 7	NM_138657	11	97223865	97259856	7015	-		14944	437.71	62.39		13493	466.36	66.48		5465	253.38	36.11		1308	59.09	8.42
1080	Mgl2	macrophage galactose N-acetyl-galactosamine	NM_145137	11	69943859	69951044	1550	-		10	0.29	0.18		13	0.44	0.28		44	2.04	1.31		0	0	0
1081	Tmem132e	transmembrane protein 132E	NM_023438	11	82202402	82259829	4105	-		14	0.41	0.09		8	0.27	0.06		5	0.23	0.05		1	0.04	0
1082	Rundc1	RUN domain-containing protein 1	NM_172566	11	101286399	101296772	3010	-		13	0.38	0.12		14	0.48	0.15		487	22.57	7.49		485	21.91	7.27
1083	Eif4enif1	eukaryotic translation initiation factor 4E	NM_001166549, NM_001166548, NM_001166547, NM_023743	11	3102765	3144584	3508	-		32212	943.49	268.95		29367	1015.01	289.34		635	29.44	8.39		2263	102.24	29.14
1084	Tob1	protein Tob1	NM_009427	11	94072768	94076806	2288	-		515	15.08	6.59		559	19.32	8.44		213	9.87	4.31		1085	49.02	21.42
1085	Hbq1	hemoglobin, theta T2	NM_175000	11	32200069	32200873	604	-		22	0.64	1.05		8	0.27	0.44		2	0.09	0.14		0	0	0
1086	Birc5	baculoviral IAP repeat-containing protein 5	NM_009689, NM_001012273	11	117710551	117717057	3416	-		13714	401.68	117.58		9921	342.9	100.38		84	3.89	1.13		3345	151.13	44.24
1087	Myh2	myosin heavy chain IIa	NM_001039545	11	66984722	67011016	5928	-		587	17.19	2.89		234	8.08	1.36		1	0.04	0		0	0	0
1088	Nmt1	glycylpeptide N-tetradecanoyltransferase 1	NM_008707	11	102889876	102927419	1838	-		2907	85.14	46.32		2431	84.02	45.71		1424	66.02	35.91		3723	168.21	91.51
1089	Smyd4	SET and MYND domain protein 4	NM_001102611	11	75161935	75219207	3517	-		711	20.82	5.91		679	23.46	6.67		97	4.49	1.27		441	19.92	5.66
1090	Ccdc42	coiled-coil domain-containing protein 42A	NM_177779	11	68400539	68411453	1353	-		243	7.11	5.25		164	5.66	4.18		200	9.27	6.85		0	0	0
1091	Gp1ba	platelet glycoprotein Ib alpha chain precursor	NM_010326	11	70452624	70455557	2732	-		8	0.23	0.08		8	0.27	0.09		3	0.13	0.04		16	0.72	0.26
1092	BC030867	hypothetical protein LOC217216	NM_153544	11	102110196	102126497	2543	-		4391	128.61	50.57		4398	152	59.77		65	3.01	1.18		1724	77.89	30.62
1093	Pnmt	phenylethanolamine N-methyltransferase	NM_008890	11	98247946	98249411	888	-		70	2.05	2.3		40	1.38	1.55		1465	67.92	76.48		0	0	0
1094	Ccm2	malcavernin isoform 3	NM_146014, NM_001190343, NM_001190344	11	6446959	6496747	1789	-		654	19.15	10.7		553	19.11	10.68		729	33.8	18.89		842	38.04	21.26
1095	Casc3	protein CASC3	NM_138660	11	98671122	98695121	3764	-		383	11.21	2.97		484	16.72	4.44		603	27.95	7.42		2661	120.23	31.94
1096	Sox9	transcription factor SOX-9	NM_011448	11	112643524	112649071	4146	-		0	0	0		2	0.06	0.01		161	7.46	1.79		20	0.9	0.21
1097	Zpbp2	zona pellucida-binding protein 2 isoform 1	NM_027061, NM_199419, NM_001166494, NM_001166495	11	98412466	98419970	1455	-		77	2.25	1.54		60	2.07	1.42		420	19.47	13.38		2	0.09	0.06
1098	Dlg4	disks large homolog 4 isoform 2	NM_001109752, NM_007864	11	69832107	69859033	3339	-		1	0.02	0		1	0.03	0		109	5.05	1.51		116	5.24	1.56
1099	Ccdc45	coiled-coil domain-containing protein 45 isoform	NM_177088, NM_001166685	11	106650589	106680143	2672	-		4793	140.38	52.53		2873	99.3	37.16		221	10.24	3.83		424	19.15	7.16
1100	Tmem100	transmembrane protein 100	NM_026433	11	89891662	89897819	1764	-		0	0	0		0	0	0		19	0.88	0.49		2	0.09	0.05
1101	Apoh	beta-2-glycoprotein 1 precursor	NM_013475	11	108256611	108275710	1202	-		2	0.05	0.04		3	0.1	0.08		137	6.35	5.28		2	0.09	0.07
1102	Cdc6	cell division control protein 6	NM_011799, NM_001025779	11	98769203	98785256	4608	-		2521	73.84	16.02		1643	56.78	12.32		55	2.55	0.55		2807	126.82	27.52
1103	Ccnjl	cyclin-J-like protein	NM_001045530	11	43342286	43400499	2672	-		5	0.14	0.05		5	0.17	0.06		109	5.05	1.88		301	13.6	5.08
1104	Hexim2	protein HEXIM2	NM_001130515, NM_027658, NM_001130516	11	102995351	103001210	1816	-		1753	51.34	28.27		1437	49.66	27.34		212	9.82	5.4		75	3.38	1.86
1105	Mrps23	28S ribosomal protein S23, mitochondrial	NM_024174	11	88017920	88025009	1302	-		1501	43.96	33.76		1377	47.59	36.55		606	28.09	21.57		1598	72.2	55.45
1106	Trpv3	transient receptor potential cation channel	NM_145099	11	73081122	73110702	2440	-		277	8.11	3.32		187	6.46	2.64		0	0	0		6	0.27	0.11
1107	Sap30bp	SAP30-binding protein	NM_020483	11	115794973	115826848	2086	-		3772	110.48	52.96		2603	89.96	43.12		540	25.03	11.99		1693	76.49	36.66
1108	Gaa	lysosomal alpha-glucosidase precursor	NM_008064, NM_001159324	11	119129358	119146766	3504	-		2590	75.86	21.64		3171	109.6	31.27		2761	128.01	36.53		1400	63.25	18.05
1109	Fbxo48	F-box only protein 48	NM_176982	11	16851413	16854775	2117	-		10	0.29	0.13		5	0.17	0.08		0	0	0		26	1.17	0.55
1110	Myh3	myosin-3	NM_001099635	11	66891802	66915793	5992	-		53	1.55	0.25		74	2.55	0.42		8	0.37	0.06		120	5.42	0.9
1111	Asgr2	asialoglycoprotein receptor 2	NM_007493	11	69906146	69919688	1373	-		3205	93.87	68.36		1908	65.94	48.02		10	0.46	0.33		6	0.27	0.19
1112	Gprc5c	G-protein coupled receptor family C group 5	NM_147217, NM_001110337, NM_001110338	11	114712846	114733931	3977	-		2754	80.66	20.28		3023	104.48	26.27		1377	63.84	16.05		327	14.77	3.71
1113	Cldn7	claudin-7	NM_016887, NM_001193619	11	69779003	69781380	1223	-		18	0.52	0.42		24	0.82	0.67		660	30.6	25.02		487	22	17.98
1114	Fam33a	spindle and kinetochore-associated protein 2	NM_025377	11	86922763	86936476	1349	-		173	5.06	3.75		128	4.42	3.27		44	2.04	1.51		743	33.57	24.88
1115	Xbp1	X box binding protein-1	NM_013842	11	5420970	5425875	1817	-		4	0.11	0.06		40	1.38	0.75		1576	73.07	40.21		772	34.88	19.19
1116	Cct4	T-complex protein 1 subunit delta	NM_009837	11	22890593	22903336	1966	-		1322	38.72	19.69		1533	52.98	26.94		2208	102.37	52.07		15687	708.78	360.51
1117	Mrpl27	39S ribosomal protein L27, mitochondrial	NM_053161	11	94515105	94521401	828	-		88	2.57	3.1		71	2.45	2.95		263	12.19	14.72		425	19.2	23.18
1118	Foxk2	forkhead box protein K2	NM_001080932	11	121116808	121171210	5362	-		7237	211.97	39.53		6181	213.63	39.84		1845	85.54	15.95		2496	112.77	21.03
1119	Supt4h1	transcription elongation factor SPT4 1	NM_009296	11	87551067	87557119	693	-		214	6.26	9.03		192	6.63	9.56		228	10.57	15.25		352	15.9	22.94
1120	Thra	thyroid hormone receptor alpha	NM_178060	11	98603187	98626425	2246	-		1161	34	15.13		902	31.17	13.87		359	16.64	7.4		325	14.68	6.53
1121	Tbcd	tubulin-specific chaperone D	NM_029878	11	121313316	121478482	3857	-		12168	356.4	92.4		11851	409.6	106.19		1496	69.36	17.98		2762	124.79	32.35
1122	Ifi47	interferon gamma inducible protein 47	NM_008330	11	48900557	48910473	1681	-		3	0.08	0.04		3	0.1	0.05		221	10.24	6.09		41	1.85	1.1
1123	Sox15	Sox box protein 15	NM_009235	11	69468875	69470123	696	-		186	5.44	7.81		295	10.19	14.64		2	0.09	0.12		300	13.55	19.46
1124	Krtap31-1	keratin associated protein 31-1	NM_027568	11	99769234	99770204	971	-		0	0	0		0	0	0		0	0	0		0	0	0
1125	Zcchc10	zinc finger CCHC domain-containing protein 10	NM_026479	11	53138191	53146803	1257	-		5947	174.18	138.56		4010	138.59	110.25		55	2.55	2.02		852	38.49	30.62
1126	Ramp3	receptor activity-modifying protein 3	NM_019511	11	6558536	6577478	1221	-		634	18.57	15.2		387	13.37	10.95		210	9.73	7.96		96	4.33	3.54
1127	1300001I01Rik	hypothetical protein LOC74148	NM_001081158	11	74462997	74484349	5399	-		1209	35.41	6.55		1554	53.71	9.94		1602	74.27	13.75		5030	227.26	42.09
1128	Skp1a	S-phase kinase-associated protein 1	NM_011543	11	52045497	52060360	1454	-		50949	1492.3	1026.34		37248	1287.41	885.42		1755	81.37	55.96		6627	299.42	205.92
1129	Cog1	conserved oligomeric Golgi complex subunit 1	NM_013581	11	113510843	113523715	3060	-		1433	41.97	13.71		1238	42.78	13.98		2072	96.06	31.39		1152	52.05	17
1130	Gm2a	ganglioside GM2 activator precursor	NM_010299	11	54911619	54924400	2024	-		59	1.72	0.84		59	2.03	1		8185	379.49	187.49		712	32.17	15.89
1131	Clint1	clathrin interactor 1	NM_001045520	11	45665466	45724127	3398	-		5687	166.57	49.02		4684	161.89	47.64		3086	143.08	42.1		2841	128.36	37.77
1132	2610507B11Rik	hypothetical protein LOC72503 precursor	NM_001002004	11	78075258	78104125	7439	-		2962	86.75	11.66		3667	126.74	17.03		5470	253.61	34.09		8796	397.42	53.42
1133	Rpain	RPA-interacting protein	NM_027186	11	70783715	70791306	1093	-		271	7.93	7.25		151	5.21	4.76		193	8.94	8.17		559	25.25	23.1
1134	Ramp2	receptor activity-modifying protein 2	NM_019444	11	101107648	101109564	872	-		67	1.96	2.24		79	2.73	3.13		12	0.55	0.63		14	0.63	0.72
1135	Car4	carbonic anhydrase 4 precursor	NM_007607	11	84771345	84779543	1201	-		21	0.61	0.5		10	0.34	0.28		5	0.23	0.19		29	1.31	1.09
1136	Fn3krp	ketosamine-3-kinase	NM_181420	11	121282752	121292077	2024	-		5	0.14	0.06		24	0.82	0.4		133	6.16	3.04		290	13.1	6.47
1137	Psme4	proteasome (prosome, macropain) activator	NM_134013	11	30671775	30780361	6454	-		17656	517.14	80.12		13129	453.78	70.3		3618	167.74	25.99		7960	359.65	55.72
1138	Mapk9	mitogen-activated protein kinase 9 isoform	NM_016961, NM_001163672, NM_001163671, NM_207692	11	49660256	49699598	4356	-		2872	84.12	19.31		2780	96.08	22.05		943	43.72	10.03		1408	63.61	14.6
1139	Tmem104	transmembrane protein 104	NM_001033393	11	115048841	115107952	4139	-		1176	34.44	8.32		1412	48.8	11.79		3180	147.44	35.62		239	10.79	2.6
1140	Igfbp4	insulin-like growth factor-binding protein 4	NM_010517	11	98902574	98913957	2069	-		5	0.14	0.06		1	0.03	0.01		689	31.94	15.43		371	16.76	8.1
1141	Slc16a3	monocarboxylate transporter 4	NM_001038653, NM_030696, NM_001038654	11	120809798	120820314	2493	-		33	0.96	0.38		24	0.82	0.32		1975	91.57	36.73		1996	90.18	36.17
1142	Rundc3a	RUN domain-containing protein 3A	NM_016759	11	102254990	102263867	1808	-		31	0.9	0.49		41	1.41	0.77		1427	66.16	36.59		445	20.1	11.11
1143	Gm12253	hypothetical protein LOC624860	NM_001045542	11	58246061	58255124	1356	-		6	0.17	0.12		2	0.06	0.04		0	0	0		0	0	0
1144	Rapgefl1	rap guanine nucleotide exchange factor-like 1	NM_001080925	11	98698099	98714319	4163	-		4011	117.48	28.22		4209	145.47	34.94		29	1.34	0.32		31	1.4	0.33
1145	Fam161a	hypothetical protein LOC73873	NM_028672	11	22913387	22923731	1941	-		1094	32.04	16.5		679	23.46	12.08		1276	59.16	30.47		77	3.47	1.78
1146	Ssh2	protein phosphatase Slingshot homolog 2	NM_177710	11	77029927	77269050	4368	-		2099	61.48	14.07		1758	60.76	13.91		399	18.49	4.23		2218	100.21	22.94
1147	1810043H04Rik	hypothetical protein LOC208501	NM_001110242	11	119960248	119961738	494	-		305	8.93	18.07		298	10.29	20.82		220	10.2	20.64		260	11.74	23.76
1148	Gpr142	probable G-protein coupled receptor 142	NM_181749	11	114660238	114668059	1098	-		14	0.41	0.37		14	0.48	0.43		0	0	0		0	0	0
1149	Tax1bp3	tax1-binding protein 3	NM_029564	11	72990585	72995548	1417	-		321	9.4	6.63		192	6.63	4.67		203	9.41	6.64		53	2.39	1.68
1150	Cox11	cytochrome c oxidase assembly protein COX11,	NM_199008	11	90499498	90507291	2259	-		186	5.44	2.4		142	4.9	2.16		120	5.56	2.46		711	32.12	14.21
1151	Fbxo39	F-box only protein 39	NM_001099688	11	72127946	72132921	1711	-		23	0.67	0.39		24	0.82	0.47		67	3.1	1.81		4	0.18	0.1
1152	Slc46a1	proton-coupled folate transporter	NM_026740	11	78279220	78285432	1942	-		12	0.35	0.18		25	0.86	0.44		610	28.28	14.56		159	7.18	3.69
1153	Sf3a1	splicing factor 3A subunit 1	NM_026175	11	4060357	4082544	4916	-		10811	316.65	64.41		8281	286.21	58.22		1040	48.21	9.8		8049	363.67	73.97
1154	Rara	retinoic acid receptor alpha isoform 1	NM_009024, NM_001177303, NM_001176528, NM_001177302	11	98799010	98836256	3251	-		490	14.35	4.41		279	9.64	2.96		747	34.63	10.65		2156	97.41	29.96
1155	Psmd3	26S proteasome non-ATPase regulatory subunit 3	NM_009439	11	98543868	98557292	2167	-		4337	127.03	58.62		4661	161.09	74.33		1534	71.12	32.81		8605	388.79	179.41
1156	Afmid	probable arylformamidase	NM_027827	11	117687238	117701219	2332	-		267	7.82	3.35		281	9.71	4.16		200	9.27	3.97		152	6.86	2.94
1157	Gm11992	hypothetical protein LOC626870	NM_001037928	11	8948595	8969357	2400	-		12	0.35	0.14		6	0.2	0.08		46	2.13	0.88		10	0.45	0.18
1158	Olfr1394	olfactory receptor 1394	NM_146276	11	48973518	48974456	939	-		0	0	0		0	0	0		0	0	0		0	0	0
1159	Cpeb4	cytoplasmic polyadenylation element-binding	NM_026252	11	31772211	31831577	2312	-		607	17.77	7.68		404	13.96	6.03		1184	54.89	23.74		114	5.15	2.22
1160	Slc43a2	large neutral amino acids transporter small	NM_173388	11	75345212	75388543	4389	-		43	1.25	0.28		41	1.41	0.32		3112	144.28	32.87		237	10.7	2.43
1161	Pnpt1	polyribonucleotide nucleotidyltransferase 1,	NM_027869	11	29030751	29061828	2704	-		595	17.42	6.44		416	14.37	5.31		274	12.7	4.69		2044	92.35	34.15
1162	Ogdh	oxoglutarate (alpha-ketoglutarate) dehydrogenase	NM_010956	11	6191600	6259096	6614	-		5363	157.08	23.74		5825	201.33	30.43		4124	191.21	28.9		6027	272.31	41.17
1163	Kif19a	kinesin-like protein KIF19	NM_001102615	11	114626703	114651889	3433	-		8	0.23	0.06		4	0.13	0.03		55	2.55	0.74		4	0.18	0.05
1164	Gip	GIP-like	NM_008119	11	95885859	95892142	649	-		0	0	0		0	0	0		8	0.37	0.57		3	0.13	0.2
1165	Wnt9a	protein Wnt-9a precursor	NM_139298	11	59120432	59147054	3318	-		4	0.11	0.03		57	1.97	0.59		38	1.76	0.53		45	2.03	0.61
1166	Slc6a4	sodium-dependent serotonin transporter	NM_010484	11	76812099	76845843	2744	-		954	27.94	10.18		1186	40.99	14.93		12	0.55	0.2		3	0.13	0.04
1167	Rhbdd3	rhomboid domain-containing protein 3	NM_177370	11	4999441	5006094	1821	-		45	1.31	0.71		73	2.52	1.38		371	17.2	9.44		431	19.47	10.69
1168	Mbtd1	MBT domain-containing protein 1	NM_134012	11	93747533	93808298	5231	-		12819	375.47	71.77		9198	317.91	60.77		367	17.01	3.25		2034	91.9	17.56
1169	Mettl2	methyltransferase-like protein 2	NM_172567	11	104987801	105001710	1824	-		43	1.25	0.68		50	1.72	0.94		154	7.14	3.91		1040	46.99	25.76
1170	Ywhae	14-3-3 protein epsilon	NM_009536	11	75546441	75579340	2023	-		21247	622.32	307.62		13122	453.53	224.18		6201	287.51	142.12		35552	1606.33	794.03
1171	Olfr319	olfactory receptor 319	NM_146500	11	58515205	58516125	921	-		0	0	0		0	0	0		0	0	0		0	0	0
1172	Baiap2	brain-specific angiogenesis inhibitor	NM_001037754, NM_130862, NM_001037755	11	119804406	119868093	3186	-		179	5.24	1.64		248	8.57	2.68		1542	71.49	22.43		364	16.44	5.16
1173	Ppia	peptidyl-prolyl cis-trans isomerase A	NM_008907	11	6315873	6319813	736	-		293	8.58	11.65		359	12.4	16.84		2566	118.97	161.64		7849	354.63	481.83
1174	Slfn4	schlafen 4	NM_011410	11	82988688	83003718	3972	-		0	0	0		0	0	0		39	1.8	0.45		4	0.18	0.04
1175	Crhr1	corticotropin-releasing factor receptor 1	NM_007762	11	103994196	104036832	2428	-		8	0.23	0.09		7	0.24	0.09		0	0	0		0	0	0
1176	Hoxb13	homeobox protein Hox-B13	NM_008267	11	96055675	96057913	1313	-		1	0.02	0.01		2	0.06	0.04		0	0	0		8	0.36	0.27
1177	Olfr397	olfactory receptor 397	NM_146346	11	73778112	73779059	948	-		0	0	0		0	0	0		0	0	0		0	0	0
1178	Car10	carbonic anhydrase-related protein 10	NM_028296	11	92960763	93463018	3132	-		1522	44.57	14.23		1013	35.01	11.17		0	0	0		2	0.09	0.02
1179	Olfr311	olfactory receptor 311	NM_146537	11	58654618	58655544	927	-		0	0	0		0	0	0		0	0	0		0	0	0
1180	Slc16a11	monocarboxylate transporter 11	NM_153081, NM_001114971, NM_001114970	11	70027412	70029916	2010	-		94	2.75	1.36		78	2.69	1.33		14	0.64	0.31		2	0.09	0.04
1181	Gltpd2	glycolipid transfer protein domain-containing	NM_146020	11	70332711	70334238	1217	-		0	0	0		0	0	0		0	0	0		4	0.18	0.14
1182	Nup85	nuclear pore complex protein Nup85	NM_001002929	11	115425758	115445226	2147	-		7421	217.36	101.23		6349	219.44	102.2		380	17.61	8.2		4088	184.7	86.02
1183	Gm525	hypothetical protein LOC217071 precursor	NM_001033266	11	88935155	88954378	581	-		0	0	0		0	0	0		83	3.84	6.6		1	0.04	0.06
1184	Olfr59	olfactory receptor 59	NM_011002	11	74102150	74103121	972	-		0	0	0		0	0	0		0	0	0		0	0	0
1185	C1d	nuclear nucleic acid-binding protein C1D	NM_020558	11	17157621	17169179	2957	-		33	0.96	0.32		61	2.1	0.71		292	13.53	4.57		643	29.05	9.82
1186	Myo18a	myosin-XVIIIa	NM_011586	11	77590767	77679482	7304	-		5254	153.89	21.06		6091	210.52	28.82		1628	75.48	10.33		2959	133.69	18.3
1187	Nos2	nitric oxide synthase, inducible	NM_010927	11	78734361	78773626	3990	-		30	0.87	0.21		30	1.03	0.25		6	0.27	0.06		3	0.13	0.03
1188	Olfr1391	olfactory receptor 1391	NM_146468	11	49140915	49141850	936	-		0	0	0		0	0	0		0	0	0		0	0	0
1189	Ggt6	gamma-glutamyltransferase 6 precursor	NM_027819	11	72249028	72251906	1841	-		0	0	0		0	0	0		0	0	0		8	0.36	0.19
1190	Ube2g1	ubiquitin-conjugating enzyme E2G 1	NM_025985	11	72420763	72499983	3837	-		15741	461.05	120.15		12633	436.63	113.79		694	32.17	8.38		1878	84.85	22.11
1191	Alox12b	arachidonate 12-lipoxygenase, 12R-type	NM_009659	11	68970574	68983293	2347	-		0	0	0		0	0	0		4	0.18	0.07		12	0.54	0.23
1192	Crk	Crk, isoform B	NM_133656	11	75492812	75519594	3620	-		7537	220.76	60.98		4791	165.59	45.74		1696	78.63	21.72		3214	145.21	40.11
1193	Ift20	intraflagellar transport protein 20 homolog	NM_018854	11	78349938	78354975	802	-		360	10.54	13.14		287	9.91	12.35		609	28.23	35.19		646	29.18	36.38
1194	Lrrc59	leucine-rich repeat-containing protein 59	NM_133807	11	94491138	94506530	2810	-		8639	253.03	90.04		9032	312.17	111.09		2825	130.98	46.61		8738	394.8	140.49
1195	Sdf2	stromal cell-derived factor 2	NM_009143	11	78059248	78068988	1300	-		3170	92.85	71.42		2203	76.14	58.56		820	38.01	29.23		1230	55.57	42.74
1196	Olfr1388	olfactory receptor 1388	NM_146467	11	49257355	49258290	936	-		0	0	0		0	0	0		0	0	0		0	0	0
1197	Smek2	serine/threonine-protein phosphatase 4	NM_134034	11	29072996	29119131	3370	-		1361	39.86	11.82		1118	38.64	11.46		643	29.81	8.84		1556	70.3	20.86
1198	Dullard	serine/threonine-protein phosphatase dullard	NM_026017	11	69794670	69804102	1615	-		606	17.74	10.98		579	20.01	12.39		1235	57.26	35.45		998	45.09	27.91
1199	Tbc1d9b	TBC1 domain family member 9B	NM_029745	11	49944862	49986287	5225	-		1037	30.37	5.81		1149	39.71	7.6		2156	99.96	19.13		568	25.66	4.91
1200	Tmc8	transmembrane channel-like protein 8 isoform D	NM_001195090, NM_001195089, NM_001195088, NM_181856	11	117644364	117654342	2465	-		2	0.05	0.02		3	0.1	0.04		33	1.53	0.62		132	5.96	2.41
1201	Sp6	transcription factor Sp6	NM_031183	11	96874883	96886048	3389	-		3	0.08	0.02		6	0.2	0.05		4	0.18	0.05		206	9.3	2.74
1202	Hoxb2	homeobox protein Hox-B2	NM_134032	11	96212946	96215328	1631	-		5	0.14	0.08		3	0.1	0.06		331	15.34	9.4		0	0	0
1203	Srsf1	serine/arginine-rich splicing factor 1 isoform	NM_001078167, NM_173374	11	87861173	87867259	5262	-		3369	98.67	18.75		2176	75.2	14.29		1505	69.77	13.25		15629	706.16	134.19
1204	Aanat	arylalkylamine N-acetyltransferase	NM_009591	11	116455001	116458858	1217	-		18	0.52	0.42		25	0.86	0.7		0	0	0		0	0	0
1205	1810027O10Rik	hypothetical protein LOC69186 precursor	NM_026982	11	69652027	69653060	431	-		91	2.66	6.17		84	2.9	6.72		762	35.33	81.97		796	35.96	83.43
1206	Coro6	coronin-6 isoform B	NM_139128, NM_139129, NM_139130	11	77277415	77283003	1416	-		11	0.32	0.22		26	0.89	0.62		1	0.04	0.02		11	0.49	0.34
1207	Fxr2	fragile X mental retardation syndrome-related	NM_011814	11	69446473	69466799	3002	-		9483	277.75	92.52		8334	288.05	95.95		884	40.98	13.65		6261	282.88	94.23
1208	Pank3	pantothenate kinase 3	NM_145962	11	35582997	35604787	7365	-		510	14.93	2.02		687	23.74	3.22		1157	53.64	7.28		1528	69.03	9.37
1209	Slit3	slit homolog 3 protein precursor	NM_011412	11	34934960	35521814	4801	-		449	13.15	2.73		501	17.31	3.6		517	23.97	4.99		113	5.1	1.06
1210	Slu7	pre-mRNA-splicing factor SLU7	NM_148673, NM_198936	11	43247233	43261483	3732	-		3219	94.28	25.26		2461	85.06	22.79		718	33.29	8.92		1441	65.1	17.44
1211	Gm11567	hypothetical protein LOC670533	NM_001101613	11	99740501	99741543	1043	-		0	0	0		0	0	0		0	0	0		0	0	0
1212	Llgl1	lethal(2) giant larvae protein homolog 1 isoform	NM_008502, NM_001159404, NM_001159405	11	60513342	60527688	4279	-		2180	63.85	14.92		2056	71.06	16.6		461	21.37	4.99		2207	99.71	23.3
1213	Zfp652	zinc finger protein 652	NM_201609	11	95610381	95626027	2668	-		701	20.53	7.69		495	17.1	6.4		360	16.69	6.25		565	25.52	9.56
1214	Dbil5	diazepam-binding inhibitor-like 5	NM_021294	11	76031115	76032167	575	-		8	0.23	0.4		8	0.27	0.46		62573	2901.21	5045.58		5	0.22	0.38
1215	4933439F18Rik	hypothetical protein LOC66771	NM_025757	11	60230805	60258779	4264	-		3697	108.28	25.39		3962	136.93	32.11		723	33.52	7.86		1503	67.9	15.92
1216	Krtap9-5	keratin associated protein 9-5	NM_001085527	11	99809789	99810865	1077	-		0	0	0		0	0	0		0	0	0		0	0	0
1217	Wnt3	wingless-type MMTV integration site family,	NM_009521	11	103635538	103679271	3000	-		2	0.05	0.01		7	0.24	0.08		7061	327.38	109.12		4	0.18	0.06
1218	Fam71b	family with sequence similarity 71, member B	NM_001013783	11	46218232	46221484	2185	-		0	0	0		0	0	0		188	8.71	3.98		0	0	0
1219	Ccdc103	coiled-coil domain-containing protein 103	NM_028492	11	102742558	102746529	1800	-		18	0.52	0.28		9	0.31	0.17		82	3.8	2.11		9	0.4	0.22
1220	Irf1	interferon regulatory factor 1 isoform a	NM_001159396, NM_008390, NM_001159393	11	53583580	53590825	2072	-		7215	211.32	101.98		5525	190.96	92.16		446	20.67	9.97		902	40.75	19.66
1221	Taf15	TATA-binding protein-associated factor 2N	NM_027427	11	83286610	83320242	2049	-		2004	58.69	28.64		1222	42.23	20.61		770	35.7	17.42		6583	297.43	145.15
1222	Rtn4	reticulon-4 isoform A	NM_194053, NM_194054, NM_194052, NM_024226, NM_194051	11	29592947	29642916	4619	-		1144	33.5	7.25		1145	39.57	8.56		5852	271.32	58.73		12491	564.37	122.18
1223	Vamp2	vesicle-associated membrane protein 2	NM_009497	11	68902030	68905883	2164	-		14	0.41	0.18		11	0.38	0.17		754	34.95	16.15		656	29.63	13.69
1224	Phf12	PHD finger protein 12	NM_174852	11	77796715	77844037	4015	-		9146	267.88	66.71		7861	271.7	67.67		669	31.01	7.72		2444	110.42	27.5
1225	9530068E07Rik	keratinocyte-associated transmembrane protein 2	NM_153117	11	52209930	52222225	2467	-		6295	184.38	74.73		5328	184.15	74.64		2120	98.29	39.84		910	41.11	16.66
1226	1700020L24Rik	hypothetical protein LOC66330	NM_025492	11	83251196	83254734	931	-		0	0	0		0	0	0		327	15.16	16.28		41	1.85	1.98
1227	Olfr412	olfactory receptor 412	NM_001011851	11	74178173	74179111	939	-		0	0	0		0	0	0		0	0	0		0	0	0
1228	1110005A03Rik	hypothetical protein LOC74319	NM_028865	11	116704914	116711045	1000	-		236	6.91	6.91		185	6.39	6.39		138	6.39	6.39		182	8.22	8.22
1229	Ankrd40	ankyrin repeat domain 40	NM_027799, NM_146024	11	94189315	94203161	3493	-		2488	72.87	20.86		2128	73.55	21.05		1612	74.74	21.39		1509	68.18	19.51
1230	Gm12581	transmembrane protein ENSP00000364084 homolog	NM_001085535	11	117722066	117726857	1820	-		1	0.02	0.01		3	0.1	0.05		9	0.41	0.22		15	0.67	0.36
1231	Tcam1	testicular cell adhesion molecule 1	NM_029467	11	106137986	106149457	2985	-		207	6.06	2.03		251	8.67	2.9		128	5.93	1.98		22	0.99	0.33
1232	Itgb4	integrin beta-4 isoform 2	NM_001005608, NM_133663	11	115836039	115869725	6160	-		457	13.38	2.17		352	12.16	1.97		306	14.18	2.3		284	12.83	2.08
1233	Cdkl3	cyclin-dependent kinase-like 3 isoform 1	NM_001166655, NM_001166657, NM_001166656, NM_001166653, NM_153785, NM_001166654	11	51817824	51851667	2664	-		2	0.05	0.01		21	0.72	0.27		631	29.25	10.97		118	5.33	2
1234	Sec14l4	SEC14-like protein 4	NM_146013	11	3931785	3948012	2956	-		4	0.11	0.03		4	0.13	0.04		10	0.46	0.15		123	5.55	1.87
1235		hypothetical protein LOC216976	NM_001045522	11	78104343	78107247	959	-		2	0.05	0.05		3	0.1	0.1		28	1.29	1.34		6	0.27	0.28
1236	Col1a1	collagen alpha-1(I) chain precursor	NM_007742	11	94797584	94813170	4709	-		7	0.2	0.04		10	0.34	0.07		5173	239.84	50.93		3164	142.95	30.35
1237	Sap30l	histone deacetylase complex subunit SAP30L	NM_001081168	11	57615139	57624117	1549	-		1715	50.23	32.42		1444	49.9	32.21		257	11.91	7.68		486	21.95	14.17
1238	G6pc	glucose-6-phosphatase	NM_008061	11	101229044	101239217	2245	-		0	0	0		2	0.06	0.02		0	0	0		0	0	0
1239	Slfn5	schlafen family member 5	NM_183201	11	82765604	82776443	4076	-		0	0	0		1	0.03	0		1910	88.55	21.72		10	0.45	0.11
1240	Rnft1	RING finger and transmembrane domain-containing	NM_029788	11	86298159	86312509	4434	-		826	24.19	5.45		673	23.26	5.24		433	20.07	4.52		614	27.74	6.25
1241	Hoxb5	homeo box B5	NM_008268	11	96164826	96167435	1912	-		0	0	0		0	0	0		294	13.63	7.12		0	0	0
1242	Phb	prohibitin	NM_008831	11	95528304	95542087	1788	-		1310	38.37	21.45		1038	35.87	20.06		483	22.39	12.52		3210	145.03	81.11
1243	Rac3	ras-related C3 botulinum toxin substrate 3	NM_133223	11	120582782	120585283	1078	-		1038	30.4	28.2		804	27.78	25.76		41	1.9	1.76		96	4.33	4.01
1244	Chmp6	charged multivesicular body protein 6	NM_001085498	11	119775124	119780866	1561	-		12	0.35	0.22		25	0.86	0.55		586	27.17	17.4		712	32.17	20.6
1245	Rasl10b	ras-like protein family member 10B	NM_001013386	11	83223574	83234540	3481	-		14	0.41	0.11		9	0.31	0.08		18	0.83	0.23		77	3.47	0.99
1246	Adam19	ADAM metallopeptidase domain 19	NM_009616	11	45869489	45960844	6388	-		9	0.26	0.04		8	0.27	0.04		250	11.59	1.81		2560	115.66	18.1
1247	Mrps7	28S ribosomal protein S7, mitochondrial	NM_025305	11	115465465	115468938	1354	-		2158	63.2	46.67		1850	63.94	47.22		616	28.56	21.09		1498	67.68	49.98
1248	Myo15	myosin-XV isoform 1	NM_001103171, NM_010862, NM_182698	11	60282841	60341870	11769	-		13	0.38	0.03		12	0.41	0.03		152	7.04	0.59		9	0.4	0.03
1249	Fbxw10	F-box/WD repeat-containing protein 10	NM_001033669	11	62660625	62690964	3267	-		214	6.26	1.91		162	5.59	1.71		554	25.68	7.86		15	0.67	0.2
1250	Dhrs7c	dehydrogenase/reductase SDR family member 7C	NM_001013013	11	67611773	67629504	1129	-		0	0	0		0	0	0		0	0	0		0	0	0
1251	Ykt6	synaptobrevin homolog YKT6	NM_019661	11	5855835	5867783	2402	-		713	20.88	8.69		669	23.12	9.62		2577	119.48	49.74		3168	143.13	59.58
1252	Scrn2	secernin-2	NM_146027	11	96891308	96895274	1505	-		10	0.29	0.19		15	0.51	0.33		40	1.85	1.22		316	14.27	9.48
1253	Cd300lg	CMRF35-like molecule 9 isoform 2	NM_027987, NM_001160711, NM_001160713, NM_001160712	11	101902862	101916931	2309	-		12	0.35	0.15		20	0.69	0.29		60	2.78	1.2		0	0	0
1254	Olfr56	olfactory receptor 56	NM_010999	11	48864235	48948889	1930	-		10	0.29	0.15		6	0.2	0.1		256	11.86	6.14		44	1.98	1.02
1255	Unc119	protein unc-119 homolog A	NM_011676	11	78157024	78162658	1319	-		73	2.13	1.61		111	3.83	2.9		428	19.84	15.04		526	23.76	18.01
1256	Cd300a	CMRF35-like molecule 8	NM_170758	11	114751355	114765965	4642	-		1	0.02	0		0	0	0		2661	123.37	26.57		5	0.22	0.04
1257	Mks1	Meckel syndrome type 1 protein homolog	NM_001039684	11	87666727	87677181	2365	-		708	20.73	8.76		554	19.14	8.09		123	5.7	2.41		356	16.08	6.79
1258	A730011L01Rik	putative endonuclease FLJ39025 homolog isoform	NM_177394, NM_001164636	11	119353014	119372736	5057	-		60	1.75	0.34		71	2.45	0.48		242	11.22	2.21		164	7.4	1.46
1259	4933407P14Rik	signal peptide peptidase-like 2C isoform a	NM_001082535, NM_199019	11	104047641	104052480	2250	-		0	0	0		0	0	0		2900	134.45	59.75		0	0	0
1260	Olfr406-ps	olfactory receptor 406, pseudogene	NM_001011863	11	74082893	74083864	972	-		0	0	0		0	0	0		0	0	0		0	0	0
1261	Cnrip1	CB1 cannabinoid receptor-interacting protein 1	NM_029861	11	16951937	16979375	1569	-		0	0	0		8	0.27	0.17		127	5.88	3.74		4	0.18	0.11
1262	Vps54	vacuolar protein sorting-associated protein 54	NM_139061	11	21139284	21221136	4327	-		675	19.77	4.56		806	27.85	6.43		569	26.38	6.09		2042	92.26	21.32
1263	Galnt10	polypeptide N-acetylgalactosaminyltransferase	NM_134189	11	57458944	57601002	4725	-		4	0.11	0.02		6	0.2	0.04		1539	71.35	15.1		857	38.72	8.19
1264	Zkscan6	zinc finger protein 18	NM_026107	11	65620746	65642741	2353	-		4192	122.78	52.18		3045	105.24	44.72		256	11.86	5.04		199	8.99	3.82
1265	Nsg2	neuron-specific protein family member 2	NM_008741	11	31900459	31959202	2243	-		96	2.81	1.25		124	4.28	1.9		8	0.37	0.16		46	2.07	0.92
1266	Mprip	myosin phosphatase Rho-interacting protein	NM_012027, NM_201245	11	59476034	59589722	4043	-		12967	379.8	93.94		11548	399.13	98.72		3479	161.3	39.89		3524	159.22	39.38
1267	Spop	speckle-type POZ protein	NM_025287	11	95275397	95354724	2882	-		2702	79.14	27.46		2128	73.55	25.52		1960	90.87	31.53		1099	49.65	17.22
1268	Slfn1	schlafen 1	NM_011407	11	82930347	82936161	1881	-		0	0	0		0	0	0		58	2.68	1.42		1	0.04	0.02
1269	Hsf5	heat shock factor protein 5	NM_001045527	11	87430666	87473044	4158	-		1165	34.12	8.2		1146	39.6	9.52		683	31.66	7.61		9	0.4	0.09
1270	Rnf222	RING finger protein 222	NM_177060	11	68702055	68708517	2701	-		15	0.43	0.15		15	0.51	0.18		0	0	0		2	0.09	0.03
1271	Armc7	armadillo repeat-containing protein 7	NM_177778	11	115336991	115351780	2249	-		1212	35.49	15.78		937	32.38	14.39		173	8.02	3.56		227	10.25	4.55
1272	Unc45b	protein unc-45 homolog B	NM_178680	11	82724833	82756908	3610	-		2	0.05	0.01		2	0.06	0.01		458	21.23	5.88		4	0.18	0.04
1273	Hgs	hepatocyte growth factor-regulated tyrosine	NM_008244, NM_001159328	11	120329005	120345291	2858	-		6952	203.62	71.24		7021	242.66	84.9		1591	73.76	25.8		1956	88.37	30.92
1274	Olfr1393	olfactory receptor 1393	NM_146471	11	49093652	49094587	936	-		0	0	0		0	0	0		1	0.04	0.04		0	0	0
1275	Slfn3	schlafen 3	NM_011409	11	83004832	83028656	1834	-		0	0	0		0	0	0		41	1.9	1.03		31	1.4	0.76
1276	Mapt	microtubule-associated protein tau isoform a	NM_001038609, NM_010838	11	104092750	104193407	5387	-		124	3.63	0.67		140	4.83	0.89		36	1.66	0.3		1320	59.64	11.07
1277	Rpl38	60S ribosomal protein L38	NM_023372, NM_001048058, NM_001048057	11	114529857	114533645	387	-		552	16.16	41.75		429	14.82	38.29		3205	148.6	383.97		5410	244.43	631.6
1278	3010026O09Rik	hypothetical protein LOC68067	NM_026543	11	49988353	50013611	1133	-		2560	74.98	66.17		2265	78.28	69.09		125	5.79	5.11		269	12.15	10.72
1279	Patz1	POZ-, AT hook-, and zinc finger-containing	NM_019574	11	3190460	3208520	2534	-		3624	106.14	41.88		3219	111.25	43.9		555	25.73	10.15		2965	133.96	52.86
1280	Camkk1	calcium/calmodulin-dependent protein kinase	NM_018883	11	72832510	72855567	3466	-		14	0.41	0.11		11	0.38	0.1		145	6.72	1.93		106	4.78	1.37
1281	Mgat4b	alpha-1,3-mannosyl-glycoprotein	NM_145926	11	50039135	50048152	1678	-		1429	41.85	24.94		1311	45.31	27		998	46.27	27.57		525	23.72	14.13
1282	Npb	neuropeptide B precursor	NM_153288	11	120469791	120470414	549	-		1	0.02	0.03		2	0.06	0.1		8	0.37	0.67		15	0.67	1.22
1283	Cbx1	chromobox protein homolog 1	NM_007622	11	96650450	96669954	1274	-		2687	78.7	61.77		2103	72.68	57.04		673	31.2	24.48		7913	357.53	280.63
1284	B230217C12Rik	hypothetical protein LOC68127	NM_001080935	11	97702094	97704357	1189	-		0	0	0		1	0.03	0.02		11	0.51	0.42		26	1.17	0.98
1285	Shpk	sedoheptulokinase	NM_029031	11	73012984	73038008	2781	-		20	0.58	0.2		14	0.48	0.17		147	6.81	2.44		20	0.9	0.32
1286	Olfr390	olfactory receptor 390	NM_146347	11	73600442	73601377	936	-		1	0.02	0.02		0	0	0		0	0	0		0	0	0
1287	Tsen54	tRNA splicing endonuclease 54 homolog	NM_029557	11	115676053	115684416	1972	-		436	12.77	6.47		362	12.51	6.34		120	5.56	2.81		860	38.85	19.7
1288	Kcnj16	inward rectifier potassium channel 16	NM_010604	11	110829347	110889281	3623	-		0	0	0		0	0	0		2	0.09	0.02		1	0.04	0.01
1289	Mis12	Mis12	NM_025993	11	70833113	70840636	2766	-		3401	99.61	36.01		2786	96.29	34.81		345	15.99	5.78		1518	68.58	24.79
1290	Sco1	SCO cytochrome oxidase deficient homolog 1	NM_001040026	11	66866172	66880942	4280	-		145	4.24	0.99		151	5.21	1.21		124	5.74	1.34		1026	46.35	10.82
1291	Kcnj12	ATP-sensitive inward rectifier potassium channel	NM_010603	11	60879306	60884633	2463	-		0	0	0		0	0	0		0	0	0		165	7.45	3.02
1292	Rnmtl1	RNA methyltransferase-like protein 1	NM_183263	11	76057238	76064124	1492	-		3	0.08	0.05		14	0.48	0.32		70	3.24	2.17		283	12.78	8.56
1293	Rabep1	rab GTPase-binding effector protein 1	NM_019400	11	70658427	70754442	3095	-		1874	54.88	17.73		1157	39.98	12.91		557	25.82	8.34		1013	45.77	14.78
1294	Galr2	galanin receptor type 2	NM_010254	11	116142253	116145252	1957	-		5	0.14	0.07		11	0.38	0.19		19	0.88	0.44		12	0.54	0.27
1295	Coasy	bifunctional coenzyme A synthase	NM_027896	11	100943939	100947933	2386	-		853	24.98	10.46		1153	39.85	16.7		518	24.01	10.06		820	37.04	15.52
1296	Timm22	mitochondrial import inner membrane translocase	NM_023355, NM_019818	11	76220692	76229794	2770	-		22	0.64	0.23		28	0.96	0.34		401	18.59	6.71		686	30.99	11.18
1297	Fkbp10	peptidyl-prolyl cis-trans isomerase FKBP10	NM_001163481, NM_010221	11	100277011	100286139	2597	-		5	0.14	0.05		12	0.41	0.15		202	9.36	3.6		393	17.75	6.83
1298	Wdr92	WD repeat-containing protein 92	NM_178909	11	17111896	17135203	3431	-		1753	51.34	14.96		1228	42.44	12.36		111	5.14	1.49		1043	47.12	13.73
1299	Engase	cytosolic endo-beta-N-acetylglucosaminidase	NM_172573	11	118338274	118350512	3924	-		60	1.75	0.44		38	1.31	0.33		159	7.37	1.87		434	19.6	4.99
1300	Col23a1	collagen alpha-1(XXIII) chain	NM_153393	11	51103422	51397427	5665	-		155	4.53	0.79		78	2.69	0.47		105	4.86	0.85		11	0.49	0.08
1301	Osbpl7	oxysterol-binding protein-related protein 7	NM_001081434	11	96912134	96930218	3535	-		132	3.86	1.09		196	6.77	1.91		588	27.26	7.71		348	15.72	4.44
1302	Hoxb3	homeobox protein Hox-B3	NM_010458, NM_001079869	11	96184440	96209244	3390	-		3	0.08	0.02		7	0.24	0.07		402	18.63	5.49		1	0.04	0.01
1303	Suz12	polycomb protein Suz12 isoform 2	NM_199196, NM_001163018	11	79806608	79847625	4448	-		13477	394.74	88.74		8307	287.11	64.54		530	24.57	5.52		6421	290.11	65.22
1304	Snf8	vacuolar-sorting protein SNF8	NM_033568	11	95896231	95908719	947	-		669	19.59	20.68		466	16.1	17		768	35.6	37.59		1343	60.68	64.07
1305	Ttyh2	protein tweety homolog 2	NM_053273	11	114536782	114582298	3456	-		93	2.72	0.78		92	3.17	0.91		2305	106.87	30.92		785	35.46	10.26
1306	Mrpl55	39S ribosomal protein L55, mitochondrial	NM_026035	11	59016019	59019504	780	-		826	24.19	31.01		859	29.68	38.05		308	14.28	18.3		681	30.76	39.43
1307	Ccl12	C-C motif chemokine 12 precursor	NM_011331	11	81915347	81916901	537	-		0	0	0		0	0	0		31	1.43	2.66		0	0	0
1308	1700016K19Rik	hypothetical protein LOC74230	NM_198637	11	75813414	75817071	941	-		51	1.49	1.58		28	0.96	1.02		618	28.65	30.44		9	0.4	0.42
1309	Vstm2a	V-set and transmembrane domain-containing	NM_145967	11	16157775	16184189	3229	-		3	0.08	0.02		6	0.2	0.06		7	0.32	0.09		9	0.4	0.12
1310	P2rx5	purinergic receptor P2X5	NM_033321	11	72974027	72986187	2298	-		5	0.14	0.06		4	0.13	0.05		10	0.46	0.2		36	1.62	0.7
1311	Gast	gastrin precursor	NM_010257	11	100195726	100198310	455	-		10	0.29	0.63		14	0.48	1.05		2	0.09	0.19		0	0	0
1312	Scgb3a1	secretoglobin family 3A member 1 type A	NM_054037, NM_170727	11	49477112	49478620	630	-		11	0.32	0.5		15	0.51	0.8		0	0	0		0	0	0
1313	Nudcd2	nudC domain-containing protein 2	NM_026023	11	40547144	40553549	1618	-		259	7.58	4.68		235	8.12	5.01		293	13.58	8.39		2603	117.61	72.68
1314	Hnf1b	hepatocyte nuclear factor 1-beta	NM_009330	11	83664371	83719317	2742	-		212	6.2	2.26		314	10.85	3.95		441	20.44	7.45		2	0.09	0.03
1315	Trim25	E3 ubiquitin/ISG15 ligase TRIM25	NM_009546	11	88860717	88881607	5596	-		3	0.08	0.01		3	0.1	0.01		1546	71.68	12.8		7450	336.61	60.15
1316	Flot2	flotillin-2 isoform 1	NM_008028, NM_001040403	11	77851443	77873934	2718	-		2148	62.91	23.14		2526	87.3	32.11		1047	48.54	17.85		2132	96.32	35.43
1317	Mrpl22	39S ribosomal protein L22, mitochondrial	NM_175001	11	57985163	57993067	722	-		1041	30.49	42.22		648	22.39	31.01		216	10.01	13.86		630	28.46	39.41
1318	Trim17	E3 ubiquitin-protein ligase TRIM17	NM_031172	11	58777283	58785231	1710	-		15	0.43	0.25		20	0.69	0.4		858	39.78	23.26		0	0	0
1319	Mtif2	translation initiation factor IF-2,	NM_133767	11	29426457	29445255	2748	-		324	9.49	3.45		271	9.36	3.4		275	12.75	4.63		758	34.24	12.45
1320	Smcr7	Smith-Magenis syndrome chromosomal region	NM_001009927	11	60541900	60546453	2522	-		3	0.08	0.03		16	0.55	0.21		134	6.21	2.46		428	19.33	7.66
1321	Msl1	male-specific lethal 1 homolog	NM_028722	11	98657083	98669173	4358	-		4013	117.54	26.97		3317	114.64	26.3		1896	87.9	20.16		1469	66.37	15.22
1322	Vtn	vitronectin precursor	NM_011707	11	78312788	78315826	1586	-		33	0.96	0.6		35	1.2	0.75		6	0.27	0.17		0	0	0
1323	Zrsr1	U2 small nuclear ribonucleoprotein auxiliary	NM_011663	11	22872029	22874908	2880	-		22	0.64	0.22		21	0.72	0.25		419	19.42	6.74		562	25.39	8.81
1324	Tex14	testis-expressed protein 14 isoform a	NM_031386	11	87218567	87369325	4776	-		536	15.69	3.28		676	23.36	4.89		110	5.1	1.06		1543	69.71	14.59
1325	Lif	leukemia inhibitory factor isoform a	NM_008501, NM_001039537	11	4157571	4172517	4015	-		0	0	0		3	0.1	0.02		15	0.69	0.17		341	15.4	3.83
1326	Tcap	telethonin	NM_011540	11	98245125	98246267	948	-		0	0	0		0	0	0		6	0.27	0.28		0	0	0
1327	Pik3r5	phosphoinositide 3-kinase regulatory subunit 5	NM_177320	11	68245627	68311348	4363	-		1	0.02	0		0	0	0		2203	102.14	23.41		22	0.99	0.22
1328	Gps1	COP9 signalosome complex subunit 1 isoform 2	NM_145370, NM_001177874	11	120645829	120650416	2018	-		1941	56.85	28.17		1752	60.55	30		683	31.66	15.68		1354	61.17	30.31
1329	Rab11fip4	rab11 family-interacting protein 4	NM_175543	11	79404714	79507514	3145	-		2535	74.25	23.6		2223	76.83	24.42		665	30.83	9.8		968	43.73	13.9
1330	Blmh	bleomycin hydrolase	NM_178645	11	76759260	76800878	2240	-		2245	65.75	29.35		2476	85.57	38.2		549	25.45	11.36		4326	195.46	87.25
1331	Tusc5	tumor suppressor candidate 5 homolog	NM_177709	11	76493375	76512162	3233	-		0	0	0		2	0.06	0.01		0	0	0		2	0.09	0.02
1332	Hexdc	hexosaminidase D isoform 1	NM_001001333, NM_001146073	11	121069017	121083961	1933	-		1133	33.18	17.16		981	33.9	17.53		242	11.22	5.8		156	7.04	3.64
1333	Ttc25	tetratricopeptide repeat protein 25	NM_028918	11	100406946	100433880	2818	-		5	0.14	0.04		1	0.03	0.01		647	29.99	10.64		46	2.07	0.73
1334	Krtap4-9	keratin associated protein 4 family member	NM_001085548	11	99646514	99647571	1058	-		0	0	0		0	0	0		0	0	0		0	0	0
1335	Fam57a	family with sequence similarity 57, member A	NM_027773	11	76015558	76021759	930	-		455	13.32	14.32		320	11.06	11.89		21	0.97	1.04		44	1.98	2.12
1336	Map3k3	mitogen-activated protein kinase kinase kinase	NM_011947	11	105946216	106016748	3161	-		19	0.55	0.17		58	2	0.63		991	45.94	14.53		1135	51.28	16.22
1337	Butr1	butyrophilin related 1	NM_138678	11	58731559	58740467	1028	-		0	0	0		0	0	0		0	0	0		0	0	0
1338	Rilp	rab-interacting lysosomal protein	NM_001029938	11	75323596	75326668	1489	-		76	2.22	1.49		68	2.35	1.57		41	1.9	1.27		17	0.76	0.51
1339	Slc9a3r1	Na(+)/H(+) exchange regulatory cofactor NHE-RF1	NM_012030	11	115024655	115042492	1922	-		1016	29.75	15.47		1033	35.7	18.57		7514	348.38	181.25		1700	76.81	39.96
1340	Ccl11	eotaxin precursor	NM_011330	11	81871334	81876457	1073	-		37	1.08	1		25	0.86	0.8		5	0.23	0.21		4	0.18	0.16
1341	Havcr1	hepatitis A virus cellular receptor 1 homolog	NM_134248, NM_001166632, NM_001166631	11	46564679	46592115	918	-		70	2.05	2.23		90	3.11	3.38		1	0.04	0.04		0	0	0
1342	Sh3bp5l	SH3 domain-binding protein 5-like	NM_024480, NM_001161338	11	58144252	58161227	2980	-		28	0.82	0.27		39	1.34	0.44		789	36.58	12.27		993	44.86	15.05
1343	Cdk5r1	cyclin-dependent kinase 5 activator 1	NM_009871	11	80290548	80294681	4166	-		11	0.32	0.07		6	0.2	0.04		18	0.83	0.19		121	5.46	1.31
1344	Olfr1389	olfactory receptor 1389	NM_147066	11	49243980	49244915	936	-		0	0	0		0	0	0		0	0	0		0	0	0
1345	Aoc2	amine oxidase, copper containing 2	NM_178932	11	101186377	101191008	2553	-		7	0.2	0.07		13	0.44	0.17		16	0.74	0.28		126	5.69	2.22
1346	Gm11428	activated macrophage/microglia WAP domain	NM_001081957	11	83517558	83519771	485	-		0	0	0		0	0	0		631	29.25	60.3		1	0.04	0.08
1347	2810021J22Rik	hypothetical protein LOC69944	NM_172403	11	58680742	58697840	4966	-		146	4.27	0.85		160	5.53	1.11		170	7.88	1.58		194	8.76	1.76
1348	Mrpl10	39S ribosomal protein L10, mitochondrial	NM_026154	11	96902900	96910527	1682	-		1636	47.91	28.48		1360	47	27.94		882	40.89	24.31		1603	72.42	43.05
1349	Trim11	E3 ubiquitin-protein ligase TRIM11	NM_053168	11	58791618	58804960	2266	-		2524	73.92	32.62		2453	84.78	37.41		337	15.62	6.89		749	33.84	14.93
1350	Copz2	coatomer subunit zeta-2	NM_019877	11	96711190	96722516	937	-		349	10.22	10.9		219	7.56	8.06		264	12.24	13.06		93	4.2	4.48
1351	Aldoc	fructose-bisphosphate aldolase C	NM_009657	11	78137700	78140262	1702	-		15	0.43	0.25		8	0.27	0.15		408	18.91	11.11		493	22.27	13.08
1352	Zfp3	zinc finger protein 3	NM_177565	11	70577949	70586431	1838	-		635	18.59	10.11		312	10.78	5.86		36	1.66	0.9		37	1.67	0.9
1353	Neurl4	neuralized-like protein 4	NM_001013414	11	69715380	69727324	5203	-		824	24.13	4.63		866	29.93	5.75		761	35.28	6.78		1745	78.84	15.15
1354	Pigl	N-acetylglucosaminyl-phosphatidylinositol	NM_001039536	11	62271962	62327402	1657	-		136	3.98	2.4		110	3.8	2.29		122	5.65	3.4		538	24.3	14.66
1355	Trim37	E3 ubiquitin-protein ligase TRIM37	NM_197987	11	86940579	87034184	5649	-		2079	60.89	10.77		1832	63.31	11.2		1710	79.28	14.03		3498	158.04	27.97
1356	Taco1	translational activator of cytochrome c oxidase	NM_027346	11	105927421	105934926	1351	-		116	3.39	2.5		98	3.38	2.5		102	4.72	3.49		269	12.15	8.99
1357	Adam11	disintegrin and metalloproteinase	NM_001110778, NM_009613	11	102622753	102641576	5129	-		0	0	0		1	0.03	0		45	2.08	0.4		47	2.12	0.41
1358	Med11	mediator of RNA polymerase II transcription	NM_025397	11	70265433	70267228	903	-		934	27.35	30.28		464	16.03	17.75		220	10.2	11.29		555	25.07	27.76
1359	Ubtd2	ubiquitin domain-containing protein 2	NM_173784	11	32355372	32418709	3056	-		170	4.97	1.62		136	4.7	1.53		211	9.78	3.2		574	25.93	8.48
1360	Xpo1	exportin-1	NM_001035226, NM_134014	11	23156041	23197597	5144	-		5079	148.76	28.91		4923	170.15	33.07		881	40.84	7.93		11062	499.81	97.16
1361	Aebp1	adipocyte enhancer-binding protein 1 precursor	NM_009636	11	5761869	5772228	4049	-		13	0.38	0.09		16	0.55	0.13		1521	70.52	17.41		192	8.67	2.14
1362	Asb3	ankyrin repeat and SOCS box protein 3	NM_023906	11	30854398	31002704	3225	-		431	12.62	3.91		480	16.59	5.14		199	9.22	2.85		356	16.08	4.98
1363	G3bp1	GTPase activating protein (SH3 domain) binding	NM_013716	11	55283254	55314389	2685	-		831	24.34	9.06		721	24.92	9.28		777	36.02	13.41		10956	495.02	184.36
1364	Hoxb4	homeo box B4	NM_010459	11	96180053	96182944	2086	-		33	0.96	0.46		90	3.11	1.49		440	20.4	9.77		3	0.13	0.06
1365	Git1	ARF GTPase-activating protein GIT1	NM_001004144	11	77306914	77321276	3670	-		3720	108.95	29.68		3748	129.54	35.29		10919	506.26	137.94		3536	159.76	43.53
1366	Rnf43	RING finger protein 43	NM_172448	11	87476589	87549041	4336	-		668	19.56	4.51		698	24.12	5.56		300	13.9	3.2		7	0.31	0.07
1367	Olfr1392	olfactory receptor 1392	NM_146470	11	49106825	49107760	936	-		0	0	0		0	0	0		0	0	0		0	0	0
1368	2011-09-09	septin-9 isoform a	NM_017380, NM_001113486, NM_001113488, NM_001113487	11	117060975	117223639	3796	-		14	0.41	0.1		10	0.34	0.08		2660	123.33	32.48		4889	220.89	58.19
1369	Nbr1	next to BRCA1 gene 1 protein	NM_008676	11	101414172	101443259	4444	-		8622	252.54	56.82		6861	237.13	53.35		12478	578.54	130.18		3624	163.74	36.84
1370	Egfr	epidermal growth factor receptor, isoform B	NM_007912, NM_207655	11	16652206	16813910	5983	-		5228	153.12	25.59		2668	92.21	15.41		217	10.06	1.68		66	2.98	0.49
1371	Syngr2	synaptogyrin-2	NM_009304	11	117670995	117675595	1527	-		674	19.74	12.92		348	12.02	7.87		1737	80.53	52.73		1458	65.87	43.13
1372	Ap1b1	AP-1 complex subunit beta-1	NM_007454	11	4886908	4942732	3942	-		7832	229.4	58.19		7844	271.11	68.77		2486	115.26	29.23		2657	120.05	30.45
1373	Gabarap	gamma-aminobutyric acid receptor-associated	NM_019749	11	69804874	69808448	1152	-		302	8.84	7.67		236	8.15	7.07		7931	367.72	319.2		1140	51.5	44.7
1374	Ccl8	C-C motif chemokine 8 precursor	NM_021443	11	81928694	81930297	515	-		0	0	0		0	0	0		68	3.15	6.11		4	0.18	0.34
1375	Olfr403	olfactory receptor 403	NM_207622	11	74009007	74009948	942	-		0	0	0		0	0	0		0	0	0		0	0	0
1376	Dlx3	homeobox protein DLX-3	NM_010055	11	94981449	94986599	2631	-		0	0	0		1	0.03	0.01		0	0	0		18	0.81	0.3
1377	Arrb2	beta-arrestin-2	NM_145429	11	70246155	70254176	1728	-		1230	36.02	20.84		1112	38.43	22.23		1111	51.51	29.8		1575	71.16	41.18
1378	Ace	acetylcholine esterase, isoform B	NM_009598, NM_207624	11	105829261	105851259	4885	-		9	0.26	0.05		16	0.55	0.11		6332	293.58	60.09		62	2.8	0.57
1379	Olfr1385	olfactory receptor 1385	NM_001011805	11	49308037	49308966	930	-		0	0	0		0	0	0		0	0	0		0	0	0
1380	Osm	oncostatin-M precursor	NM_001013365	11	4136423	4141029	2272	-		0	0	0		0	0	0		62	2.87	1.26		430	19.42	8.54
1381	Cuedc1	CUE domain-containing protein 1 isoform 2	NM_198013	11	87912811	88006420	1796	-		150	4.39	2.44		55	1.9	1.05		479	22.2	12.36		108	4.87	2.71
1382	Igtp	interferon gamma induced GTPase	NM_018738	11	58013058	58021093	2020	-		7	0.2	0.09		3	0.1	0.04		147	6.81	3.37		448	20.24	10.01
1383	Stx8	syntaxin-8	NM_018768	11	67779985	68020650	4123	-		782	22.9	5.55		566	19.56	4.74		1021	47.33	11.47		505	22.81	5.53
1384	Gpx3	glutathione peroxidase 3 isoform 2	NM_001083929, NM_008161	11	54716355	54723889	1523	-		2034	59.57	39.11		1982	68.5	44.97		106969	4959.64	3256.49		207	9.35	6.13
1385	Mrpl12	39S ribosomal protein L12, mitochondrial	NM_027204	11	120345983	120350068	963	-		1987	58.19	60.42		1443	49.87	51.78		781	36.21	37.6		2530	114.31	118.7
1386	Gpr75	probable G-protein coupled receptor 75	NM_175490	11	30791097	30792719	1623	-		15	0.43	0.26		15	0.51	0.31		2	0.09	0.05		11	0.49	0.3
1387	Pgs1	CDP-diacylglycerol--glycerol-3-phosphate	NM_133757	11	117848171	117885325	2298	-		14150	414.45	180.35		15077	521.11	226.76		1282	59.44	25.86		2049	92.57	40.28
1388	Gcgr	glucagon receptor precursor	NM_008101	11	120392041	120400298	1929	-		0	0	0		0	0	0		3	0.13	0.06		3	0.13	0.06
1389	Mrpl45	39S ribosomal protein L45, mitochondrial	NM_025927	11	97177170	97191234	2289	-		878	25.71	11.23		854	29.51	12.89		352	16.32	7.12		2487	112.36	49.08
1390	Cdk12	cell division protein kinase 12 isoform 2	NM_026952, NM_001109628, NM_001109626	11	98064619	98114854	7669	-		6704	196.36	25.6		5212	180.14	23.48		466	21.6	2.81		3158	142.68	18.6
1391	Kif1c	kinesin-like protein KIF1C	NM_153103	11	70514050	70545472	6764	-		699	20.47	3.02		1150	39.74	5.87		5488	254.45	37.61		1938	87.56	12.94
1392	Fam100b	hypothetical protein LOC319370	NM_176902	11	116295408	116300391	1498	-		11	0.32	0.21		18	0.62	0.41		66	3.06	2.04		302	13.64	9.1
1393	Tanc2	protein TANC2	NM_181071	11	105451300	105790617	11864	-		2990	87.57	7.38		3463	119.69	10.08		998	46.27	3.9		334	15.09	1.27
1394	Sec14l1	SEC14-like 1 isoform 2	NM_001166507, NM_028777, NM_001166506	11	116976563	117020535	2745	-		1462	42.82	15.59		1739	60.1	21.89		3817	176.97	64.46		3118	140.87	51.31
1395	Zbtb4	zinc finger and BTB domain containing 4	NM_029348	11	69579414	69597528	7824	-		1	0.02	0		7	0.24	0.03		931	43.16	5.51		26	1.17	0.14
1396	2011-09-08	septin-8	NM_033144	11	53333302	53357598	4583	-		8	0.23	0.05		17	0.58	0.12		1165	54.01	11.78		885	39.98	8.72
1397	E130309D14Rik	hypothetical protein LOC432582	NM_001013784	11	74433107	74455018	4002	-		6	0.17	0.04		3	0.1	0.02		22	1.02	0.25		327	14.77	3.69
1398	Higd1b	HIG1 domain family member 1B	NM_080846	11	102697610	102699353	753	-		1	0.02	0.02		0	0	0		0	0	0		0	0	0
1399	Mgat1	UDP-GlcNAc:a-3-D-mannoside-beta-1,	NM_010794, NM_001110148, NM_001110149, NM_001110150	11	49057693	49076526	3165	-		1577	46.19	14.59		2095	72.41	22.87		1392	64.54	20.39		581	26.25	8.29
1400	Dvl2	dishevelled 2	NM_007888	11	69814128	69823611	2937	-		1298	38.01	12.94		1229	42.47	14.46		226	10.47	3.56		3598	162.56	55.34
1401	C1qtnf2	complement C1q tumor necrosis factor-related	NM_026979	11	43287846	43305027	1173	-		0	0	0		0	0	0		13	0.6	0.51		3	0.13	0.11
1402	Nhp2	H/ACA ribonucleoprotein complex subunit 2	NM_026631	11	51433275	51437216	1004	-		756	22.14	22.05		839	28.99	28.87		784	36.35	36.2		5495	248.27	247.28
1403	Plscr3	phospholipid scramblase 3	NM_001168497, NM_023564	11	69660178	69665560	2941	-		37	1.08	0.36		80	2.76	0.93		379	17.57	5.97		414	18.7	6.35
1404	Tmem17	transmembrane protein 17	NM_153596	11	22412286	22419234	1370	-		26	0.76	0.55		21	0.72	0.52		19	0.88	0.64		43	1.94	1.41
1405	Tlcd1	TLC domain-containing protein 1 precursor	NM_026708	11	77992268	77994274	1319	-		537	15.72	11.91		380	13.13	9.95		460	21.32	16.16		120	5.42	4.1
1406	Hnrnph1	heterogeneous nuclear ribonucleoprotein H	NM_021510	11	50191221	50200030	2242	-		1926	56.41	25.16		1822	62.97	28.08		1411	65.42	29.17		10042	453.72	202.37
1407	Kctd2	BTB/POZ domain-containing protein KCTD2	NM_183285	11	115281464	115292586	1740	-		366	10.72	6.16		331	11.44	6.57		192	8.9	5.11		495	22.36	12.85
1408	Zfp354a	zinc finger protein 354A	NM_009329	11	50872759	50886301	4029	-		20	0.58	0.14		7	0.24	0.05		1	0.04	0		52	2.34	0.58
1409	Trpv1	transient receptor potential cation channel	NM_001001445	11	73051761	73074009	2520	-		0	0	0		0	0	0		0	0	0		3	0.13	0.05
1410	Arhgap23	rho GTPase-activating protein 23	NM_021493	11	97311474	97363714	5450	-		7	0.2	0.03		14	0.48	0.08		1225	56.79	10.42		845	38.17	7
1411	Ebf1	transcription factor COE1	NM_007897	11	44431636	44818674	2248	-		13	0.38	0.16		6	0.2	0.08		43	1.99	0.88		62	2.8	1.24
1412	Gps2	G protein pathway suppressor 2	NM_019726	11	69727694	69730093	1220	-		989	28.96	23.73		694	23.98	19.65		950	44.04	36.09		642	29	23.77
1413	Ap2b1	AP-2 complex subunit beta isoform a	NM_001035854, NM_027915	11	83116199	83218535	5411	-		5545	162.41	30.01		5735	198.22	36.63		5662	262.52	48.51		5279	238.51	44.07
1414	Krtap9-1	keratin associated protein 9-1	NM_015741	11	99734754	99735314	561	-		0	0	0		0	0	0		0	0	0		0	0	0
1415	Fam117a	RIKEN cDNA 5730593F17	NM_172543	11	95198332	95243182	2315	-		1852	54.24	23.42		2940	101.61	43.89		133	6.16	2.66		1087	49.11	21.21
1416	Lrrc48	leucine-rich repeat-containing protein 48	NM_029044	11	60166882	60207835	1858	-		375	10.98	5.9		315	10.88	5.85		143	6.63	3.56		105	4.74	2.55
1417	Ifi35	interferon-induced 35 kDa protein homolog	NM_027320	11	101309726	101320015	1360	-		2	0.05	0.03		5	0.17	0.12		356	16.5	12.13		250	11.29	8.3
1418	Olfr179	olfactory receptor 179	NM_207693	11	58479063	58480046	984	-		0	0	0		4	0.13	0.13		0	0	0		0	0	0
1419	Kcnab3	voltage-gated potassium channel subunit beta-3	NM_010599	11	69139760	69146543	2537	-		1	0.02	0		3	0.1	0.03		69	3.19	1.25		109	4.92	1.93
1420	Elac2	zinc phosphodiesterase ELAC protein 2	NM_023479	11	64792599	64815571	2712	-		4887	143.14	52.78		4481	154.87	57.1		619	28.7	10.58		1951	88.15	32.5
1421	Tubg1	tubulin gamma-1 chain	NM_134024	11	100981445	100987733	1609	-		998	29.23	18.16		798	27.58	17.14		245	11.35	7.05		1559	70.43	43.77
1422	Ttll6	tubulin polyglutamylase TTLL6	NM_172799	11	95995533	96026765	3493	-		8	0.23	0.06		7	0.24	0.06		291	13.49	3.86		115	5.19	1.48
1423	Tmub2	transmembrane and ubiquitin-like	NM_028076	11	102146275	102150738	2096	-		29	0.84	0.4		73	2.52	1.2		596	27.63	13.18		456	20.6	9.82
1424	Wscd1	WSC domain-containing protein 1	NM_177618	11	71564205	71603148	2761	-		2	0.05	0.01		1	0.03	0.01		11	0.51	0.18		136	6.14	2.22
1425	Kcnj2	inward rectifier potassium channel 2	NM_008425	11	110927478	110936965	4273	-		0	0	0		0	0	0		120	5.56	1.3		14	0.63	0.14
1426	Drg2	developmentally-regulated GTP-binding protein 2	NM_021354	11	60268119	60282207	1713	-		775	22.69	13.24		546	18.87	11.01		418	19.38	11.31		1609	72.69	42.43
1427	Olfr313	olfactory receptor 313	NM_146536	11	58630512	58631438	927	-		0	0	0		0	0	0		0	0	0		0	0	0
1428	Zmynd15	zinc finger MYND domain-containing protein 15	NM_001029929	11	70273124	70279701	2801	-		2	0.05	0.01		5	0.17	0.06		2079	96.39	34.41		55	2.48	0.88
1429	Tubd1	tubulin delta chain isoform 2	NM_001199046, NM_001199045, NM_001199047, NM_019756	11	86358510	86380862	1877	-		1221	35.76	19.05		1133	39.16	20.86		124	5.74	3.05		136	6.14	3.27
1430	Asgr1	asialoglycoprotein receptor 1	NM_009714	11	69867871	69871396	1245	-		5	0.14	0.11		3	0.1	0.08		0	0	0		0	0	0
1431	Mlx	max-like protein X isoform alpha	NM_001159385, NM_001159384, NM_011550	11	100948624	100953521	1984	-		1402	41.06	20.69		1329	45.93	23.15		423	19.61	9.88		812	36.68	18.48
1432	Zfp830	zinc finger protein 830	NM_025884	11	82577847	82581124	3278	-		2213	64.81	19.77		1543	53.33	16.26		173	8.02	2.44		635	28.69	8.75
1433	Olfr384	olfactory receptor 384	NM_207224	11	73416084	73417022	939	-		0	0	0		0	0	0		0	0	0		0	0	0
1434	Thoc5	THO complex subunit 5 homolog	NM_172438	11	4795346	4828868	2235	-		1675	49.06	21.95		1262	43.61	19.51		585	27.12	12.13		2117	95.65	42.79
1435	Hexim1	protein HEXIM1	NM_138753	11	102977639	102981038	3401	-		1	0.02	0		12	0.41	0.12		590	27.35	8.04		3008	135.9	39.95
1436	Dhrs7b	dehydrogenase/reductase SDR family member 7B	NM_145428, NM_001172112	11	60644189	60671648	1250	-		100	2.92	2.33		51	1.76	1.4		395	18.31	14.64		773	34.92	27.93
1437	Gsdma2	gasdermin-A2	NM_029727	11	98508073	98519271	1666	-		0	0	0		0	0	0		0	0	0		0	0	0
1438	Atp10b	probable phospholipid-transporting ATPase VB	NM_176999	11	42963379	43075787	6926	-		3439	100.72	14.54		3005	103.86	14.99		166	7.69	1.11		0	0	0
1439	Myh13	myosin-13	NM_001081250	11	67140605	67185004	5817	-		0	0	0		0	0	0		77	3.57	0.61		129	5.82	1
1440	Gm3258	transcription elongation factor SPT4 2	NM_011509	11	87551102	87556815	354	-		97	2.84	8.02		72	2.48	7		97	4.49	12.68		175	7.9	22.31
1441	Rai1	retinoic acid-induced protein 1	NM_001037764, NM_009021	11	59918515	60012697	7348	-		615	18.01	2.45		388	13.41	1.82		862	39.96	5.43		467	21.1	2.87
1442	Tbx4	T-box transcription factor TBX4 isoform b	NM_172798, NM_011536	11	85703565	85729599	3011	-		6974	204.27	67.84		6021	208.1	69.11		0	0	0		7	0.31	0.1
1443	Slc26a11	sodium-independent sulfate anion transporter	NM_178743	11	119216871	119242390	2692	-		2	0.05	0.01		0	0	0		227	10.52	3.9		64	2.89	1.07
1444	Rtn4rl1	reticulon-4 receptor-like 1 precursor	NM_177708	11	75007495	75081264	3308	-		36	1.05	0.31		31	1.07	0.32		56	2.59	0.78		100	4.51	1.36
1445	Hs3st3a1	heparan sulfate (glucosamine)	NM_178870	11	64248834	64336337	3933	-		174	5.09	1.29		197	6.8	1.72		4	0.18	0.04		1	0.04	0.01
1446	Tm4sf5	transmembrane 4 superfamily member 5	NM_029360	11	70318779	70324674	966	-		1	0.02	0.02		1	0.03	0.03		1	0.04	0.04		49	2.21	2.28
1447	Olfr1382	olfactory receptor 1382	NM_001011790	11	49348689	49349624	936	-		0	0	0		0	0	0		0	0	0		0	0	0
1448	Ict1	peptidyl-tRNA hydrolase ICT1, mitochondrial	NM_026729	11	115265080	115272227	734	-		1153	33.77	46		888	30.69	41.81		419	19.42	26.45		965	43.6	59.4
1449	Rhot1	mitochondrial Rho GTPase 1 isoform 3	NM_001163355, NM_021536, NM_001163354	11	80022616	80081409	4077	-		13928	407.95	100.06		10779	372.55	91.37		683	31.66	7.76		1915	86.52	21.22
1450	Inpp5k	inositol polyphosphate 5-phosphatase K	NM_008916	11	75444522	75462367	2660	-		1162	34.03	12.79		836	28.89	10.86		1059	49.1	18.45		340	15.36	5.77
1451	Rnd2	rho-related GTP-binding protein RhoN precursor	NM_009708	11	101329652	101332620	684	-		6	0.17	0.24		8	0.27	0.39		76	3.52	5.14		426	19.24	28.12
1452	Tlcd2	TLC domain-containing protein 2	NM_027249	11	75281581	75284146	1153	-		8	0.23	0.19		8	0.27	0.23		25	1.15	0.99		57	2.57	2.22
1453	Sebox	homeobox protein SEBOX	NM_008759	11	78317015	78318584	1347	-		3938	115.34	85.62		2501	86.44	64.17		0	0	0		0	0	0
1454	Nt5m	5'(3')-deoxyribonucleotidase, mitochondrial	NM_134029	11	59661575	59690035	1306	-		420	12.3	9.41		320	11.06	8.46		378	17.52	13.41		56	2.53	1.93
1455	Bzrap1	peripheral-type benzodiazepine	NM_172449	11	87574043	87599430	7633	-		4	0.11	0.01		4	0.13	0.01		50	2.31	0.3		33	1.49	0.19
1456	Atad5	ATPase family AAA domain-containing protein 5	NM_001029856	11	79902914	79949293	7263	-		2086	61.09	8.41		1649	56.99	7.84		52	2.41	0.33		1915	86.52	11.91
1457	Cnp	2',3'-cyclic-nucleotide 3'-phosphodiesterase	NM_001146318, NM_009923	11	100436289	100443039	2283	-		40	1.17	0.51		26	0.89	0.38		467	21.65	9.48		559	25.25	11.06
1458	Bahcc1	BAH and coiled-coil domain-containing protein 1	NM_198423	11	120094261	120153611	10756	-		101	2.95	0.27		139	4.8	0.44		89	4.12	0.38		1256	56.74	5.27
1459	Slc25a10	mitochondrial dicarboxylate carrier	NM_013770	11	120353186	120360480	2021	-		56	1.64	0.81		66	2.28	1.12		1920	89.02	44.04		199	8.99	4.44
1460	Med7	mediator of RNA polymerase II transcription	NM_001104556, NM_025426, NM_001104557, NM_001104530	11	46250449	46256223	2560	-		2847	83.38	32.57		2723	94.11	36.76		138	6.39	2.49		776	35.06	13.69
1461	Med9	mediator of RNA polymerase II transcription	NM_138675	11	59761716	59776808	3013	-		567	16.6	5.5		582	20.11	6.67		776	35.97	11.93		736	33.25	11.03
1462	Aurkb	serine/threonine-protein kinase 12	NM_011496	11	68859145	68865164	1957	-		703	20.59	10.52		752	25.99	13.28		52	2.41	1.23		2273	102.7	52.47
1463	Ppp2ca	serine/threonine-protein phosphatase 2A	NM_019411	11	51912326	51936251	1930	-		5483	160.59	83.2		4115	142.22	73.68		2333	108.17	56.04		6902	311.85	161.58
1464	Trim7	tripartite motif-containing protein 7	NM_053166	11	48639640	48663697	1366	-		40	1.17	0.85		23	0.79	0.57		116	5.37	3.93		207	9.35	6.84
1465	Mfsd6l	major facilitator superfamily domain-containing	NM_146004	11	68369688	68371747	2085	-		10	0.29	0.13		9	0.31	0.14		73	3.38	1.62		0	0	0
1466	Tmem98	transmembrane protein 98	NM_029537	11	80623917	80635535	1444	-		3	0.08	0.05		4	0.13	0.09		201	9.31	6.44		227	10.25	7.09
1467	Havcr2	hepatitis A virus cellular receptor 2 homolog	NM_134250	11	46268433	46294756	2725	-		0	0	0		0	0	0		630	29.21	10.71		7	0.31	0.11
1468	Hoxb1	homeobox protein Hox-B1	NM_008266	11	96227072	96228990	1499	-		1	0.02	0.01		0	0	0		0	0	0		0	0	0
1469	Mfsd11	UNC93-like protein MFSD11	NM_178620	11	116715329	116736951	3172	-		129	3.77	1.18		132	4.56	1.43		1668	77.33	24.37		306	13.82	4.35
1470	Lasp1	LIM and SH3 domain protein 1	NM_010688	11	97660986	97700078	3433	-		118	3.45	1		72	2.48	0.72		4513	209.24	60.94		7380	333.44	97.12
1471	Trappc1	trafficking protein particle complex subunit 1	NM_001024206	11	69137488	69139295	745	-		969	28.38	38.09		682	23.57	31.63		735	34.07	45.73		545	24.62	33.04
1472	Vwc2	brorin precursor	NM_177033	11	11014019	11163529	3578	-		433	12.68	3.54		464	16.03	4.48		6	0.27	0.07		3	0.13	0.03
1473	Cnot8	CCR4-NOT transcription complex subunit 8	NM_026949	11	57917655	57932096	2035	-		5425	158.89	78.07		3542	122.42	60.15		444	20.58	10.11		2084	94.16	46.27
1474	Ppm1d	protein phosphatase 1D	NM_016910	11	85124756	85160568	2908	-		1498	43.87	15.08		1458	50.39	17.32		859	39.82	13.69		1091	49.29	16.94
1475	Sox30	transcription factor SOX-30	NM_173384	11	45793812	45831495	3074	-		8	0.23	0.07		9	0.31	0.1		290	13.44	4.37		13	0.58	0.18
1476	Gngt2	guanine nucleotide binding protein, gamma	NM_023121, NM_001038664	11	95703609	95707045	586	-		0	0	0		0	0	0		953	44.18	75.39		67	3.02	5.15
1477	Acaca	acetyl-CoA carboxylase 1	NM_133360	11	84008940	84215153	9054	-		235	6.88	0.75		251	8.67	0.95		594	27.54	3.04		1097	49.56	5.47
1478	Irgm2	interferon inducible GTPase 2	NM_019440	11	58013139	58036277	3482	-		60	1.75	0.5		42	1.45	0.41		441	20.44	5.87		718	32.44	9.31
1479	Fnip1	folliculin-interacting protein 1	NM_173753	11	54251691	54331738	6290	-		2363	69.21	11		2454	84.81	13.48		1170	54.24	8.62		961	43.42	6.9
1480	Zfp692-ps	zinc finger protein 692	NM_182996, NM_001040686	11	58120571	58128115	1949	-		754	22.08	11.32		528	18.24	9.35		77	3.57	1.83		541	24.44	12.53
1481	Olfr54	olfactory receptor 54	NM_010997	11	50840506	50841447	942	-		0	0	0		0	0	0		0	0	0		0	0	0
1482	Olfr1390	olfactory receptor 1390	NM_147065	11	49154036	49154971	936	-		0	0	0		0	0	0		0	0	0		0	0	0
1483	Zfp207	zinc finger protein 207 isoform 2	NM_011751, NM_001130171, NM_001130170, NM_001130169	11	80196848	80209639	2081	-		4752	139.18	66.88		4326	149.52	71.85		1163	53.92	25.91		6279	283.7	136.32
1484	Tex19.1	testis-expressed protein 19.1	NM_028602	11	121007457	121009627	1754	-		3568	104.5	59.57		2599	89.82	51.2		5	0.23	0.13		3159	142.73	81.37
1485	Amz2	archaemetzincin-2	NM_025275	11	109287260	109299462	2816	-		1931	56.55	20.08		1708	59.03	20.96		6031	279.62	99.29		801	36.19	12.85
1486	Adcy1	adenylate cyclase type 1	NM_009622	11	6963492	7078508	12259	-		759	22.23	1.81		1331	46	3.75		28	1.29	0.1		315	14.23	1.16
1487	Olfr324	olfactory receptor 324	NM_001011743	11	58410894	58411895	1002	-		0	0	0		0	0	0		0	0	0		0	0	0
1488	Ankfy1	ankyrin repeat and FYVE domain-containing	NM_009671	11	72503504	72585648	8034	-		2054	60.16	7.48		2269	78.42	9.76		1626	75.38	9.38		2810	126.96	15.8
1489	Lig3	DNA ligase 3	NM_010716	11	82594637	82617776	5945	-		4674	136.9	23.02		3791	131.02	22.03		1832	84.94	14.28		1716	77.53	13.04
1490	Pmp22	peripheral myelin protein 22	NM_008885	11	62945012	62973048	1801	-		14	0.41	0.22		4	0.13	0.07		1796	83.27	46.23		20	0.9	0.49
1491	Synrg	synergin gamma isoform 1	NM_001115009, NM_194341	11	83777930	83855581	4589	-		3216	94.19	20.52		3600	124.42	27.11		1017	47.15	10.27		527	23.81	5.18
1492	Fscn2	fascin homolog 2, actin-bundling protein,	NM_172802	11	120222848	120229483	1716	-		9	0.26	0.15		8	0.27	0.15		17	0.78	0.45		5	0.22	0.12
1493	Kcnh6	potassium voltage-gated channel, subfamily H	NM_001037712	11	105869517	105895378	2853	-		0	0	0		2	0.06	0.02		66	3.06	1.07		43	1.94	0.67
1494	Card14	caspase recruitment domain-containing protein	NM_130886	11	119176101	119206689	3958	-		359	10.51	2.65		221	7.63	1.92		465	21.55	5.44		20	0.9	0.22
1495	Pirt	phosphoinositide-interacting protein	NM_178656	11	66725493	66742202	3014	-		0	0	0		0	0	0		0	0	0		54	2.43	0.8
1496	Olfr320	olfactory receptor 320	NM_207230	11	58497377	58498297	921	-		0	0	0		0	0	0		0	0	0		0	0	0
1497	F830116E18Rik	hemoglobin, theta T1	NM_001033981	11	32186964	32187912	748	-		0	0	0		0	0	0		0	0	0		1	0.04	0.05
1498	Dnaic2	dynein intermediate chain 2, axonemal	NM_001034878	11	114588726	114619200	2871	-		2	0.05	0.01		11	0.38	0.13		288	13.35	4.64		38	1.71	0.59
1499	Olfr314	olfactory receptor 314	NM_001011760	11	58599738	58600730	993	-		0	0	0		0	0	0		0	0	0		0	0	0
1500	Ptrh2	peptidyl-tRNA hydrolase 2, mitochondrial isoform	NM_175004, NM_001098810	11	86497485	86505959	2999	-		1297	37.98	12.66		856	29.58	9.86		242	11.22	3.74		663	29.95	9.98
1501	Spaca3	sperm acrosome membrane-associated protein 3	NM_029367	11	80671891	80681316	941	-		0	0	0		0	0	0		177	8.2	8.71		0	0	0
1502	Wnk4	serine/threonine-protein kinase WNK4	NM_175638	11	101121925	101138723	4149	-		47	1.37	0.33		46	1.58	0.38		327	15.16	3.65		26	1.17	0.28
1503	Fndc8	fibronectin type III domain-containing protein	NM_030224	11	82705647	82714239	2081	-		1	0.02	0		2	0.06	0.02		366	16.96	8.14		3	0.13	0.06
1504	Prkar1a	cAMP-dependent protein kinase type I-alpha	NM_021880	11	109512263	109530962	3323	-		3031	88.77	26.71		3240	111.98	33.69		3335	154.62	46.53		3502	158.22	47.61
1505	Myh4	myosin-4	NM_010855	11	67051531	67073948	6016	-		5	0.14	0.02		5	0.17	0.02		0	0	0		1	0.04	0
1506	Sertad2	SERTA domain-containing protein 2	NM_001038625, NM_021372	11	20443256	20553026	5730	-		354	10.36	1.8		665	22.98	4.01		894	41.45	7.23		1466	66.23	11.55
1507	Psmd11	26S proteasome non-ATPase regulatory subunit 11	NM_178616	11	80242117	80285635	1743	-		2156	63.14	36.22		1305	45.1	25.87		586	27.17	15.58		3157	142.64	81.83
1508	Upp1	uridine phosphorylase 1	NM_001159401, NM_009477, NM_001159402	11	9018106	9036167	1277	-		6226	182.36	142.8		4253	146.99	115.1		4	0.18	0.14		6339	286.41	224.28
1509	Sry	sex-determining region Y protein	NM_011564	Y	1918381	1919568	1188	+		0	0	0		0	0	0		0	0	0		0	0	0
1510	Usp9y	ubiquitin specific peptidase 9, Y chromosome	NM_148943	Y	635404	796225	8094	+		10	0.29	0.03		3	0.1	0.01		9	0.41	0.05		2	0.09	0.01
1511	Zfy2	zinc finger Y-chromosomal protein 2	NM_009571	Y	1362123	1426357	2816	+		1	0.02	0		0	0	0		3	0.13	0.04		2	0.09	0.03
1512	Zfy1	zinc finger Y-chromosomal protein 1	NM_009570	Y	61650	133852	2785	+		0	0	0		0	0	0		9	0.41	0.14		108	4.87	1.74
1513	Uty	histone demethylase UTY	NM_009484	Y	433587	582181	5228	+		0	0	0		1	0.03	0		183	8.48	1.62		419	18.93	3.62
1514	Ddx3y	DEAD (Asp-Glu-Ala-Asp) box polypeptide 3	NM_012008	Y	598010	622998	3767	+		3	0.08	0.02		1	0.03	0		376	17.43	4.62		1004	45.36	12.04
1515	Eif2s3y	eukaryotic translation initiation factor 2,	NM_012011	Y	347055	365037	1801	-		1	0.02	0.01		0	0	0		654	30.32	16.83		1522	68.76	38.17
1516	Kdm5d	lysine-specific demethylase 5D	NM_011419	Y	234231	280254	5471	-		0	0	0		0	0	0		156	7.23	1.32		398	17.98	3.28
1517	Il16	pro-interleukin-16	NM_010551	7	90791573	90884000	4989	+		3	0.08	0.01		3	0.1	0.02		251	11.63	2.33		3	0.13	0.02
1518	Hdgfrp3	hepatoma-derived growth factor-related protein	NM_013886	7	89026142	89079345	5868	+		37	1.08	0.18		72	2.48	0.42		347	16.08	2.74		216	9.75	1.66
1519	Olfr643	olfactory receptor 643	NM_147077	7	111207170	111208114	945	+		0	0	0		0	0	0		1	0.04	0.04		0	0	0
1520	Maz	myc-associated zinc finger protein	NM_010772	7	134165651	134169993	2385	+		81	2.37	0.99		108	3.73	1.56		1434	66.48	27.87		7273	328.61	137.78
1521	Vmn2r52	vomeronasal 2, receptor 52	NM_001105191	7	10744001	10761635	2559	+		0	0	0		0	0	0		0	0	0		0	0	0
1522	Ascl2	achaete-scute homolog 2	NM_008554	7	150152731	150155132	1606	+		3	0.08	0.04		1	0.03	0.01		2	0.09	0.05		90	4.06	2.52
1523	Tomt	transmembrane O-methyltransferase	NM_001081679	7	109048322	109054873	1354	+		805	23.57	17.4		760	26.26	19.39		115	5.33	3.93		454	20.51	15.14
1524	Cend1	cell cycle exit and neuronal differentiation	NM_021316	7	148612350	148615319	1659	+		0	0	0		0	0	0		8	0.37	0.22		3	0.13	0.07
1525	Olfr648	olfactory receptor 648	NM_146751	7	111327970	111328920	951	+		0	0	0		0	0	0		0	0	0		0	0	0
1526	Bet1l	BET1-like protein	NM_018742	7	148039283	148042282	1552	+		100	2.92	1.88		121	4.18	2.69		459	21.28	13.71		386	17.44	11.23
1527	Rbm42	RNA-binding protein 42	NM_133693	7	31426020	31435184	1646	+		3944	115.52	70.18		3970	137.21	83.35		832	38.57	23.43		3247	146.7	89.12
1528	Gramd1a	GRAM domain-containing protein 1A	NM_027898	7	31915146	31936069	2681	+		3	0.08	0.02		5	0.17	0.06		448	20.77	7.74		1411	63.75	23.77
1529	Olfr67	olfactory receptor 67	NM_013619	7	110935726	110940344	1242	+		0	0	0		0	0	0		0	0	0		0	0	0
1530	Psmd8	proteasome 26S subunit, non-ATPase, 8	NM_026545	7	29959206	29965692	1529	+		6577	192.64	125.99		4786	165.41	108.18		7027	325.8	213.08		4821	217.82	142.45
1531	Olfr559	olfactory receptor 559	NM_147112	7	109872046	109873002	957	+		0	0	0		0	0	0		0	0	0		0	0	0
1532	Gm5595	hypothetical protein LOC434179	NM_001008427	7	49915478	49948088	3166	+		65	1.9	0.6		37	1.27	0.4		15	0.69	0.21		98	4.42	1.39
1533	Fcgrt	IgG receptor FcRn large subunit p51 precursor	NM_010189	7	52348363	52359192	1738	+		6	0.17	0.09		8	0.27	0.15		506	23.46	13.49		223	10.07	5.79
1534	Spn	spinophilin	NM_001037810, NM_009259	7	134276978	134281331	3741	+		4	0.11	0.02		2	0.06	0.01		198	9.18	2.45		104	4.69	1.25
1535	Tmem126a	transmembrane protein 126A	NM_025460	7	97599222	97605718	766	+		329	9.63	12.57		209	7.22	9.42		302	14	18.27		649	29.32	38.27
1536	Isoc2b	isochorismatase domain-containing protein 2B,	NM_026158	7	4796562	4817781	1065	+		379	11.1	10.42		369	12.75	11.97		339	15.71	14.75		14	0.63	0.59
1537	Cttn	src substrate cortactin	NM_007803	7	151621629	151656646	3029	+		276	8.08	2.66		358	12.37	4.08		745	34.54	11.4		4533	204.81	67.61
1538	Sec11a	signal peptidase complex catalytic subunit	NM_019951	7	88060265	88092436	1113	+		2612	76.5	68.73		1591	54.99	49.4		1243	57.63	51.77		2096	94.7	85.08
1539	Atp1a3	sodium/potassium-transporting ATPase subunit	NM_144921	7	25763188	25790914	4043	+		262	7.67	1.89		358	12.37	3.05		4109	190.51	47.12		1417	64.02	15.83
1540	Gp2	pancreatic secretory granule membrane major	NM_025989	7	126586058	126602786	1978	+		5	0.14	0.07		5	0.17	0.08		0	0	0		0	0	0
1541	Psg23	pregnancy-specific glycoprotein 23	NM_020261	7	19191692	19201850	2176	+		0	0	0		0	0	0		0	0	0		0	0	0
1542	Cyp2r1	vitamin D 25-hydroxylase	NM_177382	7	121693682	121706486	1639	+		125	3.66	2.23		103	3.56	2.17		30	1.39	0.84		3	0.13	0.07
1543	Olfr566	olfactory receptor 566	NM_001011536	7	110004835	110005785	951	+		0	0	0		0	0	0		0	0	0		0	0	0
1544	Tollip	toll-interacting protein	NM_023764	7	149067490	149088311	3705	+		4458	130.57	35.24		3513	121.42	32.77		2501	115.95	31.29		2009	90.77	24.49
1545	2210010C17Rik	hypothetical protein LOC70080	NM_027308	7	20522654	20536092	1895	+		1673	49	25.85		1437	49.66	26.2		2	0.09	0.04		195	8.81	4.64
1546	Cd19	CD19 molecule	NM_009844	7	133551962	133558384	2440	+		8	0.23	0.09		1	0.03	0.01		104	4.82	1.97		0	0	0
1547	Vmn1r66	vomeronasal 1 receptor, E11	NM_134230	7	10859177	10860700	1523	+		0	0	0		0	0	0		0	0	0		0	0	0
1548	Flt3l	SL cytokine precursor	NM_013520	7	52386784	52391655	1152	+		0	0	0		0	0	0		66	3.06	2.65		12	0.54	0.46
1549	Cd3eap	DNA-directed RNA polymerase I subunit RPA34	NM_145822	7	19942215	19944768	1354	+		162	4.74	3.5		206	7.12	5.25		120	5.56	4.1		448	20.24	14.94
1550	Mrgpra4	mas-related G-protein coupled receptor member	NM_153524	7	55236164	55237666	1503	+		0	0	0		0	0	0		0	0	0		0	0	0
1551	Grin2d	glutamate [NMDA] receptor subunit epsilon-4	NM_008172	7	53087853	53122051	4383	+		19	0.55	0.12		20	0.69	0.15		1399	64.86	14.79		28	1.26	0.28
1552	Tmem86b	transmembrane protein 86B	NM_023440	7	4579642	4582084	1251	+		6	0.17	0.13		11	0.38	0.3		52	2.41	1.92		62	2.8	2.23
1553	Hbb-bh1	hemoglobin subunit beta-H1	NM_008219	7	110990152	110991676	610	+		0	0	0		0	0	0		0	0	0		0	0	0
1554	Tmc4	transmembrane channel-like protein 4	NM_181820	7	3617356	3629155	2346	+		1035	30.31	12.91		790	27.3	11.63		598	27.72	11.81		57	2.57	1.09
1555	Uevld	ubiquitin-conjugating enzyme E2 variant 3	NM_001040695	7	54178586	54213888	4607	+		94	2.75	0.59		111	3.83	0.83		116	5.37	1.16		254	11.47	2.48
1556	Neu3	Neu3, isoform D	NM_016720	7	106959949	106976927	3341	+		101	2.95	0.88		129	4.45	1.33		85	3.94	1.17		68	3.07	0.91
1557	Rps11	40S ribosomal protein S11	NM_013725	7	52377756	52379749	611	+		2907	85.14	139.34		1739	60.1	98.36		5048	234.05	383.06		16993	767.79	1256.61
1558	Olfr544	olfactory receptor 544	NM_020289	7	109632628	109633632	1005	+		0	0	0		0	0	0		0	0	0		1	0.04	0.03
1559	2900092E17Rik	PAXIP1-associated protein 1	NM_030240	7	134158565	134160866	1448	+		474	13.88	9.58		389	13.44	9.28		203	9.41	6.49		1021	46.13	31.85
1560	Olfr695	olfactory receptor 695	NM_146598	7	113857246	113858193	948	+		0	0	0		0	0	0		0	0	0		0	0	0
1561	Dhx34	probable ATP-dependent RNA helicase DHX34	NM_027883	7	16782570	16807381	3801	+		764	22.37	5.88		856	29.58	7.78		415	19.24	5.06		672	30.36	7.98
1562	1700007K09Rik	hypothetical protein LOC69318 precursor	NM_027037	7	138469445	138473013	676	+		0	0	0		0	0	0		176	8.16	12.07		0	0	0
1563	Gm16387	hypothetical protein LOC100038914	NM_001024727	7	46511994	46519904	2968	+		4	0.11	0.03		1	0.03	0.01		30	1.39	0.46		0	0	0
1564	Spnb4	spectrin beta 4 isoform sigma6	NM_032610	7	28141402	28231608	8737	+		2	0.05	0		4	0.13	0.01		116	5.37	0.61		783	35.37	4.04
1565	Vmn1r58	vomeronasal 1 receptor 58	NM_030739	7	5360492	5364747	2683	+		0	0	0		0	0	0		0	0	0		0	0	0
1566	Ruvbl2	ruvB-like 2	NM_011304	7	52677268	52689834	1675	+		5253	153.86	91.85		4364	150.83	90.04		662	30.69	18.32		11846	535.23	319.54
1567	Olfr640	olfactory receptor 640	NM_146822	7	111169886	111170830	945	+		0	0	0		0	0	0		0	0	0		0	0	0
1568	AW146154	hypothetical protein LOC101835	NM_001033530	7	48734244	48755260	3411	+		1087	31.83	9.33		659	22.77	6.67		49	2.27	0.66		92	4.15	1.21
1569	Vmn2r50	vomeronasal receptor Vmn2r50	NM_001105178	7	10622584	10638527	2586	+		0	0	0		0	0	0		0	0	0		0	0	0
1570	Fancf	Fanconi anemia, complementation group F	NM_001115087	7	59115949	59117637	1691	+		12	0.35	0.2		13	0.44	0.26		43	1.99	1.17		121	5.46	3.22
1571	Snurf	SNRPN upstream reading frame protein	NM_033174	7	67127388	67150042	1970	+		452	13.23	6.71		515	17.8	9.03		212	9.82	4.98		2004	90.54	45.95
1572	Dnajb13	dnaJ homolog subfamily B member 13	NM_153527	7	107651529	107663324	1172	+		5	0.14	0.11		3	0.1	0.08		494	22.9	19.53		121	5.46	4.65
1573	Lrrc28	leucine rich repeat containing 28	NM_175124	7	74658297	74790117	2922	+		5295	155.09	53.07		5483	189.51	64.85		3383	156.85	53.67		292	13.19	4.51
1574	Nccrp1	non-specific cytotoxic cell receptor protein 1	NM_001081115	7	29328616	29332273	1531	+		0	0	0		1	0.03	0.01		11	0.51	0.33		12	0.54	0.35
1575	Aplp1	amyloid-like protein 1	NM_007467	7	31220001	31230580	2389	+		1	0.02	0		5	0.17	0.07		57	2.64	1.1		1714	77.44	32.41
1576	Snrpn	small nuclear ribonucleoprotein-associated	NM_001082962, NM_001082961, NM_013670	7	67127388	67285105	2076	+		680	19.91	9.59		687	23.74	11.43		222	10.29	4.95		2018	91.17	43.91
1577	Ppp1r15a	protein phosphatase 1 regulatory subunit 15A	NM_008654	7	52778290	52781583	2275	+		2296	67.25	29.56		1838	63.52	27.92		374	17.34	7.62		1346	60.81	26.72
1578	Olfr649	olfactory receptor 649	NM_147055	7	111337781	111338719	939	+		0	0	0		0	0	0		0	0	0		0	0	0
1579	Calca	calcitonin gene-related peptide 1 isoform Cgrp	NM_007587, NM_001033954	7	121774992	121779871	1022	+		1	0.02	0.01		1	0.03	0.02		10	0.46	0.45		716	32.35	31.65
1580	Cdkn1c	cyclin-dependent kinase inhibitor 1C isoform 1	NM_009876, NM_001161624	7	150644245	150646901	1849	+		327	9.57	5.17		408	14.1	7.62		1788	82.9	44.83		102	4.6	2.48
1581	Krtap5-1	keratin-associated protein 5-1	NM_015808	7	149482282	149482974	693	+		0	0	0		0	0	0		0	0	0		0	0	0
1582	Dpy19l3	protein dpy-19 homolog 3	NM_178704	7	36473853	36539417	4314	+		759	22.23	5.15		995	34.39	7.97		131	6.07	1.4		257	11.61	2.69
1583	Olfr519	olfactory receptor 519	NM_207160	7	116036975	116037919	945	+		0	0	0		0	0	0		0	0	0		0	0	0
1584	Chmp2a	charged multivesicular body protein 2a	NM_026885	7	13617368	13620093	880	+		1049	30.72	34.9		749	25.88	29.4		1729	80.16	91.09		1362	61.53	69.92
1585	Relb	transcription factor RelB	NM_009046	7	20191571	20214787	2218	+		246	7.2	3.24		270	9.33	4.2		231	10.71	4.82		650	29.36	13.23
1586	Olfr531	olfactory receptor 531	NM_146953	7	147586029	147586943	915	+		1	0.02	0.02		0	0	0		0	0	0		0	0	0
1587	Inppl1	phosphatidylinositol-3,4,5-trisphosphate	NM_001122739, NM_010567	7	108971146	108986740	5012	+		1033	30.25	6.03		1501	51.87	10.34		1408	65.28	13.02		3365	152.03	30.33
1588	Pira4	paired-Ig-like receptor A4	NM_011091	7	3789729	3849694	2165	+		0	0	0		1	0.03	0.01		192	8.9	4.11		1	0.04	0.01
1589	Mfge8	lactadherin isoform 2	NM_001045489, NM_008594	7	86278654	86293946	2143	+		13	0.38	0.17		12	0.41	0.19		72122	3343.95	1560.4		6431	290.57	135.59
1590	Kif22	kinesin-like protein KIF22	NM_145588	7	134171245	134185934	2086	+		13055	382.38	183.3		9400	324.89	155.74		60	2.78	1.33		3141	141.91	68.02
1591	9130023H24Rik	hypothetical protein LOC319792	NM_177001	7	135377965	135381545	3581	+		830	24.31	6.78		717	24.78	6.91		272	12.61	3.52		80	3.61	1
1592	Pex11a	peroxisomal membrane protein 11A	NM_011068	7	86882150	86887911	879	+		594	17.39	19.78		447	15.44	17.56		242	11.22	12.76		81	3.65	4.15
1593	Dub1a	deubiquitinating enzyme 1a	NM_201409	7	111988826	111991018	1407	+		2	0.05	0.03		1	0.03	0.02		3	0.13	0.09		28	1.26	0.89
1594	Krtap5-2	keratin-associated protein 5-2	NM_027844	7	149360440	149361910	937	+		0	0	0		0	0	0		0	0	0		0	0	0
1595	Vasp	vasodilator-stimulated phosphoprotein	NM_009499	7	19842279	19857203	2270	+		349	10.22	4.5		256	8.84	3.89		3751	173.91	76.61		5162	233.23	102.74
1596	Gabra5	gamma-aminobutyric acid receptor subunit alpha-5	NM_176942	7	64663039	64765379	2674	+		230	6.73	2.51		117	4.04	1.51		4	0.18	0.06		3	0.13	0.04
1597	Siglece	sialic acid-binding Ig-like lectin 12	NM_031181	7	50906440	50915531	1849	+		331	9.69	5.24		164	5.66	3.06		33	1.53	0.82		0	0	0
1598	Mia1	melanoma-derived growth regulatory protein	NM_019394	7	27964760	27966168	583	+		0	0	0		0	0	0		80	3.7	6.34		99	4.47	7.66
1599	Olfr694	olfactory receptor 694	NM_146452	7	113832296	113833243	948	+		0	0	0		0	0	0		0	0	0		0	0	0
1600	Usf2	upstream stimulatory factor 2	NM_011680	7	31731015	31741798	1687	+		2166	63.44	37.6		1842	63.66	37.73		965	44.74	26.52		1091	49.29	29.21
1601	Obox6	oocyte specific homeobox 6	NM_145710	7	16418599	16425028	1336	+		11	0.32	0.23		5	0.17	0.12		0	0	0		123	5.55	4.15
1602	Phlda2	pleckstrin homology-like domain, family A,	NM_009434	7	150687453	150688429	737	+		125	3.66	4.96		83	2.86	3.88		0	0	0		1119	50.55	68.58
1603	Trim66	tripartite motif-containing protein 66	NM_181853, NM_001170912, NM_001170913	7	116592517	116637252	9228	+		36	1.05	0.11		44	1.52	0.16		43	1.99	0.21		28	1.26	0.13
1604	Zfp787	zinc finger protein 787	NM_001013012	7	6083091	6107573	1899	+		226	6.61	3.48		262	9.05	4.76		433	20.07	10.56		397	17.93	9.44
1605	Med25	mediator complex subunit 25	NM_029365	7	52134756	52147736	2291	+		2854	83.59	36.48		3239	111.95	48.86		1485	68.85	30.05		4155	187.73	81.94
1606	Ccdc83	coiled-coil domain-containing protein 83 isoform	NM_029256, NM_183293	7	97384271	97413942	1546	+		0	0	0		0	0	0		82	3.8	2.45		0	0	0
1607	Cd22	B-cell receptor CD22	NM_009845, NM_001043317	7	31650846	31665361	3912	+		8	0.23	0.05		17	0.58	0.14		663	30.74	7.85		38	1.71	0.43
1608	Asphd1	aspartate beta-hydroxylase domain-containing	NM_001039645	7	134089522	134093095	518	+		0	0	0		5	0.17	0.32		4	0.18	0.34		20	0.9	1.73
1609	Sct	secretin precursor	NM_011328	7	148464237	148465030	507	+		7	0.2	0.39		6	0.2	0.39		1	0.04	0.07		16	0.72	1.42
1610	Lipe	hormone-sensitive lipase isoform 2	NM_010719, NM_001039507	7	26164546	26181006	3221	+		639	18.71	5.8		602	20.8	6.45		4740	219.77	68.23		171	7.72	2.39
1611	Abpd	androgen-binding protein delta precursor	NM_001009952	7	34149362	34151338	520	+		0	0	0		0	0	0		0	0	0		0	0	0
1612	Hamp2	hepcidin-2	NM_183257	7	31707416	31709200	414	+		9	0.26	0.62		5	0.17	0.41		0	0	0		0	0	0
1613	Mrgprb4	mas-related G-protein coupled receptor member	NM_205795	7	55453583	55454548	966	+		0	0	0		0	0	0		0	0	0		0	0	0
1614	Zfp94	zinc finger protein 94 isoform 1	NM_009568	7	25086815	25101623	2472	+		341	9.98	4.03		420	14.51	5.86		44	2.04	0.82		64	2.89	1.16
1615	Zfp768	zinc finger protein 768	NM_146202	7	134486309	134488828	2268	+		21	0.61	0.26		109	3.76	1.65		336	15.57	6.86		62	2.8	1.23
1616	Olfr639	olfactory receptor 639	NM_147084	7	111160264	111161214	951	+		0	0	0		0	0	0		0	0	0		0	0	0
1617	Mphosph10	U3 small nucleolar ribonucleoprotein protein	NM_026483	7	71521427	71537122	2202	+		6061	177.52	80.61		3437	118.79	53.94		262	12.14	5.51		1950	88.1	40
1618	Myo7a	myosin-VIIa	NM_008663	7	105199570	105268003	7361	+		803	23.52	3.19		586	20.25	2.75		2481	115.03	15.62		698	31.53	4.28
1619	Olfr624	olfactory receptor 624	NM_001011865	7	110818617	110819543	927	+		0	0	0		0	0	0		0	0	0		0	0	0
1620	Olfr294	olfactory receptor 294	NM_001011750	7	93764146	93765153	1008	+		0	0	0		0	0	0		0	0	0		0	0	0
1621	3110040N11Rik	hypothetical protein LOC67290	NM_026077	7	88927073	88934339	857	+		388	11.36	13.25		221	7.63	8.9		218	10.1	11.78		272	12.28	14.32
1622	Vmn1r76	vomeronasal 1 receptor, G4	NM_134205	7	12515660	12516634	975	+		1	0.02	0.02		3	0.1	0.1		0	0	0		0	0	0
1623	4931406P16Rik	hypothetical protein LOC233103	NM_172741	7	35021733	35070628	5808	+		9502	278.31	47.91		8035	277.71	47.81		559	25.91	4.46		1992	90	15.49
1624	Vmn1r69	vomeronasal 1 receptor, E9	NM_145842	7	11165105	11166836	1731	+		1	0.02	0.01		5	0.17	0.09		0	0	0		0	0	0
1625	Olfr482	olfactory receptor 482	NM_146733	7	115238111	115239082	972	+		0	0	0		0	0	0		0	0	0		0	0	0
1626	Tpp1	tripeptidyl-peptidase 1 precursor	NM_009906	7	112893361	112900721	3494	+		153	4.48	1.28		114	3.94	1.12		4394	203.72	58.3		1106	49.97	14.3
1627	Psg27	pregnancy-specific glycoprotein 27	NM_001037168	7	19141863	19152654	1989	+		2	0.05	0.02		1	0.03	0.01		0	0	0		0	0	0
1628	Trim30a	tripartite motif-containing protein 30	NM_009099	7	111557540	111613707	3771	+		316	9.25	2.45		224	7.74	2.05		636	29.48	7.81		176	7.95	2.1
1629	Gsg1l	GSG1-like	NM_001101488	7	133021933	133225925	3924	+		14	0.41	0.1		22	0.76	0.19		9	0.41	0.1		7	0.31	0.07
1630	Cars	cysteinyl-tRNA synthetase, cytoplasmic	NM_013742	7	150743610	150785947	2749	+		2051	60.07	21.85		1850	63.94	23.25		407	18.87	6.86		6894	311.48	113.3
1631	Bcl2l12	BCL2-like 12 (proline rich)	NM_029410	7	52246595	52252949	1073	+		244	7.14	6.65		165	5.7	5.31		115	5.33	4.96		669	30.22	28.16
1632	Olfr516	olfactory receptor 516	NM_146725	7	115988578	115989522	945	+		0	0	0		0	0	0		0	0	0		0	0	0
1633	Vmn2r63	vomeronasal 2, receptor 63	NM_001105060	7	50158621	50189159	2580	+		0	0	0		0	0	0		2	0.09	0.03		1	0.04	0.01
1634	Rnf141	RING finger protein 141	NM_025999	7	117960049	117987895	952	+		1251	36.64	38.48		1291	44.62	46.86		142	6.58	6.91		164	7.4	7.77
1635	Kcnj11	ATP-sensitive inward rectifier potassium channel	NM_010602	7	53352532	53355607	3103	+		0	0	0		0	0	0		0	0	0		7	0.31	0.09
1636	Il28a	interleukin-28A precursor	NM_001024673	7	29293880	29295379	582	+		0	0	0		0	0	0		0	0	0		0	0	0
1637	Pak4	serine/threonine-protein kinase PAK 4	NM_027470	7	29343838	29383203	2898	+		5025	147.18	50.78		5367	185.5	64		516	23.92	8.25		3824	172.77	59.61
1638	Zfp575	zinc finger protein 575	NM_001033205	7	25368857	25372660	2741	+		96	2.81	1.02		149	5.14	1.87		1	0.04	0.01		18	0.81	0.29
1639	Plekhf1	pleckstrin homology domain-containing family F	NM_024413	7	39005673	39013013	1559	+		11	0.32	0.2		2	0.06	0.03		113	5.23	3.35		287	12.96	8.31
1640	Syt5	synaptotagmin-5	NM_016908	7	4491367	4498169	1764	+		299	8.75	4.96		366	12.65	7.17		67	3.1	1.75		33	1.49	0.84
1641	Bax	apoptosis regulator BAX	NM_007527	7	52717065	52722268	869	+		248	7.26	8.35		205	7.08	8.14		1034	47.94	55.16		5643	254.96	293.39
1642	Mrgprb2	mas-related G-protein coupled receptor member	NM_175531	7	55806338	55813456	2074	+		0	0	0		0	0	0		4	0.18	0.08		0	0	0
1643	Rab4b	ras-related protein Rab-4B	NM_029391	7	27953452	27963902	1170	+		474	13.88	11.86		520	17.97	15.35		902	41.82	35.74		987	44.59	38.11
1644	Lrdd	leucine-rich repeats and death domain	NM_022654	7	148624414	148629254	2900	+		27	0.79	0.27		56	1.93	0.66		23	1.06	0.36		798	36.05	12.43
1645	Olfr66	olfactory receptor 66	NM_013618	7	111029820	111030755	936	+		0	0	0		0	0	0		0	0	0		0	0	0
1646	Zfp36	tristetraprolin	NM_011756	7	29161803	29164247	1765	+		151	4.42	2.5		44	1.52	0.86		1061	49.19	27.86		670	30.27	17.15
1647	Tph1	tryptophan 5-hydroxylase 1 isoform 2	NM_009414, NM_001136084	7	53902546	53927907	2047	+		2	0.05	0.02		0	0	0		25	1.15	0.56		0	0	0
1648	Olfr702	olfactory receptor 702	NM_146597	7	113967082	113968038	957	+		4	0.11	0.11		4	0.13	0.13		2	0.09	0.09		0	0	0
1649	Sipa1l3	signal-induced proliferation-associated 1-like	NM_001081028	7	30105397	30290479	7713	+		3086	90.38	11.71		3736	129.12	16.74		1556	72.14	9.35		2094	94.61	12.26
1650	Cebpg	CCAAT/enhancer-binding protein gamma	NM_009884	7	35831441	35841585	4718	+		2725	79.81	16.91		2140	73.96	15.67		839	38.9	8.24		1026	46.35	9.82
1651	Ehd2	EH domain-containing protein 2	NM_153068	7	16534336	16552884	3058	+		3	0.08	0.02		4	0.13	0.04		207	9.59	3.13		75	3.38	1.1
1652	2310033E01Rik	hypothetical protein LOC641361 precursor	NM_001037143	7	25326677	25331024	730	+		1487	43.55	59.65		1608	55.57	76.12		2	0.09	0.12		0	0	0
1653	Wtip	Wilms tumor protein 1-interacting protein	NM_207212	7	34894567	34918287	1958	+		161	4.71	2.4		187	6.46	3.29		133	6.16	3.14		1514	68.4	34.93
1654	Ppp4c	serine/threonine-protein phosphatase 4 catalytic	NM_019674	7	133929382	133935985	1332	+		2382	69.76	52.37		1952	67.46	50.64		1178	54.61	40.99		4956	223.92	168.1
1655	Sergef	secretion-regulating guanine nucleotide exchange	NM_013789	7	53698543	53895160	1430	+		169	4.95	3.46		197	6.8	4.75		131	6.07	4.24		233	10.52	7.35
1656	Olfr518	olfactory receptor 518	NM_146306	7	116024117	116025118	1002	+		0	0	0		0	0	0		0	0	0		0	0	0
1657	Gga2	golgi associated, gamma adaptin ear containing,	NM_028758	7	129130236	129164712	4891	+		1226	35.9	7.34		1084	37.46	7.65		2336	108.3	22.14		6965	314.69	64.34
1658	Atf5	ativating transcription factor 5	NM_030693	7	52067628	52071942	1710	+		327	9.57	5.59		468	16.17	9.45		1131	52.43	30.66		2023	91.4	53.45
1659	Olfr492	olfactory receptor 492	NM_146497	7	115466244	115467188	945	+		0	0	0		0	0	0		0	0	0		0	0	0
1660	D7Ertd443e	hypothetical protein LOC71007	NM_001081331	7	141457945	141568511	2425	+		11425	334.64	137.99		7962	275.19	113.48		158	7.32	3.01		1	0.04	0.01
1661	Tbc1d17	TBC1 domain family member 17	NM_001042655	7	52096146	52104449	2601	+		56	1.64	0.63		83	2.86	1.09		494	22.9	8.8		610	27.56	10.59
1662	Zfp551	zinc finger protein 551	NM_001033820	7	13000497	13007840	2336	+		39	1.14	0.48		59	2.03	0.86		14	0.64	0.27		56	2.53	1.08
1663	Cdc42ep5	cdc42 effector protein 5	NM_021454	7	4102862	4116301	867	+		73	2.13	2.45		13	0.44	0.5		86	3.98	4.59		360	16.26	18.75
1664	Olfr310	olfactory receptor 310	NM_001011520	7	93417299	93418297	999	+		8	0.23	0.23		3	0.1	0.1		0	0	0		0	0	0
1665	Olfr551	olfactory receptor 551	NM_146755	7	109736308	109737255	948	+		0	0	0		0	0	0		0	0	0		0	0	0
1666	Mctp2	multiple C2 and transmembrane domain-containing	NM_001024703	7	79222716	79451481	5810	+		9758	285.81	49.19		8597	297.14	51.14		19	0.88	0.15		57	2.57	0.44
1667	Clptm1	cleft lip and palate transmembrane protein 1	NM_019649	7	20216929	20250379	4147	+		6521	191	46.05		6458	223.2	53.82		2670	123.79	29.85		3566	161.12	38.85
1668	6330512M04Rik	CD225 family protein FLJ76511 homolog	NM_177265	7	149512015	149558164	3230	+		51	1.49	0.46		69	2.38	0.73		37	1.71	0.52		2	0.09	0.02
1669	Sh2b1	SH2B adapter protein 1 isoform 1	NM_001081459, NM_011363	7	133610508	133618644	3422	+		35	1.02	0.29		70	2.41	0.7		555	25.73	7.51		2056	92.89	27.14
1670	Zfp689	zinc finger protein 689	NM_175163	7	134585650	134592672	3637	+		39	1.14	0.31		60	2.07	0.56		76	3.52	0.96		125	5.64	1.55
1671	Vmn2r68-ps	vomeronasal receptor Vmn2r68	NM_001105181	7	92370028	92386214	2556	+		0	0	0		0	0	0		0	0	0		0	0	0
1672	Spint2	kunitz-type protease inhibitor 2 isoform b	NM_011464, NM_001082548	7	30041349	30066996	1477	+		1034	30.28	20.5		810	27.99	18.95		6905	320.15	216.75		4328	195.55	132.39
1673	Bckdha	2-oxoisovalerate dehydrogenase subunit alpha,	NM_007533	7	26414965	26443756	1655	+		409	11.97	7.23		431	14.89	8.99		810	37.55	22.68		1347	60.86	36.77
1674	Atxn2l	ataxin-2-like protein	NM_183020	7	133635222	133646816	3764	+		42602	1247.82	331.51		33285	1150.43	305.64		2950	136.77	36.33		13635	616.06	163.67
1675	Irf7	interferon regulatory factor 7	NM_016850	7	148449088	148452300	1830	+		0	0	0		0	0	0		888	41.17	22.49		330	14.91	8.14
1676	Zscan4d	zinc finger and SCAN domain containing protein	NM_001100186	7	11746992	11751497	1992	+		50	1.46	0.73		50	1.72	0.86		0	0	0		21	0.94	0.47
1677	Ctsd	cathepsin D precursor	NM_009983	7	149561821	149573775	1979	+		1827	53.51	27.03		2159	74.62	37.7		151773	7036.99	3555.83		7112	321.33	162.36
1678	Spaca4	sperm acrosome membrane-associated protein 4	NM_027055	7	52980478	52981177	700	+		0	0	0		1	0.03	0.04		134	6.21	8.87		0	0	0
1679	Adam8	disintegrin and metalloproteinase	NM_007403	7	147164840	147178387	3034	+		210	6.15	2.02		259	8.95	2.94		8695	403.14	132.87		81	3.65	1.2
1680	Gemin7	gem (nuclear organelle) associated protein 7	NM_027189	7	20150298	20158692	763	+		3615	105.88	138.76		2796	96.63	126.64		595	27.58	36.14		400	18.07	23.68
1681	Pira11	paired-Ig-like receptor A11	NM_011088	7	3789756	3849695	2102	+		0	0	0		1	0.03	0.01		192	8.9	4.23		1	0.04	0.01
1682	2610034B18Rik	hypothetical protein LOC70420	NM_027420	7	87070245	87080150	2184	+		42	1.23	0.56		39	1.34	0.61		160	7.41	3.39		75	3.38	1.54
1683	Ap3b2	AP-3 complex subunit beta-2	NM_021492	7	88605285	88638811	3816	+		179	5.24	1.37		209	7.22	1.89		5	0.23	0.06		265	11.97	3.13
1684	Sec1	fucosyltransferase 10	NM_019934	7	52933057	52934928	1880	+		21	0.61	0.32		65	2.24	1.19		114	5.28	2.8		59	2.66	1.41
1685	Olfr571	olfactory receptor 571	NM_147085	7	110057383	110058351	969	+		0	0	0		0	0	0		0	0	0		0	0	0
1686	Nfatc2ip	NFATC2-interacting protein	NM_010900	7	133526368	133540251	3388	+		365	10.69	3.15		422	14.58	4.3		305	14.14	4.17		4618	208.65	61.58
1687	Vmn1r65	vomeronasal 1 receptor, D6	NM_030738	7	5959352	5962612	2686	+		1	0.02	0		0	0	0		0	0	0		0	0	0
1688	Mmp21	matrix metalloproteinase-21 precursor	NM_152944	7	140865953	140871744	1858	+		1	0.02	0.01		0	0	0		0	0	0		0	0	0
1689	Grik5	glutamate receptor, ionotropic kainate 5	NM_008168	7	25794870	25857388	3861	+		155	4.53	1.17		165	5.7	1.47		257	11.91	3.08		303	13.69	3.54
1690	Trpm5	transient receptor potential cation channel	NM_020277	7	150257434	150280547	4383	+		1	0.02	0		0	0	0		8	0.37	0.08		3	0.13	0.02
1691	Sult2b1	sulfotransferase family cytosolic 2B member 1	NM_017465	7	52985353	53014892	1127	+		66	1.93	1.71		119	4.11	3.64		642	29.76	26.4		70	3.16	2.8
1692	Ccdc155	coiled-coil domain-containing protein 155	NM_201374	7	52439046	52460262	2225	+		1626	47.62	21.4		1475	50.98	22.91		101	4.68	2.1		63	2.84	1.27
1693	Vmn2r29	vomeronasal 2, receptor 29	NM_001113468	7	7184038	7200039	2559	+		1	0.02	0		1	0.03	0.01		1	0.04	0.01		0	0	0
1694	Atp2a1	sarcoplasmic/endoplasmic reticulum calcium	NM_007504	7	133589374	133606587	3486	+		1	0.02	0		1	0.03	0		13	0.6	0.17		6	0.27	0.07
1695	Plekha7	pleckstrin homology domain containing, family A	NM_172743	7	123267632	123333355	4312	+		17	0.49	0.11		51	1.76	0.4		117	5.42	1.25		2780	125.6	29.12
1696	Idh2	isocitrate dehydrogenase [NADP], mitochondrial	NM_173011	7	87239734	87260207	1679	+		11	0.32	0.19		24	0.82	0.48		1424	66.02	39.32		3878	175.21	104.35
1697	Uros	uroporphyrinogen-III synthase	NM_009479	7	140878013	140900978	1811	+		301	8.81	4.86		220	7.6	4.19		137	6.35	3.5		244	11.02	6.08
1698	Olfr493	olfactory receptor 493	NM_146310	7	115489549	115490493	945	+		0	0	0		0	0	0		0	0	0		0	0	0
1699	Vmn2r33	vomeronasal 2, receptor33	NM_001105065	7	7503678	7549144	2586	+		0	0	0		0	0	0		0	0	0		0	0	0
1700	Olfr532	olfactory receptor 532	NM_147026	7	147604741	147605670	930	+		0	0	0		0	0	0		0	0	0		0	0	0
1701	Xpo6	exportin 6	NM_028816	7	133245233	133343922	4493	+		2484	72.75	16.19		2879	99.5	22.14		2270	105.24	23.42		5519	249.36	55.49
1702	Rlbp1	retinaldehyde-binding protein 1	NM_020599, NM_001173483	7	86519757	86529671	1869	+		4	0.11	0.05		5	0.17	0.09		11	0.51	0.27		120	5.42	2.89
1703	Mrgpra6	mas-related G-protein coupled receptor member	NM_205821	7	54441136	54444725	905	+		0	0	0		0	0	0		0	0	0		0	0	0
1704	Crym	mu-crystallin homolog	NM_016669	7	127329898	127345502	1256	+		132	3.86	3.07		140	4.83	3.84		29	1.34	1.06		54	2.43	1.93
1705	Thrsp	thyroid hormone-inducible hepatic protein	NM_009381	7	104561467	104566020	1051	+		0	0	0		0	0	0		123	5.7	5.42		32	1.44	1.37
1706	Scube2	signal peptide, CUB and EGF-like	NM_020052	7	116942163	117009168	3666	+		1	0.02	0		2	0.06	0.01		45	2.08	0.56		24	1.08	0.29
1707	Bloc1s3	biogenesis of lysosome-related organelles	NM_177692	7	20091153	20093680	1850	+		95	2.78	1.5		93	3.21	1.73		198	9.18	4.96		164	7.4	4
1708	Pold1	DNA polymerase delta catalytic subunit	NM_011131	7	51788119	51804186	3445	+		387	11.33	3.28		809	27.96	8.11		214	9.92	2.87		7224	326.4	94.74
1709	Iqgap1	ras GTPase-activating-like protein IQGAP1	NM_016721	7	87857671	87948180	6124	+		1055	30.9	5.04		1914	66.15	10.8		10024	464.76	75.89		5072	229.16	37.41
1710		hypothetical protein LOC545963	NM_001033792	7	53038302	53039837	1429	+		0	0	0		1	0.03	0.02		1	0.04	0.02		4	0.18	0.12
1711	Olfr298	olfactory receptor 298	NM_001011751	7	93637061	93638059	999	+		0	0	0		0	0	0		0	0	0		0	0	0
1712	Abcc8	ATP-binding cassette, sub-family C (CFTR/MRP),	NM_011510	7	53359893	53435403	4952	+		1	0.02	0		0	0	0		5	0.23	0.04		37	1.67	0.33
1713	AI987944	hypothetical protein LOC233168 isoform 2	NM_183167	7	48629158	48648630	1822	+		6251	183.09	100.48		4271	147.61	81.01		75	3.47	1.9		60	2.71	1.48
1714	Pold3	DNA polymerase delta subunit 3	NM_133692	7	107230623	107270010	3002	+		14634	428.63	142.78		10676	368.99	122.91		776	35.97	11.98		3794	171.42	57.1
1715	Psma1	proteasome subunit alpha type-1	NM_011965	7	121408064	121419630	1255	+		3490	102.22	81.45		2263	78.21	62.31		1197	55.49	44.21		4609	208.24	165.92
1716	Anpep	aminopeptidase N	NM_008486	7	86966689	86987170	3367	+		0	0	0		2	0.06	0.01		9914	459.66	136.51		306	13.82	4.1
1717	Olfr1348	olfactory receptor 1348	NM_146913	7	6453997	6454935	939	+		0	0	0		0	0	0		0	0	0		0	0	0
1718	Homer2	homer protein homolog 2 isoform 3	NM_011983, NM_001164087, NM_001164086	7	88754614	88851680	1673	+		1509	44.19	26.41		285	9.85	5.88		78	3.61	2.15		223	10.07	6.01
1719	Rfpl4	ret finger protein-like 4A	NM_138954, NM_001145013	7	5061468	5068498	1604	+		55709	1631.73	1017.28		34838	1204.11	750.69		0	0	0		0	0	0
1720	Chst8	carbohydrate sulfotransferase 8	NM_175140	7	35459778	35597695	2105	+		7	0.2	0.09		66	2.28	1.08		365	16.92	8.03		229	10.34	4.91
1721	Olfr675	olfactory receptor 675	NM_001011848	7	112172539	112173480	942	+		0	0	0		0	0	0		0	0	0		0	0	0
1722	Psg28	pregnancy-specific glycoprotein 28	NM_054063	7	19007890	19017390	1970	+		0	0	0		0	0	0		0	0	0		0	0	0
1723	Msx3	homeo box, msh-like 3	NM_010836	7	147232156	147234985	2207	+		0	0	0		1	0.03	0.01		0	0	0		1	0.04	0.01
1724	Pou2f2	POU domain, class 2, transcription factor 2	NM_001163554, NM_001163555, NM_001163556, NM_011138	7	25877675	25917479	1761	+		747	21.87	12.41		779	26.92	15.28		51	2.36	1.34		21	0.94	0.53
1725	Olfr629	olfactory receptor 629	NM_146821	7	110888715	110889836	1122	+		0	0	0		0	0	0		0	0	0		0	0	0
1726	Taf10	TAF10 RNA polymerase II, TATA box binding	NM_020024	7	112891408	112892852	787	+		861	25.21	32.03		830	28.68	36.44		681	31.57	40.11		744	33.61	42.7
1727	Cyp2s1	cytochrome P450 2S1	NM_028775	7	26587495	26601549	2621	+		38	1.11	0.42		29	1	0.38		86	3.98	1.51		274	12.38	4.72
1728	Olfr480	olfactory receptor 480	NM_020291	7	115209282	115210310	1029	+		0	0	0		0	0	0		0	0	0		0	0	0
1729	Mboat7	lysophospholipid acyltransferase 7	NM_029934	7	3629391	3645127	2880	+		487	14.26	4.95		671	23.19	8.05		758	35.14	12.2		1071	48.39	16.8
1730	4931406B18Rik	hypothetical protein LOC74054	NM_028737	7	50747414	50761308	3970	+		0	0	0		0	0	0		29	1.34	0.33		0	0	0
1731	Saa1	serum amyloid A-1 protein precursor	NM_009117	7	53995869	53998350	607	+		0	0	0		0	0	0		33	1.53	2.52		5	0.22	0.36
1732	Zfp583	zinc finger protein 583	NM_001033249	7	6267267	6282036	2765	+		342	10.01	3.62		219	7.56	2.73		13	0.6	0.21		101	4.56	1.64
1733	Il27	interleukin-27 subunit alpha precursor	NM_145636	7	133732809	133738424	705	+		0	0	0		0	0	0		2	0.09	0.12		2	0.09	0.12
1734	Vmn2r74	vomeronasal receptor Vmn2r74	NM_001105187	7	93100377	93109992	2562	+		0	0	0		0	0	0		0	0	0		0	0	0
1735	Oscar	osteoclast-associated immunoglobulin-like	NM_175632	7	3561417	3567735	1833	+		6	0.17	0.09		9	0.31	0.16		58	2.68	1.46		3	0.13	0.07
1736	Ush1c	harmonin isoform b4	NM_023649, NM_153677, NM_001163733	7	53450727	53493860	3084	+		0	0	0		0	0	0		32	1.48	0.47		30	1.35	0.43
1737	Tdrd12	tudor domain-containing protein 12 isoform 2	NM_028034	7	36278629	36322763	1621	+		6804	199.29	122.94		5070	175.23	108.09		55	2.55	1.57		956	43.19	26.64
1738	Lrrc68	leucine-rich repeat-containing protein 68	NM_199149	7	20116316	20147747	2971	+		3398	99.52	33.49		3649	126.12	42.45		980	45.43	15.29		1069	48.3	16.25
1739	Mrgprg	mas-related G-protein coupled receptor member G	NM_203492	7	150949615	150952898	1847	+		0	0	0		0	0	0		0	0	0		0	0	0
1740	Rhcg	ammonium transporter Rh type C	NM_019799	7	86738255	86762534	2093	+		15	0.43	0.2		10	0.34	0.16		99	4.59	2.19		13	0.58	0.27
1741	Hbb-b2	hemoglobin subunit beta-2	NM_016956	7	110961038	110962417	632	+		0	0	0		0	0	0		137	6.35	10.04		0	0	0
1742	Olfr668	olfactory receptor 668	NM_147059	7	112073320	112074276	957	+		0	0	0		0	0	0		0	0	0		0	0	0
1743	Olfr488	olfactory receptor 488	NM_146732	7	115398706	115399650	945	+		0	0	0		0	0	0		0	0	0		0	0	0
1744	Fxyd5	FXYD domain-containing ion transport regulator	NM_001111073, NM_008761	7	31817742	31827341	1144	+		7	0.2	0.17		8	0.27	0.23		4510	209.1	182.77		54	2.43	2.12
1745	Nkx6-2	NK6 transcription factor related, locus 2	NM_183248	7	146765198	146768692	1980	+		269	7.87	3.97		304	10.5	5.3		174	8.06	4.07		228	10.3	5.2
1746	Spib	transcription factor Spi-B	NM_019866	7	51781365	51787441	2786	+		1	0.02	0		3	0.1	0.03		122	5.65	2.02		12	0.54	0.19
1747	Itpkc	inositol-trisphosphate 3-kinase C	NM_181593	7	27992189	28013616	3260	+		17	0.49	0.15		34	1.17	0.35		191	8.85	2.71		509	22.99	7.05
1748	Thumpd1	THUMP domain-containing protein 1	NM_145585	7	126858608	126864279	2668	+		4365	127.85	47.91		3487	120.52	45.17		581	26.93	10.09		3030	136.9	51.31
1749	Lair1	leukocyte-associated immunoglobulin-like	NM_178611, NM_001113474	7	3958675	4014806	3512	+		183	5.36	1.52		185	6.39	1.81		1031	47.8	13.61		2	0.09	0.02
1750	Apoc4	apolipoprotein C-IV precursor	NM_007385	7	20263443	20266765	478	+		0	0	0		0	0	0		18	0.83	1.73		5	0.22	0.46
1751	Bcam	basal cell adhesion molecule	NM_020486	7	20341487	20355881	2407	+		1	0.02	0		8	0.27	0.11		1464	67.87	28.19		5174	233.77	97.12
1752	Furin	furin preproprotein	NM_011046, NM_001081454	7	87534080	87550317	4286	+		17367	508.68	118.68		18579	642.15	149.82		3290	152.54	35.59		787	35.55	8.29
1753	Ccdc9	coiled-coil domain-containing protein 9 isoform	NM_172297, NM_001136471	7	16860813	16870008	2033	+		784	22.96	11.29		816	28.2	13.87		452	20.95	10.3		1070	48.34	23.77
1754	Clrn3	clarin-3	NM_178669	7	142703139	142720337	3315	+		0	0	0		0	0	0		0	0	0		0	0	0
1755	Vmn1r85	vomeronasal 1 receptor 85	NM_145847	7	13669638	13670564	927	+		0	0	0		0	0	0		0	0	0		0	0	0
1756	Olfr630	olfactory receptor 630	NM_147098	7	110902664	110905864	1544	+		0	0	0		0	0	0		0	0	0		0	0	0
1757	Cblc	signal transduction protein CBL-C isoform 2	NM_001161844, NM_023224	7	20365067	20382158	1677	+		19	0.55	0.32		2	0.06	0.03		96	4.45	2.65		117	5.28	3.14
1758	Nlrp2	NACHT, leucine rich repeat and PYD containing 2	NM_177690	7	5250149	5302637	3404	+		20012	586.15	172.19		16269	562.3	165.18		0	0	0		1	0.04	0.01
1759	Arhgap17	rho GTPase-activating protein 17 isoform e	NM_144529, NM_001122640, NM_001122642, NM_001122641, NM_001122643	7	130422663	130513429	3551	+		2925	85.67	24.12		3189	110.22	31.03		944	43.76	12.32		1895	85.62	24.11
1760	Nup98	nuclear pore complex protein Nup98	NM_022979	7	109282717	109358634	4070	+		16706	489.32	120.22		9400	324.89	79.82		5086	235.81	57.93		3484	157.41	38.67
1761	6430531B16Rik	hypothetical protein LOC381933	NM_001033465	7	147158202	147164654	1161	+		8	0.23	0.19		0	0	0		212	9.82	8.45		39	1.76	1.51
1762	Ceacam2	carcinoembryonic antigen-related cell adhesion	NM_001113368, NM_001113369, NM_007543	7	26301061	26325023	3827	+		236	6.91	1.8		122	4.21	1.1		48	2.22	0.58		4	0.18	0.04
1763	Vmn2r53	vomeronasal 2, receptor 53	NM_001104644	7	13166819	13191893	2421	+		748	21.9	9.04		423	14.62	6.03		40	1.85	0.76		381	17.21	7.1
1764	Olfr522	olfactory receptor 522	NM_146952	7	147347909	147348847	939	+		0	0	0		0	0	0		0	0	0		0	0	0
1765	Nmb	neuromedin-B precursor	NM_026523	7	88047122	88049922	661	+		56	1.64	2.48		62	2.14	3.23		136	6.3	9.53		93	4.2	6.35
1766	Tsg101	tumor susceptibility gene 101 protein	NM_021884	7	54144397	54175300	1832	+		3010	88.16	48.12		2050	70.85	38.67		623	28.88	15.76		1090	49.24	26.87
1767	Olfr490	olfactory receptor 490	NM_146498	7	115429694	115430638	945	+		0	0	0		0	0	0		0	0	0		0	0	0
1768	Olfr655	olfactory receptor 655	NM_146820	7	111744767	111745693	927	+		0	0	0		0	0	0		0	0	0		0	0	0
1769	2210411K11Rik	hypothetical protein LOC664968	NM_029384	7	4736387	4741162	1051	+		2	0.05	0.04		5	0.17	0.16		177	8.2	7.8		114	5.15	4.9
1770	Sult2a6	sulfotransferase family 2A member 1 family	NM_001081325	7	14807826	14840182	858	+		1	0.02	0.02		1	0.03	0.03		0	0	0		0	0	0
1771	Lsm14a	protein LSM14 homolog A	NM_025948	7	35129739	35174559	2724	+		19510	571.45	209.78		13505	466.77	171.35		1306	60.55	22.22		5001	225.95	82.94
1772	Irgc1	interferon-inducible GTPase 5	NM_199013	7	25216945	25230701	1831	+		4	0.11	0.06		3	0.1	0.05		6043	280.18	153.02		0	0	0
1773	Fut2	galactoside 2-alpha-L-fucosyltransferase 2	NM_018876	7	52903965	52921678	2865	+		13	0.38	0.13		10	0.34	0.11		34	1.57	0.54		25	1.12	0.39
1774	Cd33	myeloid cell surface antigen CD33 isoform 1	NM_021293, NM_001111058	7	50782826	50788541	2571	+		0	0	0		0	0	0		344	15.94	6.19		0	0	0
1775	Catsperg2	cation channel sperm-associated protein subunit	NM_029714	7	30482238	30512034	3957	+		0	0	0		1	0.03	0		118	5.47	1.38		4	0.18	0.04
1776	Olfr623	olfactory receptor 623	NM_147122	7	110808809	110809762	954	+		0	0	0		0	0	0		0	0	0		0	0	0
1777	Nudt19	nucleoside diphosphate-linked moiety X motif 19,	NM_033080	7	36332204	36340947	1927	+		468	13.7	7.1		608	21.01	10.9		367	17.01	8.82		826	37.32	19.36
1778	Vmn2r32	vomeronasal 2, receptor 32	NM_001105063	7	7416680	7432684	2559	+		0	0	0		0	0	0		0	0	0		0	0	0
1779	Bcl7c	B-cell CLL/lymphoma 7 protein family member C	NM_009746	7	134848492	134852280	981	+		2762	80.89	82.45		2318	80.11	81.66		343	15.9	16.2		838	37.86	38.59
1780	Erf	ETS domain-containing transcription factor ERF	NM_010155	7	26027579	26035684	3440	+		393	11.51	3.34		304	10.5	3.05		596	27.63	8.03		6525	294.81	85.7
1781	Leng1	leukocyte receptor cluster member 1 homolog	NM_027203	7	3611709	3617442	2213	+		785	22.99	10.38		967	33.42	15.1		215	9.96	4.5		528	23.85	10.77
1782	Zfp27	zinc finger protein 27	NM_011754, NM_001037707	7	30678356	30691123	3529	+		615	18.01	5.1		201	6.94	1.96		141	6.53	1.85		117	5.28	1.49
1783	Olfr78	olfactory receptor 78	NM_130866, NM_001168503	7	109889245	109907909	3409	+		0	0	0		1	0.03	0		0	0	0		0	0	0
1784	Ap2a1	AP-2 complex subunit alpha-1 isoform a	NM_007458, NM_001077264	7	52155743	52184860	3457	+		733	21.46	6.2		845	29.2	8.44		1973	91.47	26.45		5580	252.11	72.92
1785	Olfr530	olfactory receptor 530	NM_146519	7	147558584	147559507	924	+		0	0	0		0	0	0		0	0	0		0	0	0
1786	C330005M16Rik	iron/zinc purple acid phosphatase-like protein	NM_175319	7	29392656	29416034	1923	+		17	0.49	0.25		16	0.55	0.28		0	0	0		29	1.31	0.68
1787	Zfp82	zinc finger protein 82	NM_177889	7	30841053	30857842	2093	+		289	8.46	4.04		231	7.98	3.81		17	0.78	0.37		132	5.96	2.84
1788	Map3k10	mitogen-activated protein kinase kinase kinase	NM_001081292	7	28441396	28459617	3690	+		1757	51.46	13.94		2094	72.37	19.61		1360	63.05	17.08		500	22.59	6.12
1789	Wbp7	histone-lysine N-methyltransferase MLL4	NM_029274	7	31353874	31373745	8457	+		9610	281.47	33.28		11029	381.19	45.07		1026	47.57	5.62		3968	179.28	21.19
1790	Polg	DNA polymerase subunit gamma-1	NM_017462	7	86594269	86611159	4596	+		1613	47.24	10.27		793	27.4	5.96		580	26.89	5.85		2391	108.03	23.5
1791	Dctpp1	dCTP pyrophosphatase 1	NM_023203	7	134400476	134404181	648	+		545	15.96	24.62		440	15.2	23.45		147	6.81	10.5		3017	136.31	210.35
1792	Gpr77	C5a anaphylatoxin chemotactic receptor C5L2	NM_001146005, NM_176912	7	16820075	16829503	3378	+		28	0.82	0.24		19	0.65	0.19		100	4.63	1.37		1	0.04	0.01
1793	Nkx1-2	NK1 homeobox 2	NM_009123	7	139787922	139791320	1903	+		0	0	0		0	0	0		1	0.04	0.02		36	1.62	0.85
1794	Tarm1	T-cell-interacting, activating receptor on	NM_177363	7	3489957	3503433	957	+		150	4.39	4.58		112	3.87	4.04		7	0.32	0.33		59	2.66	2.77
1795	Olfr690	olfactory receptor 690	NM_020290	7	112477757	112478720	966	+		2	0.05	0.05		0	0	0		0	0	0		0	0	0
1796	Nlrp9c	NACHT, LRR and PYD domains-containing protein	NM_001042612	7	27149906	27179262	3020	+		15288	447.78	148.27		10934	377.91	125.13		0	0	0		1	0.04	0.01
1797	2210018M11Rik	protein EMSY	NM_172280	7	105739116	105805079	4031	+		1630	47.74	11.84		1392	48.11	11.93		207	9.59	2.37		1234	55.75	13.83
1798	Olfr600	olfactory receptor 600	NM_147046	7	110494496	110495440	945	+		0	0	0		0	0	0		0	0	0		0	0	0
1799	Slco3a1	solute carrier organic anion transporter family	NM_001038643, NM_023908	7	81420304	81699666	4697	+		15724	460.55	98.05		4904	169.49	36.08		243	11.26	2.39		19	0.85	0.18
1800	Dkkl1	dickkopf-like protein 1 precursor	NM_015789	7	52462895	52467221	906	+		1	0.02	0.02		2	0.06	0.06		1578	73.16	80.75		63	2.84	3.13
1801	Trim30d	tripartite motif-containing 79 isoform 2	NM_001167828, NM_199146	7	111620363	111656339	1912	+		887	25.98	13.58		599	20.7	10.82		272	12.61	6.59		97	4.38	2.29
1802	Th	tyrosine hydroxylase	NM_009377	7	150078681	150085871	1757	+		1275	37.34	21.25		1482	51.22	29.15		11	0.51	0.29		3	0.13	0.07
1803	Fes	tyrosine-protein kinase Fes/Fps	NM_010194	7	87522644	87532832	2780	+		5	0.14	0.05		5	0.17	0.06		858	39.78	14.3		40	1.8	0.64
1804	Psenen	presenilin enhancer 2	NM_025498	7	31346885	31348203	670	+		1594	46.68	69.67		886	30.62	45.7		314	14.55	21.71		184	8.31	12.4
1805	Axl	tyrosine-protein kinase receptor UFO isoform 3	NM_009465, NM_001190975, NM_001190974	7	26542292	26573560	4119	+		9	0.26	0.06		17	0.58	0.14		947	43.9	10.65		145	6.55	1.59
1806	Zfp536	zinc finger protein 536	NM_172385	7	38264128	38554771	4411	+		9	0.26	0.05		4	0.13	0.02		28	1.29	0.29		42	1.89	0.42
1807	BC048679	hypothetical protein LOC210321 isoform 1	NM_183143, NM_001193274	7	88639161	88643167	539	+		0	0	0		0	0	0		8	0.37	0.68		2	0.09	0.16
1808	Chd2	chromodomain helicase DNA binding protein 2	NM_001081345	7	80574494	80682507	5794	+		90	2.63	0.45		128	4.42	0.76		690	31.99	5.52		1454	65.69	11.33
1809	Mki67	antigen KI-67	NM_001081117	7	142881471	142908062	10098	+		11743	343.95	34.06		9242	319.43	31.63		240	11.12	1.1		4631	209.24	20.72
1810	Pdcd5	programmed cell death protein 5	NM_019746	7	36427004	36432501	642	+		1071	31.36	48.84		685	23.67	36.86		495	22.95	35.74		898	40.57	63.19
1811	Olfr684	olfactory receptor 684	NM_207249	7	112305256	112306194	939	+		0	0	0		0	0	0		0	0	0		0	0	0
1812	Olfr64	olfactory receptor 64	NM_013617	7	111041324	111042985	1662	+		0	0	0		0	0	0		0	0	0		0	0	0
1813	Hcst	hematopoietic cell signal transducer precursor	NM_011827	7	31202731	31204873	490	+		1	0.02	0.04		11	0.38	0.77		197	9.13	18.63		0	0	0
1814	Cdr2	cerebellar degeneration-related protein 2	NM_007672	7	128100550	128125826	2525	+		8128	238.07	94.28		5765	199.25	78.91		315	14.6	5.78		969	43.78	17.33
1815	Ndufab1	acyl carrier protein, mitochondrial isoform 3	NM_028177	7	129231558	129245362	800	+		611	17.89	22.36		516	17.83	22.28		209	9.69	12.11		665	30.04	37.54
1816	Cd2bp2	CD2 antigen cytoplasmic tail-binding protein 2	NM_027353	7	134335174	134339514	3284	+		2801	82.04	24.98		2496	86.26	26.26		837	38.8	11.81		3359	151.76	46.21
1817	Sepw1	selenoprotein W	NM_009156	7	16502557	16507720	722	+		3028	88.69	122.83		2249	77.73	107.65		2480	114.98	159.25		2172	98.13	135.91
1818	Trpm4	transient receptor potential cation channel	NM_175130	7	52558525	52589150	4245	+		1136	33.27	7.83		784	27.09	6.38		3314	153.65	36.19		6436	290.79	68.5
1819	Chrna7	neuronal acetylcholine receptor subunit alpha-7	NM_007390	7	70243578	70357412	2091	+		10	0.29	0.13		23	0.79	0.37		10	0.46	0.21		70	3.16	1.51
1820	Aldh1a3	aldehyde dehydrogenase family 1 member A3	NM_053080	7	73535779	73572363	3423	+		2	0.05	0.01		2	0.06	0.01		103	4.77	1.39		4	0.18	0.05
1821	Zfp954	hypothetical protein LOC232853	NM_172738	7	7067394	7074187	2042	+		16	0.46	0.22		32	1.1	0.53		78	3.61	1.76		246	11.11	5.44
1822	9130019O22Rik	hypothetical protein LOC78921	NM_030226	7	134525774	134530680	3878	+		7	0.2	0.05		17	0.58	0.14		29	1.34	0.34		13	0.58	0.14
1823	Foxa3	hepatocyte nuclear factor 3-gamma	NM_008260	7	19598632	19608888	2039	+		22	0.64	0.31		14	0.48	0.23		0	0	0		7	0.31	0.15
1824	Mrps12	28S ribosomal protein S12, mitochondrial	NM_011885	7	29524660	29526800	684	+		360	10.54	15.4		255	8.81	12.88		384	17.8	26.02		1386	62.62	91.54
1825	Vmn1r59	vomeronasal 1 receptor 59	NM_207543	7	5405429	5406361	933	+		0	0	0		3	0.1	0.1		0	0	0		0	0	0
1826	Fam160a2	FTS and Hook-interacting protein	NM_199009	7	112527124	112548525	3441	+		238	6.97	2.02		300	10.36	3.01		333	15.43	4.48		1044	47.17	13.7
1827	Dhx32	DEAH (Asp-Glu-Ala-His) box polypeptide 32	NM_133941	7	140912618	140968486	2962	+		3102	90.85	30.67		2588	89.44	30.19		474	21.97	7.41		2121	95.83	32.35
1828	Mapk1ip1	MAPK-interacting and spindle-stabilizing	NM_027115, NM_001045483	7	146027501	146037950	1524	+		4891	143.25	93.99		3729	128.88	84.56		184	8.53	5.59		475	21.46	14.08
1829	Olfr1347	olfactory receptor 1347	NM_146385	7	6440624	6441583	960	+		0	0	0		0	0	0		0	0	0		0	0	0
1830	Vmn1r83	vomeronasal 1 receptor 83	NM_134209	7	12906557	12907477	921	+		0	0	0		0	0	0		0	0	0		0	0	0
1831	Tnfrsf22	tumor necrosis factor receptor superfamily	NM_023680	7	150822630	150835543	2275	+		0	0	0		0	0	0		8	0.37	0.16		149	6.73	2.95
1832	1700026D08Rik	hypothetical protein LOC75556	NM_029335	7	90924129	90943336	1279	+		3	0.08	0.06		1	0.03	0.02		257	11.91	9.31		1	0.04	0.03
1833	Dusp8	dual specificity protein phosphatase 8	NM_008748	7	149267401	149276175	2452	+		17	0.49	0.19		13	0.44	0.17		36	1.66	0.67		67	3.02	1.23
1834	Dhdh	trans-1,2-dihydrobenzene-1,2-diol dehydrogenase	NM_027903	7	52728933	52744166	2738	+		32	0.93	0.33		20	0.69	0.25		221	10.24	3.73		402	18.16	6.63
1835	Olfr305	olfactory receptor 305	NM_146616	7	93511886	93512845	960	+		0	0	0		0	0	0		0	0	0		0	0	0
1836	Ppfia3	liprin-alpha-3	NM_029741	7	52594496	52622389	4882	+		6	0.17	0.03		3	0.1	0.02		5	0.23	0.04		217	9.8	2
1837	Olfr591	olfactory receptor 591	NM_001011847	7	110321205	110322149	945	+		0	0	0		0	0	0		0	0	0		0	0	0
1838	Zfand6	AN1-type zinc finger protein 6	NM_022985	7	91763564	91827861	1658	+		4654	136.31	82.21		3906	135	81.42		886	41.07	24.77		1389	62.75	37.84
1839	Tmem9b	transmembrane protein 9B precursor	NM_020050	7	116879350	116895777	1685	+		386	11.3	6.7		320	11.06	6.56		921	42.7	25.34		167	7.54	4.47
1840	Zfp473	zinc finger protein 473 homolog	NM_178734	7	51986856	52003987	3805	+		1840	53.89	14.16		3268	112.95	29.68		16	0.74	0.19		537	24.26	6.37
1841	1810020D17Rik	hypothetical protein LOC66273 isoform 4	NM_001177945, NM_001177947, NM_001177946, NM_183251	7	104698851	104727925	866	+		101	2.95	3.4		80	2.76	3.18		222	10.29	11.88		228	10.3	11.89
1842	Pcf11	Pcf11, isoform C	NM_029078	7	99792765	99818394	5233	+		1461	42.79	8.17		1228	42.44	8.11		771	35.74	6.82		2140	96.69	18.47
1843	Ifitm2	interferon-induced transmembrane protein 2	NM_030694	7	148140738	148141860	646	+		0	0	0		2	0.06	0.09		825	38.25	59.21		4207	190.08	294.24
1844	Tjp1	tight junction protein ZO-1 isoform 2	NM_001163574, NM_009386	7	72441054	72516125	7046	+		10084	295.36	41.91		9238	319.29	45.31		775	35.93	5.09		3835	173.27	24.59
1845	Nadsyn1	glutamine-dependent NAD(+) synthetase	NM_030221	7	150981499	151008746	2632	+		1113	32.6	12.38		947	32.73	12.43		128	5.93	2.25		157	7.09	2.69
1846	Rhog	rho-related GTP-binding protein RhoG precursor	NM_019566	7	109387637	109398632	1264	+		6	0.17	0.13		3	0.1	0.07		1450	67.22	53.18		128	5.78	4.57
1847	Chid1	chitinase domain-containing protein 1 isoform 1	NM_001142681, NM_026522	7	148679037	148725703	3910	+		1045	30.6	7.82		865	29.89	7.64		1030	47.75	12.21		534	24.12	6.16
1848	Pop4	ribonuclease P protein subunit p29	NM_025390	7	39047839	39056367	1214	+		2654	77.73	64.02		528	18.24	15.02		355	16.45	13.55		1427	64.47	53.1
1849	Olfr667	olfactory receptor 667	NM_147060	7	112064828	112065808	981	+		50	1.46	1.48		74	2.55	2.59		0	0	0		0	0	0
1850	Vmn2r30	vomeronasal 2, receptor, 15	NM_009490	7	7264985	7290204	2559	+		0	0	0		0	0	0		0	0	0		0	0	0
1851	Trim68	E3 ubiquitin-protein ligase TRIM68	NM_198012	7	109826094	109835840	2389	+		731	21.41	8.96		564	19.49	8.15		104	4.82	2.01		48	2.16	0.9
1852	Abpb	androgen binding protein beta	NM_001100464	7	34796951	34798961	567	+		0	0	0		0	0	0		0	0	0		0	0	0
1853	Vkorc1	vitamin K epoxide reductase complex subunit 1	NM_178600	7	135036577	135039131	764	+		4089	119.76	156.75		3185	110.08	144.08		701	32.5	42.53		293	13.23	17.31
1854	Sae1	SUMO-activating enzyme subunit 1	NM_019748	7	16912403	16973134	1871	+		658	19.27	10.29		649	22.43	11.98		908	42.09	22.49		10311	465.87	248.99
1855	Ern2	serine/threonine-protein kinase/endoribonuclease	NM_012016	7	129313407	129329730	2973	+		6	0.17	0.05		7	0.24	0.08		0	0	0		0	0	0
1856	Scaf1	splicing factor, arginine/serine-rich 19	NM_001008422	7	52258320	52271619	4195	+		4971	145.6	34.7		6397	221.1	52.7		1122	52.02	12.4		5164	233.32	55.61
1857	Zbtb32	zinc finger and BTB domain-containing protein	NM_021397	7	31374700	31377961	1783	+		341	9.98	5.59		209	7.22	4.04		173	8.02	4.49		345	15.58	8.73
1858	Vmn2r67	vomeronasal receptor Vmn2r67	NM_001102579	7	92284750	92304412	2556	+		0	0	0		0	0	0		0	0	0		0	0	0
1859	Zfp940	zinc finger protein 940	NM_173738	7	30628955	30638667	2806	+		490	14.35	5.11		436	15.06	5.36		10	0.46	0.16		233	10.52	3.74
1860	Mesp1	mesoderm posterior protein 1	NM_008588	7	86937127	86938492	1122	+		0	0	0		1	0.03	0.02		110	5.1	4.54		1	0.04	0.03
1861	Kcnk6	potassium inwardly-rectifying channel, subfamily	NM_001033525	7	30006947	30017541	4089	+		0	0	0		0	0	0		544	25.22	6.16		66	2.98	0.72
1862	Trim21	E3 ubiquitin-protein ligase TRIM21	NM_001082552, NM_009277	7	109706436	109713983	2775	+		1	0.02	0		4	0.13	0.04		137	6.35	2.28		291	13.14	4.73
1863	BC017158	hypothetical protein LOC233913	NM_145590	7	135414893	135441615	2603	+		825	24.16	9.28		716	24.74	9.5		280	12.98	4.98		214	9.66	3.71
1864	Dennd5a	DENN domain-containing protein 5A	NM_021494	7	117037295	117103936	4972	+		655	19.18	3.85		684	23.64	4.75		1576	73.07	14.69		1632	73.73	14.82
1865	Csrp3	cysteine and glycine-rich protein 3	NM_013808, NM_001198841	7	56085768	56099021	1037	+		0	0	0		0	0	0		3	0.13	0.12		0	0	0
1866	Zg16	zymogen granule membrane protein 16 precursor	NM_026918	7	134193670	134195491	636	+		12	0.35	0.55		5	0.17	0.26		0	0	0		0	0	0
1867	Apoe	apolipoprotein E precursor	NM_009696	7	20281593	20284515	1266	+		254	7.43	5.86		307	10.61	8.38		80616	3737.78	2952.43		16234	733.49	579.37
1868	Olfr666	olfactory receptor 666	NM_147096	7	112041184	112042140	957	+		1	0.02	0.02		0	0	0		0	0	0		0	0	0
1869	Nrip3	nuclear receptor-interacting protein 3	NM_020610	7	116901570	116925059	3913	+		10	0.29	0.07		95	3.28	0.83		16	0.74	0.18		69	3.11	0.79
1870	Actn4	alpha-actinin-4	NM_021895	7	29678273	29747299	3859	+		5929	173.66	45		7773	268.66	69.61		5901	273.6	70.89		16556	748.04	193.84
1871	Prss8	prostasin	NM_133351	7	135069230	135073618	1727	+		279	8.17	4.73		209	7.22	4.18		805	37.32	21.6		121	5.46	3.16
1872	Gm5114	hypothetical protein LOC330513	NM_177890	7	46662664	46668530	3047	+		0	0	0		0	0	0		6	0.27	0.08		0	0	0
1873	Ankrd42	ankyrin repeat domain 42	NM_028665	7	99732693	99785652	2801	+		369	10.8	3.85		319	11.02	3.93		672	31.15	11.12		43	1.94	0.69
1874	Tmem147	transmembrane protein 147	NM_027215	7	31512720	31514553	868	+		538	15.75	18.14		477	16.48	18.98		905	41.96	48.34		651	29.41	33.88
1875	Zfp111	zinc finger protein 111	NM_019940	7	24978234	24993168	7134	+		1110	32.51	4.55		1041	35.98	5.04		109	5.05	0.7		419	18.93	2.65
1876	St8sia2	alpha-2,8-sialyltransferase 8B	NM_009181	7	81084006	81158568	5376	+		0	0	0		0	0	0		1	0.04	0		6	0.27	0.05
1877	4930451I11Rik	hypothetical protein LOC78118	NM_183131	7	133973988	133975010	511	+		241	7.05	13.79		208	7.18	14.05		146	6.76	13.22		0	0	0
1878	Shisa7	protein shisa-7 precursor	NM_172737	7	4777154	4787857	5308	+		18	0.52	0.09		33	1.14	0.21		25	1.15	0.21		253	11.43	2.15
1879	Cib1	calcium and integrin-binding protein 1	NM_011870	7	87372046	87377502	837	+		836	24.48	29.24		682	23.57	28.16		4305	199.6	238.47		1227	55.43	66.22
1880	Olfr560	olfactory receptor 560	NM_147113	7	109901497	109902441	945	+		0	0	0		0	0	0		0	0	0		0	0	0
1881	Tmc7	transmembrane channel-like protein 7	NM_172476	7	125679358	125728200	4493	+		637	18.65	4.15		374	12.92	2.87		227	10.52	2.34		264	11.92	2.65
1882	P2ry6	P2Y purinoceptor 6	NM_183168	7	108086148	108112876	1976	+		0	0	0		0	0	0		568	26.33	13.32		7	0.31	0.15
1883	Prss53	serine protease 53 precursor	NM_001081268	7	135028958	135034484	2531	+		253	7.41	2.92		178	6.15	2.42		99	4.59	1.81		189	8.53	3.37
1884	Sox6	transcription factor SOX-6 isoform 2	NM_001025560, NM_001025559, NM_011445	7	122614858	123182258	8227	+		176	5.15	0.62		235	8.12	0.98		486	22.53	2.73		18	0.81	0.09
1885	Olfr616	olfactory receptor 616	NM_147099	7	110712838	110713791	954	+		0	0	0		0	0	0		0	0	0		0	0	0
1886	Apbb1	amyloid beta A4 precursor protein-binding family	NM_009685	7	112706998	112730049	2593	+		1652	48.38	18.65		1728	59.72	23.03		180	8.34	3.21		328	14.81	5.71
1887	Olfr536	olfactory receptor 536	NM_146520	7	147686752	147693217	3915	+		0	0	0		0	0	0		0	0	0		0	0	0
1888	Gm4763	hypothetical protein LOC210155	NM_177593	7	25507513	25509309	902	+		0	0	0		0	0	0		10	0.46	0.5		0	0	0
1889	Olfr308	olfactory receptor 308	NM_146621	7	93469534	93470460	927	+		0	0	0		0	0	0		0	0	0		0	0	0
1890	1600016N20Rik	hypothetical protein LOC72000	NM_028050	7	148395942	148399979	2051	+		42	1.23	0.59		42	1.45	0.7		557	25.82	12.58		26	1.17	0.57
1891	Dbx1	homeobox protein DBX1	NM_001005232	7	56886869	56892205	2096	+		5	0.14	0.06		1	0.03	0.01		0	0	0		0	0	0
1892	Vmn2r55	vomeronasal 2, receptor 55	NM_001104645	7	13237055	13270340	2346	+		0	0	0		0	0	0		0	0	0		0	0	0
1893	Cyp2a22	cytochrome P450, family 2, subfamily a,	NM_001101467	7	27716650	27724405	2226	+		0	0	0		2	0.06	0.02		0	0	0		0	0	0
1894	Ccne1	G1/S-specific cyclin-E1	NM_007633	7	38883003	38892509	2022	+		234	6.85	3.38		119	4.11	2.03		100	4.63	2.28		6459	291.83	144.32
1895	Arl6ip1	ADP-ribosylation factor-like protein	NM_019419	7	125262414	125273077	2080	+		13735	402.3	193.41		9755	337.16	162.09		3624	168.02	80.77		7631	344.78	165.75
1896	Apoc1	apolipoprotein C-I precursor	NM_001110009, NM_007469	7	20274830	20278007	515	+		0	0	0		0	0	0		145	6.72	13.04		428	19.33	37.53
1897	Etv2	ETS translocation variant 2	NM_007959	7	31418635	31420871	1050	+		0	0	0		0	0	0		16	0.74	0.7		32	1.44	1.37
1898	Nipa2	magnesium transporter NIPA2	NM_023647	7	63186957	63217820	3625	+		73	2.13	0.58		235	8.12	2.23		587	27.21	7.5		890	40.21	11.09
1899		hypothetical protein LOC330602	NM_183313	7	107078306	107081389	3086	+		0	0	0		0	0	0		1	0.04	0.01		1	0.04	0.01
1900	Stk32c	serine/threonine-protein kinase 32C isoform 2	NM_021302, NM_001162540	7	146289538	146374372	2200	+		2912	85.29	38.76		2266	78.32	35.6		350	16.22	7.37		20	0.9	0.4
1901	9930013L23Rik	KIAA1199 homolog precursor	NM_030728	7	91083299	91235012	5186	+		2	0.05	0		2	0.06	0.01		80	3.7	0.71		10	0.45	0.08
1902	Mag	myelin-associated glycoprotein	NM_010758	7	31684202	31699851	2427	+		0	0	0		1	0.03	0.01		50	2.31	0.95		0	0	0
1903	Apbh	androgen-binding protein eta precursor	NM_020563	7	32075538	32076835	425	+		0	0	0		0	0	0		0	0	0		0	0	0
1904	Supt5h	transcription elongation factor SPT5	NM_013676	7	29099915	29123738	3561	+		5988	175.38	49.25		5240	181.11	50.85		2478	114.89	32.26		8488	383.51	107.69
1905	Vmn1r64	vomeronasal 1 receptor 64	NM_207544	7	5835182	5836144	963	+		0	0	0		0	0	0		0	0	0		0	0	0
1906	Deaf1	deformed epidermal autoregulatory factor 1	NM_016874	7	148483084	148513477	2043	+		150	4.39	2.14		195	6.73	3.29		194	8.99	4.4		1677	75.77	37.08
1907	Rdh13	retinol dehydrogenase 13	NM_175372	7	4377269	4397211	3055	+		81	2.37	0.77		92	3.17	1.03		452	20.95	6.85		1091	49.29	16.13
1908	Olfr691	olfactory receptor 691	NM_147061	7	112485260	112486228	969	+		0	0	0		1	0.03	0.03		0	0	0		0	0	0
1909	Zfp715	zinc finger protein 715	NM_027264	7	50551893	50568631	4190	+		291	8.52	2.03		317	10.95	2.61		209	9.69	2.31		765	34.56	8.24
1910	Nsmce1	non-structural maintenance of chromosomes	NM_026330	7	132611158	132635049	1120	+		2874	84.18	75.16		1790	61.86	55.23		489	22.67	20.24		1048	47.35	42.27
1911	Ifitm6	interferon induced transmembrane protein 6	NM_001033632	7	148201711	148202791	541	+		1423	41.68	77.04		1036	35.8	66.17		55	2.55	4.71		5	0.22	0.4
1912	Pddc1	Parkinson disease 7 domain-containing protein 1	NM_172116	7	148594083	148600024	1497	+		275	8.05	5.37		327	11.3	7.54		557	25.82	17.24		544	24.57	16.41
1913	Tcerg1l	transcription elongation regulator 1-like	NM_183289	7	145400655	145589413	2569	+		162	4.74	1.84		94	3.24	1.26		4	0.18	0.07		15	0.67	0.26
1914	Vmn2r51	vomeronasal 2, receptor 51	NM_001105179	7	10672547	10691008	2559	+		387	11.33	4.42		181	6.25	2.44		0	0	0		0	0	0
1915	Nipa1	magnesium transporter NIPA1	NM_153578	7	63233854	63274943	1885	+		11	0.32	0.16		13	0.44	0.23		107	4.96	2.63		79	3.56	1.88
1916	Prmt1	protein arginine N-methyltransferase 1	NM_019830	7	52232128	52241702	1272	+		972	28.47	22.38		782	27.02	21.24		703	32.59	25.62		10895	492.26	386.99
1917	Ubqln3	ubiquilin-3	NM_198623	7	111289137	111291786	2369	+		0	0	0		0	0	0		4500	208.64	88.07		0	0	0
1918	Zp2	zona pellucida sperm-binding protein 2	NM_011775	7	127275875	127288804	2200	+		96569	2828.52	1285.69		90923	3142.59	1428.45		0	0	0		0	0	0
1919	Rpl13a	60S ribosomal protein L13a	NM_009438	7	52381146	52384105	803	+		2337	68.45	85.24		1662	57.44	71.53		6894	319.64	398.05		27371	1236.69	1540.08
1920	Olfr671	olfactory receptor 671	NM_001011755	7	112123556	112124497	942	+		0	0	0		0	0	0		0	0	0		0	0	0
1921	Gpr139	probable G-protein coupled receptor 139	NM_001024138	7	126287837	126327888	1038	+		1	0.02	0.01		0	0	0		0	0	0		1	0.04	0.03
1922	Psg17	pregnancy specific glycoprotein 17	NM_007677	7	19399286	19406940	2126	+		375	10.98	5.16		412	14.24	6.69		0	0	0		2	0.09	0.04
1923	Leng9	leukocyte receptor cluster member 9	NM_175529	7	4099785	4101474	1690	+		49	1.43	0.84		76	2.62	1.55		118	5.47	3.23		20	0.9	0.53
1924	Pycard	apoptosis-associated speck-like protein	NM_023258	7	135134887	135137381	2135	+		1	0.02	0		1	0.03	0.01		666	30.87	14.45		1116	50.42	23.61
1925	Olfr470	olfactory receptor 470	NM_146425	7	114988301	114989245	945	+		0	0	0		0	0	0		0	0	0		0	0	0
1926	4930404H21Rik	hypothetical protein LOC73808	NM_028654	7	140778707	140793798	945	+		38	1.11	1.17		32	1.1	1.16		132	6.12	6.47		0	0	0
1927	Pvr	PDGF- and VEGF-receptor related, isoform H	NM_027514	7	20488927	20506441	2862	+		18	0.52	0.18		32	1.1	0.38		314	14.55	5.08		940	42.47	14.83
1928	Vmn2r31	vomeronasal 2, receptor 31	NM_001105062	7	7336696	7352338	2586	+		0	0	0		0	0	0		0	0	0		0	0	0
1929	Palb2	partner and localizer of BRCA2	NM_001081238	7	129250779	129276460	3747	+		3177	93.05	24.83		1794	62	16.54		44	2.04	0.54		663	29.95	7.99
1930	Ceacam16	carcinoembryonic antigen-related cell adhesion	NM_001033419	7	20437446	20446648	1635	+		0	0	0		0	0	0		36	1.66	1.01		8	0.36	0.22
1931	Ftl1	ferritin light chain 1	NM_010240	7	52713314	52715256	986	+		314	9.19	9.32		351	12.13	12.3		36842	1708.18	1732.43		34610	1563.77	1585.97
1932	Lilra6	paired-Ig-like receptor A3	NM_011090	7	3860204	3867087	2101	+		20	0.58	0.27		5	0.17	0.08		9	0.41	0.19		0	0	0
1933	Olfr504	olfactory receptor 504	NM_001011858	7	115708351	115709307	957	+		0	0	0		0	0	0		0	0	0		0	0	0
1934	6330408A02Rik	hypothetical protein LOC321008	NM_177312	7	13844316	13864070	3366	+		239	7	2.07		213	7.36	2.18		81	3.75	1.11		166	7.5	2.22
1935	Rcn3	reticulocalbin-3 precursor	NM_026555	7	52338283	52347524	1421	+		5	0.14	0.09		7	0.24	0.16		306	14.18	9.97		1179	53.27	37.48
1936	Grlf1	glucocorticoid receptor DNA-binding factor 1	NM_172739	7	17079822	17200342	8393	+		4441	130.07	15.49		5160	178.34	21.24		1971	91.38	10.88		3048	137.71	16.4
1937	Kirrel2	kin of IRRE-like protein 2 precursor	NM_172898	7	31232785	31242534	3122	+		0	0	0		0	0	0		0	0	0		350	15.81	5.06
1938	Crtc3	CREB-regulated transcription coactivator 3	NM_173863	7	87731518	87833763	5110	+		873	25.57	5		976	33.73	6.6		292	13.53	2.64		87	3.93	0.76
1939	Zfp772	zinc finger protein 772	NM_145577	7	7154833	7162709	2772	+		18	0.52	0.18		43	1.48	0.53		37	1.71	0.61		148	6.68	2.4
1940	Nr1h2	oxysterols receptor LXR-beta	NM_009473	7	51805003	51809293	1964	+		1604	46.98	23.92		1534	53.02	26.99		978	45.34	23.08		2054	92.8	47.25
1941	Mrgprb1	mas-related G-protein coupled receptor member	NM_205810	7	55699483	55711712	4185	+		0	0	0		0	0	0		14	0.64	0.15		0	0	0
1942	Aqp11	aquaporin-11	NM_175105	7	104874889	104886757	1322	+		21	0.61	0.46		32	1.1	0.83		11174	518.08	391.89		102	4.6	3.47
1943	2200002D01Rik	HAI-2 related small protein	NM_028179	7	30032540	30033486	522	+		5	0.14	0.26		2	0.06	0.11		12	0.55	1.05		87	3.93	7.52
1944	Ptov1	prostate tumor over expressed gene 1	NM_133949	7	52118438	52125158	1897	+		2778	81.36	42.88		3722	128.64	67.81		1258	58.32	30.74		3769	170.29	89.76
1945	Olfr705	olfactory receptor 705	NM_147032	7	114016807	114017757	951	+		0	0	0		0	0	0		0	0	0		0	0	0
1946	Hps5	Hermansky-Pudlak syndrome 5 protein homolog	NM_001167864, NM_001005248, NM_001005247	7	54015836	54051048	4625	+		1416	41.47	8.96		1094	37.81	8.17		479	22.2	4.8		488	22.04	4.76
1947	Tnfrsf23	tumor necrosis factor receptor superfamily	NM_024290	7	150851712	150871777	3283	+		18	0.52	0.15		18	0.62	0.18		249	11.54	3.51		23	1.03	0.31
1948	Unc45a	protein unc-45 homolog A	NM_133952	7	87470179	87485094	3264	+		12	0.35	0.1		52	1.79	0.54		550	25.5	7.81		1424	64.34	19.71
1949	Zfp668	zinc finger protein 668	NM_146259	7	135008873	135020337	3451	+		15	0.43	0.12		41	1.41	0.4		146	6.76	1.95		446	20.15	5.83
1950	Dll3	delta-like protein 3	NM_007866	7	29078574	29086804	2163	+		150	4.39	2.02		174	6.01	2.77		56	2.59	1.19		29	1.31	0.6
1951	Echs1	enoyl-CoA hydratase, mitochondrial precursor	NM_053119	7	147291622	147302322	1491	+		1478	43.29	29.03		1215	41.99	28.16		1429	66.25	44.43		1995	90.13	60.44
1952	Ltbp4	latent transforming growth factor beta binding	NM_175641, NM_001113549	7	28090160	28122631	5322	+		28	0.82	0.15		105	3.62	0.68		971	45.02	8.45		3404	153.8	28.89
1953	Olfr2	olfactory receptor 2	NM_010983	7	114144389	114145372	984	+		0	0	0		0	0	0		0	0	0		0	0	0
1954	Fam154b	hypothetical protein LOC330577	NM_177894	7	89781470	89797038	2788	+		112	3.28	1.17		26	0.89	0.31		66	3.06	1.09		12	0.54	0.19
1955	Lrfn3	leucine-rich repeat and fibronectin type-III	NM_175478	7	31140533	31147791	2861	+		0	0	0		1	0.03	0.01		21	0.97	0.33		28	1.26	0.44
1956	Arhgef17	rho guanine nucleotide exchange factor 17	NM_001081116	7	108018260	108080675	10250	+		146	4.27	0.41		172	5.94	0.57		232	10.75	1.04		708	31.98	3.12
1957	Zfp780b	zinc finger protein 780B	NM_001081021	7	28744819	28764176	5511	+		79	2.31	0.41		28	0.96	0.17		170	7.88	1.42		248	11.2	2.03
1958	Vmn2r72-ps	vomeronasal 2, receptor 72, pseudogene	NM_001105185	7	92886294	92903491	2571	+		0	0	0		0	0	0		0	0	0		0	0	0
1959	Olfr586	olfactory receptor 586	NM_147111	7	110270343	110271296	954	+		0	0	0		0	0	0		0	0	0		0	0	0
1960	Tmem219	transmembrane protein 219	NM_028389, NM_026827	7	134029733	134041792	962	+		60	1.75	1.81		52	1.79	1.86		485	22.48	23.36		148	6.68	6.94
1961	Ppp5c	serine/threonine-protein phosphatase 5	NM_011155	7	17590002	17613219	2030	+		457	13.38	6.59		471	16.27	8.01		627	29.07	14.32		3736	168.8	83.15
1962	Vmn1r56	vomeronasal 1 receptor 56	NM_030740	7	5146518	5148349	1836	+		0	0	0		0	0	0		0	0	0		0	0	0
1963	Hbb-y	hemoglobin subunit epsilon-Y2	NM_008221	7	111000268	111001721	619	+		0	0	0		0	0	0		0	0	0		2	0.09	0.14
1964	Btbd1	BTB/POZ domain-containing protein 1	NM_146193	7	88936960	88974317	3020	+		378	11.07	3.66		354	12.23	4.04		827	38.34	12.69		635	28.69	9.5
1965	Gltscr1	glioma tumor suppressor candidate region gene 1	NM_001081418	7	16556611	16584844	5360	+		1486	43.52	8.11		1402	48.45	9.03		318	14.74	2.75		377	17.03	3.17
1966	Igsf6	immunoglobulin superfamily member 6 precursor	NM_030691	7	128207581	128218044	2133	+		4	0.11	0.05		1	0.03	0.01		3616	167.65	78.59		15	0.67	0.31
1967	BC051019	hypothetical protein LOC57355	NM_001040700	7	116855695	116867285	2030	+		965	28.26	13.92		804	27.78	13.68		14	0.64	0.31		39	1.76	0.86
1968	Ate1	arginyl-tRNA--protein transferase 1 isoform 4	NM_001136054, NM_013799, NM_001029895	7	137535008	137663475	4727	+		890	26.06	5.51		562	19.42	4.1		789	36.58	7.73		1106	49.97	10.57
1969	Serpinh1	serpin H1 precursor	NM_009825, NM_001111043, NM_001111044	7	106493885	106501749	2400	+		12	0.35	0.14		32	1.1	0.45		615	28.51	11.87		4594	207.56	86.48
1970	Pth	parathyroid hormone	NM_020623	7	120529090	120532087	717	+		0	0	0		0	0	0		0	0	0		0	0	0
1971	Art5	ecto-ADP-ribosyltransferase 5 precursor	NM_007491	7	109245393	109248743	1715	+		0	0	0		3	0.1	0.05		504	23.36	13.62		33	1.49	0.86
1972	Vmn2r58	vomeronasal receptor Vmn2r58	NM_001105055	7	49092251	49128040	2589	+		21	0.61	0.23		24	0.82	0.31		0	0	0		1	0.04	0.01
1973	Sult2a4	sulfotransferase family member-like	NM_001101534	7	14495026	14574937	964	+		184	5.38	5.58		130	4.49	4.65		0	0	0		1	0.04	0.04
1974	Olfr715	olfactory receptor 715	NM_146780	7	114271958	114272905	948	+		0	0	0		0	0	0		0	0	0		0	0	0
1975	C230052I12Rik	Fanconi anemia-associated protein of 24 kDa	NM_178643	7	36177171	36181786	1788	+		1563	45.78	25.6		1227	42.4	23.71		134	6.21	3.47		254	11.47	6.41
1976	Vmn2r69	vomeronasal 2, receptor 69	NM_001105182	7	92554886	92564186	2553	+		1	0.02	0		2	0.06	0.02		0	0	0		0	0	0
1977	Olfr710	olfactory receptor 710	NM_146601	7	114087581	114091826	1156	+		0	0	0		0	0	0		0	0	0		0	0	0
1978	Shkbp1	SH3KBP1-binding protein 1	NM_138676	7	28127152	28141027	2347	+		299	8.75	3.72		395	13.65	5.81		573	26.56	11.31		1576	71.2	30.33
1979	Vmn1r90	vomeronasal 1 receptor 90	NM_001039146	7	15146520	15208415	3922	+		117	3.42	0.87		18	0.62	0.15		49	2.27	0.57		129	5.82	1.48
1980	Olfr611	olfactory receptor 611	NM_146727	7	110665925	110666896	972	+		0	0	0		0	0	0		0	0	0		0	0	0
1981	Ffar1	free fatty acid receptor 1	NM_194057	7	31645587	31646489	903	+		0	0	0		0	0	0		0	0	0		0	0	0
1982	Ascl3	achaete-scute homolog 3	NM_020051	7	116870979	116875246	706	+		0	0	0		0	0	0		0	0	0		0	0	0
1983	Olfr309	olfactory receptor 309	NM_001011866	7	93454695	93455621	927	+		0	0	0		0	0	0		0	0	0		0	0	0
1984	Ryr1	ryanodine receptor 1, skeletal muscle	NM_009109	7	29788359	29910170	15362	+		19	0.55	0.03		17	0.58	0.03		84	3.89	0.25		847	38.26	2.49
1985	Itpripl2	inositol 1,4,5-triphosphate receptor-interacting	NM_001033380	7	125628626	125635489	6891	+		0	0	0		3	0.1	0.01		1300	60.27	8.74		116	5.24	0.76
1986	Rrp8	ribosomal RNA-processing protein 8	NM_025897	7	112880723	112885014	2293	+		2410	70.58	30.78		2429	83.95	36.61		568	26.33	11.48		738	33.34	14.53
1987	Olfr486	olfactory receptor 486	NM_146496	7	115315312	115316256	945	+		0	0	0		0	0	0		0	0	0		0	0	0
1988	Olfr601	olfactory receptor 601	NM_146314	7	110506762	110507706	945	+		0	0	0		0	0	0		0	0	0		0	0	0
1989	Fgfr2	fibroblast growth factor receptor 2 isoform	NM_010207, NM_201601	7	137305965	137410322	5223	+		3304	96.77	18.52		2169	74.96	14.35		1218	56.47	10.81		235	10.61	2.03
1990	Mark4	MAP/microtubule affinity-regulating kinase 4	NM_172279	7	20011424	20043843	2259	+		2034	59.57	26.37		2147	74.2	32.84		384	17.8	7.87		562	25.39	11.23
1991	Cyb5r2	NADH-cytochrome b5 reductase 2	NM_177216	7	114891969	114901510	2688	+		2137	62.59	23.28		1759	60.79	22.61		59	2.73	1.01		45	2.03	0.75
1992	Rccd1	RCC1 domain-containing protein 1	NM_173445	7	87461522	87469310	2292	+		12	0.35	0.15		98	3.38	1.47		85	3.94	1.71		133	6	2.61
1993	Cxcl17	VEGF co-regulated chemokine 1 precursor	NM_153576	7	26185072	26197905	760	+		0	0	0		0	0	0		0	0	0		1	0.04	0.05
1994	Olfr485	olfactory receptor 485	NM_001011810	7	115302432	115303385	954	+		0	0	0		0	0	0		0	0	0		0	0	0
1995	Lmo1	rhombotin-1	NM_057173	7	116282086	116313822	1146	+		3689	108.05	94.28		3380	116.82	101.93		55	2.55	2.22		25	1.12	0.97
1996	Dgat2	diacylglycerol O-acyltransferase 2	NM_026384	7	106302173	106331223	2251	+		1909	55.91	24.83		1824	63.04	28		796	36.9	16.39		88	3.97	1.76
1997	Mrpl46	39S ribosomal protein L46, mitochondrial	NM_023331	7	85920227	85927975	1173	+		843	24.69	21.04		503	17.38	14.81		229	10.61	9.04		1042	47.08	40.13
1998	Olfr487	olfactory receptor 487	NM_001011811	7	115355097	115356041	945	+		0	0	0		0	0	0		0	0	0		0	0	0
1999	Rgs9bp	regulator of G-protein signaling 9-binding	NM_145840	7	36364013	36370601	6604	+		0	0	0		1	0.03	0		0	0	0		124	5.6	0.84
2000	Emp3	epithelial membrane protein 3	NM_001146346, NM_010129	7	53173434	53176774	695	+		1	0.02	0.02		3	0.1	0.14		2316	107.38	154.5		58	2.62	3.76
2001	Cdhr5	cadherin-related family member 5 isoform 1	NM_028069, NM_001114322	7	148454984	148462685	2629	+		1	0.02	0		0	0	0		5	0.23	0.08		2	0.09	0.03
2002	4933402N03Rik	hypothetical protein LOC233918	NM_173409	7	138281861	138289797	1161	+		1	0.02	0.01		0	0	0		150	6.95	5.98		0	0	0
2003	Gpatch1	G patch domain-containing protein 1	NM_026181	7	36061563	36103459	3057	+		2370	69.41	22.7		1576	54.47	17.81		189	8.76	2.86		724	32.71	10.7
2004	Cox6b1	cytochrome c oxidase subunit VIb polypeptide 1	NM_025628	7	31401993	31411170	505	+		1611	47.18	93.42		1138	39.33	77.88		2891	134.04	265.42		3968	179.28	355
2005	BC053749	hypothetical protein LOC333193	NM_183321	7	31324153	31337291	2612	+		139	4.07	1.55		112	3.87	1.48		96	4.45	1.7		223	10.07	3.85
2006	Tsku	tsukushin precursor	NM_001024619, NM_001168540, NM_001168541, NM_001168539	7	105499378	105509798	2313	+		6	0.17	0.07		6	0.2	0.08		168	7.78	3.36		329	14.86	6.42
2007	Olfr642	olfactory receptor 642	NM_146329	7	111197922	111198866	945	+		0	0	0		0	0	0		0	0	0		0	0	0
2008	Abcc6	multidrug resistance-associated protein 6	NM_018795	7	53231750	53285656	4958	+		73	2.13	0.42		145	5.01	1.01		1	0.04	0		7	0.31	0.06
2009	Psg18	pregnancy specific glycoprotein 18 isoform 2	NM_011963, NM_001163685	7	18931193	18940224	1489	+		0	0	0		0	0	0		0	0	0		0	0	0
2010	Aldoa	fructose-bisphosphate aldolase A	NM_007438, NM_001177308, NM_001177307	7	133938750	133942697	1587	+		3144	92.08	58.02		2935	101.44	63.91		20215	937.27	590.59		30307	1369.35	862.85
2011	Blm	Bloom syndrome protein homolog isoform 1	NM_001042527, NM_007550	7	87599977	87679996	4761	+		3769	110.39	23.18		2969	102.61	21.55		111	5.14	1.07		2682	121.18	25.45
2012	Vmn1r71	vomeronasal 1 receptor, E13	NM_145848	7	11332851	11334887	2035	+		0	0	0		0	0	0		0	0	0		0	0	0
2013	Rnh1	ribonuclease inhibitor isoform a	NM_001172101, NM_001172100, NM_145135	7	148346225	148354588	1698	+		116	3.39	1.99		88	3.04	1.79		8666	401.8	236.63		1594	72.02	42.41
[truncated: 18,856 more rows]
