# Supplementary material for: Contribution of Intragenic DNA Methylation in Mouse Gametic DNA Methylomes to Establish Oocyte-Specific Heritable Marks
Source: PLoS Genet. 2012 Jan 5;8(1):e1002440. doi: 10.1371/journal.pgen.1002440 (PMC3252278; doi:10.1371/journal.pgen.1002440)
Supplement: Table S2 — DNA methylation profiles of 23,021 CGIs. (XLSX) [file pgen.1002440.s017.xlsx]

## Sheet: List_of_CGIs_2010
ID	Gene symbol	Chromosome	Start	End	Length (bp)	Strand	CpG observed	CpG obs/exp	GC composition	Average CpG methylation level					Category
										Wild-type oocyte	Dnmt3L-/- oocyte	Sperm	Blastocyst	ESC
CGI1	Xkr4	1	3521604	3522101	297	+	29	0.816525	0.693603	0.141163	0.00145718	0.1875	0.331266	0.807937
CGI2	Xkr4	1	3660434	3662858	2224	+	178	0.728255	0.663219	0.0143405	0.0186916	0.0720448	0.0182038	0.0356108
CGI3	Rp1	1	4342301	4342747	246	+	11	0.503156	0.597561	1	0.166667	0.202381	0.262719	0.867384	Oocyte-methylated
CGI4	Sox17	1	4481601	4483972	2171	+	171	0.756949	0.645325	0.0227926	0.0202203	0.0306781	0.0138841	0.0147059
CGI5		1	4486744	4487898	954	+	53	0.697292	0.56499	0.0195169	0.0189394	0.00892857	0.0189773	0.00438596
CGI6		1	4561480	4562390	710	+	56	0.768057	0.642254	0.000457875	0	0.0206897	0.0138616	0.0753086
CGI7		1	4678110	4678658	348	+	19	0.575013	0.623563	0.0119048	0	0.0821995	0.0221147	0.535995
CGI8	Mrpl15	1	4775361	4776178	617	+	52	0.952604	0.596434	0.0633484	0	0.0213189	0.0290985	0
CGI9	Lypla1	1	4797422	4798475	853	+	98	1.05326	0.661196	0.0142619	0.0390244	0.0318713	0.0304061	0.00308642
CGI10	Tcea1	1	4847389	4848656	1067	+	96	0.890093	0.636364	0.0146403	0.0265152	0.0556736	0.0186203	0.0190476
CGI11	Rgs20	1	5008184	5011312	2928	+	162	0.60657	0.604508	0.0311427	0.02	0.0212818	0.0224077	0.0169161
CGI12		1	5012800	5013239	239	+	15	0.68183	0.631799	0.00399306	0	0.0418561	0.0276724	0
CGI13		1	5013483	5014014	331	+	18	0.643833	0.583082	0.0714286	0.047619	0.0394737	0.0175323	0.0416667
CGI14	Atp6v1h	1	5072902	5073723	621	+	54	0.754856	0.679549	0.00968992		0.0344697	0.00918195	0.0181818
CGI15	Npbwr1	1	5906267	5907697	1230	+	89	0.79301	0.605691	0.054346	0	0.02182	0.0250799	0.0710422
CGI16	Rb1cc1	1	6204111	6205772	1461	+	128	0.850139	0.64271	0.0405861	0.00889016	0.0174052	0.013031	0.00615616
CGI17	Fam150a	1	6349011	6349718	507	+	32	0.605959	0.654832	0.05471		0.00431034	0.00874872	0.132993
CGI18	Fam150a	1	6372747	6373472	525	+	54	0.883102	0.68381	0.0487179	0	0.117647	0.00777001	0.0392157
CGI19		1	6430839	6432065	1026	+	69	0.712306	0.61501	0.91835	0	0.0686224	0.377194	0.128704	Oocyte-methylated, gDMR
CGI20	Pcmtd1	1	7078366	7079624	1058	+	92	0.879632	0.630435	0.0324889	0.00460829	0.0171161	0.0187117	0.0133333
CGI21		1	7387661	7388890	1029	+	75	0.691288	0.652089	0.000683995	0.1	0.0202703	0.0263827	0.0322581
CGI22	Sntg1	1	9288666	9290360	1494	+	91	0.719983	0.585676	0.0288411	0	0.0756239	0.090885	0.0237411
CGI23	Rrs1	1	9535028	9536420	1192	+	102	0.838376	0.639262	0.0220259	0.037037	0.0686869	0.0110196	0.0162402
CGI24		1	9639290	9639649	159	+	8	0.522896	0.622642	0.0666667	0.0113636	0.0178571	0.016417	0.375
CGI25	Mybl1	1	9689645	9691283	1438	+	135	0.847135	0.668289	0.2	0	0.0839925	0.0204607	0.0213415
CGI26	Vcpip1	1	9737434	9738929	1295	+	99	0.877059	0.591506	0.0221842	0	0.0509791	0.0152912	0.0344872
CGI27	Sgk3	1	9787663	9788932	1069	+	134	1.10328	0.674462	0.034868		0.0395865	0.00970407	0.105463
CGI28	Sgk3	1	9838019	9838956	737	+	50	0.726379	0.616011	0.00633528	0	0.0494331	0.0171785	0.0464744
CGI29		1	9933669	9934666	797	+	54	0.844744	0.567127	0.0505952	0.00219298	0.0312042	0.0113842	0.0151515
CGI30		1	9956909	9958604	1495	+	154	0.892744	0.679599	0.084151	0	0.0712632	0.0175975	0.0581395
CGI31	Cops5, Cspp1	1	10027536	10028624	888	+	55	0.828393	0.547297	0.0309068	0.025	0.0599828	0.0193281	0.00709485
CGI32	Cspp1	1	10029502	10030507	805	+	77	0.822723	0.690683	0.0309843	0	0.0329545	0.0228216	0.0208333
CGI33	Arfgef1	1	10221967	10223693	1526	+	178	0.949836	0.70118	0.048048	0.02	0.0299191	0.0185094	0.0199879
CGI34		1	10983244	10984291	847	+	71	0.830456	0.637544	0.0347368	0.0424242	0.0754424	0.0190395	0.0347453
CGI35		1	11319534	11319947	213	+	10	0.567652	0.577465	0.316667		0	0.138337	0.111111
CGI36	A830018L16Rik	1	11403855	11404799	744	+	52	0.732382	0.61828	0.00748251	0.00733377	0.0511905	0.0194209	0.026171
CGI37	Sulf1	1	12826011	12826439	228	+	12	0.719574	0.54386	0	0	0	0.0918042	0.0183983
CGI38	Slco5a1	1	12980076	12983118	2842	+	167	0.712861	0.574595	0.060538	0.0267786	0.100245	0.0207693	0.0534619
CGI39	Prdm14	1	13116268	13116982	514	+	34	0.752992	0.593385	0.0145642	0.0193416	0.0240741	0.0165776	0.0322344
CGI40		1	13118452	13118903	251	+	15	0.861258	0.533865	0.0313274	0	0.0280702	0.033716	0.0772727
CGI41	Ncoa2	1	13362193	13365073	2680	+	264	0.793745	0.706343	0.049223	0	0.032473	0.0169874	0.00680272
CGI42		1	13521662	13522023	161	+	9	0.72396	0.565217	0	0.0178571	0.0462361	0.00971178	0.0837151
CGI43	Tram1	1	13579064	13580509	1245	+	128	0.93281	0.664257	0.00485831	0.0318891	0.0222934	0.0202686	0.0115354
CGI44	Lactb2	1	13650045	13650955	710	+	55	0.758953	0.639437	0.00892857	0.0576923	0.00892857	0.00919052	0
CGI45	Eya1	1	14299648	14300341	493	+	41	0.859681	0.622718	0	0	0.0832787	0.026723	0.0272109
CGI46		1	14496382	14497431	849	+	57	0.659723	0.639576	0.0346667	0.0666667	0.0395349	0.0330562	0.0136364
CGI47	Msc	1	14744996	14746430	1234	+	87	0.686989	0.641005	0.0266501	0.0204082	0.0349206	0.00756359	0.0346535
CGI48	Trpa1	1	14908570	14909103	333	+	17	0.649663	0.573574	0.108142	0	0.0277778	0.0382388	0
CGI49		1	15276271	15277747	1276	+	95	0.691345	0.659875	0.0376669	0.0364823	0.0243697	0.0421311	0.0305128
CGI50	Kcnb2	1	15641096	15641558	262	+	15	0.815769	0.534351	0.120427	0	0.0526316	0.0666667	0.777778
CGI51	Terf1	1	15795457	15796552	895	+	70	0.832604	0.613408	0.0279518	0.5	0.0405983	0.0255168	0.004329
CGI52	Gm106	1	15882285	15883222	737	+	53	0.603445	0.693351	1	0.0666667	0.05	0.286877	0.0128205	Oocyte-methylated, gDMR
CGI53		1	16082790	16083675	685	+	51	0.644524	0.681752	0.991071	0.0210101	0.0169904	0.100716	0.10463	Oocyte-methylated, gDMR
CGI54	Rdh10, Rpl7	1	16094082	16096704	2422	+	219	0.888699	0.639554	0.0316095	0.0120888	0.063068	0.0177409	0.0203672
CGI55	Stau2	1	16508514	16510373	1659	+	155	0.887456	0.68053	0.0148581	0.0154799	0.0462849	0.0387818	0.0146732
CGI56	Ube2w	1	16608452	16609761	1109	+	123	0.930485	0.691614	0.0316667	0	0.0157213	0.0151122	0.0242769
CGI57	Tceb1	1	16646428	16647410	782	+	46	0.704083	0.584399	0.0440698	0	0.0153199	0.0165482	0
CGI58	Tmem70	1	16654977	16655871	694	+	60	0.863982	0.636888	0.0205875	0.0286839	0.0365036	0.0129311	0.146903
CGI59	Jph1	1	17081527	17082270	543	+	36	0.769874	0.587477	1	0.0416667	0.397494	0.600145	0.435707	Oocyte-methylated
CGI60	Jph1	1	17086634	17088375	1541	+	139	0.803878	0.675535	0.0697436	0	0.0707483	0.0534018	0.026936
CGI61	Gdap1	1	17135323	17135980	457	+	26	0.641045	0.597374	0	0	0.0454545	0.0176842	0.0516667
CGI62		1	18047709	18049242	1333	+	104	0.847606	0.609152	0.0307143	0	0.0536585	0.0134626	0.015873
CGI63		1	19086925	19087349	224	+	13	0.62756	0.616071	0.00561167		0.0469136	0.0232153	0.107143
CGI64	Tcfap2d	1	19094072	19095096	824	+	46	0.653275	0.603155	0.0155039	0.0625	0.0240255	0.0210853	0.037631
CGI65	Tcfap2b	1	19199662	19200616	754	+	50	0.834256	0.571618	0.0241083	0	0.026198	0.0189298	0.0117807
CGI66	Tcfap2b	1	19203858	19204655	597	+	39	0.753297	0.61809	0.0694444		0.0476853	0.0251033	0.0724285
CGI67	Tcfap2b	1	19224044	19224511	267	+	17	0.744455	0.588015	0.475658	0.0342105	0.00793651	0.0709973	0.0111522
CGI68	Tcfap2b	1	19226511	19227078	367	+	24	0.752947	0.591281	0	0	0.108333	0.0207554	0.0430108
CGI69	Mcm3	1	20809855	20810591	536	+	49	0.903609	0.649254	0.0329061	0.0413793	0.0233937	0.0104999	0.0888889
CGI70	Paqr8	1	20880383	20881572	989	+	58	0.655188	0.622851	0.0191257	0.0177083	0.0267842	0.0126017	0.0132074
CGI71	Paqr8	1	20924569	20925771	1002	+	52	0.604547	0.592814	0.183737	0.0138889	0.134251	0.0682044	0.397742
CGI72	Efhc1	1	20941509	20942236	527	+	31	0.612967	0.637571	0.0436333	0	0.0211715	0.0214286	0.0419064
CGI73	Tram2	1	21068715	21070057	1142	+	89	0.717105	0.664623	0.0204918	0	0.114532	0.0149166	0.0357143
CGI74		1	21156376	21156824	248	+	14	0.689489	0.576613	0.0611111	0	0	0.00925926	0.0486111
CGI75	Tmem14a	1	21208646	21209147	301	+	11	0.490265	0.548173	0.01		0	0.0080523	0
CGI76	Kcnq5	1	21950547	21952572	1825	+	154	0.777967	0.659178	0.0932435		0.0636986	0.0325925	0.0488611
CGI77		1	22020391	22020769	178	+	10	0.702534	0.567416	0.2	0.0666667	0.0266667	0.208828	0.83
CGI78	Rims1	1	22539795	22541193	1198	+	123	0.916206	0.672788	0.158261	0.0112279	0.0281311	0.0690572	0.0148175
CGI79	Rims1	1	22811989	22813535	1346	+	89	0.601874	0.665676	0	0.05	0.0215286	0.0143222	0.149862
CGI80	4933415F23Rik	1	23108465	23109187	522	+	30	0.674841	0.584291	0.0434783	0	0.033189	0.0459107	0.939951
CGI81		1	23262614	23264045	1231	+	132	0.954888	0.672624	0.0374396	0	0.0804276	0.00664353	0.0181818
CGI82	Ogfrl1	1	23389135	23390528	1193	+	114	0.799883	0.694887	0.0396927	0	0.0206703	0.0470692	0.0954545
CGI83	B3gat2	1	23768392	23770508	1916	+	148	0.734631	0.650835	0.00846787	0.0218916	0.019655	0.0202951	0.0158015
CGI84	Smap1	1	23928316	23929519	1003	+	117	0.933917	0.708873	0.0380117	0	0.0151515	0.0193099	0.0694444
CGI85	1110058L19Rik	1	24012003	24012808	605	+	46	0.917912	0.578512	0.0269779	0	0.00848506	0.019426	0.0182648
CGI86		1	24106173	24107716	1343	+	135	0.884448	0.674609	0.0244313	0.0243902	0.0494384	0.0221272	0.0266687
CGI87		1	24140552	24141089	337	+	18	0.584668	0.614243	0.0125	0.000757576	0.0325	0.0275631	0.256367
CGI88	Col19a1	1	24460158	24460740	382	+	25	0.930341	0.541885	0.278788	0	0.283094	0.15997	0.777778
CGI89	Col19a1	1	24593028	24594505	1277	+	96	0.807918	0.612373	0.0262315	0.0277778	0.0268845	0.0233528	0.071447
CGI90		1	24601936	24602473	337	+	17	0.598859	0.581602	0.00954545	0.00919118	0	0.00954545	1
CGI91		1	24618280	24618932	452	+	8	0.606023	0.369469	0.12082	0.0479399	0.44333	0.0833333	0.75
CGI92		1	24618990	24622290	3100	+	53	0.588101	0.365806	0.0324432	0.040027	0.420144	0.0117916	0.103333
CGI93		1	24622507	24623083	376	+	6	0.433336	0.393617	0.0476113	0.0404932	0.592857	0.1875	0.153846
CGI94	Lmbrd1	1	24685008	24686237	1029	+	74	0.783029	0.606414	0.0457379	0.04	0.103868	0.012223	0.0195578
CGI95	Bai3	1	25285324	25285896	372	+	21	0.909446	0.5	0.574748	0	0.012932	0.152363	0.0432326
CGI96	Bai3	1	25886424	25887858	1234	+	113	0.88918	0.647488	0.0126829	0.0263158	0.0117055	0.0164327	0.0212766
CGI97		1	29793848	29794280	232	+	20	0.956504	0.612069	0.0625	0	0	0.0047619	1
CGI98		1	30826439	30826814	175	+	10	0.771955	0.56	0.0465587	0.00438596	0.0528415	0.00627886	0.798611
CGI99		1	30929541	30931217	1476	+	167	0.971045	0.683604	0.0107585	0.00314465	0.00833188	0.014606	0.0376615
CGI100	Ptp4a1	1	31005533	31007180	1447	+	168	1.03671	0.670352	0.0318195	0.0416667	0.0336563	0.023349	0.00387597
CGI101	Khdrbs2	1	32229106	32230135	829	+	55	0.645212	0.641737	0.0191489	0.0128205	0.00529101	0.0150172	0.0126582
CGI102	Prim2	1	33694702	33695201	299	+	15	0.731002	0.561873	0.998005	0.0631579	0.0201712	0.159393	0.127095	Oocyte-methylated, gDMR
CGI103	Prim2	1	33726229	33727582	1153	+	80	0.799973	0.589766	0.0326092	0.0343882	0.0493558	0.0159098	0.0368421
CGI104	Rab23	1	33776419	33777777	1158	+	101	0.948723	0.608808	0.0518797	0.0263158	0.0274514	0.068633	0.0679364
CGI105	Rab23	1	33796136	33796509	173	+	8	0.631314	0.543353	0.909091	0.00833333	0.966667	0.183728	0.363636	Oocyte and sperm-methylated
CGI106	Bag2	1	33813882	33815088	1006	+	76	0.738242	0.640159	0.0344828		0.276182	0.025381	0.0547264
CGI107	Zfp451	1	33870676	33871772	896	+	83	0.81314	0.677455	0.0123718	0.0140845	0.0453579	0.018344	0
CGI108	Bend6	1	33940260	33940671	211	+	11	0.743639	0.530806	0	0.010101	0.0491868	0.0165598	0.00727969
CGI109	Bend6	1	33963641	33965718	1877	+	171	0.889813	0.642515	0.195358	0	0.0201522	0.0370247	0.03408
CGI110		1	34001880	34002247	167	+	8	0.565677	0.586826	1		0.0621212	0.19657	0.0337302	Oocyte-methylated, gDMR
CGI111		1	34062658	34063246	388	+	22	0.800192	0.536082	0.872951	0.00769231	0.304625	0.399299	0.0362209	Oocyte-methylated
CGI112	Dst	1	34067663	34069124	1261	+	84	0.636961	0.647105	0.900976	0.0180723	0.041707	0.167044	0.0576212	Oocyte-methylated, gDMR
CGI113	Dst	1	34234697	34235288	391	+	31	0.872994	0.616368	1		0.300683	0.206666	0.14242	Oocyte-methylated
CGI114	Dst	1	34292857	34293738	681	+	34	0.519422	0.621145	0.956522		0.20022	0.230925	0.113158	Oocyte-methylated
CGI115		1	34489593	34490251	458	+	30	0.744851	0.593886	0.269984	0	0.0741217	0.0799603	0.019697
CGI116		1	34491634	34492172	338	+	19	0.769173	0.547337	0.037037	0	0.0213333	0.046599	0.0666667
CGI117	Ccdc115, Imp4	1	34495873	34497310	1237	+	71	0.713458	0.567502	0.0348079	0	0.0483987	0.0230673	0.0277778
CGI118	Ptpn18	1	34516129	34517213	884	+	59	0.694645	0.621041	0.0287793	0.0292796	0.0393858	0.0196568	0.050263
CGI119	Ptpn18	1	34529310	34530325	815	+	45	0.56326	0.629448	1	0.0138889	0	0.209276	0.0265957	Oocyte-methylated, gDMR
CGI120		1	34542317	34542992	475	+	21	0.630625	0.530526	0.0306905	0	0.0677148	0.00981108	0.167204
CGI121	Prss40	1	34617512	34617956	244	+	14	0.624328	0.610656	0.0527005	0.0222222	0.0666667	0.0170121	0.727273
CGI122	Fam123c	1	34635878	34637161	1083	+	64	0.662618	0.599261	0.00631725	0.0327593	0.0132075	0.0186108	0.0327273
CGI123		1	34734551	34735738	987	+	61	0.705451	0.605876	0.0388386	0.0182529	0.012369	0.0176913	0.0475904
CGI124		1	34780491	34780930	239	+	12	0.634932	0.577406	0.0368421	0	0.146051	0.0124951	0.614719
CGI125		1	34806909	34808340	1231	+	114	0.773393	0.693745	0.022523	0	0.0570736	0.0238143	0.0383862
CGI126	Arhgef4	1	34858378	34859249	671	+	47	0.62929	0.669151	0.0284553	0	0.152381	0.0260307	0.0222222
CGI127	Arhgef4	1	34862702	34863452	550	+	33	0.687684	0.6	0.9995	0.037037	0.0107527	0.171303	0.20389	Oocyte-methylated, gDMR
CGI128	Fam168b	1	34899174	34900434	1060	+	111	1.01818	0.645283	0.0588476	0	0.13174	0.0305627	0.0219298
CGI129	Plekhb2	1	34906513	34907206	493	+	39	0.77052	0.651116	0.037037	0	0.0113155	0.00831028	0.00454279
CGI130		1	34986283	34987619	1136	+	68	0.63297	0.615317	0.10813	0	0.16713	0.0344214	0.376327
CGI131		1	35272977	35273349	172	+	8	0.655325	0.563953	0	0	0.143773	0.0377702	0.955556
CGI132		1	36087367	36087873	306	+	16	0.630559	0.578431	0.00138504	0.000974659	0.094958	0.0369774	0.185624
CGI133	Hs6st1	1	36124556	36126572	1816	+	173	0.848067	0.670705	0.034436	0.0930233	0.0367208	0.0106834	0.0498369
CGI134	Hs6st1	1	36160201	36161240	839	+	49	0.685727	0.584029	0.956703	0.004	0.155264	0.303777	0.344264	Oocyte-methylated, gDMR
CGI135	Uggt1	1	36300555	36301468	713	+	58	0.791455	0.645161	0.0141982		0.0400741	0.0173274	0
CGI136		1	36311610	36311994	184	+	10	0.684445	0.565217	0.100295	0	0	0.0219711	0.0625
CGI137	Neurl3	1	36325456	36326821	1165	+	73	0.761751	0.576824	0.045031	0.0191257	0.0746753	0.0156436	0.159412
CGI138		1	36360061	36360547	286	+	22	0.791238	0.632867	0.0617284	0	0.09375	0.0472344	0
CGI139	Arid5a	1	36364316	36365514	998	+	73	0.799744	0.60521	0.0687134	0.025585	0.0245917	0.018333	0.0220808
CGI140	4632411B12Rik	1	36425259	36426547	1088	+	104	0.847313	0.674632	0.0185185	0.230769	0.109433	0.0211981	0.029703
CGI141		1	36465229	36465869	440	+	24	0.579948	0.615909	0.239583	0	0.04	0.0632781	0.814074
CGI142	Lman2l	1	36501461	36502397	736	+	52	0.747058	0.631793	0.0279222	0.0588235	0.0626821	0.029787	0.0275298
CGI143	Cnnm4	1	36527818	36529439	1421	+	120	0.79804	0.654469	0.203973	0.0225694	0.110545	0.0297321	0.134349
CGI144	Cnnm3	1	36568144	36570158	1814	+	198	0.892311	0.70011	0.0468301	0	0.0555954	0.0279497	0.0244141
CGI145	Ankrd39	1	36598543	36599077	334	+	16	0.535469	0.601796	1	0.0588235	0.913139	0.342564	0.947483	Oocyte and sperm-methylated
CGI146	Ankrd39	1	36603513	36604588	875	+	53	0.644834	0.617143	0	0.030303	0.0430556	0.0142384	0.0217391
CGI147	Sema4c	1	36609432	36609993	361	+	18	0.550482	0.614958	0.9375	0	0.927083	0.243569	0.716122	Oocyte and sperm-methylated
CGI148	Sema4c	1	36613344	36615871	2327	+	164	0.66734	0.650193	0.907109	0	0.0197411	0.175251	0.0145197	Oocyte-methylated, gDMR
CGI149	Fam178b	1	36739540	36740418	678	+	46	0.715639	0.616519	0.048925	0.0718109	0.132275	0.0129655	0.156351
CGI150	LOC100040340, Cox5b	1	36747900	36749157	1057	+	77	0.824939	0.59508	0.0212264	0	0.0487963	0.0212793	0
CGI151	Actr1b	1	36766259	36767168	709	+	53	0.723892	0.643159	0.998792	0.0531469	0.027193	0.0870991	0.0211412	Oocyte-methylated, gDMR
CGI152		1	36803342	36803730	188	+	8	0.559394	0.553191	1	0	0.102381	0.113558	0.2	Oocyte-methylated, gDMR
CGI153		1	36815797	36816300	303	+	16	0.755288	0.534653	0.999479	0.00649351	0.0387205	0.21357	0.230791	Oocyte-methylated, gDMR
CGI154	Zap70	1	36827463	36828359	696	+	49	0.70741	0.632184	1	0.0181818	0.0128205	0.143206	0.0825563	Oocyte-methylated, gDMR
CGI155	Zap70	1	36835836	36836245	209	+	14	0.831938	0.569378	0.999234	0	0.558099	0.368324	0.290294	Oocyte-methylated
CGI156		1	36841774	36842664	690	+	30	0.620864	0.530435	0.964762	0	0.0418669	0.2157	0.0417874	Oocyte-methylated, gDMR
CGI157	Tmem131	1	36995567	36997274	1507	+	171	0.977117	0.68215	0.00998611	0.0186882	0.012418	0.0150259	0.0233102
CGI158		1	37085725	37086520	595	+	29	0.612475	0.564706	0.00755167	0.0344828	0.0296201	0.0205702	0.084145
CGI159		1	37275339	37275800	261	+	8	0.432617	0.544061	0	0	0.405882	0.107023	0.409429
CGI160	Cnga3	1	37318023	37318432	209	+	12	0.787518	0.545455	0.0916667	0.075	0.249254	0.0373251	0.681781
CGI161	Inpp4a	1	37356388	37357531	943	+	78	0.84151	0.636267	0.00478142	0.0352941	0.0140625	0.0256791	0.0906863
CGI162	Unc50, 6330578E17Rik	1	37486313	37487778	1265	+	94	0.809882	0.606324	0.0394737	0.0214608	0.0454888	0.0170712	0.00490196
CGI163		1	37597032	37598472	1240	+	113	0.795784	0.68629	0.025641		0.0391274	0.0375463	0.0499008
CGI164	2010300C02Rik	1	37670975	37671386	211	+	9	0.495596	0.601896	0.519616	0	0.015625	0.0500524	0.648485
CGI165	2010300C02Rik	1	37743860	37744483	423	+	18	0.575829	0.555556	0	0.00529101	0.995652	0.0657725	0.739317	Sperm-methylated, gDMR
CGI166	2010300C02Rik	1	37775849	37777229	1180	+	118	0.859106	0.683051	0.0352231	0	0.0166667	0.0133481	0.03125
CGI167	Tsga10	1	37921225	37922573	1148	+	98	0.774089	0.675087	0.0194206	0.0833333	0.0333333	0.0138246	0.0128205
CGI168	Lipt1	1	37929016	37929566	350	+	21	0.948656	0.511429	0	0	0.00935065	0.013304	0.0138889
CGI169	Lipt1	1	37932004	37932787	583	+	33	0.834469	0.521441	0.998932	0.138889	0.0587488	0.288543	0.782437	Oocyte-methylated, gDMR
CGI170	Mrpl30, Mitd1	1	37946831	37947732	701	+	50	0.925513	0.556348	0.0324448	0.0180556	0.0353933	0.0403046	0.0692308
CGI171	Txndc9	1	38053590	38054443	653	+	44	0.782724	0.588055	0.0304348	0.068211	0.0198413	0.0119601	0.0392857
CGI172	Eif5b	1	38054554	38055672	918	+	102	0.928909	0.700436	0.0280542	0.00163802	0.0471429	0.0191894	0.0357494
CGI173	Rev1	1	38185595	38187488	1693	+	204	1.00899	0.692262	0.0287328	0	0.0611242	0.00941324	0.0180879
CGI174	Aff3	1	38266700	38267471	571	+	37	0.629097	0.642732	1	0	0.116111	0.277977	0.251997	Oocyte-methylated, gDMR
CGI175	Aff3	1	38274931	38275394	263	+	17	0.572457	0.676806	0.272727	0.0714286	0.171769	0.125691	0.259921
CGI176	Aff3	1	38296299	38296737	238	+	11	0.678289	0.533613	0.0790404	0.00383142	0.0816327	0.017619	0.722222
CGI177	Aff3	1	38415599	38416377	578	+	26	0.542136	0.577855	0.00774614	0.000392157	0.0312169	0.022461	0.880589
CGI178	Aff3	1	38683193	38685249	1856	+	189	0.830588	0.702047	0.00204918	0.047619	0.0501134	0.028734	0.0375298
CGI179		1	38892321	38894105	1584	+	153	0.914768	0.651515	0.0371637	0.0295181	0.0977731	0.0507831	0.0550377
CGI180	Chst10	1	38954141	38955304	963	+	72	0.780568	0.62513	0.0264363	0.034741	0.0403439	0.0625317	0.0554348
CGI181	Nms	1	39002790	39003185	195	+	12	0.83053	0.548718	0.0374269	0.0298246	0.0337321	0.0204437	0.775641
CGI182	Pdcl3	1	39044169	39045021	652	+	49	0.723588	0.645706	0.0384615	0	0.00396825	0.0343385	0.00793651
CGI183	Npas2	1	39249204	39251641	2237	+	171	0.702988	0.659812	0.0329254	0.030303	0.020327	0.0346087	0.0443345
CGI184	Npas2	1	39418702	39419072	170	+	10	0.684024	0.588235	1		0	0.206881	0.161905	Oocyte-methylated, gDMR
CGI185	Rpl31	1	39424056	39425739	1483	+	108	0.911548	0.566419	0.0164112	0.0769231	0.0743321	0.0143223	0.0209288
CGI186	Tbc1d8	1	39534540	39535984	1244	+	109	0.835494	0.651125	0.0268744	0.0246914	0.0704	0.0106656	0.017316
CGI187	D1Bwg0212e	1	39592045	39593377	1132	+	116	0.92471	0.666078	0.0166638	0	0.0673489	0.0121773	0.0518692
CGI188	Rnf149	1	39633141	39634784	1443	+	143	0.944685	0.648649	0.0211426	0.0490196	0.0374781	0.0247176	0.0129699
CGI189	Creg2	1	39706873	39708355	1282	+	87	0.696652	0.625585	0.0229012		0.0841667	0.0109247	0.0439149
CGI190	Rfx8	1	39777343	39778128	585	+	39	0.597539	0.670085	1		0.016358	0.156142	0.284722	Oocyte-methylated, gDMR
CGI191	Map4k4	1	39956855	39958997	1942	+	189	0.899379	0.658084	0.0344119	0	0.0418487	0.0203377	0.0202981
CGI192	Map4k4	1	39992500	39992928	228	+	5	0.36007	0.495614	0	0	0.135185	0.145632	0
CGI193	Map4k4	1	39993002	39993739	537	+	19	0.503425	0.532588	0.0267857		0.0634921	0.0229834	0
CGI194	Il1r2	1	40142506	40143009	303	+	15	0.683256	0.544554	0.0715059	0	0.0202948	0.0143696	0.0608098
CGI195	Il1r1	1	40323149	40323882	533	+	35	0.611566	0.65666	0.933333	0.00641026	0.01	0.2416	0	Oocyte-methylated, gDMR
CGI196	Il1rl2	1	40382254	40383128	674	+	34	0.63307	0.568249	0.0714286		0.0419763	0.0383655	0.0697674
CGI197	Slc9a2	1	40737370	40739323	1753	+	146	0.770688	0.65773	0.299104	0.0265152	0.0351691	0.0694429	0.0623898
CGI198	Slc9a2	1	40824511	40824890	179	+	10	0.564281	0.631285	0	0	0.0294118	0.0565272	0.786555
CGI199	Mfsd9	1	40847180	40847946	566	+	34	0.656386	0.606007	0.0125313	0.0315789	0.0214286	0.0122146	0.0721966
CGI200		1	42318701	42319111	210	+	8	0.46197	0.57619	0.0563164	0.05	0.0290404	0.0337452	0.313158
CGI201		1	42472817	42473210	193	+	11	0.729842	0.57513	1		0.0507812	0.201444	0.619544	Oocyte-methylated, gDMR
CGI202		1	42548311	42549019	508	+	35	0.791781	0.590551	1	0	0.0878378	0.165782	0.0324074	Oocyte-methylated, gDMR
CGI203		1	42740998	42742085	887	+	53	0.615434	0.624577	0.065878		0.0728697	0.0121774	0.075618
CGI204		1	42742921	42743950	829	+	51	0.695349	0.597105	0.0294118		0.00772311	0.0120034	0.0607345
CGI205		1	42750670	42752231	1361	+	91	0.802609	0.577517	0.0416667	0	0.0117597	0.0199038	0.0333333
CGI206	Pou3f3	1	42752263	42756153	3690	+	348	0.872771	0.657724	0.0468274	0.0190293	0.0303098	0.0280856	0.0285621
CGI207		1	42769941	42770779	638	+	39	0.702358	0.600313	0.10125	0	0.0633333	0.0298385	0.0396259
CGI208		1	42771131	42771527	196	+	13	0.579952	0.678571	0.0526316	0	0.0285714	0.00595238	0.01
CGI209		1	42837245	42837612	167	+	10	0.909124	0.51497	0.588515		0.382353	0.097844	0.687925
CGI210	Mrps9	1	42907715	42908837	922	+	48	0.606938	0.593275	0.0222688	0.0215439	0.0416667	0.00822239	0.0183264
CGI211	Gpr45	1	43009484	43010729	1045	+	85	0.681042	0.691866	0.0391134	0.028138	0.0113636	0.0298303	0.0594203
CGI212	Gpr45	1	43089015	43090056	841	+	40	0.595633	0.568371	0.00682449	0	0.0543101	0.0184642	0.64846
CGI213	Tgfbrap1	1	43148401	43149943	1342	+	109	0.790239	0.652012	0.00171233	0.0376344	0.0734471	0.028004	0.0808642
CGI214	Tgfbrap1, AI597479	1	43155093	43156004	711	+	53	0.713401	0.646976	0.00822511	0.0192308	0.0397158	0.0157969	0.0233273
CGI215	Fhl2	1	43180217	43180926	509	+	24	0.691919	0.524558	0.0444164	0	0.0641681	0.0259709	0.380891
CGI216	Fhl2	1	43220225	43221350	925	+	61	0.670211	0.629189	0		0.0665085	0.0226215	0.0858347
CGI217	Nck2	1	43501955	43503756	1601	+	142	0.818966	0.662711	0.00824176	0.0568182	0.0248366	0.0142981	0.0401786
CGI218	Nck2	1	43610730	43611198	268	+	16	0.658919	0.608209	0.9875	0.0666667	0.119792	0.32282	0.5	Oocyte-methylated, gDMR
CGI219	1500015O10Rik	1	43787419	43787854	235	+	11	0.473904	0.634043	0.133333		0.107143	0.0109138	0.375
CGI220	Uxs1	1	43883728	43885197	1269	+	111	0.839888	0.646178	0.0163646	0.0230769	0.0888701	0.0218475	0.0181518
CGI221		1	43954808	43955268	260	+	16	0.677712	0.603846	0.121704	0.0412734	0.12619	0.0228488	0.318662
CGI222	Tpp2	1	43990260	43991598	1138	+	93	0.829525	0.628295	0.00668213	0.0201072	0.102537	0.0275214	0.018797
CGI223	1700029F09Rik	1	44158389	44159711	1122	+	109	1.07512	0.605169	0.0136718	0.0429487	0.0360508	0.0139242	0.00462963
CGI224	Kdelc1	1	44175121	44175884	563	+	28	0.672288	0.545293	0.00634921	0	0.0160317	0.130596	0.0166667
CGI225	Bivm	1	44175939	44177058	919	+	45	0.526263	0.610446	0.147259	0	0.0666667	0.176444	0.00403708
CGI226	Ercc5	1	44204191	44205242	851	+	66	0.850416	0.606345	0.0179848	0.0757167	0.0402371	0.0215079	0.0590909
CGI227		1	44255391	44256133	542	+	42	0.854096	0.603321	0.077125	0	0.0709402	0.00763332	0.137657
CGI228	Gulp1	1	44608305	44609476	971	+	63	0.630935	0.643666	0.0179894	0.0140476	0.00775194	0.0951848	0.0288889
CGI229	Wdr75	1	45851883	45852884	801	+	64	0.893051	0.604245	0.0218703		0.0487129	0.0106411	0.0190476
CGI230	Slc40a1	1	45982026	45983091	865	+	52	0.703571	0.584971	0.0658657	0.03125	0.0316327	0.0269593	0.0978175
CGI231	Dnahc7b	1	46123471	46124093	422	+	24	0.691086	0.575829	0	0	0.0829861	0.0339153	0.0454545
CGI232	Dnahc7b	1	46145483	46146354	671	+	66	0.97778	0.724292	0.32381		0.0151515	0.0238095	0.353175
CGI233		1	46482195	46482692	297	+	21	0.724901	0.626263	0.00083612	0	0.0227273	0.0185214	0.0565217
CGI234	Slc39a10	1	46909320	46911149	1629	+	176	0.984705	0.666053	0.0147059	0.0149254	0.0656504	0.0197695	0
CGI235	Tmeff2	1	50983329	50985135	1606	+	97	0.63762	0.620797	0.0178744	0.011583	0.0363159	0.0213969	0.0253455
CGI236	Sdpr	1	51346267	51346864	397	+	19	0.584936	0.576826	0.01	0	0.0175439	0.0689132	0.775
CGI237		1	51483338	51483733	195	+	11	0.797358	0.533333	0.02265	0.0660173	0.0567079	0.0376903	0.888889
CGI238	Obfc2a	1	51534493	51535857	1164	+	82	0.805142	0.591924	0.115321	0.037037	0.0271101	0.0100475	0.0357036
CGI239	Myo1b	1	51971727	51973467	1540	+	118	0.751453	0.640909	0.0309902	0	0.041687	0.015036	0.0580169
CGI240		1	52170264	52170961	497	+	36	0.70778	0.641851	0	0	0.0630631	0.00667183	0
CGI241	Stat1	1	52175972	52177007	835	+	56	0.744057	0.601198	0.00302274	0.0222222	0.0283661	0.0166257	0.0183409
CGI242	Gls	1	52288676	52290659	1783	+	172	0.825775	0.684801	0.0159171	0	0.0165706	0.0164531	0.0217002
CGI243	Nab1	1	52556432	52557974	1342	+	146	0.893034	0.701192	0	0.00238095	0.0152788	0.0228598	0
CGI244		1	52654618	52655119	301	+	11	0.525057	0.55814	0.0582418	0.038961	0.0309183	0.00769231	0.0461525
CGI245	Tmem194b	1	52687234	52688028	594	+	47	0.758684	0.646465	0.0122329	0.0193818	0.0128205	0.0211187	0.00813008
CGI246	Mfsd6	1	52783103	52784671	1368	+	117	0.760784	0.671053	0.0245181	0.0515873	0.0210395	0.0160063	0.0493308
CGI247	Inpp1	1	52873794	52874882	888	+	62	0.689148	0.63964	0.0246159	0	0.0261972	0.0289906	0.0504342
CGI248	Hibch	1	52901537	52902336	599	+	38	0.665268	0.621035	0.0765736	0	0.0127735	0.0120205	0.0220148
CGI249	1700019D03Rik	1	53009285	53010374	889	+	48	0.541034	0.640045	0.988525	0.0588235	0.0349475	0.140828	0.0196078	Oocyte-methylated, gDMR
CGI250	Pms1, Ormdl1	1	53353364	53354389	825	+	67	0.812516	0.632727	0.00658954	0.00277172	0.0310284	0.0283833	0.0666667
CGI251	Asnsd1	1	53409113	53409844	531	+	43	0.81543	0.630885	0	0.027027	0.0634921	0.0124593	0
CGI252		1	53763189	53763885	496	+	32	0.70713	0.604839	0.00533587	0.0636364	0	0.0163975	0.02
CGI253	Stk17b	1	53841141	53842340	999	+	93	0.924234	0.635636	0.0128205	0	0.0298319	0.0322168	0.019774
CGI254	Hecw2	1	54250839	54252359	1320	+	151	0.99959	0.677273	0.0196024	0.0407587	0.0423146	0.0101244	0.0229825
CGI255	Ccdc150	1	54307243	54307771	328	+	20	0.699634	0.591463	0.00295858	0	0.00307692	0.00980942	0.04
CGI256	Gtf3c3	1	54495495	54496087	392	+	29	0.813612	0.609694	0		0.0291859	0.0159632	0.0267974
CGI257	Pgap1	1	54613918	54615056	938	+	62	0.699896	0.628998	0.0553788	0.02	0.0427725	0.0170746	0.027044
CGI258	Ankrd44	1	54982241	54983791	1350	+	133	0.866623	0.682963	0.0169308	0	0.0263158	0.0196324	0.0216014
CGI259	Sf3b1	1	55083564	55084689	925	+	94	0.991368	0.641081	0.0223377	0	0.0600877	0.0151011	0.0121333
CGI260	Coq10b	1	55109028	55110394	1166	+	102	0.866585	0.638079	0.0313762	0.666667	0.102564	0.0214051	0
CGI261	Hspe1, Hspd1	1	55143811	55145684	1673	+	153	0.83792	0.662881	0.0812726	0.0161989	0.0342714	0.0215077	0.0179884
CGI262	Mobkl3	1	55187718	55188899	981	+	91	0.787193	0.687054	0.0119048	0	0.00201144	0.0197007	0.00862101
CGI263	Mars2	1	55293655	55295311	1456	+	114	0.869014	0.600962	0.038225	0.0357143	0.0173611	0.0212758	0
CGI264	Boll	1	55419055	55420932	1677	+	171	0.867868	0.685748	0.0262128	0.376812	0.0349563	0.0317786	0.127193
CGI265		1	55438517	55439090	373	+	18	0.590531	0.573727	0.0430839	0.01332	0.0238095	0.0181897	0.533333
CGI266	Plcl1	1	55462185	55463938	1553	+	129	0.794706	0.648422	0.00515464	0.016132	0.0375966	0.0298822	0.0375104
CGI267	Satb2	1	57026249	57026945	496	+	35	0.716672	0.629032	0.515935	0.0603735	0.0178571	0.114016	0.016351
CGI268	Satb2	1	57027573	57028161	388	+	24	0.72367	0.592784	0.472222	0.00375628	0.026936	0.101479	0.0593197
CGI269		1	57028206	57030645	2239	+	189	0.806917	0.647611	0.0244922	0.0203019	0.032088	0.0214377	0.0210376
CGI270		1	57033379	57034964	1385	+	69	0.640867	0.558123	0.0628716	0.00208333	0.0853203	0.0107829	0.042517
CGI271		1	57041073	57041684	411	+	22	0.651715	0.574209	0.000415455	0	0	0.0342786	0.161797
CGI272	1700066M21Rik	1	57434110	57435210	900	+	80	0.812426	0.663333	0.030303	0.0124533	0.0880053	0.0402633	0.0117541
CGI273	1110034B05Rik, 9430016H08Rik	1	57462850	57464243	1193	+	85	0.772516	0.609388	0.0116995	0.0113636	0.0439966	0.0337581	0.0488397
CGI274	Spats2l	1	57830930	57832716	1586	+	146	0.851477	0.662673	0.0063268	0.02	0.065402	0.0152137	0.0144928
CGI275	Kctd18	1	58026150	58027305	955	+	66	0.720406	0.62199	0.0351852	0	0.00648148	0.0211805	0.0407407
CGI276	Sgol2	1	58052468	58053354	686	+	53	0.79933	0.622449	0.01	0.00555556	0.0243056	0.0126945	0.00970149
CGI277	Bzw1	1	58449372	58450947	1375	+	150	0.886218	0.707636	0.00555556	0	0.0373733	0.0123826	0.0021978
CGI278	Clk1	1	58480071	58481217	946	+	82	0.996639	0.591966	0.00219377	0.0213033	0.0273458	0.0340538	0.0213294
CGI279	Ppil3	1	58501810	58502647	637	+	37	0.667592	0.593407	0.307999	0.0141016	0.0507479	0.111292	0.0284955
CGI280	Orc2	1	58561178	58562188	810	+	71	0.839032	0.646914	0.0296892	0.0063428	0.0699164	0.00820143	0.0172712
CGI281	Ndufb3, Fam126b	1	58642552	58643741	989	+	56	0.724536	0.575329	0.0114943	0	0.0348898	0.0169224	0.0299427
CGI282		1	58709231	58709922	491	+	31	0.621823	0.639511	0.0594139	0.0322581	0.0571429	0.0423198	0.0425725
CGI283		1	58768126	58768878	552	+	44	0.808187	0.630435	0.025641		0.0544715	0.026841	0
CGI284	Cflar	1	58770046	58770615	369	+	24	0.790604	0.574526	0.169437	0	0.0499032	0.0560542	0.104516
CGI285	Cflar	1	58793747	58794118	171	+	9	0.58023	0.608187	1	0.0147059	0.184524	0.294222	0.415159	Oocyte-methylated, gDMR
CGI286	Casp8	1	58852255	58852880	425	+	30	0.799254	0.595294	0.0588235		0.0218381	0.0174799	0.0294118
CGI287	Stradb	1	59029636	59031176	1340	+	97	0.698213	0.644776	0.0472906	0.0261111	0.0260459	0.0104875	0.023374
CGI288	Als2cr11	1	59151580	59151992	212	+	13	0.699258	0.599057	0.0648148	0.0555556	0.103175	0.0252512	0.587276
CGI289	Als2cr4	1	59176390	59177558	968	+	82	0.768238	0.667355	0.0625	0.0131579	0.00239234	0.0140466	0.0533333
CGI290	Als2	1	59293539	59294515	776	+	65	0.831359	0.635309	0.0243902	0	0.044175	0.0196774	0.0166502
CGI291		1	59538144	59538732	388	+	22	0.663621	0.587629	0.00158983	0	0.0095943	0.0310141	0.025
CGI292	Fzd7	1	59538553	59541544	2791	+	229	0.809103	0.637406	0.0402809	0.024163	0.024601	0.0196444	0.0403972
CGI293	Gm973	1	59572814	59573278	264	+	13	0.625917	0.568182	0	0	0	0.0142448	0
CGI294	Sumo1	1	59726795	59728051	1056	+	87	0.763691	0.658144	0.0248567	0	0.0992176	0.00698975	0.0373958
CGI295	Nop58	1	59741615	59742328	513	+	38	1.00889	0.547758	0.0455479	0.0333333	0.0968866	0.00959486	0.0333333
CGI296	Bmpr2	1	59819398	59821891	2293	+	206	0.868575	0.643698	0.0245098	0.00205128	0.0302697	0.0175621	0.00882414
CGI297	Als2cr13	1	59969221	59971150	1729	+	182	0.907752	0.681319	0.010918	0	0.0638504	0.00700965	0.00350877
CGI298	Ica1l	1	60099216	60100593	1177	+	123	0.95423	0.662702	0.015876	0	0.0482053	0.056515	0.00756303
CGI299	Wdr12	1	60154323	60154719	196	+	11	0.912061	0.5	0.0208333	0	0.0372209	0.0248392	0
CGI300	Carf	1	60154813	60155773	760	+	71	0.83536	0.669737	0.0513441	0.0404526	0.0481217	0.00766956	0.0179104
CGI301	Nbeal1	1	60236880	60238131	1051	+	100	0.849484	0.672693	0.0011623	0	0.0426932	0.00719973	0.008
CGI302	Cyp20a1	1	60399677	60400777	900	+	64	0.759757	0.612222	0.0206112	0.0118046	0.0213333	0.00615304	0.047619
CGI303	Abi2	1	60465738	60467299	1361	+	132	0.904083	0.660544	0.00192308	0	0.0325985	0.0259672	0.0285847
CGI304	Raph1	1	60622745	60624470	1525	+	150	0.887261	0.670164	0.00625	0	0.0243691	0.0176173	0.00879451
CGI305	Cd28	1	60819831	60820233	202	+	15	1.19508	0.5	0.00909091	0.0909091	0.064899	0.0286005	0.485847
CGI306		1	60977906	60978287	181	+	16	1.221	0.541436	0.00271739	0	0.133333	0.0607143	0
CGI307		1	61259961	61260325	164	+	11	0.959338	0.530488	0.0297619		0.0547009	0.00892857	0.528205
CGI308	Pard3b	1	61685079	61686333	1054	+	96	0.764684	0.690702	0.0607955	0.0282443	0.00284091	0.0364133	0.030303
CGI309	Nrp2	1	62749172	62750527	1155	+	94	0.806856	0.636364	0.00990983	0	0.0313442	0.0160842	0.0136555
CGI310	Nrp2	1	62751909	62754492	2383	+	130	0.645417	0.582039	0.0221433	0.00782704	0.0364583	0.0236643	0.014058
CGI311	Nrp2	1	62842152	62842704	352	+	22	0.629953	0.642045	0.0416906	0	0.0227171	0.0313064	0.0797864
CGI312	Ino80d	1	63159599	63161480	1681	+	138	0.739171	0.668055	0.0346154	0.0293973	0.0493926	0.0077529	0.0109649
CGI313	Eef1b2, Ndufs1	1	63222936	63224220	1084	+	83	0.858068	0.597786	0.073757	0.0183824	0.050437	0.0120033	0.0102041
CGI314	Gpr1	1	63246657	63247300	443	+	26	0.862398	0.530474	0.967794		0.0303792	0.298594	0.142157	Oocyte-methylated, gDMR
CGI315		1	63294578	63295469	691	+	54	0.897451	0.591896	0.00902778	0.0357143	0.112259	0.0153575	0.0925474
CGI316	Zdbf2	1	63319260	63320704	1244	+	144	1.00887	0.680064	0.0194175	0.0595238	0.0394503	0.0228825	0.0613757
CGI317	Zdbf2	1	63355541	63356642	901	+	94	0.85931	0.713651	0.000306185		0.0703788	0.241719	0.258664
CGI318	Adam23	1	63491746	63493528	1582	+	116	0.707208	0.64665	0.0282296	0.00285714	0.105217	0.0856183	0.130134
CGI319		1	63660793	63661374	381	+	22	0.599947	0.627297	0.000453515		0.0555556	0.015662	0.0215054
CGI320	Dytn	1	63711161	63711541	180	+	12	0.91072	0.544444	0	0.0625	0.203741	0.0176103	0.503597
CGI321	Fastkd2, Mdh1b	1	63776803	63777552	549	+	32	0.947615	0.499089	0.0377926	0.00601915	0.0499131	0.0116634	0.0138889
CGI322	Klf7	1	64125225	64125736	311	+	15	0.550594	0.594855	1	0.0526316	0.935889	0.352357	0.461525	Oocyte and sperm-methylated
CGI323	Klf7	1	64167730	64169227	1297	+	98	0.766087	0.628373	0.0129008	0.0176984	0.0254386	0.0166334	0.0308691
CGI324		1	64354977	64355608	431	+	15	0.557422	0.5058	0	0	0.04	0.133672	0.7
CGI325	Creb1	1	64578364	64580432	1868	+	188	0.88686	0.675054	0.0351703	0	0.0426691	0.0122982	0.027194
CGI326	Fam119a	1	64663304	64664544	1040	+	87	0.792925	0.65	0.0308618	0.0333333	0.070216	0.0207364	0
CGI327	Ccnyl1	1	64736685	64738371	1486	+	154	0.931443	0.66891	0.0372987	0	0.0521892	0.0264647	0.016121
CGI328	Fzd5	1	64781239	64785062	3623	+	271	0.736865	0.637317	0.449082	0.0160019	0.0448664	0.058228	0.0176519
CGI329	Plekhm3	1	65002899	65003561	462	+	41	0.839032	0.662338	0.0625	0.0681818	0.0563123	0.048226	0.0340909
CGI330	Cryga	1	65149422	65149948	326	+	18	0.681888	0.57362	0.0625	0.00483092	0.0571429	0.0244383	0.706236
CGI331	D630023F18Rik	1	65156291	65156839	348	+	20	0.678862	0.583333			0.00657895	0.214606	0.02
CGI332	Idh1	1	65225160	65226158	798	+	47	0.664092	0.600251	0.0188679	0	0.0334165	0.0132854	0.0311033
CGI333	Idh1, Pikfyve	1	65232721	65233821	900	+	73	0.841562	0.631111	0.0200728		0.00653595	0.0155624	0.00793651
CGI334	Pth2r	1	65357699	65358438	539	+	24	0.462133	0.621521	0.0298525	0.0526316	0.0625	0.0437171	0.153846
CGI335	Mtap2	1	66221321	66222369	848	+	69	0.71369	0.675708	0.00524138	0	0.0228697	0.00953846	0.0158464
CGI336	Unc80	1	66514235	66515563	1128	+	85	0.698354	0.657801	0.0132812	0	0.053	0.010794	0.0390701
CGI337	Rpe	1	66747127	66748226	899	+	72	0.782194	0.640712	0.0307918	0.0246645	0.0368867	0.0128164	0.0111111
CGI338	1110028C15Rik	1	66862726	66864912	1986	+	171	0.85848	0.637462	0.00941747	0.0909091	0.0322557	0.0168267	0.017094
CGI339	Acadl	1	66909175	66910413	1038	+	90	0.890157	0.626204	0.021234	0	0.0426788	0.0164585	0
CGI340	Lancl1	1	67084867	67085795	728	+	52	0.786997	0.603022	0.0526849	0.047619	0.00921474	0.0253388	0.0232558
CGI341	Erbb4	1	69152570	69155055	2285	+	144	0.68858	0.605252	0.0492392	0.0189702	0.0442835	0.0191098	0.0227513
CGI342		1	69423409	69425027	1418	+	82	0.598642	0.622708	0.993939	0	0.125927	0.327963	0.449859	Oocyte-methylated, gDMR
CGI343		1	69733390	69734698	1108	+	110	1.0046	0.629061	0.0104167	0	0.0447694	0.0158745	0.0447619
CGI344	Spag16	1	69873276	69873992	516	+	36	0.673472	0.653101	0.0151515	0.0833333	0.0416667	0.019057	0.05
CGI345	Vwc2l	1	70772111	70772538	227	+	11	0.572614	0.585903	0.846739	0	0.0384615	0.263497	0	Oocyte-methylated, gDMR
CGI346	Vwc2l	1	70886162	70886621	259	+	19	1.07627	0.53668	0	0	0.0047619	0	0.6
CGI347	Bard1	1	71148713	71149913	1000	+	77	0.7734	0.632	0.00824161	0.011194	0.0653846	0.0230484	0.00595238
CGI348	Atic	1	71603362	71604336	774	+	55	0.679003	0.648579	0.0869565	0.166667	0.152707	0.0134124	0.0150072
CGI349	Fn1	1	71699055	71700220	965	+	65	0.697947	0.621762	0.0621882	0.0181818	0.0617134	0.0251781	0.00909091
CGI350	Mreg	1	72258089	72259155	866	+	91	0.97369	0.658199	0.023985	0.00757576	0.0476402	0.0103311	0.025842
CGI351		1	72272199	72272707	308	+	18	0.707911	0.577922	0.0269608	0	0.0226881	0.0178322	0.0137037
CGI352		1	72282742	72283406	464	+	30	0.754874	0.586207	0.0309715	0	0.0264974	0.0149241	0.0157915
CGI353		1	72290211	72290901	490	+	43	0.943602	0.620408	0.00357495	0.0333333	0.0892155	0.0230781	0.0125
CGI354		1	72301132	72301602	270	+	20	0.802023	0.633333	0.0508486	0	0.0708571	0.0238339	0.00841505
CGI355	Pecr, Tmem169	1	72330510	72331167	457	+	29	0.651082	0.634573	0.000884173	0	0.0385869	0.0135206	0.00298507
CGI356	Xrcc5	1	72353788	72354557	569	+	25	0.626734	0.530756	0	0.00641026	0.0474257	0.0105153	0.0166667
CGI357	2011-03-04	1	72582531	72583961	1230	+	70	0.586862	0.623577	0.03125	0	0.0143557	0.061482	0.0206747
CGI358	Smarcal1	1	72629672	72630188	316	+	15	0.674475	0.53481	0.0374511	0	0.0873106	0.0159276	0.00297619
CGI359		1	72687163	72688074	711	+	48	0.930138	0.540084	0.0131579	0.0227273	0.0186622	0.0210536	0.222073
CGI360	Rpl37a	1	72757327	72758671	1144	+	84	0.960207	0.553322	0.0449907	0.019697	0.0507136	0.012577	0.0162957
CGI361	Igfbp2	1	72870504	72872336	1632	+	111	0.724681	0.619485	0.0141304	0.0167832	0.0274756	0.0368377	0.0204977
CGI362	Igfbp5	1	72908839	72909278	239	+	17	0.81002	0.594142	0.96997		0.231373	0.231326	0.0933333	Oocyte-methylated
CGI363	Igfbp5	1	72916687	72917228	341	+	13	0.465164	0.583578	0.00742588	0.0526316	0.0579437	0.0308999	0.00913978
CGI364	Igfbp5	1	72918211	72918846	435	+	23	0.765793	0.533333	0.0225	0	0.0446429	0.0713535	0.00714286
CGI365	Igfbp5	1	72920009	72921437	1228	+	66	0.641487	0.579805	0	0.0510204	0.0351125	0.0195652	0.0148551
CGI366		1	73953636	73954311	475	+	29	0.857289	0.553684	0.0133333	0.84	0.559722	0.0372365	0.848729
CGI367	Tns1	1	73960965	73961350	185	+	11	0.655788	0.605405	0	0	0.0833333	0.0470008	0.497563
CGI368	Tns1	1	74083302	74084070	568	+	33	0.521064	0.669014	0.0684418	0.0531532	0.113636	0.0273735	0.0402116
CGI369	Tns1	1	74114530	74115721	991	+	51	0.521589	0.633703	0.0232558	0.117647	0.0348837	0.0200066	0.0409091
CGI370	Tns1	1	74144637	74145760	923	+	58	0.605656	0.644637	0.112121	0.00909091	0.0412851	0.0245838	0.0185217
CGI371	Tns1	1	74170568	74171916	1148	+	90	0.690837	0.674216	0.0526316		0.0431624	0.0155778	0.0294011
CGI372	Cxcr1	1	74238664	74239324	460	+	19	0.599688	0.528261	0.0265657	0.000438296	0.0490683	0.0185828	0.872699
CGI373	Arpc2	1	74282530	74284038	1308	+	109	0.799809	0.649083	0.0209751	0	0.0418519	0.0111195	0.0316219
CGI374	Pnkd, Aamp	1	74330677	74332173	1296	+	82	0.684037	0.615741	0.0749063	0	0.0569057	0.0206821	0.013243
CGI375	Tmbim1, Pnkd	1	74350138	74351037	699	+	58	0.714111	0.685265	0.0116647	0.0499086	0.0791667	0.031324	0.00526316
CGI376	Pnkd	1	74378783	74379553	570	+	44	0.727243	0.652632	0.00145774	0	0.0303008	0.0195755	0.0043877
CGI377	Gm216	1	74414663	74415833	970	+	56	0.806479	0.541237	0.0564671	0.0294118	0.0805644	0.12662	0.449363
CGI378		1	74433188	74433759	371	+	20	0.5141	0.652291	0	0.0909091	0	0.0277591	0.0119048
CGI379		1	74436151	74436938	587	+	34	0.695231	0.579216	0.000757576	0.00813824	0.0203156	0.0123467	0.0306452
CGI380	Ctdsp1	1	74437764	74439494	1530	+	131	0.723087	0.688889	0.277536	0.0333333	0.0292004	0.0533856	0.0527597
CGI381	Ctdsp1	1	74440295	74440732	237	+	8	0.401695	0.586498	0.76601	0	0.716667	0.291374	0.235629
CGI382	Ctdsp1	1	74441120	74441680	360	+	16	0.54527	0.572222	0.913051	0.00103564	0.783482	0.316017	0.681287	Oocyte-methylated
CGI383	Ctdsp1	1	74441931	74442344	213	+	8	0.448295	0.58216	0.872723	0.00193862	0.775	0.263872	0.56297	Oocyte-methylated
CGI384	Ctdsp1	1	74443763	74444567	604	+	40	0.656754	0.635762	0	0.00833333	0.0147059	0.0341533	0.0909091
CGI385	Usp37, Rqcd1	1	74551785	74553591	1606	+	123	0.815353	0.613325	0.0416787	0.0289855	0.0369164	0.0194642	0.0221292
CGI386	Zfp142, Bcs1l	1	74633896	74635239	1143	+	75	0.686648	0.619423	0.105601	0.00115054	0.03672	0.0289332	0.00843373
CGI387	Rnf25, Stk36	1	74647384	74648231	647	+	38	0.679584	0.588872	0.03125	0.0019305	0.053449	0.022443	0.00490196
CGI388	Ttll4	1	74707913	74708880	767	+	67	0.841446	0.647979	0.0301489	0.0178571	0.0386789	0.0278701	0.030303
CGI389	Cyp27a1	1	74759999	74760614	415	+	26	0.655043	0.619277	0.0403353	0.0384615	0.00863679	0.0278476	0.131663
CGI390	Prkag3	1	74795075	74795750	475	+	28	0.663649	0.597895	0.0238095	0.04	0.00625	0.0146089	0.0748299
CGI391	Wnt6	1	74817584	74819310	1526	+	107	0.675787	0.653997	0.028481	0	0.0489552	0.0222017	0.0560565
CGI392	Wnt6	1	74828656	74829816	960	+	44	0.511492	0.605208	0.000407	0.053374	0.0764121	0.0225397	0.202931
CGI393	Wnt6	1	74830199	74831496	1097	+	79	0.753951	0.62443	0.0821012	0.0372504	0.0533535	0.0245042	0.0855876
CGI394	Wnt10a	1	74837716	74839040	1124	+	61	0.488344	0.671708	0	0	0.0261905	0.044138	0.0870061
CGI395	Wnt10a	1	74840646	74841902	1056	+	46	0.478319	0.617424	0.0308047	0	0.0677083	0.0109055	0.0819277
CGI396	Wnt10a	1	74846900	74847680	580	+	36	0.652974	0.617241	0.0225	0	0.0234534	0.0291137	0.063937
CGI397	Wnt10a	1	74849467	74850610	943	+	56	0.608332	0.626723	0	0.0432703	0.175	0.0145722	0.0205479
CGI398		1	74853491	74853967	276	+	19	0.630912	0.663043	0	0.0495985	0	0.00947525	0.0363248
CGI399		1	74863306	74863989	483	+	30	0.694208	0.604555	0.00655271	0.111842	0.016369	0.00911731	0.0213134
CGI400	Cdk5r2	1	74900934	74903284	2150	+	191	0.793839	0.670698	0.0322429	0.047619	0.0518304	0.0196724	0.0236264
CGI401	Cdk5r2	1	74903726	74904117	191	+	16	0.883037	0.628272	0	0	0.0446429	0.0166659	0.0652174
CGI402		1	74904562	74905787	1025	+	51	0.66202	0.553171	0.140235	0	0.0481498	0.017312	0.0529026
CGI403	Fev	1	74928217	74929899	1482	+	97	0.727947	0.605263	0.0435924	0.0125	0.0436413	0.0184331	0.0539146
CGI404	Fev	1	74930844	74932687	1643	+	109	0.66104	0.637249	0.00703125	0.0532468	0.0591628	0.0188351	0.0280675
CGI405	Cryba2	1	74939138	74940373	1035	+	55	0.608586	0.591304	0.0250346	0	0.0834711	0.0179305	0.00740741
CGI406		1	74946855	74947894	839	+	64	0.665101	0.678188	0.00961538	0.0300623	0.0166667	0.037605	0.015873
CGI407	Ihh	1	74994343	74995308	765	+	41	0.563145	0.619608	0	0	0.124569	0.049494	0.116522
CGI408	Ihh	1	74996172	74999042	2670	+	198	0.697965	0.65206	0.0378873	0.0138272	0.0438351	0.0205797	0.0736697
CGI409	Nhej1	1	75121014	75122044	830	+	54	0.757752	0.592771	0.0239372	0	0.113674	0.0160914	0.0459402
CGI410	1810031K17Rik	1	75137781	75138741	760	+	60	0.819941	0.621053	0.0390071	0	0.0236116	0.0106784	0.063223
CGI411	1810031K17Rik, Fam134a	1	75138709	75140186	1277	+	99	0.784487	0.629601	0.0305892	0.03125	0.0607338	0.0119668	0.0315227
CGI412	Zfand2b	1	75164933	75166001	868	+	58	0.713102	0.619816	0.155709	0	0.0788567	0.039465	0.0307018
CGI413	Abcb6	1	75176171	75177244	873	+	50	0.592985	0.623139	0.0449048	0.0789474	0.016129	0.0236837	0.0809783
CGI414	Atg9a, Ankzf1	1	75187880	75189458	1378	+	78	0.610648	0.609579	0.0299837	0.084381	0.134722	0.0188612	0.0632184
CGI415	Glb1l	1	75205626	75206266	440	+	20	0.573662	0.563636	0.0165974	0.0440476	0.154058	0.0107866	0.0364583
CGI416	Stk16, Glb1l	1	75207160	75208010	650	+	43	0.682858	0.623077	0.0981905	0.0555556	0.0227273	0.0321077	0.020339
CGI417	Tuba4a	1	75214972	75216900	1728	+	105	0.672763	0.601273	0.0439779		0.0790936	0.0278858	0.0738379
CGI418	Dnajb2	1	75232651	75233788	937	+	65	0.675195	0.641409	0.0828107	0	0	0.0157704	0.0201465
CGI419	Ptprn	1	75248091	75248704	413	+	20	0.525551	0.610169	0	0	0.0609375	0.0204524	0.115374
CGI420	Ptprn	1	75259970	75260971	801	+	49	0.674575	0.632959	0.00317391	0	0.0544125	0.0208329	0.0147344
CGI421	Resp18	1	75274666	75275039	173	+	11	0.815884	0.560694	1	0	0.0269608	0.175019	0.0192235	Oocyte-methylated, gDMR
CGI422	Dnpep	1	75312979	75314868	1689	+	126	0.794647	0.625222	0.081755	0.027027	0.0448889	0.023249	0.0165529
CGI423	Des	1	75356650	75358015	1165	+	85	0.704803	0.643777	0.0204966	0	0.0414232	0.0162325	0.0745141
CGI424		1	75365992	75366562	370	+	20	0.720673	0.554054	0.0010352	0.0503111	0.0516218	0.00644292	0.19496
CGI425	Speg	1	75371699	75372592	693	+	49	0.59474	0.691198	0.0146154		0.0333333	0.0269373	0.0634921
CGI426	Speg	1	75378093	75379382	1089	+	76	0.601965	0.681359	0.047619	0	0.0311237	0.028882	0.0561408
CGI427	Speg	1	75381148	75382077	729	+	35	0.476733	0.63786	0.075	0.0909091	0.237638	0.0192693	0.469719
CGI428	Speg	1	75384080	75385930	1650	+	119	0.65734	0.66303	0.0382599	0.0215054	0.0421212	0.018813	0.0510511
CGI429	Speg	1	75418370	75420303	1733	+	126	0.635549	0.676861	0.0213659	0.0717593	0.0605742	0.0192328	0.109703
CGI430	Gmppa	1	75432283	75432928	445	+	23	0.701357	0.550562	0.0144928	0.037037	0.0464165	0.0201241	0.013285
CGI431		1	75442321	75442719	198	+	11	0.660947	0.590909	0	0	0.0764957	0.0733443	0.075
CGI432		1	75445557	75446033	276	+	15	0.546718	0.634058	0		0.823718	0.0481659	0.162757	Sperm-methylated, gDMR
CGI433	Accn4	1	75446700	75447501	601	+	35	0.538821	0.658902	0	0	0.0150568	0.0259018	0.0472884
CGI434	Accn4	1	75454831	75455551	520	+	34	0.603422	0.659615	0	0	0.0761607	0.0702006	0.059785
CGI435	Chpf	1	75472348	75472864	316	+	21	0.667375	0.632911	1	0.000783699	0.41485	0.312114	0.569974	Oocyte-methylated
CGI436	Chpf	1	75473699	75474505	606	+	33	0.5951	0.605611	0.65	0.0431548	0.00833333	0.0959735	0.109756
CGI437	Chpf, Tmem198	1	75475044	75476706	1462	+	128	0.709194	0.703146	0.0487285	0.0422535	0.0441899	0.0187111	0.026258
CGI438	Tmem198	1	75479129	75479754	425	+	26	0.530514	0.68	0.0172414	0.0437788	0.230556	0.0596931	0.324779
CGI439	Obsl1	1	75483118	75484981	1663	+	101	0.650806	0.612147	0.0363978	0.000777727	0.0426238	0.0156487	0.0464347
CGI440	Obsl1	1	75489400	75489783	183	+	9	0.457725	0.661202	0.0119048	0.00649351	0	0.182958	0.4
CGI441	Obsl1	1	75500028	75500693	465	+	30	0.71418	0.602151	0.00588235		0.293678	0.015001	0.294187
CGI442	Obsl1	1	75501595	75503394	1599	+	148	0.80046	0.681051	0.0412815	0.0181818	0.00980392	0.0196131	0.0142276
CGI443	Inha	1	75506055	75506667	412	+	21	0.502844	0.645631	0.06413	0.0666667	0.108959	0.0265143	0.193593
CGI444	Stk11ip	1	75517879	75518675	596	+	44	0.855359	0.588926	0.0113636	0	0.032971	0.0242883	0.0229508
CGI445	Slc4a3	1	75542488	75543597	909	+	63	0.615962	0.676568	0.0015873	0.2	0.0763889	0.0182882	0.0514706
CGI446		1	75651044	75651460	216	+	13	0.7845	0.555556	0	0.00175439	0.00952381	0.0268556	0.481751
CGI447	Epha4	1	77509886	77510589	503	+	27	0.638876	0.580517	0.0165033	0	0.0277778	0.0291514	0.0227273
CGI448	Epha4	1	77510546	77512539	1793	+	104	0.687471	0.582264	0.0133702	0.0521341	0.0160178	0.0229573	0.0291824
CGI449		1	77512555	77513578	823	+	42	0.65522	0.558931	0.0396024	0.025	0.0683057	0.0122176	0.0466146
CGI450		1	78078244	78078735	291	+	15	0.784956	0.525773	0.0115385		0.05245	0.0670956	0.552831
CGI451	Pax3	1	78186022	78186789	567	+	43	0.73161	0.652557	0.000609756	0	0.0521715	0.188261	0.0323413
CGI452	Pax3	1	78191686	78192118	232	+	13	0.65635	0.586207	0.0468254	0	0.0396876	0.0168084	0.0813179
CGI453	Pax3	1	78192752	78194021	1069	+	67	0.689798	0.604303	0.0321429	0.0344828	0.010352	0.0368228	0.045045
CGI454		1	78197943	78198602	459	+	20	0.536884	0.572985	0.0241935		0.0384615	0.0267079	0.0688347
CGI455		1	78200125	78200881	556	+	32	0.850709	0.543165	0.0326825	0.05	0.0388889	0.0187132	0.0314286
CGI456		1	78212352	78214912	2360	+	197	0.792856	0.649153	0.167204	0.0472973	0.0388272	0.0376758	0.0396293
CGI457	Sgpp2	1	78306443	78307688	1045	+	80	0.773591	0.631579	0.43474	0.0105011	0.0382775	0.118221	0
CGI458	Farsb	1	78484817	78485679	662	+	51	0.862755	0.599698	0.0373231	0.00325253	0.0242857	0.00993628	0.0185676
CGI459	Mogat1	1	78508187	78508834	447	+	24	0.570794	0.621924	0	0	0.025	0.0162226	0.0833333
CGI460	Mogat1	1	78534046	78534589	343	+	12	0.427333	0.580175	0.0536936	0	0.40659	0.0808978	0.509302
CGI461	Acsl3, Utp14b	1	78653969	78655304	1135	+	125	0.889474	0.706608	0.0272721	0.0437206	0.0378788	0.0295607	0
CGI462	Scg2	1	79436458	79436813	155	+	12	0.825431	0.619355	0.5		0.0368421	0.0403815	0
CGI463		1	79446880	79447240	160	+	7	0.602053	0.55	0	0	0.010989	0.0496949	0
CGI464	Ap1s3	1	79667993	79669077	884	+	54	0.660449	0.623303	0.0420635		0.0294629	0.0277521	0.0125188
CGI465	Wdfy1	1	79757327	79757786	259	+	8	0.425538	0.583012	0	0	0.0858475	0.139368	0.0530303
CGI466	Wdfy1	1	79757665	79758669	804	+	66	0.861425	0.619403	0	0	0.0340388	0.0603196	0.0041978
CGI467	Mrpl44	1	79772385	79773126	541	+	38	0.716934	0.626617	0.0173975	0.0185185	0.0169164	0.0114712	0.0383379
CGI468	Serpine2	1	79854541	79855965	1224	+	106	0.776258	0.668301	0.0425642	0.0372719	0.00543478	0.0201296	0.0484018
CGI469	Fam124b	1	80196614	80196970	156	+	9	0.783292	0.544872	1	0	0.0612245	0.216534	0.852941	Oocyte-methylated, gDMR
CGI470	Cul3	1	80336112	80337924	1612	+	173	0.897293	0.706576	0	0	0.0722961	0.0273314	0.0268132
CGI471		1	80380743	80381205	262	+	9	0.384259	0.599237	0.0626263	0	0	0.029786	0.489356
CGI472	Dock10	1	80754379	80755559	980	+	88	0.806729	0.672449	0.0408574	0.5	0.0383673	0.0206153	0
CGI473	Irs1	1	82279646	82280204	358	+	27	0.684684	0.664804	0.00264738	0	0.0320224	0.0127253	0.0188041
CGI474	Irs1	1	82285249	82288683	3234	+	201	0.621104	0.632962	0.0700208	0.0323232	0.0916994	0.0129679	0.064069
CGI475	Rhbdd1	1	82312646	82313715	869	+	71	0.88349	0.61565	0.025641	0.0238806	0.0235883	0.0163095	0.0523256
CGI476	Col4a3, Col4a4	1	82583045	82584080	835	+	41	0.499913	0.628743	0	0.0357143	0.014881	0.0280515	0.103175
CGI477	Mff	1	82721205	82722341	936	+	64	0.852231	0.571581	0	0.0434783	0.0314481	0.0101452	0.0128205
CGI478	Agfg1	1	82835529	82837085	1356	+	129	0.839503	0.679204	0.0504786	0	0.0467949	0.012084	0.0535714
CGI479		1	83001005	83001401	196	+	11	0.691908	0.571429	0	0.0599904	0.136364	0.0256902	0.889815
CGI480	Slc19a3	1	83034610	83035056	246	+	13	0.621334	0.585366	0.0333333	0	0.0683333	0.0107047	0
CGI481	Wdr69	1	83156133	83156599	266	+	13	0.572025	0.586466	0	0	0.0296919	0.0138358	0
CGI482	Sphkap	1	83404353	83404984	431	+	18	0.506253	0.575406	0.103175	0	0.0151515	0.0370528	0.14059
CGI483	Pid1	1	84280473	84281561	888	+	53	0.622747	0.620495	0.998433	0	0.0943182	0.164467	0	Oocyte-methylated, gDMR
CGI484	Dner	1	84691702	84693128	1226	+	89	0.691268	0.652529	0.00968349	0.0316556	0.0666667	0.0209813	0.0365971
CGI485	Trip12, Fbxo36	1	84834803	84837087	2084	+	172	0.816352	0.65739	0.00921375	0.00926371	0.0413402	0.0232648	0.0115393
CGI486	Slc16a14	1	84930714	84931830	916	+	62	0.698384	0.626638	0.0376451	0.037037	0.0255836	0.0195958	0.00438596
CGI487		1	85268775	85269175	200	+	5	0.316046	0.565			0	0	1
CGI488		1	85273448	85273829	181	+	4	0.352042	0.502762	0.27766	0	0.923579	0.0803985	0.613636	Sperm-methylated
CGI489	Sp110	1	87487723	87488597	674	+	12	0.262988	0.534125		0	0.166667	0.05	1
CGI490	Sp110	1	87488774	87489548	574	+	10	0.300419	0.482578	1	0	0.9	0.289444	0.833333	Oocyte and sperm-methylated
CGI492	Sp100	1	87599907	87600484	377	+	16	0.558814	0.572944	0.2	0	0.0456482	0.0977153	0.160317
CGI493	Cab39	1	87689640	87691247	1407	+	150	0.956869	0.668799	0.0199232	0.00512821	0.0293471	0.0124039	0.0139789
CGI494	Itm2c	1	87790801	87791814	813	+	56	0.771304	0.611316	0	0.00195138	0.0106275	0.0117109	0.0411164
CGI495	Itm2c	1	87792054	87792472	218	+	12	0.67317	0.573394	0.0375	0	0.102564	0.00625	0.0181704
CGI496		1	87914515	87915581	866	+	60	0.710967	0.624711	0.0401653	0.0228659	0.0569196	0.0111411	0.099906
CGI497	2810459M11Rik	1	87942144	87943462	1118	+	112	0.907353	0.670841	0.0300595	0.00127551	0.0242788	0.0131662	0.0344828
CGI498	2810459M11Rik	1	87943515	87944025	310	+	17	0.797444	0.525806	0.252098	0	0.0450413	0.0137532	0.123016
CGI499	Psmd1	1	87961001	87961833	632	+	49	0.68858	0.674051	0.0377358	0.00052521	0.0335454	0.00924763	0
CGI500	Armc9	1	88050934	88051749	615	+	45	0.794978	0.60813	0.0787646	0	0.105981	0.0267877	0.0410256
CGI501	B3gnt7	1	88199390	88200853	1263	+	82	0.660991	0.627078	0.672282	0	0.0555556	0.0794044	0.054934
CGI502		1	88210051	88210748	497	+	19	0.465468	0.575453	0.569569		0	0.145483	0.0416667
CGI503	Ncl	1	88255027	88257010	1783	+	170	0.932275	0.640494	0.0383682	0.0196285	0.0499049	0.0132432	0.0190294
CGI504	Nmur1	1	88284036	88284696	460	+	23	0.568589	0.595652	0.072593	0	0.0357143	0.226147	0.638816
CGI505	1700019O17Rik	1	88324219	88324582	163	+	9	0.567495	0.625767	0.00416667	0	0.166667	0.00890345	0.565079
CGI506		1	88330692	88331619	727	+	52	0.6525	0.662999	0.020365	0.0221088	0.012037	0.0169106	0.0633641
CGI507		1	88338456	88339940	1284	+	106	0.800595	0.642523	0.0307765	0.00489268	0.0369098	0.0525187	0.0128085
CGI508		1	88368693	88369141	248	+	20	0.685207	0.689516	0.054327	0.0018797	0.0208333	0.0257872	0.0294118
CGI509		1	88383642	88384852	1010	+	96	0.965876	0.627723	0.0219785	0	0.0339918	0.0127687	0.0145833
CGI510		1	88400186	88401404	1018	+	70	0.672418	0.640472	0.0144772	0.03125	0.0317982	0.0171931	0.040796
CGI511	Ptma	1	88421227	88425621	4194	+	381	0.865425	0.648069	0.0509996	0.0242418	0.0339577	0.0131478	0.0358706
CGI512	Pde6d	1	88478521	88479536	815	+	51	0.622231	0.646626	0	0	0.0144444	0.0186897	0.0142857
CGI513	Cops7b	1	88483433	88484334	701	+	39	0.651471	0.584879	0.40863	0	0.049549	0.0498415	0.0267802
CGI514	Nppc	1	88565949	88567704	1555	+	101	0.688185	0.614791	0.0424282	0.022017	0.0453361	0.0225534	0.0848565
CGI515	Dis3l2	1	88599726	88600916	990	+	78	0.796723	0.630303	0.00926596	0.00535714	0.0312389	0.0177903	0.0384462
CGI516	Alppl2	1	88983530	88984180	450	+	25	0.597322	0.611111	0.719277	0	0.1	0.0534718	0.715278
CGI517	Alpi	1	88995072	88995761	489	+	28	0.589096	0.627812	0.0111111	0.0213765	0.0277778	0.0302782	0.179487
CGI518	Akp3	1	89023585	89024632	847	+	46	0.589495	0.61039	0.311701	0	0.0619048	0.0332075	0.447059
CGI519	Ecel1	1	89045858	89046237	179	+	11	0.912471	0.541899	0.125121	0	0	0.117645	0.733907
CGI520	Ecel1	1	89049924	89051799	1675	+	138	0.792213	0.64597	0.0415732	0	0.03625	0.0233982	0.0346498
CGI521		1	89051877	89053268	1191	+	73	0.597408	0.642317	0.0816327	0	0.138542	0.0247465	0.0316176
CGI522		1	89081074	89081734	460	+	23	0.556795	0.6	0.312414	0	0.0621212	0.0714346	0.0912281
CGI523		1	89082858	89083944	886	+	63	0.708431	0.634312	0.0603535	0.00606061	0.00909091	0.0172487	0.0805085
CGI524	Chrng	1	89102529	89103240	511	+	22	0.521653	0.575342	0.0172985	0	0.133971	0.328547	0.231536
CGI525	Eif4e2	1	89110041	89111301	1060	+	98	0.860639	0.656604	0.000679348	0.00351897	0.0515152	0.0274226	0.0406667
CGI526		1	89154973	89155421	248	+	12	0.49512	0.629032	0.0196078	0.0616659	0.0784314	0.0375169	0.127019
CGI527	Efhd1	1	89160366	89161691	1125	+	82	0.744133	0.627556	0.0133491	0.016129	0.060866	0.031288	0.0223748
CGI528	Gigyf2	1	89223095	89224421	1126	+	91	0.705378	0.680284	0.0175439	0	0	0.0125917	0.04
CGI529	3110079O15Rik	1	89371543	89372426	683	+	36	0.541962	0.626647	0.736101	0.15625	0.127273	0.240182	0.146825
CGI530	Ngef	1	89405690	89407555	1665	+	137	0.752757	0.664264	0.972222	0	0.0400844	0.150271	0.042268	Oocyte-methylated, gDMR
CGI531		1	89504313	89504728	215	+	9	0.585908	0.562791	0.173271	0.038961	0.01921	0.0475303	0.461965
CGI532	Inpp5d	1	89516987	89517362	175	+	9	0.550018	0.617143	0.888889	0	0	0.164164	0.177222	Oocyte-methylated, gDMR
CGI533	Atg16l1	1	89652285	89653415	930	+	91	1.05073	0.610753	0.0119151	0.0240046	0.0283248	0.0130754	0.0322823
CGI534	Dgkd	1	89749465	89750951	1286	+	119	0.79705	0.68196	0.0385613	0.032967	0.0359821	0.0320863	0.0288954
CGI535	Usp40	1	89904503	89905313	610	+	47	0.817242	0.622951	0.00277008	0	0.0601852	0.0167657	0
CGI536	Ugt1a6b, Dnajb3, Ugt1a2, Ugt1a6a, Ugt1a10, Ugt1a5, Ugt1a7c, Ugt1a9	1	90101618	90102717	899	+	73	0.869497	0.611791	0.0132955	0.00205225	0.0661725	0.0251395	0.125567
CGI537	Heatr7b1	1	90137793	90138303	310	+	11	0.491669	0.545161	0.164416	0.241843	0.616633	0.0655501	0.792778
CGI538	Heatr7b1	1	90149369	90150276	707	+	14	0.280452	0.54314	0.510304	0.429774	0.761275	0.217807	0.703177
CGI539	Heatr7b1	1	90151338	90151726	188	+	7	0.37008	0.638298	0.0912912	0.0432051	0.914028	0.122812	0.855748	Sperm-methylated, gDMR
CGI540	A730008H23Rik, Hjurp	1	90173355	90174775	1220	+	59	0.692657	0.528689	0.106289	0.0388504	0.0581406	0.0230194	0.0727797
CGI541		1	90174622	90175254	432	+	12	0.417956	0.516204	0.0993464	0.0486815	0.0419342	0.0117038	0.631364
CGI542		1	90182827	90183926	899	+	22	0.360217	0.525028	0.079543	0.0487564	0.250723	0.111856	0.696782
CGI543	Arl4c	1	90597236	90599437	2001	+	178	0.860764	0.644678	0.0237978	0.0238063	0.0640957	0.0167982	0.0214004
CGI544		1	90602323	90602811	288	+	13	0.594469	0.552083	0	0.000740741	0.0213675	0.0563421	0.00757576
CGI545	Sh3bp4	1	90966385	90967976	1391	+	122	0.782095	0.670022	0.0204082	0	0.0550843	0.0170339	0.0219907
CGI546		1	91199199	91199769	370	+	19	0.658052	0.559459	0.838467	0	0.0118915	0.166208	0.614683	Oocyte-methylated, gDMR
CGI547	Agap1	1	91350401	91352898	2297	+	219	0.902385	0.65172	0.0301344	0.0284314	0.0400343	0.0281567	0.00980392
CGI548	Agap1	1	91476367	91478797	2230	+	249	0.89712	0.70583	0.0236689	0.0833333	0.0934066	0.0212264	0.0824742
CGI549	Agap1	1	91540603	91540976	173	+	8	0.602618	0.560694	0.777778	0	0.923077	0.256492	0.516667	Sperm-methylated
CGI550		1	91819338	91820353	815	+	44	0.574594	0.629448	0.0145609	0	0.00872093	0.0202204	0.0467896
CGI551		1	91823406	91824290	684	+	39	0.635831	0.599415	0.0397727	0.0769231	0.0294118	0.0240033	0.0408163
CGI552	Gbx2	1	91825101	91825763	462	+	28	0.696244	0.590909	0.454975	0.0901503	0.0623698	0.115925	0.227865
CGI553	Gbx2	1	91826363	91828617	2054	+	187	0.851969	0.654333	0.0286607	0.0399263	0.051082	0.0187744	0.0202381
CGI554		1	91828510	91828992	282	+	14	0.754964	0.51773	0	0.00273	0.0151	0.0151263	0.0921569
CGI555		1	91830236	91830619	183	+	16	1.03592	0.584699	0.0144231	0	0.0477778	0.0122641	0.0277778
CGI556		1	91836123	91836570	247	+	7	0.468564	0.493927	0	0	0.0220588	0.026634	0.0697917
CGI557		1	91836826	91837378	352	+	20	0.543625	0.647727	0.000805153		0.0132231	0.00906355	0.0238095
CGI558		1	91838039	91839030	791	+	52	0.753294	0.597977	0.0271739	0.0481151	0.0681995	0.0224946	0.0189042
CGI559	Asb18	1	91864191	91865884	1493	+	115	0.842818	0.604823	0.0248606	0	0.0391209	0.0168674	0.0763072
CGI560	Asb18	1	91888344	91890000	1456	+	77	0.615412	0.590659	0.0221159		0.0247331	0.0194539	0.263219
CGI561	Asb18	1	91903130	91903563	233	+	12	0.616341	0.579399	0.00145349	0.00222222	0.172333	0.00529101	0.518271
CGI562	Cxcr7	1	92100333	92100807	274	+	12	0.51961	0.583942	0.994444	0	0.166667	0.0969169	0.101175	Oocyte-methylated, gDMR
CGI563		1	92118714	92119066	152	+	10	0.978303	0.526316	0.0239237	0.0178571	0.850932	0.0492709	0.295906	Sperm-methylated, gDMR
CGI564	Cops8	1	92499592	92500529	737	+	67	1.03189	0.598372	0.0205686	0.0152985	0.0399138	0.0132418	0.0294643
CGI565	Mlph	1	92811338	92811830	292	+	16	0.533522	0.643836	0.0745726	0	0.0583333	0.0344091	0.155797
CGI566	Mlph	1	92824685	92825056	171	+	8	0.460216	0.649123	0	0	0.0763889	0.0141827	0.0277778
CGI567	Lrrfip1	1	92894745	92896168	1223	+	96	0.767399	0.6435	0.042581	0.0295699	0.00447552	0.134061	0.0713955
CGI568	Lrrfip1	1	92948987	92950405	1218	+	80	0.658697	0.639573	0.0130985	0	0.0201613	0.0145754	0.0378043
CGI569	Rbm44	1	93041323	93041847	324	+	16	0.582639	0.58642	0.0057971	0.047619	0.0574074	0.00474701	0.191667
CGI570	Ramp1	1	93076098	93077111	813	+	48	0.550466	0.655597	0.0198737	0	0.0332874	0.0269718	0.107073
CGI571	Ube2f	1	93146373	93147768	1195	+	105	0.837061	0.651046	0.958568	0	0.0123457	0.0626813	0.0133824	Oocyte-methylated, gDMR
CGI572	Scly	1	93194366	93195433	867	+	64	0.752861	0.627451	0.0176216	0.0588235	0	0.0165051	0.041369
CGI573	Espnl	1	93240926	93242574	1448	+	113	0.677804	0.678867	0.0325185	0	0.154667	0.0254517	0.248299
CGI574	Fam132b	1	93262427	93263764	1137	+	73	0.649427	0.633245	0.0561679	0.0263158	0.014896	0.0166909	0.0997835
CGI575	Ilkap	1	93294440	93295831	1191	+	104	0.853363	0.640638	0.0270385	0.03	0.0563842	0.0174853	0.00608044
CGI576		1	93302332	93302868	336	+	18	0.545018	0.627976	0	0.00539773	0.0271242	0.0154293	0.225758
CGI577	Hes6	1	93308459	93311238	2579	+	159	0.640169	0.625048	0.031889	0	0.0186589	0.0135701	0.0261104
CGI578	Per2	1	93355054	93356598	1344	+	108	0.812108	0.631696	0.0283815	0.00483092	0.0493827	0.0336982	0.0643471
CGI579	Traf3ip1	1	93390678	93392076	1198	+	90	0.891716	0.613523	0	0.0333333	0.035756	0.0252518	0.0368217
CGI580	Asb1	1	93436242	93438091	1649	+	103	0.668766	0.612492	0.0681214	0.000862069	0.0603495	0.0212148	0.0355932
CGI581	Twist2	1	93696980	93699442	2262	+	161	0.718796	0.629531	0.0311427	0.0271744	0.00757576	0.0276697	0.0540625
CGI582		1	94075805	94077929	1924	+	190	0.933388	0.651247	0.016741	0	0.023778	0.0116469	0.0291291
CGI583	Ndufa10	1	94369556	94370897	1141	+	76	0.800879	0.57844	0.07918	0.0416667	0.0385352	0.043676	0.017138
CGI584	Myeov2	1	94537744	94539037	1093	+	63	0.690588	0.5828	0.0373967	0.0448718	0.0369927	0.0296663	0.0550847
CGI585	Gpc1	1	94727238	94729600	2162	+	173	0.721839	0.666975	0.01067	0.00980392	0.0480306	0.0281394	0.0496885
CGI586	Gpc1	1	94744942	94745528	386	+	25	0.619244	0.676166	0.793086	0	0.123818	0.370768	0.0875377
CGI587	Ankmy1	1	94775739	94776096	157	+	9	0.594009	0.630573		0	1	0.317504	0.925253
CGI588	Ankmy1	1	94799380	94799991	411	+	14	0.428468	0.56691	0.0769231	0	0.0952381	0.0357633	0.448889
CGI589	Dusp28	1	94803237	94804423	986	+	87	0.830777	0.653144	0.0303493	0.0426462	0.0319767	0.0135072	0.142424
CGI590	Rnpepl1	1	94806885	94808637	1552	+	151	0.835464	0.684923	0.0324028	0.03125	0.0684807	0.0388256	0.0786667
CGI591	Capn10	1	94830508	94831812	1104	+	80	0.826292	0.593297	0.0136751	0.00483092	0.0761111	0.0171822	0.0151515
CGI592	Kif1a	1	94968114	94968540	226	+	10	0.881228	0.530973	0.0881862	0	0.931397	0.0595435	0.693667	Sperm-methylated, gDMR
CGI593	Kif1a	1	94996646	94998910	2064	+	117	0.56206	0.637112	0.0336538	0.0375	0.048913	0.0384235	0.100399
CGI594		1	95072887	95073741	654	+	41	0.583831	0.655963	0.00441176	0	0.0753968	0.0445102	0.130864
CGI595		1	95120411	95121000	389	+	18	0.529415	0.596401	0.0722222	0	0.18127	0.0227542	0.076933
CGI596	Sned1	1	95131893	95133472	1379	+	103	0.711141	0.649021	0.0244966	0.015625	0.145833	0.024716	0.0181818
CGI597	Mterfd2	1	95202018	95202810	592	+	33	0.643719	0.594595	0.129075	0.0210377	0.0280506	0.0426648	0.0684704
CGI598	Ppp1r7	1	95238966	95240877	1711	+	121	0.78578	0.600234	0.0329717	0.00213675	0.0373225	0.0216945	0.0342605
CGI599	Ano7	1	95290826	95291352	326	+	18	0.639789	0.588957	0.1047	0.00243846	0.0769231	0.0180156	0.680769
CGI600	Ano7	1	95297721	95298651	730	+	37	0.557809	0.60411	0	0	0.0330882	0.0151901	0.0977687
CGI601	Hdlbp	1	95341323	95342697	1174	+	100	0.780462	0.66184	0	0.00190329	0.0478111	0.0145995	0.03258
CGI602	Hdlbp, Sept2	1	95374575	95376372	1597	+	115	0.742193	0.623669	0.0204128	0.0322581	0.0515931	0.0222149	0.0153986
CGI603	Farp2	1	95408003	95409372	1169	+	87	0.694604	0.658683	0	0	0.0238095	0.0175834	0.0606061
CGI604	Stk25	1	95531382	95532881	1299	+	111	0.810502	0.65358	0.0186091	0	0.0151888	0.028641	0.0206931
CGI605		1	95565360	95565789	229	+	12	0.657155	0.567686	1	0	0.030303	0.121852	0	Oocyte-methylated, gDMR
CGI606	Bok	1	95581886	95583611	1525	+	129	0.802913	0.650492	0.171102	0.0182466	0.0671454	0.0296352	0.025641
CGI607	Atg4b, Thap4	1	95650270	95652170	1700	+	199	0.942254	0.705294	0.0264041	0.025641	0.0266361	0.0230569	0.0322129
CGI608	Dtymk	1	95698082	95698969	687	+	52	0.988836	0.554585	0.0241902	0.0212817	0.036048	0.0127888	0
CGI609	Ing5	1	95699912	95701395	1283	+	109	0.821469	0.643804	0.0301128	0	0.0426829	0.0296987	0.0434028
CGI610	D2hgdh	1	95721353	95722360	807	+	39	0.60752	0.578686	0.0240621	0	0.0580269	0.0189421	0.037861
CGI611	D2hgdh	1	95722847	95723336	289	+	15	0.588481	0.598616	0.98	0.00506073	0.1375	0.179064	0.497333	Oocyte-methylated, gDMR
CGI612	Neu4	1	95918913	95919637	524	+	19	0.407277	0.597328	0.29455	0.0153883	0.142857	0.123856	0.520238
CGI613		1	95931752	95932165	213	+	9	0.528407	0.591549	0	0.0695136	0.0270761	0.017139	0.0416667
CGI614	Fam174a	1	97209905	97211053	948	+	85	0.785444	0.67616	0.0206595	0.0909091	0.0487805	0.0185267	0
CGI615	St8sia4	1	97563793	97564917	924	+	59	0.830645	0.555195	0.019625	0	0.066376	0.0141078	0.0269157
CGI616		1	98160734	98161213	279	+	15	0.954558	0.494624	0.06875	0	0.037037	0.0214744	0.833333
CGI617	Slco4c1	1	98768341	98769182	641	+	37	0.624959	0.608424	0.00595238	0.00295312	0.0267857	0.0109114	0.0111111
CGI618	D1Ertd622e	1	99556970	99559217	2047	+	207	0.903813	0.671226	0.0385158	0.0248935	0.0357143	0.0268969	0.023353
CGI619	Ppip5k2, Gin1	1	99665706	99667379	1473	+	106	0.881535	0.571623	0.0319076	0	0.0286178	0.0135026	0.0260122
CGI620	Pam	1	99873245	99874112	667	+	49	0.757687	0.623688	0.0266776	0.0769231	0.0223251	0.033052	0.0652174
CGI621	Pam	1	99991290	99992996	1506	+	109	0.70442	0.641434	0.0134409	0	0.0543193	0.0198	0.0203008
CGI622	Cdh20	1	106664907	106666129	1022	+	52	0.56688	0.60274	0.0252814	0.0347826	0.0208333	0.0163181	0.00882353
CGI623	Cdh20	1	106881160	106881523	163	+	11	0.728034	0.619632	0.998291	0.0105856	0.0501411	0.189643	0.434602	Oocyte-methylated, gDMR
CGI625	Cdh20	1	106890310	106891154	644	+	53	0.853688	0.622671	0.670647	0	0.00816993	0.206265	0.143374
CGI626	Rnf152	1	107252263	107253698	1235	+	86	0.647724	0.65749	0.00625761	0	0.0759563	0.0226962	0.0322751
CGI627	2310035C23Rik, Pign	1	107559733	107561507	1574	+	108	0.710633	0.625794	0.000426257	0.0102814	0.0554103	0.0147652	0.0089364
CGI628		1	107660671	107661127	256	+	18	0.679905	0.644531	0.0454545	0	0.00625	0.257773	0.629705
CGI629	Tnfrsf11a	1	107676622	107677965	1143	+	85	0.740369	0.63692	0.0113696	0	0.0719152	0.0205406	0.080007
CGI630	Tnfrsf11a	1	107710067	107710557	290	+	15	0.597134	0.589655	0.0142857	0	0.05	0.0670242	0.602899
CGI631	Tnfrsf11a	1	107740982	107741663	481	+	27	0.549325	0.640333	0.0292398	0	0.032967	0.0259487	0.0854563
CGI632		1	107777546	107777957	211	+	12	0.532341	0.663507	0.478922	0	0.0357143	0.0262279	0.345092
CGI633	Zcchc2	1	107886193	107888728	2335	+	241	0.897974	0.678373	0.0250756	0.0496264	0.0360735	0.0407034	0.020202
CGI634	Zcchc2	1	107889967	107890797	630	+	42	0.733418	0.609524	0.0289855	0.0326389	0.0229885	0.00591583	0
CGI635	Phlpp1	1	108067834	108070207	2173	+	253	0.950123	0.700414	0.00657895	0	0.0141093	0.0234825	0.0208333
CGI636	Bcl2	1	108608819	108609617	598	+	33	0.588305	0.615385	0.0322581	0	0.0284646	0.0155484	0.266327
CGI637	Bcl2	1	108610074	108611591	1317	+	118	0.849914	0.649962	0.0287037	0	0.0163049	0.0183096	0.0541667
CGI638	Kdsr	1	108655684	108656801	917	+	65	0.768499	0.608506	0.0234583	0.0185185	0.030267	0.0235552	0.00491718
CGI639	Vps4b	1	108692607	108693571	764	+	59	0.783595	0.629581	0.030303	0.0398374	0.19335	0.059424	0.0260417
CGI640		1	111878758	111880118	1160	+	70	0.678313	0.600862	0.0692034	0	0.0259259	0.020641	0
CGI641		1	113651053	113651423	170	+	8	0.498378	0.623529	0	0	0.440659	0.134787	0.258929
CGI642	Dsel	1	113760789	113761816	827	+	66	0.707052	0.673519	0.0629846	0	0.0380952	0.00592569	0.00560224
CGI643		1	114312900	114313782	682	+	36	0.612741	0.587977	0.017284	0.03125	0.0561905	0.0216966	0.0573362
CGI644		1	117581179	117581545	166	+	10	0.826354	0.542169	0.2	0	0.0824515	0.0444444	0.0632184
CGI645	Tsn	1	120207248	120208253	805	+	67	0.855248	0.624845	0.0463773	0.0397508	0.108378	0.0124424	0.00841165
CGI646	Mki67ip	1	120218163	120218983	620	+	44	0.867927	0.575806	0.0156535	0	0.0677896	0.00788568	0.0115132
CGI647	Clasp1	1	120285144	120286456	1112	+	67	0.809438	0.546763	0.0368808	0.0133562	0.0292575	0.0123175	0.0102708
CGI648	Clasp1	1	120286435	120286932	297	+	16	0.613649	0.609428	0.0236099	0	0.0340909	0.0181089	0
CGI649	Clasp1	1	120355654	120356675	821	+	50	0.745863	0.572473	0.0418745	0	0.0173859	0.0311822	0.0025
CGI650	Tcfcp2l1	1	120524195	120525131	736	+	50	0.64934	0.648098	0.027328	0	0.00446623	0.0192563	0.00965142
CGI651	Gli2	1	120733759	120734749	790	+	51	0.633815	0.644304	0.653776	0.0440849	0.435125	0.221574	0.632857
CGI652	Gli2	1	120944081	120944955	674	+	55	0.800696	0.642433	0.0361563	0	0.0128268	0.0185476	0.00520833
CGI653	Gli2	1	120948442	120951119	2477	+	140	0.634434	0.597093	0.0336245	0.0236014	0.0362773	0.0261908	0.0131784
CGI654		1	121085896	121086583	487	+	25	0.582036	0.595483	0.0297101		0.153801	0.128699	0.217308
CGI655	Inhbb	1	121316324	121319788	3264	+	294	0.777053	0.681066	0.0332927	0	0.0633447	0.0276062	0.0399666
CGI656	Ralb	1	121400796	121401800	804	+	57	0.691457	0.643035	0.0206371	0	0.00854701	0.0217053	0.00555556
CGI657	Tmem185b	1	121422093	121423695	1402	+	104	0.706545	0.653352	0.275273	0.0119861	0.105392	0.0401935	0.106816
CGI658	Epb4.1l5	1	121538973	121539359	186	+	10	0.641528	0.580645	1		0.9375	0.343778	0.195914	Oocyte and sperm-methylated
CGI659	Epb4.1l5	1	121544715	121545906	991	+	87	0.852934	0.643794	0.0246597	0.00403226	0.137887	0.0187473	0.0412186
CGI660	Ptpn4	1	121733246	121734574	1128	+	109	0.884314	0.662234	0.0166537	0.0109329	0.0279245	0.0106934	0.0130719
CGI661	Tmem177	1	121809547	121810113	366	+	27	0.843325	0.598361	0.0339988	0	0.0226575	0.00822326	0.00357143
CGI662		1	121893553	121894003	250	+	18	0.825671	0.592	0.00189394		0.0105263	0.0117407	0.0026455
CGI663	Sctr	1	121903633	121904344	511	+	27	0.626316	0.590998	0.0145089	0	0.00347222	0.0179925	0.0352273
CGI664	Sctr	1	121918596	121918951	155	+	10	0.752927	0.6	0.0126492	0	0.952381	0.248452	0.602671	Sperm-methylated, gDMR
CGI665	Tmem37	1	121969556	121970932	1176	+	63	0.647381	0.57568	0.869002	0	0.0474638	0.150389	0.0434603	Oocyte-methylated, gDMR
CGI666	3110009E18Rik, Dbi	1	122017214	122018286	872	+	56	0.791005	0.571101	0.0102273	0.0588235	0.0458226	0.0227126	0.00793586
CGI667	Steap3	1	122161405	122162255	650	+	36	0.551618	0.635385	0.0302339	0.0426829	0.047619	0.0243568	0
CGI668	C1ql2	1	122236636	122239467	2631	+	183	0.697486	0.631699	0.0282494	0.0219698	0.0183642	0.0670123	0.0306122
CGI669		1	122365573	122365934	161	+	8	0.65656	0.552795	0.17591	0	0.367677	0.0269919	0.285714
CGI670		1	122492410	122493678	1068	+	51	0.65884	0.544007	0.0633314	0.00520833	0.060083	0.0220662	0.0630631
CGI671		1	122496279	122496902	423	+	27	0.835625	0.560284	0.0237514	0	0.0170455	0.025966	0.0952381
CGI672	En1	1	122498584	122500767	1983	+	159	0.833803	0.620777	0.0157424	0.0555556	0.0176097	0.0169565	0.0310764
CGI673	En1	1	122501217	122501929	512	+	26	0.562621	0.601562	0.0256996	0.0769231	0.0663987	0.0196276	0.238776
CGI674	En1	1	122503126	122504096	770	+	47	0.687937	0.597403	0.0047619	0	0.0605366	0.0431251	0.09922
CGI675		1	122510083	122510525	242	+	12	0.552282	0.603306	0.0555506	0	0.0417863	0.0056391	0.220545
CGI676		1	122510781	122511306	325	+	16	0.569935	0.590769	0.00506292	0	0.0190476	0.0165043	0.0267857
CGI677		1	123074357	123074965	408	+	31	0.770483	0.629902	0.0211765	0	0.0302981	0.0408189	0.141667
CGI678	Insig2	1	123223860	123224920	860	+	56	0.652883	0.637209	0.0124077		0.00348432	0.0355354	0.0279813
CGI679	Ccdc93	1	123327406	123328513	907	+	44	0.487517	0.631753	0.0416667	0.0625	0.0294486	0.0151025	0.0277778
CGI680	Htr5b	1	123423727	123425333	1406	+	85	0.709805	0.583926	0.0465208	0.0367932	0.0702276	0.0911588	0.139418
CGI681	Ddx18	1	123464019	123464957	738	+	50	0.799422	0.582656	0.0416667	0.0444444	0.0303452	0.02182	0.00205761
CGI682		1	124253604	124254012	208	+	14	0.777796	0.591346	0.138577	0.0561994	0.0960087	0.101877	0.779731
CGI683	Dpp10	1	125941477	125942995	1318	+	83	0.602085	0.647193	0.16571	0	0.0138889	0.054317	0.118913
CGI684	Actr3	1	127331133	127332829	1496	+	102	0.68544	0.632353	0.040328	0.08	0.0919139	0.0133123	0.0125731
CGI685	Slc35f5	1	127456646	127458244	1398	+	95	0.654934	0.65093	0.0294073	0	0.0464845	0.0159633	0.046133
CGI686	Lypd1	1	127807646	127809523	1677	+	103	0.648251	0.617174	0.0762409	0	0.0395833	0.0248857	0.0244565
CGI687	Nckap5	1	128389005	128389508	303	+	21	0.615095	0.673267	0.961538	0.0393912	0.00961538	0.359182	0.118132	Oocyte-methylated, gDMR
CGI688	Mgat5	1	129101304	129103326	1822	+	115	0.65895	0.622942	0.0422535	0.0135135	0.0467172	0.0180306	0.0522676
CGI689	Tmem163	1	129573147	129575098	1751	+	124	0.704052	0.634495	0.0238751	0.0122881	0.0372618	0.0216965	0.121832
CGI690	Ccnt2	1	129670306	129671614	1108	+	96	0.910447	0.620036	0.00257732	0.0294118	0.026715	0.0122273	0.0203923
CGI691	Rab3gap1	1	129765096	129765928	632	+	39	0.715443	0.593354	0.0355667	0.185185	0.0451251	0.0146179	0.0705079
CGI692	R3hdm1	1	129999349	130000741	1192	+	89	0.830768	0.599832	0.0112613	0.0263158	0.0388622	0.0161279	0.0121408
CGI693	Ubxn4	1	130140414	130141626	1012	+	87	0.88117	0.625494	0.0391324		0.0385368	0.0103693	0.0248016
CGI694	Mcm6	1	130255702	130256607	705	+	63	0.942532	0.619858	0.0189469	0	0.0232639	0.0129887	0
CGI695	Dars	1	130313167	130314235	868	+	67	0.792151	0.626728	0.0222427	0	0.0263566	0.0198986	0
CGI696		1	130368969	130369345	176	+	9	0.648373	0.579545	0.720979	0	0.012987	0.202697	0.0420952
CGI697	Cxcr4	1	130487261	130489197	1736	+	106	0.772486	0.56394	0.0127583	0.0163934	0.0420131	0.0226708	0.0250809
CGI698		1	130489601	130490015	214	+	14	0.73758	0.607477	0	0.0465839	0.103175	0.00746142	0
CGI699	Thsd7b	1	131169594	131170497	703	+	41	0.548986	0.657183	0	0	0	0.038952	0.037963
CGI700	Thsd7b	1	131491956	131492340	184	+	8	0.474373	0.608696	0.052381		0	0.0855757	0.769231
CGI701	Cd55	1	132358692	132359487	595	+	41	0.6772	0.638655	0	0	0.0797101	0.0133501	0
CGI702	Pfkfb2	1	132611990	132612686	496	+	33	0.617743	0.659274	0.052381	0	0.0507246	0.0195673	0
CGI703	Yod1	1	132613049	132614657	1408	+	100	0.754485	0.614347	0.241281	0	0.0233827	0.0346455	0.0116505
CGI704	Faim3	1	132774467	132775242	575	+	40	0.683438	0.64	0.0119734	0	0.0333333	0.0171781	0.0830201
CGI705	Mapkapk2	1	132993175	132994748	1373	+	132	0.832529	0.682447	0.0263158	0	0.0283942	0.0172541	0.0395107
CGI706	Dyrk3	1	133034173	133035367	994	+	88	0.855915	0.643863	0.0143592	0.0134639	0.0225048	0.0170387	0
CGI707	Lgtn	1	133049451	133050016	365	+	24	0.76013	0.589041	0.00246305	0	0.0220714	0.0123037	0.0383333
CGI708	Rassf5	1	133096280	133096691	211	+	10	0.609735	0.559242	0.977778	0.0588235	0.113562	0.185376	0.380272	Oocyte-methylated, gDMR
CGI709	Rassf5	1	133140574	133142520	1746	+	127	0.725518	0.633448	0.00732632	0.0232558	0.0819587	0.0332803	0.0607345
CGI710	Ikbke	1	133172199	133172553	154	+	7	0.604819	0.551948	0.0107249		0	0.0333312	0.384615
CGI711	Fam72a, Srgap2	1	133421658	133425318	3460	+	225	0.711579	0.60896	0.12342	0.0388501	0.0153225	0.0266986	0.017165
CGI712		1	133451791	133452215	224	+	11	0.818198	0.491071	0		0.111111	0.115741	0.125
CGI713	Avpr1b	1	133496403	133496814	211	+	10	0.550662	0.592417	0.227273		0	0.0130089	0.5977
CGI714	Pm20d1	1	133693916	133694436	320	+	19	0.630589	0.615625	0.0438655	0	0.0595238	0.0132727	0
CGI715	Slc41a1	1	133723747	133725216	1269	+	76	0.636449	0.613869	0.020516	0.130435	0.0403646	0.0188974	0.00609628
CGI716	Rab7l1	1	133763611	133764619	808	+	46	0.68686	0.579208	0.0296922	0.0659091	0.0132748	0.0154355	0.040991
CGI717	Nucks1	1	133806705	133808324	1419	+	125	0.859923	0.640592	0.0807559	0.0191761	0.0154207	0.0192987	0.0245608
CGI718		1	133858974	133860724	1550	+	116	0.724519	0.643871	0.0535714	0	0.037037	0.0221796	0.0241935
CGI719	Elk4	1	133903707	133905251	1344	+	129	0.903898	0.656994	0.020961	0.021978	0.00534473	0.0231464	0.00666667
CGI720	Mfsd4	1	133963803	133965019	1016	+	81	0.760427	0.648622	0.155532	0	0.022019	0.0454162	0.167857
CGI721	Cdk18	1	134013130	134013548	218	+	11	0.643443	0.568807	0.0494739	0	0.0615924	0.0924443	0.222214
CGI722	Cdk18	1	134035228	134036507	1079	+	62	0.624528	0.609824	0.0271055		0.0444444	0.0354014	0.0241667
CGI723	Lemd1	1	134086387	134088480	1893	+	164	0.82409	0.653988	0.0123839	0	0.0968439	0.0195108	0.0383142
CGI724	Lemd1	1	134108887	134109259	172	+	12	1.05064	0.523256	0.0500464	0.00529978	0.0333333	0.0191871	0
CGI725	Klhdc8a	1	134194819	134196376	1357	+	111	0.748451	0.662491	0.0344571	0.0727273	0.0596682	0.026357	0.126639
CGI726	Nuak2	1	134212337	134213340	803	+	68	0.881808	0.620174	0.0196243	0	0.0669878	0.00780285	0.0497062
CGI727	Tmcc2	1	134256973	134257722	549	+	35	0.693821	0.608379	1	0.0014245	0.338294	0.269846	0.574685	Oocyte-methylated
CGI728	Tmcc2	1	134277136	134277715	379	+	24	0.590525	0.662269	0.95625	0.0571429	0.431373	0.231194	0.315789	Oocyte-methylated
CGI729	Tmcc2	1	134287279	134288781	1302	+	104	0.761154	0.648233	0.031746	0	0.0502409	0.0266786	0.0345238
CGI730	Dstyk	1	134313698	134314895	997	+	88	0.834322	0.660983	0.0556237	0	0.00895432	0.0139988	0.0181578
CGI731	Rbbp5	1	134373443	134374379	736	+	44	0.825751	0.543478	0.0319444	0.0193237	0.0543091	0.0216275	0.0366058
CGI732	Cntn2	1	134415196	134415579	183	+	11	0.709699	0.590164	0.995918	0.0625	0.977778	0.304192	0.74304	Oocyte and sperm-methylated
CGI733	Cntn2	1	134439173	134439789	416	+	26	0.577504	0.661058	0.666786	0.0769231	0.0227273	0.259329	0.0448718
CGI734	Nfasc	1	134637656	134638742	886	+	54	0.645179	0.623025	0.0292398	0	0.018981	0.0143814	0.186221
CGI735		1	134655197	134655613	216	+	12	0.606723	0.611111	0.0125	0.0576923	0.0833333	0.0409612	0.0323413
CGI736	Lrrn2	1	134776356	134778378	1822	+	115	0.616279	0.64764	0.0125448	0.00790816	0.0572139	0.0294161	0.0340979
CGI737	Lrrn2	1	134834687	134835428	541	+	23	0.466421	0.606285	0.0214359	0.0568047	0.0166667	0.0175752	0.559722
CGI738	Mdm4	1	134921433	134922186	553	+	36	0.697467	0.629295	0.874486		0.00574967	0.104129	0.0130116	Oocyte-methylated, gDMR
CGI739	Pik3c2b	1	134942103	134943598	1295	+	120	0.838193	0.666409	0.374576	0.0547945	0.0439276	0.0648965	0.0106383
CGI740	Ppp1r15b	1	135027463	135028809	1146	+	104	0.868485	0.647469	0.0252551	0.00204082	0.0227398	0.0140515	0.0206107
CGI741	Ppp1r15b	1	135028856	135029284	228	+	9	0.488861	0.570175	0.217832	0	0.399573	0.0403426	0.068
CGI742		1	135060131	135061502	1171	+	94	0.757419	0.65158	0.0506833	0	0.0342898	0.0177462	0.0359551
CGI743		1	135077899	135078376	277	+	15	0.551594	0.642599	0	0	0.0147059	0.0394141	0.00666667
CGI744		1	135078810	135079576	566	+	29	0.499804	0.64311	0.0769231	0	0.056	0.140572	0.0645161
CGI745	Kiss1	1	135225522	135226440	718	+	36	0.582974	0.587744	0.0201183	0.0128205	0.0252525	0.0165864	0.130175
CGI746	Etnk2	1	135259863	135261174	1111	+	76	0.641365	0.653465	0.000861944		0.0227609	0.0147649	0.01875
CGI747	Sox13	1	135284536	135284979	243	+	10	0.589097	0.604938	0.0357143	0	0.963035	0.0964808	0.388831	Sperm-methylated, gDMR
CGI748	Sox13	1	135319209	135321382	1973	+	188	0.813468	0.684744	0.0344152	0.0390836	0.0699405	0.0123343	0.0103093
CGI749		1	135389491	135389915	224	+	15	0.860987	0.5625	0.0940459	0.00680272	0.0174242	0.0290691	0.04
CGI750	Snrpe	1	135506172	135507190	818	+	77	0.942929	0.640587	0.0184615	0	0.0298478	0.0251549	0.0324238
CGI751	Zc3h11a, Zbed6	1	135556954	135557403	249	+	11	0.653372	0.522088	0.7		0.113051	0.0417044	0.03166
CGI752	Zc3h11a, Zbed6	1	135557350	135558239	689	+	49	0.734682	0.625544	0.0340136	0	0.0241108	0.0223816	0
CGI753	Atp2b4	1	135632708	135633082	174	+	9	0.643404	0.568966	1	0	0.97648	0.363148	0.0769944	Oocyte and sperm-methylated
CGI754		1	135697151	135697574	223	+	11	0.498795	0.632287	0		0.109722	0.0163561	0.0238095
CGI755		1	135697527	135697905	178	+	11	0.742482	0.601124	0	0	0.0333333	0.00944444	0
CGI756		1	135804893	135805777	684	+	39	0.606747	0.627193	0.037037	0.0455686	0.0214286	0.00649351	0.148065
CGI757	Fmod	1	135942949	135943435	286	+	20	0.709001	0.629371	0.0738095	0	0.0277778	0.0659039	0.244444
CGI758		1	135957395	135958116	521	+	25	0.505757	0.621881	0.0640862	0	0.063	0.126247	0.0348485
CGI759		1	135959604	135960073	269	+	15	0.613645	0.605948	0.151515		0	0.0387006	0.136364
CGI760	Btg2	1	135975190	135976275	885	+	70	0.782104	0.637288	0.01732	0.032998	0.0227629	0.0208784	0.0426829
CGI761		1	135989292	135990238	746	+	42	0.598559	0.613941	0.0150914	0.05	0	0.0139373	0
CGI762	Adora1	1	136130650	136132609	1759	+	92	0.555377	0.616828	0.0858586	0	0.0873016	0.0305302	0.177917
CGI763		1	136140654	136141109	255	+	15	0.647128	0.607843	0.010101	0	0.0925926	0.0334478	0.0922222
CGI764	Ppfia4	1	136194886	136196346	1260	+	71	0.580387	0.626984	0.945335	1	0.113895	0.170925	0.288931	Oocyte-methylated, gDMR
CGI765		1	136240613	136241621	808	+	49	0.596429	0.638614	0.093937	0	0.0425225	0.010483	0.0896645
CGI766	Tmem183a	1	136257815	136258979	964	+	85	0.957342	0.614108	0.0403226	0	0.0185986	0.0209791	0.0237255
CGI767	Cyb5r1	1	136302323	136303082	559	+	38	0.643914	0.654741	0.00580297	0.0258826	0.0345238	0.00306074	0.00925926
CGI768	Adipor1	1	136311517	136312755	1038	+	95	0.855923	0.657033	0.00230415	0.0392183	0.079797	0.0106597	0.00500678
CGI769	Klhl12	1	136351628	136352552	724	+	57	0.735008	0.656077	0.028488	0	0.00582294	0.0237266	0
CGI770	Rabif	1	136390973	136391791	618	+	54	0.819689	0.653722	0.00980392	0	0.0233029	0.00825186	0.0109649
CGI771		1	136409697	136410574	677	+	43	0.707537	0.599705	0.0449193	0.0238095	0.0338654	0.0181573	0.0574901
CGI772		1	136452650	136453737	887	+	59	0.626759	0.656144	0.0768795	0.0625	0.0737272	0.0252829	0.0197131
CGI773	Kdm5b	1	136456363	136458276	1713	+	153	0.766689	0.692353	0.0276316	0.0136986	0.0507835	0.0106614	0.0347203
CGI774	Syt2	1	136542703	136544127	1224	+	97	0.710846	0.668301	0.00109533	0	0.077957	0.022308	0.0398148
CGI775	Syt2	1	136605269	136606360	891	+	57	0.602889	0.652076	0.84395	0	0.0576786	0.30879	0.0899354	Oocyte-methylated, gDMR
CGI776	Syt2	1	136606440	136607022	382	+	17	0.522262	0.596859	1	0.0520082	0.181984	0.258825	0.414881	Oocyte-methylated, gDMR
CGI777	Syt2	1	136643916	136644534	418	+	20	0.637557	0.550239	0.908511	0.00724638	0.120062	0.123231	0.358754	Oocyte-methylated, gDMR
CGI778	Ppp1r12b	1	136851719	136852827	908	+	53	0.640006	0.60793	0.0292186	0.00160256	0.0135802	0.0171495	0.030303
CGI779	Ube2t	1	136858592	136859528	736	+	47	0.774715	0.574728	0.0365087	0.00384615	0.0302817	0.0184603	0.0217949
CGI780	Lgr6	1	136883731	136884957	1026	+	60	0.553639	0.651072	0.975892	0	0.0510204	0.216387	0.183034	Oocyte-methylated, gDMR
CGI781	Lgr6	1	136981815	136982322	307	+	21	0.641292	0.667752	0.00214414	0	0.0272283	0.0167623	0.112397
CGI782	Lgr6	1	137001198	137002266	868	+	64	0.711631	0.652074	0.0476067	0.00634921	0.0693333	0.018035	0.0260417
CGI783	Arl8a	1	137042873	137044594	1521	+	145	0.855083	0.672584	0.00454545	0.0102041	0.00303951	0.0225154	0
CGI784	Gpr37l1	1	137057484	137058020	336	+	14	0.43625	0.619048	0.00302326	0.111111	0.419868	0.113109	0.401282
CGI785	Elf3	1	137154829	137155223	194	+	11	0.604071	0.618557	0.00392157	0	0.0166667	0.0146044	0.0763158
CGI786		1	137155581	137155954	173	+	10	0.732348	0.566474	0	0.0104167	0.103285	0.0236928	0.00438596
CGI787	Rnpep	1	137179684	137181064	1180	+	90	0.711961	0.655085	0.019914		0.00768049	0.01135	0.0143521
CGI788	Timm17a	1	137209776	137210732	756	+	51	0.749594	0.600529	0.01909	0.00101801	0.0312435	0.0115002	0.0123457
CGI789		1	137264821	137265496	475	+	26	0.73931	0.545263	0	0	0.0239583	0.00886615	0
CGI790	Shisa4	1	137270913	137272153	1040	+	52	0.495524	0.641346	0.0133333	0	0.195652	0.0158145	0.0372807
CGI791	Ipo9	1	137326192	137327547	1155	+	84	0.840793	0.599134	0.0181159	0	0.0295641	0.0584819	0.0334568
CGI792	Nav1	1	137406628	137407708	880	+	41	0.576148	0.569318	1	0	0.102929	0.159707	0.00935961	Oocyte-methylated, gDMR
CGI793	Nav1	1	137481054	137482623	1369	+	95	0.705853	0.634039	0.666667		0.0348837	0.135413	0.0533333
CGI794		1	137583799	137585377	1378	+	95	0.713838	0.621916	0.026864	0	0.0523966	0.0244979	0.0214521
CGI795		1	137595465	137596269	604	+	28	0.589752	0.561258	0.0208488	0.0442559	0.13564	0.0180767	0.0365854
CGI796	Csrp1	1	137625494	137626191	497	+	34	0.680467	0.635815	0.942708	0.03137	0.0869565	0.0738915	0.0123874	Oocyte-methylated, gDMR
CGI797	Phlda3	1	137662016	137663655	1439	+	110	0.716905	0.653926	0.0243629	0.04	0.086875	0.100021	0.0504535
CGI798		1	137690206	137690692	286	+	13	0.53255	0.611888	0.0625	0	0.0216783	0.0269709	0.0875534
CGI799	Lad1	1	137714625	137716060	1235	+	83	0.697593	0.621053	0.0282539		0.0446137	0.043034	0.136185
CGI800	Pkp1	1	137814997	137816213	1016	+	74	0.666667	0.661417	0.0405405	0	0.0598639	0.0304304	0.0787732
CGI801		1	137903905	137904573	468	+	25	0.639665	0.57906	0.0130548	0	0.0185185	0.00543056	0.0145833
CGI802	Tmem9	1	137914446	137915002	356	+	21	0.624339	0.648876	0.0185185	0	0.0185366	0.00762015	0.0131579
CGI803		1	137946975	137948440	1265	+	69	0.593277	0.607905	0.0490952	0	0.112542	0.021088	0.0644142
CGI804	Cacna1s	1	138001769	138002603	634	+	33	0.521426	0.632492	0.0404682	0.0344828	0.148077	0.0244208	0.367714
CGI805	Kif21b	1	138027594	138028944	1150	+	85	0.68354	0.658261	0.0416667	0	0.078869	0.0236964	0.0482532
CGI806	Kif21b	1	138036624	138037319	495	+	30	0.616816	0.628283	0.0273438	0	0.0614948	0.0274052	0.0724932
CGI807	5730559C18Rik	1	138112243	138113087	644	+	37	0.551283	0.650621	0.0250247	0	0.0717593	0.0141503	0.421683
CGI808	5730559C18Rik	1	138121736	138122199	263	+	14	0.538469	0.631179	0.00582092		0.806439	0.0848293	0.594408	Sperm-methylated, gDMR
CGI809	5730559C18Rik	1	138130380	138131388	808	+	56	0.708341	0.62995	0.0322581	0	0.0559524	0.0227575	0.0268463
CGI810	Gpr25	1	138155921	138157768	1647	+	138	0.762894	0.663024	0.0198427	0.0105263	0.0306122	0.0201635	0.0271709
CGI811	Camsap1l1	1	138241651	138243392	1541	+	139	0.93914	0.620376	0.0215291	0	0.0456113	0.0300199	0.026455
CGI812	Ddx59	1	138311419	138312443	824	+	78	0.95577	0.629854	0.00518096	0.333333	0.0112686	0.0296836	0
CGI813		1	138362519	138363461	742	+	57	0.830039	0.614555	0.0252358	0.0271739	0.0299758	0.023184	0.0339506
CGI814		1	138501936	138502320	184	+	13	0.964343	0.548913	1	0	0.416133	0.30863	0.543056	Oocyte-methylated
CGI815	Zfp281	1	138520934	138522789	1655	+	134	0.77921	0.646526	0.162794	0.0643863	0.156331	0.037817	0.0444495
CGI816		1	138566981	138567410	229	+	12	0.587495	0.606987	0.0652778	0.0520833	0.466667	0.0426512	0.0588235
CGI817		1	138678186	138678708	322	+	14	0.577528	0.549689	0.015625	0	0.0472222	0.0215972	0.105556
CGI818		1	138685565	138686359	594	+	36	0.776258	0.563973	0	0	0.0529101	0.0204928	0.243712
CGI819	Nr5a2	1	138843672	138844128	256	+	12	0.605665	0.558594	0.9	0.047619	0.0420635	0.270481	0.1375	Oocyte-methylated, gDMR
CGI820	Nr5a2	1	138845044	138846090	846	+	60	0.703723	0.640662	0.970588	0	0.0188621	0.176536	0.0386905	Oocyte-methylated, gDMR
CGI821	Nr5a2	1	138848647	138849925	1078	+	53	0.608632	0.569573	0.00259457	0	0.0327629	0.0191009	0.0385346
CGI822		1	139322315	139322704	189	+	18	1.28963	0.544974	0.6625	0	0.0384615	0.0595238	0.5625
CGI823	Nek7	1	140515505	140516638	933	+	87	0.854135	0.66881	0.00503872	0.0163934	0.0123412	0.0161228	0.0344828
CGI824	Lhx9	1	140727916	140728335	219	+	13	0.82375	0.538813	0	0	0.020944	0	0
CGI825	Lhx9	1	140734808	140735348	340	+	19	0.6357	0.594118	0.0151515	0	0.0833333	0.0337529	0.220884
CGI826	Lhx9	1	140736376	140736927	351	+	14	0.494386	0.57265	0.0947034	0.089881	0.0654762	0.0391343	0.722222
CGI827	Lhx9	1	140737959	140738728	569	+	45	0.82809	0.618629	0.00106376	0.0714286	0.0216726	0.0636313	0.110068
CGI828	Lhx9	1	140739969	140740623	454	+	25	0.664741	0.577093	0.00543478	0	0.0226757	0.0986147	0.003367
CGI829		1	140744536	140745787	1051	+	52	0.547967	0.601332	0	0.047619	0.101064	0.0159628	0.00784314
CGI830	2310009B15Rik	1	140752977	140753641	464	+	55	0.912354	0.728448	0.00093985		0.00588235	0	0
CGI831	Dennd1b	1	140859536	140860985	1249	+	115	0.866131	0.655725	0.0372822	0.027027	0.0693333	0.0206636	0.025641
CGI832	Zbtb41	1	141318163	141319533	1170	+	93	0.816487	0.625641	0.0529896	0.0133622	0.0526316	0.0130457	0.05
CGI833	Aspm	1	141351012	141352238	1026	+	69	0.748923	0.601365	0	0	0.032658	0.0182509	0.0136364
CGI834		1	142142068	142142778	510	+	25	0.594078	0.580392	0.0178571	0	0.0191327	0.0523671	0.0297257
CGI835	Cdc73	1	145549086	145550718	1432	+	135	0.991137	0.624302	0.0212877	0.0368014	0.0282555	0.0207162	0.00983607
CGI836	Glrx2	1	145586244	145587404	960	+	72	0.841343	0.601042	0.0169492	0	0.0510753	0.0184229	0.103876
CGI837	Uchl5, Trove2	1	145623427	145625290	1663	+	136	0.807542	0.636801	0.0899258	0.0554718	0.0127111	0.0288028	0.011237
CGI838	Rgs2	1	145850953	145851812	659	+	54	0.835915	0.629742	0.0047619	0.0483871	0.0645299	0.0238206	0.027027
CGI839		1	146800845	146801221	176	+	8	0.631036	0.539773	0.0238095	0	0.0208333	0.0628618	0.707988
CGI840	Fam5c	1	148344395	148344811	216	+	9	0.53144	0.574074	0.0454545	0	0.0353801	0.0289352	0.0496894
CGI841	Fam5c	1	148344896	148345369	273	+	15	0.564568	0.626374	0	0	0.0367288	0.0312608	0
CGI842	Fam5c	1	148571927	148572296	169	+	28	1.0259	0.816568	0			0.0655937	0
CGI843	Pla2g4a	1	151704414	151704792	178	+	6	0.623713	0.466292	0.0338361	0.666667	0.160784	0.0395663	0.785714
CGI844	Ptgs2	1	151946666	151947551	685	+	33	0.518555	0.610219	0.0257236	0	0.0282651	0.0316264	0.0185185
CGI845	Tpr, BC003331	1	152239709	152241099	1190	+	103	0.854746	0.636975	0.0293278	0	0.0378317	0.0131679	0.0258772
CGI846	Hmcn1	1	152840226	152841023	597	+	36	0.630859	0.619765	0.0620849	0.00315535	0.0249042	0.00596815	0.00285714
CGI847	Ivns1abp	1	153191012	153192709	1497	+	161	0.945381	0.680027	0.0150273	0.0238507	0.0404593	0.0220536	0.0330596
CGI848	1200016B10Rik, 1190005F20Rik	1	153274979	153276394	1215	+	98	0.794883	0.638683	0.0254544	0.0351553	0.0144765	0.0218125	0.0133745
CGI849	Rnf2	1	153347054	153348542	1288	+	145	0.880249	0.716615	0.0015822	0	0.0266419	0.00821544	0.00825397
CGI850		1	153407657	153408026	169	+	10	0.7989	0.556213	0	0	0.077135	0.0212073	0.253094
CGI851	Fam129a	1	153418183	153419081	698	+	43	0.614287	0.63467	0.0246576	0.0253141	0.0878788	0.0300559	0
CGI852	Edem3	1	153601968	153603308	1140	+	88	0.734106	0.653509	0.0187209	0.00784047	0.0185185	0.023882	0.00208333
CGI853	1700025G04Rik	1	153936638	153938481	1643	+	129	0.675875	0.682288	0.0125661	0.002849	0.0306604	0.0125287	0.00819672
CGI854		1	154122048	154122474	226	+	15	0.876239	0.553097	0.217313	0.302895	0.428841	0.172178	0.757937
CGI855	Tsen15	1	154233221	154234101	680	+	58	0.855659	0.632353	0.039412	0.0338983	0.0113095	0.0165974	0.0580808
CGI856	Glt25d2	1	154246832	154247927	895	+	72	0.764633	0.649162	0.391293	0	0.00675676	0.104595	0.0113636
CGI857	Rgl1	1	154471596	154472870	1074	+	67	0.742373	0.580074	0.0666713	0	0.0599301	0.0136038	0.0190972
CGI858		1	154577859	154578214	155	+	4	0.385916	0.529032	0		0.347222	0.0410828	0.266667
CGI859	Arpc5	1	154612933	154614502	1369	+	151	0.942675	0.684441	0.0443038	0.0909091	0.0440425	0.0162044	0.0111111
CGI860	Smg7	1	154748763	154751334	2371	+	200	0.832515	0.640236	0.0269208	0.0103093	0.036451	0.0208146	0.0395539
CGI861		1	154751716	154752088	172	+	7	0.63075	0.511628	0.0216667	0	0.01	0.0259423	0
CGI862	Nmnat2	1	154801841	154803687	1646	+	94	0.681034	0.592953	0.0011674	0.034122	0.0240863	0.0228949	0.0377977
CGI863	Nmnat2	1	154918733	154919106	173	+	12	0.687317	0.641618	0.109091	0	0.0238095	0.063133	0.0294118
CGI864	Lamc2	1	155032800	155033697	697	+	43	0.607154	0.638451	0.00769231	0	0	0.0312354	0
CGI865	Lamc1	1	155178924	155180874	1750	+	138	0.718464	0.670286	0.0400835	0.0160819	0.0603024	0.0152366	0.00639772
CGI866	1700012A16Rik	1	155271909	155272870	761	+	59	0.713609	0.659658	0	0	0.0689655	0.0174464	0.00454545
CGI867	Dhx9	1	155333812	155335125	1113	+	100	0.903818	0.639712	0.0223881	0	0.0965822	0.0156266	0.0265634
CGI868	Npl	1	155396515	155397091	376	+	28	0.751857	0.630319	0.0444444	0	0.118182	0.0120819	0
CGI869	Rgs8	1	155499887	155500483	396	+	18	0.496253	0.616162	0.04	0.0151515	0.0138889	0.0327731	0.221921
CGI870	Rgs16	1	155587193	155587834	441	+	33	0.787968	0.634921	0		0.0378085	0.0135202	0.025034
CGI871	Glul	1	155746693	155748237	1344	+	105	0.760841	0.641369	0.0427335	0.035	0.0246377	0.0137253	0.0135542
CGI872		1	155881135	155881487	152	+	4	0.533589	0.447368	1	0.10175	0.924689	0.262217	0.748661	Oocyte and sperm-methylated
CGI873		1	156051693	156052884	991	+	68	0.6938	0.633703	0.0468883	0.0249536	0.0357143	0.0261853	0.0922705
CGI874	Cacna1e	1	156245411	156246107	496	+	20	0.431276	0.616935	0.995032	0.040512	0.0178571	0.279912	0.77723	Oocyte-methylated, gDMR
CGI875	Cacna1e	1	156572688	156573201	313	+	23	0.873814	0.58147	0.0637615	0.037037	0.0333333	0.0131766	0.235132
CGI876		1	156573464	156574528	864	+	45	0.61364	0.585648	0.00593226	0	0.0183522	0.0604567	0.0497382
CGI877		1	156646223	156646922	499	+	34	0.577958	0.691383	0.037037	0.0289855	0.0416667	0.0332049	0.358983
CGI878		1	156731352	156731971	419	+	21	0.608279	0.575179	0	0	0.00382653	0.021415	0.41428
CGI879		1	156876184	156876653	269	+	14	0.625009	0.591078	0.0874126	0	0.00694444	0.0609853	0.341854
CGI880		1	156906692	156907117	225	+	12	0.699704	0.622222	0.0909091	0	0.943616	0.105119	0.238847	Sperm-methylated, gDMR
CGI881		1	156929977	156931291	1114	+	90	0.700612	0.679533	0.0161725	0	0.0475962	0.0150556	0.0578102
CGI882	Ier5	1	156945014	156947086	1872	+	165	0.814627	0.658654	0.0171333	0.0400822	0.0232234	0.0263951	0.0207641
CGI883	Stx6	1	157005503	157006649	946	+	89	0.842528	0.673362	0.0102241	0.0641026	0.0680608	0.0108237	0.0153846
CGI884		1	157091011	157092374	1163	+	110	0.779117	0.697334	0.979416	0.04	0.0465116	0.185656	0.0525114	Oocyte-methylated, gDMR
CGI885	Xpr1	1	157263719	157264899	980	+	84	0.738984	0.682653	0	0	0.0226608	0.0173289	0.0380435
CGI886	Acbd6	1	157404824	157406062	1038	+	86	0.791816	0.647399	0.020962	0.0119069	0.0467687	0.014946	0.027027
CGI887		1	157583320	157585504	1984	+	114	0.734055	0.55998	0.0132036	0.0333333	0.0554168	0.0190511	0.0252526
CGI888		1	157587548	157590613	2865	+	190	0.728057	0.606632	0.0158763	0.00979884	0.051834	0.0202743	0.0152359
CGI889	Qsox1	1	157659262	157660698	1236	+	85	0.706715	0.627832	0.0120566	0.0440252	0.0127581	0.0182688	0.0448996
CGI890	Cep350	1	157819574	157821034	1260	+	104	0.731831	0.673016	0.0415601	0.07	0.019774	0.0117062	0.00666667
CGI891	Tor1aip1	1	157882416	157883909	1293	+	115	0.820017	0.658933	0.0121778	0.0144804	0.0324683	0.0070424	0.00781609
CGI892	Tor1aip2	1	157887813	157888271	258	+	13	0.676115	0.554264	1		0.161905	0.0736832	0	Oocyte-methylated, gDMR
CGI893	Fam163a	1	158134348	158135517	969	+	63	0.60968	0.654283	0.0416667	0.0588235	0.0530303	0.0248627	0.078629
CGI894	Tdrd5	1	158232818	158234062	1044	+	97	0.872318	0.654215	0.0127587	0.0410959	0.00343583	0.0147741	0.0547794
CGI895	Nphs2	1	158240748	158241458	510	+	34	0.705002	0.635294	0.00130164	0	0.0558559	0.0191893	0.187481
CGI896		1	158350637	158351393	556	+	41	0.823789	0.598921	0.0197044		0.00806452	0.0266072	0.0111111
CGI897	Soat1	1	158403880	158404782	702	+	52	0.713819	0.645299	0.0576402	0.0227273	0.0209365	0.0165167	0.0434783
CGI898	Abl2	1	158488316	158489853	1337	+	118	0.807971	0.677636	0.0390944	0.0253687	0.0403189	0.0144553	0.0367232
CGI899	Tor3a	1	158597270	158597732	262	+	15	0.740161	0.561069	0	0	0.166667	0.025	0
CGI900	Tor3a	1	158603531	158604963	1232	+	62	0.563047	0.598214	0	0.02849	0.0602837	0.0209103	0.120477
CGI901	Fam20b	1	158648328	158649715	1187	+	115	0.889767	0.676495	0.00078125	0	0.0290078	0.0150219	0.0169492
CGI902		1	158678523	158678913	190	+	10	0.577753	0.605263	0.625	0	0.113333	0.223957	0.443182
CGI903		1	158682365	158682803	238	+	9	0.661858	0.483193	0.439878	0.166667	0.0854918	0.0831342	0.128556
CGI904	Ralgps2	1	158868741	158870460	1519	+	180	0.978492	0.697169	0.0282031		0.0554844	0.0449675	0.0161565
CGI905		1	159006394	159006762	168	+	6	0.530631	0.52381	1		0.277778	0.0619827	0.01	Oocyte-methylated
CGI906		1	159007305	159007896	391	+	29	0.831425	0.598465	0.214103	0	0.0109087	0.060991	0.205797
CGI907	Rasal2	1	159341679	159343232	1353	+	147	0.918666	0.688101	0.00992742	0.000419287	0.0600738	0.0102541	0.0292526
CGI908	BC026585	1	159388470	159388859	189	+	11	0.537566	0.666667	0.866667	0	0.0247863	0.091175	0.1	Oocyte-methylated, gDMR
CGI909	Fam5b	1	160285737	160286805	868	+	55	0.7102	0.597926	0.0214026	0	0.0238095	0.0175697	0.0277778
CGI910	Astn1	1	160292549	160293251	502	+	30	0.589525	0.641434	0.0020202	0.6	0	0.0330447	0.0607143
CGI911	Pappa2	1	160866002	160866510	308	+	15	0.605889	0.568182	0.0125	0.01	0.0277778	0.0923086	0.62931
CGI912	Rfwd2	1	161161773	161163281	1308	+	143	1.00093	0.661315	0.0270315		0.0796607	0.018042	0.018035
CGI913	Tnr	1	161600984	161601335	151	+	9	0.666696	0.609272	0.05	0	0.0714286	0.0288698	0.746366
CGI914	4930523C07Rik	1	161974285	161974999	514	+	29	0.573851	0.632296	0.00761905	0	0.0708333	0.0260549	0.0561224
CGI915	Tnn	1	162076002	162076614	412	+	22	0.53394	0.635922	0.028287	0	0.00980392	0.0199771	0.205808
CGI916	Mrps14	1	162124934	162125811	677	+	38	0.651644	0.587888	0.0285544	0.00877193	0.040137	0.0158812	0.00292747
CGI917	Cacybp	1	162142313	162143749	1236	+	111	0.919611	0.625405	0.0215393	0.0108435	0.00572634	0.0120979	0.00280112
CGI918	Rabgap1l	1	162281875	162282354	279	+	12	0.531316	0.587814	0	0	0.647458	0.157285	0.219463
CGI919	Rabgap1l	1	162721955	162723509	1354	+	127	0.82699	0.674298	0.0462443	0.03125	0.068535	0.0188582	0.0182286
CGI920	Rc3h1	1	162836015	162837457	1242	+	111	0.766751	0.690821	0.0154133	0	0.0214286	0.0186816	0.0101078
CGI921	Zbtb37	1	162964262	162965893	1431	+	100	0.758234	0.619846	0.0905483		0.0235174	0.0166934	0.0156646
CGI922	Cenpl, Dars2	1	163000172	163001395	1023	+	62	0.799165	0.55132	0.0316944		0.0602617	0.0209335	0.0233333
CGI923	Klhl20	1	163061082	163061883	601	+	31	0.615138	0.584027	0	0	0.0675223	0.0138256	0.015611
CGI924	Ankrd45	1	163072580	163073256	476	+	29	0.709388	0.588235	0.0401218	0.02	0.0461252	0.00947129	0.136
CGI925	Ankrd45	1	163100623	163101301	478	+	42	0.824444	0.654812	0.025641		0.0222663	0.014089	0.0330948
CGI926	Prdx6	1	163180540	163181661	921	+	69	0.765984	0.628664	0	0.00877193	0.0345126	0.0166551	0.00555556
CGI927		1	163643027	163643399	172	+	7	0.757848	0.47093	0	0	0.70066	0.0508876	0.712585
CGI928	AI848100	1	163806190	163807372	982	+	87	0.838442	0.658859	0.0269231	0	0.0231481	0.00976217	0.00920213
CGI929	Pigc	1	163899014	163899783	569	+	40	0.750545	0.613357	0.0271318	0.00290698	0.0259192	0.025066	0.0192308
CGI930	Dnm3	1	164407264	164408508	1044	+	58	0.575594	0.623563	1	0.0185185	0.00187617	0.200841	0.0104167	Oocyte-methylated, gDMR
CGI931	Mettl13	1	164478229	164478986	557	+	43	0.793455	0.624776	0.0643913	0.0156695	0.01443	0.0223134	0.00943396
CGI932	Vamp4	1	164500293	164501844	1351	+	110	0.863547	0.6151	0.0451389	0.0576923	0.0268166	0.013273	0.0125888
CGI933	7420461P10Rik, Myoc	1	164578808	164579286	278	+	13	0.646648	0.539568	1	0.00266208	0.387745	0.248903	0.841398	Oocyte-methylated
CGI934	Bat2l2	1	164669815	164671037	1022	+	94	0.893368	0.642857	0.0121889	0.0298103	0.0650241	0.0115196	0.0265957
CGI935	Prrx1	1	165238777	165239157	180	+	20	1.11974	0.633333	0.0354515	0	0.0425177	0.0311994	0.0752033
CGI936	Prrx1	1	165241805	165242944	939	+	61	0.650571	0.640043	0.0994794	1	0.00854701	0.0297583	0.0201126
CGI937		1	165245030	165245497	267	+	18	0.620379	0.662921	0.0634921		0.0338346	0.0124644	0.0833333
CGI938	Gorab	1	165333493	165334239	546	+	29	0.612828	0.589744	0	0	0.0433642	0.00736532	0.0687259
CGI939	Kifap3	1	165709406	165710285	679	+	45	0.684167	0.622975	0.0166667	0.0526316	0.0177696	0.0396055	0.0278309
CGI940	Scyl3	1	165859709	165860993	1084	+	88	0.788883	0.642989	0.0318994	0	0.0390466	0.0230695	0.11194
CGI941	BC055324, 2810422O20Rik	1	165924296	165925453	957	+	69	0.894238	0.572623	0.0351966		0.0649518	0.0129494	0.0128205
CGI942	Slc19a2	1	166178549	166179994	1245	+	116	0.884944	0.655422	0.0162275	0	0.024387	0.0137086	0
CGI943	4930455F23Rik	1	166205481	166206197	516	+	32	0.646328	0.624031	0.000783699	0	0.0337187	0.0215959	0.0433396
CGI944	Blzf1, Nme7	1	166236949	166238121	972	+	47	0.668759	0.538066	0.00473939	0.0205745	0.0529593	0.0204259	0.0148814
CGI945	Atp1b1	1	166387509	166389307	1598	+	136	0.756323	0.67209	0.0360598	0.0833333	0.0217532	0.0214368	0.0159524
CGI946		1	166829144	166829615	271	+	12	0.468433	0.630996	0	0	0.0555556	0.0208333	0.111765
CGI947		1	167050523	167051362	639	+	33	0.698715	0.544601	0.86966	0.0460829	0.0522029	0.325562	0.271667	Oocyte-methylated, gDMR
CGI948	Sft2d2	1	167123864	167124900	836	+	72	0.794737	0.662679	0.0467172		0.0182407	0.0242338	0.0416667
CGI949	Tiprl	1	167166296	167167640	1144	+	84	0.830915	0.597028	0.0364135	0.0144024	0.0341882	0.0144893	0.00921986
CGI950		1	167211439	167213005	1366	+	102	0.710688	0.661054	0.0146692	0	0.0253061	0.030667	0.0124776
CGI951	Brp44, Dcaf6	1	167389529	167391943	2214	+	174	0.759387	0.644083	0.0182927	0.0192308	0.00851382	0.0222028	0.00546537
CGI952	Mpzl1	1	167563960	167565082	922	+	81	0.741183	0.701735	0.0521655	0	0.0342863	0.0202024	0.0241729
CGI953		1	167571853	167573221	1168	+	81	0.836062	0.577911	0.0106209	0.0140845	0.0341804	0.0199743	0.0224359
CGI954	Rcsd1	1	167637702	167638554	652	+	46	0.659279	0.654908	0.00900901	0.25	0.0709402	0.0282992	0.052105
CGI955	Creg1	1	167693588	167694567	779	+	58	0.785759	0.616175	0.0338052	0.0666667	0.0471961	0.0148719	0.0193237
CGI956	Cd247	1	167770910	167771428	318	+	22	0.682559	0.638365	0.0585453		0.0181818	0.0150594	0.130435
CGI957	Cd247	1	167774887	167775803	716	+	38	0.557898	0.617318	0.0868056	0	0.0307292	0.0282913	0.0545455
CGI958	Pou2f1	1	167931398	167933964	2366	+	237	0.906292	0.669484	0.0316112	0.00292398	0.0553366	0.0179254	0.0207414
CGI959		1	167973452	167973962	310	+	20	0.803315	0.567742	0.0416667	0	0.022447	0.0116777	0.34408
CGI960		1	167977894	167978526	432	+	21	0.858402	0.476852	0.0263158	0.00277707	0	0.0435619	0.0628655
CGI961	Dusp27	1	168030504	168030993	289	+	16	0.635363	0.608997	0.53445	0.0844156	0.00833333	0.265524	0.660143
CGI962	Gpa33	1	168068411	168068827	216	+	10	0.641836	0.546296	0.000892857	0	0.015625	0.00530754	0.226109
CGI963	Gpa33	1	168090707	168091066	159	+	7	0.636389	0.528302	0	0	0.0555556	0.009375	0.0714286
CGI964	Mael	1	168168400	168169206	606	+	53	0.749909	0.684818	0.0135135	0	0.0514706	0.0262777	0.468762
CGI965	Ildr2	1	168183829	168185213	1184	+	73	0.705133	0.594595	0.0222222	0.0545843	0.0255349	0.0509542	0.0533333
CGI966	Ildr2	1	168212791	168213209	218	+	14	0.674899	0.623853	0.084058	0	0.0681818	0.0370637	0.00985222
CGI967	Ildr2	1	168238590	168239919	1129	+	99	0.851319	0.643047	0.0410844	0	0.00539084	0.0211761	0.0355967
CGI968	Tada1	1	168308680	168310408	1528	+	139	0.879554	0.646597	0.0417038	0	0.0279954	0.00811092	0.00814815
CGI969	Pogk	1	168339136	168340397	1061	+	95	0.793848	0.672008	0	0	0.0703125	0.0219272	0.0858586
CGI970	Fam78b	1	168930536	168932978	2242	+	206	0.799187	0.679304	0.0258565	0	0.0513339	0.0135849	0.0285223
CGI971	Uck2	1	169213654	169215913	2059	+	172	0.80703	0.644488	0.0478483	0.0190707	0.0420956	0.0125734	0.0190807
CGI972	Tmco1	1	169238235	169239353	918	+	87	0.946056	0.633987	0.0070922	0.222222	0.00870198	0.0144676	0.0155158
CGI973		1	169270053	169270991	738	+	47	0.773427	0.574526	0.803101	0.0416972	0.0566667	0.0434334	0.0442177	Oocyte-methylated, gDMR
CGI974	Aldh9a1	1	169279900	169280886	786	+	57	0.686212	0.652672	0.0387931	0	0.0375	0.0176528	0.0152302
CGI975	Mgst3	1	169323612	169324114	302	+	20	0.680142	0.625828	0.0854167	0	0.0216931	0.052769	0.00520833
CGI976		1	169323981	169324535	354	+	19	0.783125	0.525424	0		0.0432	0.061178	0.00520833
CGI977	Lrrc52	1	169375873	169376337	264	+	14	0.687047	0.556818	0.0414214	0	0.0285714	0.0273747	0.650385
CGI978	Rxrg	1	169528311	169529204	693	+	38	0.669732	0.580087	0.04		0.0487815	0.00839372	0.0420288
CGI979	Rxrg	1	169548196	169548793	397	+	15	0.475511	0.574307	0.0040107	0	0.204548	0.0392547	0.520833
CGI980	Rxrg	1	169562239	169562949	510	+	28	0.712446	0.556863	0.0374524	0	0.139168	0.035265	0.461164
CGI981		1	169590581	169590973	192	+	12	0.741377	0.598958	0	0	0.0232194	0.0300144	0.0729885
CGI982		1	169591204	169591700	296	+	17	0.564519	0.641892	0		0	0.0155707	0.008
CGI983		1	169602735	169603250	315	+	9	0.329437	0.590476	0.0473025	0.0512821	0.15	0.0157549	0.142743
CGI984	Lmx1a	1	169618247	169620429	1982	+	146	0.741593	0.630676	0.0305095	0.0284566	0.0516807	0.0244517	0.0170344
CGI985	Lmx1a	1	169621931	169622714	583	+	39	0.779575	0.586621	0.0250089	0.00704696	0.0548806	0.0205814	0.0181681
CGI986	Lmx1a	1	169732734	169733867	933	+	59	0.746948	0.59164	0.0227273	0	0.0118041	0.0120888	0.027044
CGI987		1	169859812	169860326	314	+	24	0.740313	0.646497	0	0	0	0.0386209	0
CGI988		1	170362597	170363014	217	+	12	0.927679	0.493088	0	0	0.0181224	0.0140056	0.0214286
CGI989	Nuf2	1	171461230	171461938	508	+	36	0.872575	0.570866	0.0021645	0.0208333	0.0166667	0.0214681	0.025
CGI990	Hsd17b7	1	171898857	171899693	636	+	46	0.792376	0.608491	0.0318841		0.115789	0.0127837	0
CGI991	Uap1	1	172104308	172105817	1309	+	106	0.821079	0.629488	0.0256692	0	0.0319386	0.0170893	0.0309811
CGI992	Uhmk1	1	172144761	172145710	749	+	71	0.835768	0.674232	0.031106	0.023704	0.0608974	0.0281437	0.0333571
CGI993		1	172185097	172186069	772	+	59	0.71161	0.661917	0.0256135	0.0338412	0.0679469	0.0116232	0.094093
CGI994	Nos1ap	1	172519042	172520504	1262	+	120	0.857318	0.669572	0.0273973	0.0409836	0.0362558	0.0224975	0.0571726
CGI995	Olfml2b	1	172574201	172575116	715	+	47	0.670627	0.633566	0.0141844	0.044	0.0988436	0.0239206	0.0483858
CGI996	Atf6	1	172701658	172702016	158	+	8	1.01927	0.449367	1	0	0.155864	0.197096	0.0517241	Oocyte-methylated, gDMR
CGI997	Atf6	1	172797241	172798189	748	+	49	0.889744	0.553476	0.0476212	0.0141499	0.0135417	0.0105548	0
CGI998		1	172798692	172799222	330	+	25	1.28775	0.5	0.0263158	0.00776728	0.00438596	0.0147922	0
CGI999	Dusp12	1	172814861	172815810	749	+	52	0.691442	0.634179	0.0192308	0.0295524	0.0913771	0.0202008	0.0578947
CGI1000	Fcrlb	1	172837322	172839153	1631	+	114	0.731942	0.619252	0.97041	0.0444444	0.0462838	0.274849	0.0932401	Oocyte-methylated, gDMR
CGI1001		1	172963170	172963561	191	+	8	0.792591	0.465969	0	0	0.110052	0.0148048	0.0420791
CGI1002		1	172963553	172964305	552	+	27	0.797599	0.5	0.0357143	0	0.0318742	0.0227034	0.018336
CGI1003		1	172968091	172968791	500	+	35	1.14984	0.494	0.0159057		0.0697879	0.0128929	0.0137255
CGI1004		1	172974627	172975059	232	+	11	0.603354	0.564655	0.037037	0	0.015681	0.0345957	0.0922427
CGI1005		1	172993784	172994284	300	+	22	0.999257	0.626667	0.0317399	0	0.0495045	0.0453209	0.0921795
CGI1006		1	173008645	173009015	170	+	3	0.760026	0.352941	0	0	0.08424	0.0853175	0.244628
CGI1007		1	173015772	173016346	374	+	24	0.705887	0.606952	0.0100196	0	0.0227273	0.00358423	0.0483871
CGI1008		1	173031859	173033110	1051	+	61	0.742973	0.559467	0.00443917	0.0297075	0.0315123	0.0267207	0.0352321
CGI1009		1	173040962	173041417	255	+	13	0.900447	0.478431	0		0.0222485	0.00584295	0.0322028
CGI1010		1	173043858	173044496	438	+	25	0.633518	0.60274	0	0.0588235	0.048861	0.0213352	0.0410053
CGI1011	Sdhc, Mpz	1	173080358	173080991	433	+	27	0.669068	0.612009	0.015873	0.0269885	0.00895317	0.0144604	0.0238095
CGI1012	Mpz	1	173089797	173090345	348	+	19	0.635889	0.606322	0	0	0.0233135	0.044222	0.149821
CGI1013	Pcp4l1	1	173125874	173126483	409	+	32	0.664745	0.689487	0	0	0.0166667	0.0150218	0.101562
CGI1014	Tomm40l	1	173151871	173152447	376	+	15	0.493201	0.571809	0.0533597	0	0.0540691	0.0294179	0.0279321
CGI1015	Fcer1g	1	173164244	173164626	182	+	11	0.616747	0.631868	0.997354	0	0.654086	0.414607	0.592292	Oocyte-methylated
CGI1016	Ndufs2	1	173176915	173177751	636	+	41	0.733296	0.597484	0.0494624	0	0.0803881	0.014902	0.0342313
CGI1017	Adamts4	1	173186620	173186997	177	+	11	0.61266	0.649718	0	0	0.0416667	0.0185978	0.717347
CGI1018	Adamts4	1	173188876	173189281	205	+	8	0.439243	0.6	0.00331749	0	0.222222	0.0509708	0.473523
CGI1019	B4galt3	1	173200161	173201143	782	+	49	0.640722	0.626598	0.0125	0	0.0455651	0.0142175	0.0147479
CGI1020	Ppox	1	173210815	173211933	918	+	39	0.549389	0.556645	0.0211251	0.0010395	0.0371463	0.0171321	0.0472873
CGI1021	Usp21	1	173217421	173218432	811	+	49	0.621455	0.633785	0.00151744	0.040404	0.0293574	0.0258903	0.0211827
CGI1022	Ufc1	1	173224516	173225113	397	+	27	0.895506	0.554156	0.00390625	0.0277778	0.0482804	0.0183169	0
CGI1023	Dedd	1	173258757	173260378	1421	+	111	0.734142	0.663617	0.0394118	0	0.0160348	0.00784569	0.0138924
CGI1024	Pfdn2, Nit1	1	173275432	173276741	1109	+	64	0.727273	0.571686	0.0483871	0	0.0605122	0.0124669	0.0252585
CGI1025	Klhdc9	1	173290141	173291327	986	+	58	0.69411	0.583164	0.856865	0.0181818	0.132006	0.241583	0.069169	Oocyte-methylated, gDMR
CGI1026	Pvrl4	1	173310054	173310786	532	+	28	0.586845	0.601504	0.0534788		0.0414204	0.00515625	0.047046
CGI1027	Usf1	1	173341197	173342588	1191	+	88	0.791788	0.612091	0.0442436	0	0.0429531	0.0500837	0.0131011
CGI1028	F11r	1	173367371	173368377	806	+	50	0.689179	0.600496	0.0059596	0.0108696	0.0343023	0.0220037	0.0533854
CGI1029	Refbp2	1	173433354	173434586	1032	+	75	0.867349	0.581395	0.00829108		0.0307447	0.0129704	0.0340278
CGI1030		1	173609740	173610257	317	+	23	0.703276	0.643533	0.0133333	0	0.231405	0.0222334	0.325758
CGI1031	Vangl2	1	173939496	173940302	606	+	34	0.613936	0.605611	0.0137077	0	0.127478	0.0347504	0.253272
CGI1032	Vangl2	1	173943030	173943400	170	+	12	0.740285	0.629412	0.0263158	0	0.435185	0.0138831	0.0555556
CGI1033	Vangl2	1	173956512	173957799	1087	+	71	0.612501	0.662374	0.0257143	0.0310345	0.00858586	0.0276419	0.00740741
CGI1034	Nhlh1	1	173983809	173984573	564	+	37	0.658386	0.634752	0	0.047619	0.0350877	0.0476537	0.0279541
CGI1035	Copa, Ncstn	1	174012542	174013458	716	+	48	0.720529	0.611732	0.0434426	0	0.0254065	0.018781	0.0042328
CGI1036	Pex19	1	174056757	174057227	270	+	16	0.779306	0.588889	0		0.0524038	0.0198904	0.0357143
CGI1037	Dcaf8	1	174077868	174079136	1068	+	79	0.803684	0.609551	0.015516	0.0546448	0.0307392	0.0246794	0.0125271
CGI1038	Pea15a	1	174136239	174137184	745	+	41	0.524542	0.648322	0.938596		0.0346154	0.240091	0	Oocyte-methylated, gDMR
CGI1039	Atp1a4	1	174174707	174175332	425	+	24	0.706472	0.569412	0.05	0	0.0514798	0.0209011	0.301957
CGI1040		1	174240077	174240443	166	+	7	0.492021	0.590361	0.00343887	0	0.461607	0.0282919	0
CGI1041	Igsf8	1	174242003	174243226	1023	+	63	0.569834	0.657869	0.0325146	0.00344828	0.0547275	0.0273861	0.0222222
CGI1042	Igsf8	1	174248163	174248838	475	+	22	0.483787	0.621053	0.998718	0.0378788	0.420833	0.290973	0.231481	Oocyte-methylated
CGI1043	Kcnj9	1	174255575	174257186	1411	+	116	0.885918	0.609497	0.0405095	0	0.0663629	0.0169094	0.105736
CGI1044	Kcnj10	1	174270786	174271733	747	+	48	0.713444	0.629183	0.0422543	0	0.0245197	0.0683244	0.0712617
CGI1045	Kcnj10	1	174298960	174299687	527	+	22	0.539153	0.557875	0.0277778		0.0458081	0.0249078	0.0518519
CGI1046	Kcnj10	1	174299815	174300200	185	+	10	0.712665	0.556757	0.101324		0.12368	0.0136336	0.52
CGI1047	Pigm	1	174306244	174307840	1396	+	115	0.883254	0.611032	0.130639	0.00520833	0.0997732	0.0234899	0.0820049
CGI1048		1	174322191	174322641	250	+	10	0.600488	0.556	0.0238585	0.113971	0.605735	0.067694	0.4273
CGI1049		1	174381154	174381506	152	+	10	0.724463	0.605263	0	0	0.0320513	0.0353281	0.401818
CGI1050	Igsf9	1	174411791	174412573	582	+	39	0.689002	0.635739	0.913043	0	0.0163579	0.062626	0.0358209	Oocyte-methylated, gDMR
CGI1051	Igsf9	1	174420544	174420936	192	+	8	0.486466	0.598958	0.75	0	0.226667	0.107115	0.14375
CGI1052	Igsf9	1	174426023	174426595	372	+	20	0.574735	0.612903	0.995671	0.130435	0.0532051	0.203315	0.404907	Oocyte-methylated, gDMR
CGI1053	Tagln2	1	174430042	174431377	1135	+	70	0.634683	0.623789	0.0680304	0	0.067734	0.0168422	0.00905797
CGI1054	Ccdc19	1	174450994	174451532	338	+	16	0.627348	0.58284	0.0833333		0.178538	0.0241559	0.0218254
CGI1055	Ccdc19	1	174456777	174457247	270	+	12	0.610254	0.540741	0.0837912	0	0.227857	0.0270191	0.276331
CGI1056	Ccdc19	1	174462476	174463080	404	+	17	0.513196	0.576733	0.0458333	0	0.0366915	0.0207417	0.151108
CGI1057	Ccdc19	1	174474992	174475649	457	+	24	0.629412	0.582057	0.988406	0.0307692	0.0685958	0.382382	0.596157	Oocyte-methylated, gDMR
CGI1058	Vsig8	1	174491938	174493871	1733	+	104	0.614559	0.625505	0.0116895	0.0103536	0.0479469	0.0303613	0.0326378
CGI1059	Slamf8	1	174518817	174519178	161	+	12	1.1768	0.540373	0.909091		0.0433699	0.0146853	0.504931	Oocyte-methylated, gDMR
CGI1060	Dusp23	1	174562557	174563425	668	+	48	0.682075	0.649701	0.0449275	0	0.0612245	0.0244754	0.00383772
CGI1061		1	174564726	174565201	275	+	12	0.589227	0.545455	0.0220607	0	0.0900893	0.0275998	0.554903
CGI1062	Cadm3	1	175296903	175298232	1129	+	69	0.584571	0.647476	0.0435726	0.00462963	0.0446429	0.060726	0.0181818
CGI1063		1	175642098	175642512	214	+	18	1.13028	0.649533
CGI1064	Fmn2	1	176431703	176433894	1991	+	119	0.588254	0.63787	0.0199348	0	0.0876832	0.0130676	0.00942533
CGI1065	Grem2	1	176766797	176767449	452	+	26	0.66769	0.588496	0.165161	0.00198295	0.0555556	0.116868	0.668878
CGI1066	Grem2	1	176851464	176852144	480	+	26	0.611842	0.595833	0.047043	0.0396825	0.025	0.0467796	0.0995935
CGI1067	Rgs7	1	177421687	177423124	1237	+	97	0.692183	0.674212	0.0202899	0.00509363	0.0344828	0.0194412	0.0561629
CGI1068	Fh1	1	177555010	177556108	898	+	65	0.722223	0.63363	0.0680922	0	0.104187	0.0136381	0.0251736
CGI1069	Opn3	1	177621945	177623353	1208	+	103	0.7547	0.673013	0.000289352	0	0.0481577	0.0196511	0.00515488
CGI1070	Exo1	1	177810471	177811537	866	+	67	0.846434	0.605081	0.0331354	0	0.0493223	0.0427945	0.00268817
CGI1071	Pld5	1	178153351	178153712	161	+	10	0.75142	0.57764	0.102083	0	0.0330579	0.0247563	0.0357143
CGI1072	Pld5	1	178204614	178206028	1214	+	98	0.753417	0.658155	0.0327024	0.00607639	0.0799472	0.0219619	0.115914
CGI1073		1	178655035	178655520	285	+	25	1.12849	0.57193	0.00219298	0.00617284	0.0408163	0.00694444	0.25
CGI1074	Sdccag8	1	178743262	178745315	1853	+	138	0.752157	0.630869	0.0206262	0	0.0178048	0.0365064	0.0122951
CGI1075	Sdccag8	1	178765449	178766093	444	+	33	0.710385	0.648649	0	0	0.01885	0.0332101	0.0491402
CGI1076	Sdccag8	1	178923783	178924191	208	+	9	0.5763	0.552885	0.0119048	0	0.947811	0.0265787	0.506652	Sperm-methylated, gDMR
CGI1077	Sdccag8	1	178927961	178928546	385	+	18	0.529093	0.602597	0	0.00855655	0.0614035	0.0244088	0.230159
CGI1078		1	179187180	179189448	2068	+	214	0.795955	0.721954	0.052182	0	0.00489728	0.0114386	0.0111111
CGI1079		1	179252759	179253477	518	+	40	0.899055	0.594595	0.00707783	0.0153732	0.0489433	0.00854978	0.0242424
CGI1080		1	179268865	179269445	380	+	22	0.628434	0.607895	0.0361872	0.00446429	0.0271739	0.0182634	0.119271
CGI1081		1	179371451	179373776	2125	+	253	0.941433	0.711529	0.0133489	0	0.0780283	0.0132928	0.0129712
CGI1082	Zfp238	1	179378101	179378781	480	+	26	0.601021	0.602083		0.125	0.888745	0.308539	0.350794
CGI1083		1	179429116	179429601	285	+	13	0.68624	0.522807	0.0281955	0	0.113055	0.0255034	0.744928
CGI1084	Adss	1	179725809	179727152	1143	+	97	0.747199	0.67629	0.0186052		0.0201509	0.0341316	0.0339537
CGI1085		1	179913119	179913981	662	+	55	0.733335	0.673716	0.0178571	0.025641	0.0166667	0.0316892	0
CGI1086		1	180073222	180073588	166	+	15	0.878979	0.644578	0.2	0.00833333	0.0926237	0.242557	0.270833
CGI1087	Pppde1	1	180117339	180118241	702	+	59	0.748036	0.67094	0.0931818	0.037037	0.00324675	0.0100263	0
CGI1088		1	180205753	180207208	1255	+	100	0.839348	0.620717	0.0171369	0	0.110701	0.0128281	0.0490122
CGI1089	Fam36a	1	180248147	180249558	1211	+	109	0.904311	0.634187	0.0275224	0	0.104664	0.0126954	0.0274296
CGI1090	Hnrnpu	1	180266360	180268315	1755	+	214	0.994985	0.712821	0.0277023	0.0310693	0.0192468	0.0103086	0.0096437
CGI1091		1	180298620	180299510	690	+	36	0.641698	0.572464	0.00128205	0.0042735	0.0136364	0.0151528	0.0506169
CGI1092	Efcab2	1	180335658	180336901	1043	+	87	0.767862	0.659636	0.0580882		0.0259951	0.0222548	0
CGI1093	Kif26b, D230039L06Rik	1	180457314	180461259	3745	+	280	0.742714	0.634713	0.0322613	0.0214799	0.0302672	0.0197897	0.00650069
CGI1094	Kif26b	1	180847329	180848332	803	+	39	0.4852	0.635118	0.115202	0.00482262	0.166165	0.155541	0.580649
CGI1095	Smyd3	1	181447246	181448374	928	+	46	0.666002	0.55819	0.0306773	0.0555556	0.0290163	0.0128449	0.0171679
CGI1096	Cnst, Tfb2m	1	181475711	181477238	1327	+	121	0.956118	0.62095	0.0419964	0.0141441	0.098515	0.0145868	0.0265627
CGI1097	Cnst	1	181521780	181522155	175	+	8	0.686182	0.531429	0.0800866	0.0883838	0.961296	0.156844	0.678571	Sperm-methylated, gDMR
CGI1098	Sccpdh	1	181597606	181598968	1162	+	104	0.873275	0.641997	0.0206939	0.00820513	0.0179398	0.0218057	0.0426829
CGI1099	Ahctf1	1	181732861	181734322	1261	+	145	1.0251	0.674068	0.0282384	0.0675676	0.056599	0.0119393	0.020802
CGI1100		1	181889157	181890961	1604	+	169	0.922329	0.678304	0.0441472	0.111111	0.0357395	0.0114012	0.0353139
CGI1101	Adck3	1	182125517	182126517	800	+	57	0.792657	0.6	0.000138466	0.0198128	0.0238285	0.00878062	0.00785297
CGI1102		1	182156026	182156500	274	+	15	0.824187	0.532847	0.341978	0.0416667	0.028355	0.0173254	0.0233214
CGI1103		1	182180173	182180576	203	+	10	0.485726	0.64532	0.969231	0	0.0976809	0.229982	0.326316	Oocyte-methylated, gDMR
CGI1104		1	182185832	182186830	798	+	63	0.695994	0.675439	0.0429272	0.1	0.150407	0.0100055	0.0213675
CGI1105		1	182219564	182219985	221	+	12	0.592012	0.61086	0.00333333	0	0.0233333	0.0323158	0.535714
CGI1106	Itpkb	1	182260533	182263158	2425	+	164	0.667593	0.636701	0.000310559	0.0210569	0.0181639	0.0219807	0.0250565
CGI1107	Itpkb	1	182295206	182296040	634	+	29	0.626618	0.542587	0.0366379	0.0237124	0.010351	0.0565451	0.0881403
CGI1108	Itpkb	1	182317498	182318036	338	+	16	0.523153	0.618343	0.0338346	0	0.00662879	0.00545455	0.00914634
CGI1109	Itpkb	1	182333691	182334249	358	+	17	0.570059	0.578212	0.10302	0.04856	0	0.0724056	0.703704
CGI1110	Itpkb	1	182351779	182352178	199	+	12	0.603333	0.648241	0.119512	0.0909091	0.0431373	0.0265739	0.0714286
CGI1111	6330403A02Rik	1	182412712	182414004	1092	+	66	0.581056	0.647436	0.0222567	0	0.0208333	0.0288284	0.295883
CGI1112		1	182413923	182414590	467	+	18	0.612034	0.503212	0	0	0.0294904	0.0172098	0.0714286
CGI1113	Parp1	1	182498716	182499733	817	+	77	0.881023	0.657283	0.0263158	0.0434783	0.071145	0.0329395	0.0376984
CGI1114	Lin9	1	182570577	182572331	1554	+	160	0.85911	0.69305	0.0431265	0.0322581	0.0285725	0.0135792	0.0433996
CGI1115	Mixl1	1	182626494	182627829	1135	+	94	0.784254	0.65022	0.0240225	0.0322581	0.0444139	0.0197609	0.052442
CGI1116	Acbd3	1	182655530	182656892	1162	+	107	0.845388	0.660929	0.0243608	0	0.0132898	0.011341	0.0208333
CGI1117		1	182693694	182694107	213	+	11	0.63623	0.58216	0	0	0.0146853	0.0990642	0.0520391
CGI1118		1	182698258	182699007	549	+	30	0.567988	0.621129	0.637075	0.142857	0	0.114847	0.0454545
CGI1119		1	182707534	182708887	1153	+	73	0.652887	0.623591	0.0154244	0	0.0120219	0.0169608	0.0135135
CGI1120		1	182724080	182724844	564	+	28	0.521804	0.618794	0.0432079	0	0.0204216	0.00844964	0.0444444
CGI1121	H3f3a	1	182742528	182744883	2155	+	202	0.908263	0.642691	0.0151604	0.0229885	0.0293472	0.0148311	0.0222653
CGI1122		1	182760360	182760721	161	+	7	0.515474	0.583851	0.240361	0.155856	0.114286	0.0436861	0
CGI1123	BC031781	1	182780456	182781698	1042	+	82	0.834092	0.615163	0.0315941	0.0219312	0.0530828	0.0253482	0.015188
CGI1124	Lefty2	1	182824345	182825199	654	+	42	0.636807	0.642202	0.0154069	0.0204042	0.0272288	0.0141346	0.107143
CGI1125	Pycr2	1	182833884	182835111	1027	+	60	0.71475	0.574489	0.03125	0	0.0663743	0.0950011	0.0186404
CGI1126	Lefty1	1	182866753	182867595	642	+	35	0.647814	0.580997	0.0108696	0.0596594	0.0650794	0.0668816	0.110286
CGI1127	Tmem63a	1	182871842	182873443	1401	+	92	0.701885	0.613133	0.0316845	0.0630052	0.0344828	0.0378494	0.0215686
CGI1128	Tmem63a	1	182873412	182873854	242	+	3	0.170171	0.541322	0.0436508		0.685937	0.122896	0.590887
CGI1129	Ephx1	1	182947227	182947777	350	+	20	0.624838	0.605714	0.0555556	0	0.0260417	0.0376948	0
CGI1130	Nvl	1	183073817	183074928	911	+	58	0.836301	0.554336	0.0262685	0.0247949	0.0226009	0.0196209	0.0320679
CGI1131	Cnih4	1	183080808	183081704	696	+	58	0.799551	0.646552	0.0906926	0.037037	0.0590774	0.00978801	0.0465116
CGI1132	Wdr26	1	183140772	183142866	1894	+	180	0.743299	0.715945	0.0717662	0.0394737	0.0968537	0.0234425	0
CGI1133		1	183186552	183187194	442	+	21	0.512565	0.622172	0	0	0	0.0543685	0
CGI1134		1	183202894	183203415	321	+	15	0.571265	0.573209	0.333657	0.5	0	0.0195599	0.195595
CGI1135	Cnih3	1	183282108	183284020	1712	+	109	0.633721	0.63493	0.0289491	0.02032	0.113994	0.0231821	0.0460942
CGI1136	Ccdc121	1	183440411	183441095	484	+	19	0.496393	0.568182	0.0967309	0.117647	0.0209402	0.0195272	0.528743
CGI1137		1	183475418	183475841	223	+	14	0.975144	0.515695	0	0.0666667	0.00568182	0.02881	0.0375
CGI1138	Lbr	1	183771523	183773445	1722	+	155	0.895374	0.639954	0.0260109		0.030027	0.0167092	0.020094
CGI1139		1	183811564	183811970	206	+	4	0.235903	0.57767	0.0634921	0.166667	0.27	0.01036	0.263636
CGI1140	Enah	1	183853443	183854003	360	+	24	0.791673	0.611111	0.915013	0.05	0.0640992	0.266592	0.243257	Oocyte-methylated, gDMR
CGI1141	Enah	1	183949041	183951088	1847	+	228	1.00345	0.701678	0.017789	0	0.0139589	0.0372297	0.0720997
CGI1142		1	184043214	184043614	200	+	9	0.553902	0.585	0.0833333	0	0.025	0.0384137	0.698485
CGI1143	Srp9	1	184054522	184055586	864	+	72	0.784938	0.653935	0.0327344	0.0333333	0.0191558	0.0184663	0.0422477
CGI1144	Degs1	1	184212120	184213315	995	+	95	0.869071	0.663317	0.0152366	0	0.0289855	0.00723667	0.0171429
CGI1145	Fbxo28	1	184270892	184272100	1008	+	97	0.863505	0.668651	0.00595238	0.00526316	0.00973545	0.0136792	0.0502137
CGI1146	Trp53bp2	1	184338516	184339909	1193	+	115	0.854344	0.672255	0.0689655	0.0588235	0.0183175	0.0158192	0.0228175
CGI1147	Capn2	1	184419849	184420303	254	+	15	0.671299	0.594488	0.0125	0.05	0.0381837	0.0357912	0.0526316
CGI1148	Capn2	1	184446855	184448097	1042	+	93	0.793773	0.672745	0.0682951	0	0.0594595	0.0246713	0.0244028
CGI1149	4922505E12Rik	1	184677978	184678512	334	+	16	0.529911	0.610778	0.0015625	0.0428571	0.00974235	0.0434283	0.375903
CGI1150	4922505E12Rik	1	184678694	184679255	361	+	24	0.631217	0.65097	0.0320707	0.0246212	0.208333	0.0244405	0.348485
CGI1151	Susd4	1	184693272	184695390	1918	+	132	0.681808	0.636079	0.03125	0.00501253	0.0673077	0.0263464	0.095671
CGI1152	Tlr5	1	184884766	184885472	506	+	23	0.495035	0.606719	0	0.0833333	0.0401922	0.0374465	0.116447
CGI1153	Tlr5	1	184890184	184890584	200	+	9	0.548196	0.575	0.106846	0.25	0.012987	0.0186275	0
CGI1154		1	184913120	184913660	340	+	14	0.492372	0.579412	0.0131579		0.0806994	0.00999616	0.10906
CGI1155	Dusp10, 1700056E22Rik	1	185857055	185858595	1340	+	110	0.77686	0.652239	0.0127033	0.0689655	0.0552434	0.025105	0.0152695
CGI1156		1	186542117	186542806	489	+	33	0.747507	0.607362	0.0520188	0	0.0967742	0.0184847	0.0639937
CGI1157	Hlx	1	186551177	186552128	751	+	47	0.65452	0.620506	0.0744699	0.0433715	0.0162602	0.0150774	0.0783246
CGI1158	Hlx	1	186555297	186557218	1721	+	126	0.760345	0.622894	0.0211273	0.00188324	0.0571152	0.023942	0.0129603
CGI1159		1	186558354	186558725	171	+	9	0.639956	0.584795	0.0849359	0	0.0270833	0.00555556	0.0454545
CGI1160	Mosc1	1	186616918	186617627	509	+	23	0.567903	0.565815	0.0123313	0	0.0886653	0.0176498	0.144444
CGI1161	Mosc1	1	186634440	186635316	676	+	52	0.719038	0.656805	0.0388435	0.0216413	0.0301282	0.0236686	0.222523
CGI1162	Mosc2	1	186650960	186651691	531	+	23	0.625917	0.538606	0.0160714	0.00328947	0.0725309	0.0126767	0.129032
CGI1163	Mosc2	1	186669044	186670212	968	+	67	0.75336	0.608471	0.0432755	0	0.0221944	0.0141341	0.0234375
CGI1164		1	186675723	186676103	180	+	9	0.705217	0.538889	0	0	0.0416667	0.00909091	0.47381
CGI1165	C130074G19Rik	1	186697912	186698585	473	+	22	0.628498	0.545455	0.0338015	0	0.0358696	0.0300016	0.540895
CGI1166	C130074G19Rik	1	186706079	186707420	1141	+	77	0.709976	0.617003	0.0168475	0	0.0475435	0.0293294	0.0716285
CGI1167	Mark1	1	186822837	186824508	1471	+	161	0.94359	0.681849	0.0189732	0.0166667	0.0116883	0.0469124	0.00965909
CGI1168		1	187016893	187017275	182	+	9	0.659084	0.549451	0.0637425	0	0.00896359	0.00654762	0.538959
CGI1169	Rab3gap2	1	187027327	187028557	1030	+	68	0.751652	0.6	0.0376958	0.00379308	0.0267815	0.0431961	0.0386792
CGI1170	Iars2	1	187152377	187153596	1019	+	82	0.817948	0.628067	0.0337606	0.0111453	0.0256349	0.0309278	0.0408163
CGI1171	Bpnt1	1	187155678	187156383	505	+	33	0.727585	0.6	0.00733187	0	0.00733641	0.0170212	0.00204082
CGI1172	Eprs	1	187186421	187187818	1197	+	112	0.96524	0.623225	0.0816724	0.0281787	0.0525041	0.0258876	0.00987654
CGI1173	Slc30a10	1	187278492	187279733	1041	+	83	0.724533	0.663785	0.0141284	0.0424784	0.00539165	0.0722283	0.01204
CGI1174	Lyplal1	1	187940668	187941426	558	+	39	0.766052	0.609319	0.00312342	0	0.0146858	0.0289342	0.0298742
CGI1175	Tgfb2	1	188528008	188528726	518	+	35	0.776086	0.592664	0.0531714	0	0.0362718	0.0348112	0.0357143
CGI1176	Tgfb2	1	188528851	188530137	1086	+	82	0.784852	0.620626	0.0137668	0.0238095	0.0335867	0.0186438	0.0402244
CGI1177	Rrp15	1	188572777	188573588	611	+	38	0.774067	0.574468	0.0300875	0.0300983	0.0281878	0.0166383	0.0122192
CGI1178		1	188657138	188657604	266	+	14	0.57026	0.646617	0.0104167		0.0524376	0.0367948	0.0697787
CGI1179		1	188657697	188658791	894	+	43	0.569516	0.581655	0.0222785	0.0266667	0.00902458	0.088225	0.0588235
CGI1180		1	188682258	188682716	258	+	19	1.10835	0.51938	0.0181159	0.0259881	0.0939837	0.0594902	0.821029
CGI1181	D1Pas1	1	188791069	188792414	1145	+	89	0.889535	0.59738	0.0720463	0.030591	0.130311	0.0209905	0.184677
CGI1182	Gpatch2, Spata17	1	189039149	189039925	576	+	51	0.940283	0.616319	0.0337526	0.00781992	0.0221675	0.0195112	0.00546448
CGI1183	Gpatch2	1	189172192	189172639	247	+	10	0.513679	0.562753	0.998299	0	0.954698	0.240127	0.840278	Oocyte and sperm-methylated
CGI1184		1	189428521	189428933	212	+	13	0.868044	0.533019	0	0	0.0631579	0.0277381	0.166667
CGI1185		1	189429176	189429591	215	+	19	0.906781	0.627907	0.00925926	0.0199693	0.0441919	0.022383	0.193548
CGI1186		1	189431005	189432219	1014	+	49	0.573844	0.58284	0.037037	0.037037	0.0173726	0.0316498	0.177951
CGI1187		1	189432447	189434172	1525	+	102	0.754896	0.596066	0.0295603	0	0.0198713	0.0205288	0.0286962
CGI1188		1	189475375	189476159	584	+	49	0.914999	0.606164	0.020996		0.0404814	0.0571016	0.255172
CGI1189	Esrrg	1	189821390	189822242	652	+	39	0.763905	0.565951	0.0924173	0	0.0343137	0.0734807	0.129167
CGI1190	Esrrg	1	189901563	189901974	211	+	5	0.278368	0.587678	0.280175	0	1	0.299036	1	Sperm-methylated
CGI1191	Ush2a	1	190086996	190087445	249	+	14	0.646721	0.594378	0.621809	0	0.0796296	0.305487	0.845798
CGI1192	Ush2a	1	190537963	190538329	166	+	8	0.689396	0.548193	0.302874	0	0.875712	0.212376	0.809136	Sperm-methylated
CGI1193	Kctd3	1	190830744	190831994	1050	+	81	0.706453	0.664762	0.00190476	0.0141129	0.0803333	0.0150355	0.0393519
CGI1194	Kcnk2	1	191073698	191074335	437	+	25	0.737378	0.569794	0.622222	0	0.117007	0.343244	0.493056
CGI1195	Kcnk2	1	191166513	191168404	1691	+	103	0.667402	0.604967	0.0284781	0.0144928	0.0486096	0.0161423	0.0678996
CGI1196		1	191383590	191384234	444	+	24	0.840618	0.545045	0.00634921	0.125	0.0231481	0.0805996	0.630952
CGI1197		1	191405680	191406432	552	+	30	0.598487	0.619565	0.979323	0.0277778	0.01141	0.328292	0.230935	Oocyte-methylated, gDMR
CGI1198	Cenpf	1	191511454	191512481	827	+	61	0.767833	0.620314	0.00530504	0	0.0176329	0.0202182	0.0203051
CGI1199	Ptpn14	1	191551169	191553024	1655	+	128	0.72487	0.656798	0.0136364	0.00391463	0.0136466	0.0511856	0.0114858
CGI1200	Ptpn14	1	191610449	191611007	358	+	20	0.616843	0.606145	0.0488517		0.960025	0.0514613	0.182051	Sperm-methylated, gDMR
CGI1201	Ptpn14	1	191622836	191623219	183	+	11	0.969378	0.513661	0		0.988453	0.111779	0.707639	Sperm-methylated, gDMR
CGI1202	Smyd2	1	191745373	191746859	1286	+	99	0.793332	0.623639	0.0469203	0	0.0457903	0.0253236	0.049862
CGI1203	Prox1	1	191984942	191985417	275	+	12	0.531628	0.578182	0.115686	0.00222222	0.110428	0.00967823	0.74426
CGI1204	Prox1	1	191992585	191993548	763	+	44	0.590429	0.639581	0.0113855	0.00879268	0.0733415	0.0340177	0.0224085
CGI1205	Prox1	1	191993800	191995035	1035	+	77	0.798711	0.613527	0.0198582	0	0.0458014	0.0275635	0.0156519
CGI1206		1	191996243	191997171	728	+	40	0.727637	0.554945	0.0010101	0	0.0870491	0.0358464	0.0824877
CGI1207		1	191998259	191999703	1244	+	71	0.601401	0.616559	0.00958816	0.0362365	0.0630631	0.0223579	0.0326667
CGI1208		1	192306925	192307363	238	+	10	0.520933	0.571429	0.0557387	0.00657895	0.172917	0.0169624	0.47619
CGI1209		1	192505884	192506405	321	+	17	0.591406	0.601246	0.02	0	0.663032	0.0354771	0.585784
CGI1210		1	192514320	192514904	384	+	22	0.615378	0.611979	0.0123457	0	0.0907407	0.0401618	0.280405
CGI1211	Rps6kc1	1	192735222	192736195	773	+	51	0.705966	0.615783	0.00149923	0.0032967	0.0859213	0.0209721	0.0231744
CGI1212	Angel2	1	192751955	192753212	1057	+	103	0.943989	0.645222	0.120971	0	0.0577487	0.0687865	0.0431373
CGI1213	Vash2	1	192772842	192773315	273	+	15	0.65239	0.582418	0.998779	0	0.963265	0.402538	0.33046	Oocyte and sperm-methylated
CGI1214	Vash2	1	192801806	192803587	1581	+	121	0.709191	0.657812	0.0377358	0	0.0438095	0.0245364	0.0178363
CGI1215	Mfsd7b	1	192848903	192850661	1558	+	115	0.720605	0.641207	0.0368102	0.0833333	0.0596046	0.0240758	0.0249221
CGI1216	Tatdn3, Nsl1	1	192886378	192887492	914	+	68	0.837045	0.597374	0.032381	0.0367271	0.0276864	0.0175627	0.0280612
CGI1217	Batf3	1	192921478	192922879	1201	+	107	0.751207	0.690258	0.0263158		0.0465986	0.0198546	0.0272817
CGI1218		1	192949611	192950239	428	+	30	0.652045	0.656542	0.615385	0.0406445	0.139474	0.289798	0.0222222
CGI1219	Atf3	1	193006138	193009733	3395	+	219	0.739293	0.590869	0.0371589	0.0260417	0.0507934	0.0202348	0.0341133
CGI1220		1	193047622	193049000	1178	+	69	0.652604	0.602716	0.0431868	0.00303959	0.0808242	0.0242626	0.0690476
CGI1221	Nenf	1	193141128	193142232	904	+	61	0.672052	0.634956	0		0.0735931	0.0332196	0.140476
CGI1222	Tmem206	1	193149464	193150657	993	+	73	0.708517	0.645519	0.0290235	0.0136986	0.0102041	0.0215994	0.028056
CGI1223	Ppp2r5a	1	193219693	193221895	2002	+	208	0.921931	0.674326	0.019704	0	0.0688497	0.0140692	0.0227215
CGI1224	Dtl, Ints7	1	193398617	193400284	1467	+	126	0.934395	0.608044	0.0170852	0.0344828	0.0251684	0.014901	0.00793651
CGI1225	Lpgat1	1	193541483	193543513	1830	+	211	0.912471	0.711475	0.482286	0.0388072	0.0553425	0.0685689	0.0200348
CGI1226	Nek2	1	193644767	193646204	1237	+	92	0.822949	0.603072	0.0864231	0.01625	0.0444681	0.0196036	0.0263272
CGI1227		1	193658631	193659103	272	+	13	0.575957	0.577206	0.368421	0.0281385	0.494331	0.194167	0.0520833
CGI1228	Slc30a1	1	193729737	193731900	1963	+	209	0.885592	0.693836	0.0294032	0.333333	0.100356	0.0146407	0.0206813
CGI1229	Rd3	1	193808958	193809567	409	+	29	0.673124	0.650367	0	0.000611448	0.0196078	0.0142968	0.355072
CGI1230		1	193813639	193814276	437	+	22	0.650953	0.558352	0.0184405	0	0.0431016	0.00958494	0.03659
CGI1231	Traf5	1	193915665	193916773	908	+	62	0.72814	0.614537	0.014858	0.0328694	0.0307333	0.0189512	0.0894027
CGI1232	Rcor3	1	193960246	193962894	2448	+	208	0.746087	0.677288	0.286538	0.0408163	0.0269383	0.113056	0.0128205
CGI1233	Kcnh1	1	194014146	194015593	1247	+	86	0.698405	0.629511	0.0137674	0.000473528	0.055522	0.0350694	0.0445076
CGI1234	Hhat	1	194596572	194597660	888	+	72	0.783433	0.64527	0	0.0250613	0.103042	0.00687729	0.0613208
CGI1235		1	194659576	194660510	734	+	35	0.556711	0.585831	0.0769056	0.0257941	0.0835342	0.0163785	0.207658
CGI1236		1	194660467	194661459	792	+	59	0.700175	0.652778	0.0367449	0.0248387	0.0612245	0.0179295	0.0606771
CGI1237		1	194661550	194661987	237	+	12	0.589484	0.599156	0.0543066	0.035	0.0366057	0.0142026	0.139785
CGI1238	Sertad4	1	194680639	194682466	1627	+	166	0.887602	0.680393	0.0179426	0.0066886	0.0273095	0.0153948	0.0104167
CGI1239	Syt14	1	194861002	194862622	1420	+	89	0.677018	0.616901	0.0595989	0	0.0360379	0.0241621	0.0456188
CGI1240	AA408296	1	194955827	194956747	720	+	62	0.917531	0.613889	0.0487929	0.0199781	0.021978	0.0131426	0.0337079
CGI1241	Irf6	1	194978907	194979813	706	+	47	0.604869	0.665722	0.054878	0	0.0771605	0.0271016	0.0333333
CGI1242	A130010J15Rik	1	194999307	195000287	780	+	45	0.74304	0.558974	0.0213719	0.0163265	0.0721878	0.015394	0.004
CGI1243	G0s2	1	195098561	195099045	284	+	17	0.557801	0.658451	0.0244903	0	0.0909091	0.025209	0.0986111
CGI1244	Lamb3	1	195156149	195156564	215	+	10	0.494516	0.623256	0.0454545	0	0.954545	0.0739972	0.833333	Sperm-methylated, gDMR
CGI1245		1	195458810	195459190	180	+	17	1.00166	0.622222	0.200742	0.041888	0.034626	0.0907315	0.140735
CGI1246	Plxna2	1	196445559	196447274	1515	+	116	0.734693	0.649505	0.0177778	0.000830565	0.0675496	0.0160406	0.00616246
CGI1247		1	196705608	196705966	158	+	8	0.644403	0.563291	0.431772	0	0.0555556	0.0335188	0.246914
CGI1248	Cd34	1	196764873	196765501	428	+	28	0.598121	0.663551	0.0384615	0	0.0111111	0.00964153	0.071118
CGI1249		1	196802145	196803369	1024	+	85	0.816994	0.642578	0.00722496	0.0114941	0.077594	0.0205057	0.017029
CGI1250	Cd46	1	196918188	196918766	378	+	16	0.547791	0.563492	1	0.00526316	0.034111	0.127898	0.0410053	Oocyte-methylated, gDMR
CGI1251	Cr1l	1	196956988	196957664	476	+	25	0.663166	0.573529	0.0396331	0	0.030303	0.0268328	0.0740741
CGI1252		1	197067541	197068254	513	+	33	0.813997	0.563353	0.158634	0.0279445	0.0742484	0.0370578	0.140284
CGI1253	Cnksr3	10	3133884	3135737	1653	+	121	0.743678	0.629764	0.0462952	0.0114583	0.0690859	0.0228788	0.029052
CGI1254	Cnksr3	10	3139009	3139373	164	+	10	0.638322	0.621951	0.991084	0	0.934887	0.361208	0.526042	Oocyte and sperm-methylated
CGI1255	Oprm1	10	3557330	3558069	539	+	23	0.486107	0.595547	0.122044	0.000938086	0.0484249	0.0450764	0.0609524
CGI1256		10	4310307	4310807	300	+	13	0.673501	0.51	0.166667	0.0909091	0.0448515	0.065963	0.15
CGI1257	Rgs17	10	4423635	4425266	1431	+	91	0.684988	0.610762	0.148936	0	0.0860684	0.026746	0.0192308
CGI1258	Mtrf1l	10	4521948	4523297	1149	+	81	0.694486	0.640557	0.0361111	0.0295082	0.089532	0.0277857	0.0108225
CGI1259	Fbxo5	10	4540211	4541968	1557	+	112	0.704011	0.639692	0.00121581	0.0138889	0.0114064	0.0343255	0.00326421
CGI1260	Syne1	10	4795477	4796529	852	+	46	0.573656	0.619718	0.100446	0	0.0224638	0.0321085	0.00914036
CGI1261	Syne1	10	5151591	5152195	404	+	21	0.585747	0.596535	1	0	0.0196078	0.132192	0.0384615	Oocyte-methylated, gDMR
CGI1262	Esr1	10	5633357	5634611	1054	+	73	0.692856	0.633776	1	0.0165197	0	0.193486	0.00964187	Oocyte-methylated, gDMR
CGI1263	Esr1	10	5636135	5636642	307	+	13	0.536879	0.583062	1		0.105903	0.219125	0.292521	Oocyte-methylated, gDMR
CGI1264	Rmnd1, 1700052N19Rik	10	5913194	5914701	1307	+	95	0.895568	0.570008	0.0408493	0.0322918	0.0245188	0.0147863	0.0243386
CGI1265	Zbtb2	10	5957620	5960103	2283	+	261	0.903698	0.711783	0.045126	0.0242857	0.0222978	0.0314288	0.0337398
CGI1266	Akap12	10	5999393	5999860	267	+	22	0.716239	0.681648	1	0	0	0.103154	0.166667	Oocyte-methylated, gDMR
CGI1267	Akap12	10	6079299	6080339	840	+	54	0.65164	0.628571	0.996795	0	0.0583333	0.129963	0.0129577	Oocyte-methylated, gDMR
CGI1268		10	6080612	6081064	252	+	14	0.707703	0.563492	1	0	0.0333333	0.13023	0.0652174	Oocyte-methylated, gDMR
CGI1269	Mthfd1l	10	6372364	6373724	1160	+	79	0.662906	0.641379	0.0175439	0.0833333	0.0243902	0.0325819	0.0158076
CGI1270		10	6605375	6606425	850	+	70	0.716589	0.683529	0	0	0.00666667	0.0187966	0.00833333
CGI1271	Ppp1r14c	10	6979025	6980553	1328	+	99	0.734214	0.638554	0.0359646	0	0.120182	0.0256407	0.0164262
CGI1272	Lrp11	10	7309096	7310774	1478	+	142	0.906477	0.651556	0.0325255	0.0385904	0.010763	0.018368	0.0097561
CGI1273	Pcmt1	10	7382330	7383698	1168	+	103	0.814365	0.660103	0.0273626	0.0185185	0.0295863	0.0227044	0.00466667
CGI1274	Nup43	10	7387092	7387756	464	+	24	0.603899	0.586207	0.035014	0	0.0178571	0.0169489	0
CGI1275	Lats1	10	7400229	7401837	1408	+	136	0.856639	0.671875	0.0183032	0.01533	0.0217818	0.0141809	0.031891
CGI1276	Katna1	10	7445508	7446312	604	+	44	0.86485	0.581126	0.00932176	0	0.0378571	0.019836	0
CGI1277	BC013529	10	7499936	7500967	831	+	74	0.80242	0.666667	0.0319499	0	0	0.01212	0.00862069
CGI1278	Ppil4	10	7512217	7513347	930	+	61	0.833936	0.566667	0	0.0364638	0.0133626	0.0129436	0.0158974
CGI1279	Zc3h12d	10	7581985	7582550	365	+	19	0.660592	0.569863	0.604103	0.05	0.0628968	0.0824693	0.631537
CGI1280	Zc3h12d	10	7586817	7588066	1049	+	68	0.647232	0.633937	0.431705	0.0187075	0.0710784	0.133941	0.302713
CGI1281		10	7674885	7676899	1814	+	215	0.867635	0.739802	0.000775098	0	0.0396574	0.0120832	0.0143678
CGI1282		10	7855371	7855812	241	+	13	0.780271	0.53112	0		0.380952	0.159477	0.708333
CGI1283	Ust	10	7927095	7927480	185	+	14	1.08639	0.52973	0.0043814	0	0.142958	0.139215	0.832923
CGI1284	Ust	10	7933726	7934176	250	+	12	0.664032	0.54	0.0899351	0	0.973273	0.265282	0.45942	Sperm-methylated, gDMR
CGI1285	Ust	10	8237239	8239099	1660	+	117	0.677199	0.645783	0.00296847	0.0251623	0.0310249	0.0207453	0.0515464
CGI1286	Sash1	10	8605327	8606664	1137	+	93	0.826441	0.630607	0.0184688	0.000520872	0.0808557	0.0187904	0.0148148
CGI1287	Samd5	10	9394065	9396046	1781	+	132	0.740835	0.632791	0.0943109	0.0193661	0.0236606	0.0125324	0.0829117
CGI1288		10	9403484	9403899	215	+	11	0.698839	0.548837	0.0111111	0.0133333	0.0475669	0.0303836	0.739338
CGI1289	Stxbp5	10	9517662	9518092	230	+	13	0.871715	0.513043	1	0	0.100984	0.280183	0.496225	Oocyte-methylated, gDMR
CGI1290	Stxbp5	10	9619992	9621581	1389	+	133	0.848444	0.672426	0.0135177	0.0272727	0.0432416	0.0273544	0.0145833
CGI1291	Rab32	10	10277369	10278243	674	+	49	0.747966	0.624629	0.0169159	0	0	0.0201796	0.00793651
CGI1292	Grm1	10	10408716	10409580	664	+	34	0.517168	0.638554	0.561648	0	0.0319444	0.314898	0.127666
CGI1293	Grm1	10	10656032	10656472	240	+	15	0.775598	0.575	0.0333333	1	0.0666667	0.0321806	0.718996
CGI1294	Grm1	10	10799926	10800752	626	+	37	0.726924	0.573482	0.0126829	0.0328947	0.0465116	0.0131205	0.144168
CGI1295	Grm1	10	10801275	10801852	377	+	17	0.644215	0.551724	0	0.111111	0.0650794	0.0160286	0.0564103
CGI1296	Shprh	10	10868862	10869982	920	+	75	0.765358	0.655435	0.0517241	0	0.0625272	0.0126143	0.0172917
CGI1297	Fbxo30	10	11000231	11002021	1590	+	165	0.870114	0.693711	0.0263158	0.0108661	0.0715986	0.00926834	0.0113636
CGI1298	Epm2a	10	11062803	11063944	941	+	103	0.917123	0.691817	0.0112682	0.0232787	0.144805	0.0103688	0.0297872
CGI1299		10	11211672	11212087	215	+	22	0.742516	0.744186	0.716787	0.0952381	0.658323	0.397402	0.868687
CGI1300		10	12587212	12587627	215	+	11	0.546847	0.623256	0.0889384	0	0.119444	0.00833333	0
CGI1301		10	12587796	12589641	1645	+	124	0.733886	0.643769	0.0257958	0	0.058724	0.020401	0
CGI1302		10	12642111	12643183	872	+	61	0.808666	0.58945	0.0469188	0	0.0134792	0.0207161	0.0138889
CGI1303	Stx11	10	12660753	12661860	907	+	70	0.856443	0.600882	0.0331148	0.0163934	0.101	0.0181551	0.116828
CGI1304	Stx11	10	12683642	12684756	914	+	70	0.722424	0.652079	0.0519531	0	0.0487528	0.00874232	0.0128968
CGI1305		10	12715305	12715769	264	+	12	0.656356	0.55303	0.0833333	0	0.305227	0.0161064	0.292725
CGI1306	Sf3b5	10	12727973	12729043	870	+	73	0.938801	0.598851	0.0323524	0.00210603	0.0332776	0.0127168	0.0506329
CGI1307		10	12780439	12781247	608	+	43	0.712302	0.631579	0	0	0.0238715	0.0294869	0.0277778
CGI1308	Plagl1	10	12810051	12811257	1006	+	78	0.784347	0.629225	0.981655	0.0149254	0.0856579	0.330786	0.512538	Oocyte-methylated, gDMR, ICR
CGI1309	Plagl1	10	12846908	12847428	320	+	16	0.577084	0.590625	0.820175	0	0.0909091	0.454918	0.381341	Oocyte-methylated, gDMR
CGI1310	Ltv1	10	12912426	12913238	612	+	44	0.710165	0.638889	0.00672878	0	0.0285714	0.0031675	0.0238095
CGI1311	Phactr2	10	13043533	13044405	672	+	65	0.810334	0.691964	0	0	0.122899	0.0369975	0.0432099
CGI1312		10	13139964	13140437	273	+	14	0.80185	0.527473	0	0	0.0708333	0.0797332	0.980247
CGI1313		10	13193178	13194679	1301	+	92	0.681273	0.645657	0.0508072	0	0.0512821	0.0210439	0.0303922
CGI1314	Fuca2	10	13220728	13221425	497	+	30	0.626208	0.62173	0.0378788	0	0	0.0161435	0
CGI1315	Pex3, Adat2	10	13272557	13273391	634	+	48	0.842456	0.600946	0.024339	0	0.0326652	0.0114914	0.0362319
CGI1316	Aig1	10	13459704	13460079	175	+	8	0.483035	0.617143	0.0052041		0.970484	0.0852812	0.743165	Sperm-methylated, gDMR
CGI1317	Aig1	10	13587942	13589131	989	+	79	0.76389	0.647118	0.0105634	0	0.13369	0.0161983	0.209677
CGI1318	Hivep2	10	13684249	13688112	3663	+	286	0.75034	0.645919	0.203922	0.0156503	0.0311061	0.0489717	0.0194448
CGI1319	Hivep2	10	13702461	13703079	418	+	27	0.600672	0.657895	0.453931	0	0.016	0.197386	0
CGI1320	Gpr126	10	14264441	14265610	969	+	89	0.831969	0.665635	0.0211149		0.0213675	0.01677	0.0196078
CGI1321	Vta1	10	14424844	14425598	554	+	45	0.830565	0.629964	0.00291783		0.00761905	0.020566	0.0318182
CGI1322	Nmbr	10	14479796	14480502	506	+	27	0.659078	0.571146	0.0226891	0	0.107106	0.0145582	0.0793651
CGI1323		10	17353751	17354182	231	+	10	0.633892	0.52381	0.485483	0	0.0561869	0.110683	0.470551
CGI1324	Cited2	10	17441729	17444699	2770	+	192	0.725013	0.618773	0.0558411	0.00373134	0.0405934	0.0222731	0.016099
CGI1325	Heca	10	17666796	17668495	1499	+	173	0.968826	0.691795	0.0400803	0	0.062155	0.018464	0.0261667
CGI1326	3110003A17Rik	10	17742014	17743317	1103	+	61	0.614509	0.608341	0.104701	0	0.0850177	0.023926	0.0217391
CGI1327	Reps1	10	17774704	17776380	1476	+	156	0.939062	0.671409	0.0292398	0	0.0628283	0.014027	0.0148881
CGI1328	Ccdc28a	10	17933440	17934128	488	+	26	0.722061	0.545082	0.851485		0.272569	0.123647	0.225	Oocyte-methylated
CGI1329	Ccdc28a	10	17954481	17955463	782	+	39	0.631048	0.56266	0.00152996	0.000625391	0.0415388	0.00895644	0.00720721
CGI1330		10	18037874	18039638	1564	+	158	0.823937	0.700767	0.0327184	0.026	0.0861398	0.0328322	0.0533333
CGI1331	Nhsl1	10	18150630	18151139	309	+	16	0.582576	0.598706	0.9375	0	0.653324	0.181433	0.0660494	Oocyte-methylated
CGI1332	Nhsl1	10	18182808	18183206	198	+	10	0.717912	0.545455	1	0	0.04662	0.235144	0.200521	Oocyte-methylated, gDMR
CGI1333	Nhsl1	10	18246083	18246798	515	+	22	0.487421	0.596117	0.948611	0.0461538	0.230159	0.356458	0.486281	Oocyte-methylated
CGI1334	Nhsl1	10	18251016	18251864	648	+	31	0.518626	0.608025	0.936747	0	0.0803855	0.370415	0.522222	Oocyte-methylated, gDMR
CGI1335	Hebp2	10	18265438	18266039	401	+	21	0.508803	0.643392	0	0	0.0104167	0.0296002	0.125
CGI1336	D10Bwg1379e	10	18463165	18463924	559	+	42	0.674237	0.670841	0.0305556	0.0666667	0.0614966	0.0176143	0.0386703
CGI1337	Perp	10	18564219	18565453	1034	+	70	0.686854	0.628627	0.0251798	0.0379677	0.00754794	0.0103263	0.0554214
CGI1338	Tnfaip3	10	18734478	18735590	912	+	68	0.790397	0.615132	0.025	0	0.103226	0.0174895	0.0460526
CGI1339		10	18981645	18982049	204	+	12	0.750934	0.563725	0.919231	0	0.119675	0.336301	0.821781	Oocyte-methylated, gDMR
CGI1340		10	19072658	19073236	378	+	15	0.516634	0.568783	0		0.0264791	0.0268004	0.0125
CGI1341	Olig3	10	19076385	19077616	1031	+	66	0.641985	0.633366	0.0164334	0.0285714	0.0406061	0.0141634	0.0424187
CGI1342	Ifngr1	10	19311363	19312316	753	+	52	0.684977	0.640106	0.0338102	0	0.0306667	0.0188369	0.00985915
CGI1343	Il20ra	10	19432211	19432708	297	+	25	0.69627	0.69697	0.0391414	0.0535714	0.0909091	0.0204745	0.0321429
CGI1344	Slc35d3	10	19568661	19571882	3021	+	200	0.651473	0.638861	0.0381219	0.0176265	0.0267101	0.0222061	0.023822
CGI1345	Pex7	10	19626734	19627677	743	+	62	0.957809	0.590848	0.0261653	0.030303	0.0623783	0.0191443	0.0588235
CGI1346	Map3k5	10	19653209	19655233	1824	+	194	0.907756	0.688596	0.0326518	0	0.0213319	0.0196759	0.0193158
CGI1347	Mtap7	10	19868002	19869738	1536	+	181	0.999792	0.6875	0.0283244	0.0164931	0.0347601	0.014746	0.0237699
CGI1348	Mtap7	10	19890581	19890950	169	+	7	0.563467	0.573964	0.333333	0	0.95	0.242279	0.458333	Sperm-methylated
CGI1349	Bclaf1	10	20031534	20033233	1499	+	144	0.962001	0.632422	0.0298039	0.0144512	0.0281746	0.0147605	0.017094
CGI1350	Fam54a	10	20067076	20068095	819	+	57	0.914822	0.553114	0.025007	0.0121951	0.0645541	0.00746749	0
CGI1351	Pde7b	10	20119711	20120527	616	+	36	0.670573	0.592532	0.0108108	0.0291542	0.010101	0.0131156	0.286601
CGI1352	Pde7b	10	20150962	20151330	168	+	10	0.777754	0.559524	0.0153846	0	0.0648352	0.0320513	0.678224
CGI1353	Ahi1	10	20671751	20672982	1031	+	93	0.903219	0.633366	0.0157791	0.0222222	0.0441167	0.0658812	0.0205128
CGI1354	Ahi1	10	20673967	20674488	321	+	26	1.07197	0.563863	0.861743	0	0.0455586	0.433017	0.666667	Oocyte-methylated, gDMR
CGI1355	Ahi1	10	20713803	20714159	156	+	9	0.532225	0.666667	0	0	0.108772	0.0598181	0.368768
CGI1356	Myb	10	20864670	20865112	242	+	12	0.521655	0.623967	0		0.0102564	0.0256649	0
CGI1357	Myb	10	20878526	20881737	3011	+	203	0.742387	0.604782	0.0263323	0.0260667	0.0503585	0.0158351	0.0148113
CGI1358	Hbs1l	10	21015515	21016583	868	+	84	0.993956	0.624424	0.0236124	0.025974	0.0417297	0.00923844	0
CGI1359	Aldh8a1	10	21101905	21102260	155	+	8	0.742888	0.529032	0.0640136	1	0.140432	0.0334775	0.572024
CGI1360		10	21138974	21139448	274	+	13	0.657178	0.543796	0.124754	0	0.00649351	0.0226592	0.0722222
CGI1361		10	21190546	21190966	220	+	12	0.69172	0.568182	0.0355429	0	0.284524	0.0540789	0.405303
CGI1362		10	21312755	21313393	438	+	25	0.646238	0.60274	0.0597977	0	0.0112069	0.0379302	0.659091
CGI1363	Sgk1	10	21601911	21602499	388	+	26	0.732691	0.60567	0.0185185		0.0238095	0.0317832	0.00707103
CGI1364	Sgk1	10	21712566	21713232	466	+	26	0.624142	0.598712	0.896852	0	0.017278	0.137548	0.0208333	Oocyte-methylated, gDMR
CGI1365	Sgk1	10	21713330	21714837	1307	+	100	0.826619	0.609028	0.910619	0.0125286	0.0956776	0.116527	0.015	Oocyte-methylated, gDMR
CGI1366		10	21778044	21778857	613	+	37	0.620034	0.634584	0.040404		0.0144231	0.0195327	0.0306625
CGI1367		10	21860493	21860961	268	+	13	0.487801	0.649254	0.516816	0	0.408333	0.106114	0.0714286
CGI1368		10	21862037	21862889	652	+	7	0.207811	0.455521	0.362386	0.296138	0.931248	0.215685	0.773642	Sperm-methylated
CGI1369		10	21868000	21870283	2083	+	137	0.703733	0.611618	0.0359792	0.0740741	0.041442	0.0153074	0.00584795
CGI1370		10	21870405	21870855	250	+	22	0.944593	0.612	0	0	0.00444444	0.0229384	0
CGI1371		10	21870903	21871782	679	+	48	0.65796	0.656848	0.0277778	0.00724638	0.0144562	0.0160234	0.0589431
CGI1372		10	21873899	21874493	394	+	47	1.03254	0.682741	0	0	0.0458874	0.0322581	0.166667
CGI1373	Raet1a	10	21878105	21878557	252	+	21	0.713549	0.694444	0.166667	0	0.0166667	0.0214362	0.0714286
CGI1374	Raet1a	10	21878893	21879355	262	+	18	0.749299	0.60687	0.161111	0.052	0.0242652	0.0100444	0.00757576
CGI1375	Raet1c, Raet1b, Raet1a, H60b	10	21993015	21993378	163	+	17	0.818106	0.730061	0.0118309	0.0909091	0	0.0148931	0
CGI1376	Raet1c, Raet1b, Raet1a, H60b	10	21993703	21994557	654	+	39	0.669595	0.600917	0.0909091	0.0425532	0.0226852	0.0353999	0
CGI1377	Slc2a12	10	22364607	22365545	738	+	44	0.720274	0.577236	0.0341518	0.00753855	0.0164683	0.049353	0.285001
CGI1378	Slc2a12	10	22399130	22399585	255	+	13	0.669628	0.552941	1	0.0666667	0.0808036	0.534587	0.48125	Oocyte-methylated, gDMR
CGI1379	Tbpl1	10	22450080	22452155	1875	+	155	0.841626	0.629867	0.981065	0.00994009	0.0346994	0.180007	0.0194088	Oocyte-methylated, gDMR
CGI1380		10	22535859	22536482	423	+	25	0.779416	0.55792	0		0.0965461	0.019618	0.0347222
CGI1381	Tcf21	10	22538882	22539857	775	+	49	0.670311	0.615484	0.0178021	0	0.00876733	0.0228234	0.107843
CGI1382		10	22673951	22674319	168	+	11	0.951903	0.559524	0.1		0.0395365	0.298609	0.781594
CGI1383	Eya4	10	23068090	23068687	397	+	25	0.756199	0.581864	0.0588235	0	0.005	0.0345784	0.00131579
CGI1384	Eya4	10	23068871	23070761	1690	+	121	0.724359	0.628994	0.0415092	0.0204082	0.0380484	0.0242633	0.0652174
CGI1385	Rps12	10	23506321	23507776	1255	+	78	0.836447	0.545817	0.0304666	0.0282613	0.0241948	0.0166606	0.015942
CGI1386	1110021L09Rik	10	23516493	23517367	674	+	36	0.715044	0.547478	0.997368	0.0333333	0.0385057	0.162246	0.0504902	Oocyte-methylated, gDMR
CGI1387	Vnn1	10	23614657	23615137	280	+	13	0.591395	0.564286	0	0	0.0138889	0.0299679	0.32
CGI1388	Taar2	10	23660478	23660925	247	+	13	0.943533	0.477733	0.0548833	0.166667	0.0981045	0.0200849	0.669583
CGI1389	Stx7	10	23868881	23869686	605	+	45	0.662329	0.671074	0.0576256	0	0.00777323	0.00537698	0.0251572
CGI1390	Moxd1	10	23943111	23944004	693	+	56	0.69784	0.68254	0.00292073	0.0173981	0.0149711	0.0380681	0.0978694
CGI1391	Ctgf	10	24315068	24316446	1178	+	73	0.641856	0.628183	0.0545367	0.000896068	0.0631774	0.0123048	0.022619
CGI1392		10	24345028	24345393	165	+	8	0.902207	0.472727	0.0665117	0.00553722	0	0.00957049	0.266049
CGI1393	Enpp1	10	24431211	24432418	1007	+	88	0.858238	0.640516	0.0293232	0	0.0327381	0.015081	0.040404
CGI1394	Med23	10	24589411	24590261	650	+	43	0.703379	0.613846	0.0291126	0.0969388	0.00410053	0.0161729	0.00952381
CGI1395		10	24806328	24806867	339	+	15	0.467894	0.616519	0.0620367	0	0.0147059	0.334726	0.539827
CGI1396	Akap7	10	24919668	24920200	332	+	21	0.620503	0.641566	1	0.00505408	0.0297619	0.261786	0.040404	Oocyte-methylated, gDMR
CGI1397	Akap7	10	24994695	24995089	194	+	5	0.367657	0.530928	0.125	0	0.0572917	0.0735488	0.166667
CGI1398	Akap7	10	25016349	25017276	727	+	81	0.948101	0.691884	0.0334967	0.0191832	0.0159368	0.0242575	0
CGI1399		10	25034095	25034471	176	+	10	0.796247	0.545455	0.0892857	0	0.140188	0.0221561	0.0277778
CGI1400		10	25079127	25080538	1211	+	133	0.899251	0.701899	0.0206398	0.0178571	0.0265036	0.0150262	0.016129
CGI1401	Tmem200a	10	25713641	25714266	425	+	19	0.581678	0.555294	0.0680272		0.0277778	0.0297418	0.589247
CGI1402	Tmem200a	10	25797570	25799044	1274	+	99	0.745562	0.645997	0.022057	0	0.0109447	0.0222034	0.0470297
CGI1403	L3mbtl3	10	26093189	26096247	2858	+	281	0.990374	0.636459	0.0223875	0.0302682	0.022315	0.0209174	0.0167929
CGI1404		10	26415070	26415718	448	+	21	0.545662	0.587054	0.015873	0	0.014277	0.022021	0.0547619
CGI1405	Lama2	10	27336363	27336750	187	+	13	0.626685	0.668449	0		0.0277778	0.0217087	0.36
CGI1406	Ptprk	10	27793918	27795482	1364	+	107	0.809851	0.6239	0.0188834	0.03125	0.00752422	0.0196951	0.0189873
CGI1407	Ptprk	10	27795537	27796445	708	+	28	0.55874	0.532486	0.0328125	0.0555556	0.0408986	0.0327646	0.0367424
CGI1408		10	28863246	28863656	210	+	15	0.800878	0.609524	0	0.0263158	0.00328947	0.0667593	0.0284226
CGI1409	6330407J23Rik	10	28863796	28864182	186	+	8	0.503718	0.586022	0	0	0.045764	0.0134386	0.0167535
CGI1410	6330407J23Rik	10	28866266	28867618	1152	+	88	0.690363	0.666667	0.0616239	0.0211864	0.0163707	0.0239588	0.0123093
CGI1411	6330407J23Rik	10	28867809	28868391	382	+	21	0.704234	0.581152	0.0119048	0.115385	0.0945048	0.0233764	0.05
CGI1412	6330407J23Rik	10	28916202	28917438	1036	+	76	0.789384	0.610039	0.0847479	0.0648331	0.115068	0.0309255	0.478259
CGI1413	Echdc1	10	29032828	29033600	572	+	49	0.806118	0.659091	0.0219036	0.00653595	0.0470431	0.015162	0.0335979
CGI1414	Rnf146	10	29081097	29082381	1084	+	112	0.872363	0.690037	0.0164141	0.0416667	0.0531008	0.00890459	0
CGI1415	Rspo3	10	29253235	29253639	204	+	8	0.480105	0.573529	0.00892857	0	0.037037	0.0322667	0
CGI1416	Rspo3	10	29254182	29254679	297	+	14	0.522813	0.602694	0	0	0.142857	0.0141214	0
CGI1417	Rspo3	10	29255128	29256045	717	+	51	0.747918	0.638773	0	0.0340909	0.0255342	0.0222344	0.00378788
CGI1418	Cenpw	10	29919866	29920657	591	+	48	0.821464	0.629442	0	0.0416667	0.025345	0.0124388	0.0108696
CGI1419	Trmt11	10	30319853	30320865	812	+	53	0.710994	0.610837	0.0688963	0.0143678	0.0264004	0.0672384	0.0144928
CGI1420	Hint3	10	30337773	30338600	627	+	44	0.773899	0.602871	0.0311304	0	0.029484	0.0215459	0.0636364
CGI1421	Ncoa7	10	30522251	30523645	1194	+	101	0.761949	0.666667	0.0181818	0.0106383	0.0139635	0.0182681	0.0396825
CGI1422	Hey2	10	30561885	30563381	1296	+	103	0.818031	0.625772	0.0253165	0.0384615	0.0268229	0.0161189	0.0755153
CGI1423		10	30563652	30564435	583	+	22	0.513265	0.543739	0.0288462	0.0334279	0.0448291	0.0333598	0.0537778
CGI1424	Hddc2	10	31032907	31033926	819	+	42	0.616542	0.590965	0		0.0328283	0.0458141	0.00793651
CGI1425	Tpd52l1	10	31164901	31166084	983	+	65	0.688839	0.622584	0.0258893	0.047619	0.0243764	0.027635	0
CGI1426	Rnf217	10	31328006	31329943	1737	+	175	0.796396	0.711572	0.047619	0	0.027381	0.028921	0.025974
CGI1427	Nkain2	10	32609396	32610645	1049	+	86	0.766509	0.655863	0.61174	0.0434783	0.0311189	0.170639	0.0460317
CGI1428	Clvs2	10	33344056	33344589	333	+	24	0.709387	0.63964	0		0.0102363	0.0192864	0.0740741
CGI1429	Zufsp	10	33670541	33671239	498	+	35	0.716957	0.628514	0	0	0.0530868	0.00584082	0.0478723
CGI1430	Rwdd1	10	33738713	33740011	1098	+	96	0.86175	0.638434	0.0109831	0.0215794	0.0165249	0.0218616	0.015625
CGI1431		10	33753628	33754165	337	+	15	0.595495	0.548961	0	0	0.00444444	0.14426	0.0540675
CGI1432	Fam26f	10	33847030	33847900	670	+	43	0.673429	0.61791	0.0164244	0.0269343	0.0170635	0.013466	0.239394
CGI1433	Dse	10	33926262	33927453	991	+	81	0.687193	0.690212	0.033604		0.0725	0.028032	0
CGI1434	Tspyl1	10	34001600	34002833	1033	+	81	0.823913	0.624395	0.0240712	0.00961538	0.0686275	0.0183085	0.018872
CGI1435	Tspyl4	10	34017033	34018056	823	+	45	0.652267	0.584447	0.025193	0	0.0235884	0.174552	0.0104433
CGI1436	Nt5dc1	10	34137898	34138677	579	+	50	0.830567	0.647668	0.0138889	0	0.06875	0.0393183	0.0277778
CGI1437	Hs3st5	10	36226241	36227668	1227	+	88	0.691177	0.644662	0.0253899	0.0106383	0.0506457	0.0167694	0.00470085
CGI1438	Hdac2	10	36693672	36695314	1442	+	130	0.806721	0.669209	0.0171789	0.018239	0.0463652	0.0188631	0.0278986
CGI1439	Marcks	10	36855573	36857748	1975	+	193	0.910456	0.655696	0.0214519	0.0238095	0.0464165	0.00893933	0.016129
CGI1440	Marcks	10	36858069	36858953	684	+	46	0.890014	0.554094	0.0212695	0.0350877	0.0179875	0.00960428	0.0354167
CGI1441		10	36859978	36860458	280	+	9	0.707422	0.428571	0.0454545	0	0.0457126	0.0201904	0.0527778
CGI1442		10	36860328	36861097	569	+	37	0.676831	0.622144	0	0.0588235	0.0148208	0.0101246	0.000733138
CGI1443	Lama4	10	38685145	38686171	826	+	31	0.447511	0.579903	0.0595238	0	0.159781	0.0152634	0.0411756
CGI1444	Lama4	10	38750148	38750506	158	+	12	0.942726	0.56962	0.658133		0.102315	0.00347222	0.824074
CGI1445	1700025K23Rik, Tube1	10	38853477	38854263	586	+	38	0.704818	0.607509	0.0182812	0	0.14096	0.0180562	0
CGI1446		10	38890903	38891419	316	+	17	0.658004	0.572785	0.0333333		0.0640942	0.046193	0
CGI1447	Fyn	10	39089039	39090566	1327	+	120	0.786598	0.681989	0.0285714	0.0213971	0.0917477	0.0123057	0.0157143
CGI1448	Rev3l	10	39450761	39453218	2257	+	242	0.924045	0.681436	0.0314031	0.0158355	0.011511	0.0107146	0.0115942
CGI1449		10	39618425	39619337	712	+	51	0.709579	0.636236	0.0208333	0.0645161	0.0584438	0.0629985	0.0947712
CGI1450	2010001E11Rik	10	39646144	39647152	808	+	49	0.632032	0.623762	0	0.0222222	0.139587	0.0121429	0.12619
CGI1451	G630090E17Rik, BC021785	10	39679393	39680309	716	+	40	0.641182	0.590782	0.0118014	0.0285714	0.0221211	0.032193	0.0351177
CGI1452	AI317395	10	39744441	39745383	742	+	46	0.616143	0.636119	0.0355553	0	0.0797101	0.0149547	0.158036
CGI1453	Slc16a10	10	39861192	39862460	1068	+	94	0.80015	0.664794	0.0179487	0.01875	0.0184397	0.0166783	0.0268657
CGI1454	Rpf2	10	39966331	39967179	648	+	55	1.03861	0.572531	0.0123829	0.0353448	0.0940476	0.0130549	0.0347917
CGI1455	Gtf3c6	10	39977094	39977856	562	+	36	0.794359	0.576512	0.0468632	0	0.0457451	0.0161119	0.013711
CGI1456	Amd1, Amd2	10	40020377	40021683	1106	+	111	0.873849	0.685353	0.0582548	0.0306671	0.0126538	0.0347886	0
CGI1457	Amd1, Amd2	10	40021866	40022788	722	+	48	0.847764	0.567867	0.016129	0.0382031	0.0124717	0.0100034	0
CGI1458	Cdk19	10	40068464	40070151	1487	+	139	0.901937	0.64963	0.0219768	0.00793651	0.0554355	0.0183889	0.0100719
CGI1459	Cdk19	10	40145171	40145526	155	+	8	0.550287	0.63871	1		0.0487179	0.184266	0.103914	Oocyte-methylated, gDMR
CGI1460		10	40256643	40257295	452	+	17	0.474845	0.573009	0	0	0.0619048	0.0158312	0.413938
CGI1461	Slc22a16	10	40289981	40290495	314	+	17	0.565058	0.630573	0	0	0.0555556	0.0125313	0.365079
CGI1462	9030224M15Rik	10	40402678	40403667	789	+	54	0.624032	0.662864	0.035062		0.0526316	0.0151672	0.0155556
CGI1463	9030224M15Rik	10	40530175	40530568	193	+	12	0.937223	0.518135	0	0	0.465104	0.132715	0.508772
CGI1464	Cdc40, Wasf1	10	40602445	40604636	1991	+	174	0.904623	0.621798	0.0339776	0	0.022906	0.0189982	0.011215
CGI1465	Gpr6	10	40790278	40791836	1358	+	80	0.674735	0.591311	0.016914	0.0287027	0.0388655	0.0540232	0.0874508
CGI1466		10	40791755	40792335	380	+	24	0.624936	0.636842	0.030303	0.02	0.0688889	0.0746566	0
CGI1467		10	40871272	40871664	192	+	10	0.674843	0.557292	0.25463	0	0.0315296	0.0666923	0.266667
CGI1468	Fig4	10	41022448	41023239	591	+	38	0.59141	0.661591	0	0	0.041422	0.0056391	0.0142857
CGI1469	Zbtb24	10	41169974	41170800	626	+	55	0.921765	0.618211	0.112794	0	0.0541829	0.0411426	0.0136143
CGI1470	Mical1	10	41195631	41196598	767	+	39	0.513669	0.629726	0.0172414	0.01875	0.0853659	0.0128064	0.030303
CGI1471	Mical1	10	41197089	41197454	165	+	5	0.443867	0.539394	0	0	0.05	0.0231262	0.0833333
CGI1472	Smpd2, Ppil6	10	41209318	41210757	1239	+	78	0.719301	0.592413	0.0147059	0.0276163	0.163097	0.0192484	0.0205351
CGI1473	Cd164	10	41238266	41240107	1641	+	151	0.925827	0.630713	0.0201342	0.0063681	0.121043	0.0217389	0.038961
CGI1474		10	41404262	41404687	225	+	14	0.766488	0.595556	0.9993	0.5	0.0818383	0.257368	0.120445	Oocyte-methylated, gDMR
CGI1475	2410017P07Rik, Sesn1	10	41529176	41530993	1617	+	105	0.77947	0.578231	0.00783222	0.0265047	0.0418103	0.0163726	0.0305501
CGI1476	Sesn1	10	41606787	41607772	785	+	68	0.776681	0.66879	0.0304233	0.0238095	0.0340741	0.0141216	0.0448361
CGI1477	Armc2	10	41737586	41738533	747	+	51	0.688742	0.630522	0.0238095		0.00198413	0.0104434	0.088604
CGI1478		10	41750823	41751376	353	+	15	0.474959	0.611898	0.0423077	0	0.602179	0.0554859	0.246688
CGI1479	Foxo3	10	41994106	41998649	4343	+	374	0.811291	0.652084	0.0212466	0.0102201	0.0346696	0.0161556	0.0153695
CGI1480	Lace1	10	42197776	42198638	662	+	46	0.722224	0.620846	0.000392404		0.0459795	0.0174728	0.00909091
CGI1481	Snx3	10	42221327	42223005	1478	+	126	0.900366	0.615697	0.0928194	0.0416667	0.121518	0.0099461	0.0440696
CGI1482	Nr2e1	10	42292344	42293179	635	+	35	0.611003	0.60315	0.000482625	0.00444079	0.0444898	0.0120209	0.077845
CGI1483	Nr2e1	10	42299145	42300481	1136	+	65	0.585586	0.626761	0.059632	0.0257937	0.0216049	0.0245921	0.0661232
CGI1484	Nr2e1	10	42301673	42304857	2984	+	192	0.721494	0.59752	0.0186329	0.0271689	0.0200065	0.0157308	0.0203667
CGI1485		10	42310960	42312436	1276	+	87	0.734233	0.615987	0.0349721	0.027027	0.0269158	0.0106649	0.0298686
CGI1486		10	42333795	42334357	362	+	29	0.71341	0.671271	0.0100334	0	0.019675	0.0162792	0.0740646
CGI1487		10	42351413	42352159	546	+	25	0.510739	0.600733	0.0344828	0.0285714	0.067735	0.0524035	0.0594203
CGI1488		10	42352008	42352359	151	+	12	0.888928	0.615894	0	0.0833333	0.0769231	0.0394474	0.0129032
CGI1489		10	42352748	42353281	333	+	19	0.534315	0.654655	0.0666667		0.118421	0.0181744	0.06
CGI1490		10	42353507	42353986	279	+	11	0.705137	0.487455	0	0	0	0	0.493333
CGI1491		10	42355491	42356169	478	+	42	0.730743	0.694561	0.111111	0	0.0387097	0.0171249	0
CGI1492		10	42356441	42357154	513	+	21	0.619635	0.51462	0.0528917	0.0555556	0.0366497	0.0318895	0.0797101
CGI1493	Ostm1	10	42398334	42399320	786	+	60	0.710932	0.656489	0.0235377	0	0.022973	0.0225112	0.0666667
CGI1494	Sec63	10	42480882	42482393	1311	+	138	0.920075	0.681922	0.0137973	0.00694444	0.0734404	0.0191719	0.0272727
CGI1495	Scml4	10	42583807	42584363	356	+	16	0.594819	0.550562	0	0.00854701	0.0555556	0.0522727	0
CGI1496	Scml4	10	42650011	42650526	315	+	18	0.617194	0.609524	0.015942	0	0.0607978	0.0248124	0.45309
CGI1497	Sobp	10	42740548	42742576	1828	+	159	0.787276	0.672867	0.043401	0.0566038	0.0729953	0.0186687	0.0546078
CGI1498	Sobp, 9030612E09Rik	10	42892778	42895570	2592	+	206	0.746703	0.652778	0.0979647	0.0355705	0.0243951	0.0197077	0.0415971
CGI1499	Pdss2	10	42940717	42942018	1101	+	74	0.704507	0.619437	0.062444	0.00801688	0.0723008	0.0172809	0.0189394
CGI1500	Bend3	10	43198061	43200048	1787	+	236	0.968465	0.739228	0.0199795	0.0763605	0.106049	0.0174064	0.0706173
CGI1501	Bend3	10	43230936	43231705	569	+	36	0.673761	0.615114	1	0.00250349	0.496396	0.355109	0.32382	Oocyte-methylated
CGI1502	1700021F05Rik	10	43260037	43261140	903	+	63	0.687163	0.637874	0.15303	0.0153846	0.0929391	0.0232516	0.0043573
CGI1503	Cd24a	10	43298019	43300045	1826	+	144	0.759227	0.645126	0.0332581	0.0319967	0.0494174	0.00691503	0.014974
CGI1504	Cd24a	10	43300504	43300936	232	+	10	0.596835	0.538793	0.0506436		0	0.00481481	0.00892857
CGI1505		10	43443224	43443676	252	+	11	0.536853	0.575397	0.0484155	0	0.0611618	0.0246734	0.143566
CGI1506	Rtn4ip1, Qrsl1	10	43620998	43621838	640	+	53	0.879858	0.614062	0.0239014	0.0217094	0.00245098	0.0177326	0.016196
CGI1507	Aim1	10	43723084	43724627	1343	+	120	0.811627	0.664929	0.0209515	0.00127551	0.0337685	0.022894	0.0210575
CGI1508		10	43725383	43726025	442	+	25	0.545731	0.644796	0.0339367	0	0.0604167	0.0194978	0
CGI1509		10	43868163	43869152	789	+	49	0.584603	0.652725	0.0823413	0	0.052381	0.0347899	0.135135
CGI1510	Atg5	10	43987677	43988802	925	+	68	0.852025	0.59027	0.0284512	0.0454545	0.0220219	0.0204428	0.0102041
CGI1511	Prdm1	10	44176882	44177406	324	+	18	0.655101	0.583333	0.000847458	0.0459051	0.115801	0.0199664	0.0945455
CGI1512	Prdm1	10	44178130	44179016	686	+	50	0.846394	0.591837	0.0402462	0.0217707	0.0469992	0.0197222	0.0223005
CGI1513		10	44246718	44247342	424	+	22	0.633472	0.573113	0.887922	0.2	0.0512821	0.272946	0.0288767	Oocyte-methylated, gDMR
CGI1514		10	44248963	44249833	670	+	41	0.732222	0.579104	0.593063	0.047619	0.015392	0.138153	0.0227273
CGI1515	Prep	10	44786291	44787892	1401	+	115	0.825386	0.630978	0.954141	0.0418731	0.0621961	0.08062	0.0235138	Oocyte-methylated, gDMR
CGI1516	Popdc3	10	45008876	45009887	811	+	71	0.795223	0.664612	0.0253692	0.0347222	0.0235294	0.0167293	0.0646663
CGI1517	Bves	10	45054883	45056166	1083	+	119	1.06275	0.643583	0.0253353	0	0.0199533	0.0167935	0.0965243
CGI1518		10	45205249	45206963	1514	+	206	1.08822	0.711361	0.0229776	0.0299546	0.0580903	0.0154316	0.0183903
CGI1519	Hace1	10	45297349	45298766	1217	+	107	0.925322	0.636812	0.702292	0	0.119494	0.0752088	0
CGI1520		10	45594978	45595358	180	+	12	0.79157	0.583333	0.107143	0	0	0.00555556	0.427083
CGI1521	Grik2	10	49502717	49503372	455	+	28	0.831254	0.545055	0.0763403	0.0104779	0.0591941	0.0105199	0.0160138
CGI1522	Grik2	10	49507942	49509135	993	+	54	0.623763	0.591138	0.0485588	0.0192872	0.0152174	0.0197184	0.0324074
CGI1523	Ascc3	10	50312046	50313161	915	+	78	0.915391	0.615301	0.0451365	0.00156416	0.0256762	0.0170467	0.0137026
CGI1524		10	50613888	50615345	1257	+	98	0.789493	0.630867	0.0359034	0.0188725	0.100836	0.0224278	0.0630081
CGI1525	Sim1	10	50620377	50621315	738	+	40	0.645472	0.579946	0.01875	0	0.0391156	0.026827	0.0436782
CGI1526	Sim1	10	50622628	50623572	744	+	35	0.624762	0.551075	0.0448365	0.00625	0.02175	0.101611	0.36348
CGI1527	Sim1	10	50624109	50624806	497	+	28	0.721705	0.559356	0	0.00115207	0.0316667	0.001443	0.23515
CGI1528	Sim1	10	50630149	50630694	345	+	16	0.582496	0.565217	0.0125	0	0.0809576	0.0286337	0.255747
CGI1529	Fam162b	10	51309988	51310411	223	+	16	0.712256	0.636771	0.958772	0.0225564	0	0.233139	0.25	Oocyte-methylated, gDMR
CGI1530		10	51397288	51397984	496	+	33	0.609886	0.66129	0.0361742	0.0285088	0.0257143	0.0486149	0.0267857
CGI1531	Vgll2	10	51741833	51742998	965	+	67	0.763088	0.611399	0.0320755	0	0.043738	0.0208262	0.0275974
CGI1532	Vgll2	10	51747017	51748035	818	+	68	0.698815	0.704156	0.0716483		0.0229885	0.0256657	0.0948276
CGI1533	Dcbld1	10	51953050	51954264	1014	+	93	0.773382	0.69428	0.0129902	0.0205765	0.0136364	0.018447	0.00666667
CGI1534	Dcbld1	10	52039110	52039953	643	+	26	0.48618	0.580093	0.988923	0.00123153	0.046875	0.26378	0.654321	Oocyte-methylated, gDMR
CGI1535	Gopc	10	52101044	52102437	1193	+	90	0.763211	0.630344	0.035712	0	0.0258575	0.0214383	0.0342105
CGI1536	Nus1	10	52136836	52138304	1268	+	112	0.869615	0.63959	0.044188		0.0239102	0.0198471	0.0045045
CGI1537	Zfa	10	52265352	52265864	312	+	24	0.782508	0.628205	0.0177571	0.037931	0.0902778	0.0799375	0.176587
CGI1538		10	52313678	52314135	257	+	11	0.575668	0.55642	0	0	0.127551	0.0326923	0.884961
CGI1539	Slc35f1	10	52409951	52411565	1414	+	99	0.63981	0.664074	0.0212285	0.0222222	0.0245902	0.0285909	0.0352941
CGI1540	Slc35f1	10	52424320	52424893	373	+	19	0.570218	0.608579	0.0455163		0	0.0226338	0.134568
CGI1541		10	53018837	53019243	206	+	12	0.86252	0.529126	1	0.00454545	0.100888	0.272812	0.961538	Oocyte-methylated, gDMR
CGI1542		10	53098818	53100050	1032	+	90	0.75266	0.681202	0.0768031	0.0434783	0.00509533	0.0122308	0
CGI1543	Asf1a, Mcm9	10	53316099	53317904	1605	+	170	0.950323	0.667913	0.0490011	0	0.0267198	0.0194839	0.0256303
CGI1544	Mcm9	10	53348981	53350227	1046	+	105	0.988047	0.644359	0.0176768	0	0.0277668	0.0128545	0
CGI1545	Fam184a	10	53470118	53471568	1250	+	106	0.771612	0.668	0.00127089	0.0769231	0.0502796	0.0259529	0.162846
CGI1546	Man1a	10	53793843	53796258	2215	+	168	0.741882	0.639729	0.0047906	0.023255	0.0429104	0.018708	0.0123457
CGI1547	D630037F22Rik, Msl3l2	10	55834627	55835868	1041	+	76	0.687324	0.652257	0.042094	0.0294494	0.0694752	0.0292988	0.0262764
CGI1548	D630037F22Rik	10	55948215	55948982	567	+	43	0.830581	0.604938	0.00582209	0.0434783	0.011864	0.0263544	0.000961538
CGI1549	Gja1	10	56098316	56099126	610	+	36	0.678975	0.590164	0.00347975	0	0.0622449	0.00666667	0
CGI1550	Gja1	10	56107963	56108575	412	+	21	0.683133	0.558252	0.00358108	0.0368326	0.12489	0.0218312	0.486315
CGI1551		10	56224256	56224779	323	+	17	0.728001	0.541796	0.00328947		0.0205128	0.0311851	0.768321
CGI1552	Hsf2	10	57205676	57206996	1120	+	118	0.961379	0.6625	0.0206122	0.02	0.0582298	0.0232698	0.0104167
CGI1553	Serinc1	10	57251730	57252617	687	+	62	0.935851	0.621543	0.0250563	0	0.0680714	0.0126178	0.0406385
CGI1554	Pkib	10	57351641	57352385	544	+	30	0.561086	0.630515	0.0108296	0	0.0555556	0.0368817	0.059482
CGI1555	Smpdl3a	10	57514222	57514946	524	+	33	0.617055	0.645038	0.0358277	0.0266204	0.0882353	0.0194394	0.0516891
CGI1556		10	57687046	57687544	298	+	17	0.597023	0.620805	0.134913	0.0331003	0.0509828	0.0425324	0.662767
CGI1557		10	57687643	57688279	436	+	12	0.338324	0.584862	0.0206656	0.0105009	0.0994048	0.0394158	0.628323
CGI1558	Dux	10	57694540	57695051	311	+	13	0.444839	0.614148	0.0695101	0.0529251	0.00714286	0.0401893	0.547917
CGI1559	Gm4981	10	57699390	57699768	178	+	4	0.326058	0.544944	0.194054	0.0737917	0.333333	0.0148361	0.687255
CGI1560	Gcc2	10	57717896	57718754	658	+	58	0.884463	0.632219	0.0722997		0.0349003	0.0138361	0.0717054
CGI1561	Lims1	10	57785747	57786921	974	+	87	0.889525	0.634497	0.041456	0	0.0622087	0.00717272	0.0187831
CGI1562	Lims1	10	57834264	57834634	170	+	8	0.651451	0.558824	0.642857		0.473568	0.0455173	0.231818
CGI1563	Ranbp2	10	57909102	57910395	1093	+	116	1.0467	0.637694	0.0533196	0.0263158	0.0195734	0.0220298	0.0181548
CGI1564	Ccdc138	10	57960459	57961171	512	+	40	0.829362	0.619141	0.00555556	0.00168985	0.00285714	0.0188059	0.00138889
CGI1565	Edar	10	58138155	58138734	379	+	20	0.55998	0.614776	0.00952381		0.0118534	0.0250805	0.0113636
CGI1566	Sh3rf3	10	58274809	58277290	2281	+	182	0.763604	0.646646	0.0110604	0.0171893	0.0773661	0.0147951	0.0618959
CGI1567	Sept10, Ankrd57	10	58683825	58686248	2223	+	173	0.739538	0.650922	0.0312177	0.0179375	0.0820415	0.0228733	0.0371096
CGI1568		10	58742915	58743589	474	+	16	0.431624	0.561181	0.24344	0.0110294	0.0127778	0.0210959	0.512716
CGI1569	P4ha1	10	58785562	58786939	1177	+	95	0.761293	0.651657	0.0336941	0	0.0352618	0.0155586	0.0600198
CGI1570	Oit3	10	58898501	58898968	267	+	16	0.845271	0.546816	0.0671927	0	0.0502924	0.0464049	0.790111
CGI1571	Ccdc109a	10	58966426	58966863	237	+	10	0.641175	0.514768	0.0175214	0	0.0738095	0.131852	0.184211
CGI1572	Ccdc109a	10	59002155	59002561	206	+	13	0.575014	0.669903	0.0546032	0.0888889	0.311379	0.0681846	0.047619
CGI1573	Ccdc109a	10	59052627	59053040	213	+	11	0.656823	0.56338	0.173679	0.894718	0.843245	0.114737	0.7825	Sperm-methylated, gDMR
CGI1574	Ccdc109a	10	59078427	59079788	1161	+	97	0.75236	0.667528	0.000215517	0	0.0440252	0.0161447	0.0282258
CGI1575	Cbara1	10	59164912	59165789	677	+	43	0.683405	0.615953	0.0333333		0.0647321	0.0180295	0.0153509
CGI1576	Dnajb12	10	59341844	59343248	1204	+	94	0.871617	0.598837	0.00737524	0.0135135	0.0151578	0.0153234	0.00687382
CGI1577		10	59362267	59362690	223	+	11	0.394816	0.70852	0.091149	0	0.710119	0.0306687	0
CGI1578		10	59374191	59374685	294	+	15	0.518095	0.646259	0	0.0909091	0	0.0158833	0
CGI1579		10	59383576	59384216	440	+	20	0.567461	0.581818	0.0661968	0.0769231	0.012987	0.00688645	0.0383658
CGI1580		10	59405017	59405533	316	+	17	0.84415	0.53481	0	0	0	0.03125	0.05
CGI1581	Ddit4	10	59413340	59415627	2087	+	132	0.639804	0.629133	0.0501089	0.0235447	0.0205992	0.0155137	0.0116368
CGI1582		10	59432718	59433195	277	+	18	0.781641	0.588448	0.00287816	0	0.1	0.0235244	0.0416667
CGI1583	Anapc16, Ascc1	10	59465266	59466405	939	+	68	0.760085	0.617678	0.0430212	0.0220775	0.0142344	0.00802257	0.0362319
CGI1584	Spock2	10	59568456	59570726	2070	+	128	0.617565	0.633816	0.043875	0.0135802	0.0525974	0.0289949	0.080783
CGI1585	Chst3	10	59648401	59649721	1120	+	71	0.68062	0.610714	0.032073	0.0339623	0.0705244	0.00910358	0.26745
CGI1586		10	59654368	59654960	392	+	19	0.600631	0.591837	0.0710681	0.0413223	0.028638	0.0231318	0.0346928
CGI1587		10	59680896	59682555	1459	+	98	0.651667	0.643592	0.0371151	0.0287356	0.094697	0.0178205	0.0677966
CGI1588		10	59720031	59720534	303	+	13	0.545712	0.570957	0	0	0.0167411	0.0202202	0.104728
CGI1589	Psap	10	59740048	59741090	842	+	60	0.731772	0.624703	0.0185185	0	0.0224057	0.0159949	0.0187371
CGI1590	Cdh23	10	59773561	59773961	200	+	13	0.707764	0.615	1	0	0.986667	0.439868	0.756	Oocyte and sperm-methylated
CGI1591	Cdh23, 4632428N05Rik	10	59809166	59810131	765	+	39	0.532372	0.622222	0.856803	0	0.0729167	0.121911	0.0916667	Oocyte-methylated, gDMR
CGI1592	Cdh23	10	60029089	60029704	415	+	16	0.479334	0.571084	0.923077	0.0175439	0.191366	0.327251	0.251361	Oocyte-methylated, gDMR
CGI1593	Cdh23	10	60148368	60150774	2206	+	174	0.750865	0.648685	0.021788	0.0545455	0.0542717	0.0237613	0.0756809
CGI1594	Cdh23	10	60154165	60154646	281	+	13	0.622842	0.580071	0		0.0266955	0.0106498	0.229789
CGI1595	Slc29a3	10	60215132	60215796	464	+	31	0.605675	0.670259	0.0208333	0	0.037037	0.0224031	0.0153061
CGI1596	Unc5b	10	60242698	60243226	328	+	20	0.680321	0.60061	1	0.0325521	0.133333	0.305256	0.151235	Oocyte-methylated, gDMR
CGI1597	Unc5b	10	60270547	60271082	335	+	17	0.539687	0.614925	0.892857	0.0312514	0.993333	0.279875	0.690774	Oocyte and sperm-methylated
CGI1598	Unc5b	10	60289038	60290087	849	+	37	0.487983	0.605418	0.53561	0.0454545	0.0818487	0.086337	0.00981658
CGI1599	Unc5b	10	60293050	60294734	1484	+	147	0.937207	0.653639	0.0287899	0	0.0336279	0.0229933	0.0566667
CGI1600	Pcbd1	10	60551885	60552531	446	+	27	0.534171	0.674888	0.00279545	0	0	0.0124411	0
CGI1601	Sgpl1	10	60608792	60610908	1916	+	149	0.660081	0.7119	0.103653	0.0333333	0.0130596	0.0287458	0.0218414
CGI1602	Tbata	10	60638520	60638980	260	+	16	0.662026	0.611538	0.0111833	0	0	0.0197913	0.159091
CGI1603	Adamts14	10	60708420	60709013	393	+	24	0.672503	0.605598	0.0114943		0.1875	0.0197792	0.238776
CGI1604	Adamts14	10	60735536	60736898	1162	+	84	0.674772	0.654905	0.0381156	0	0.081684	0.0209228	0.122917
CGI1605	X99384	10	60845490	60846671	981	+	72	0.678177	0.662589	0.0232558	0	0.0147059	0.0166219	0.0153846
CGI1606	Nodal	10	60880856	60882256	1200	+	78	0.714195	0.604167	0.0255456	0.208333	0.0451939	0.0140699	0.00968992
CGI1607	Eif4ebp2	10	60914607	60915941	1134	+	103	0.85788	0.654321	0.0609091	0	0.058672	0.00827553	0.0114944
CGI1608	Lrrc20	10	60937975	60939604	1429	+	96	0.704304	0.617915	0.0628292	0.010923	0.0740945	0.0290703	0.0315972
CGI1609	Npffr1	10	61057571	61058391	620	+	42	0.633306	0.66129	0.0833333		0.0630411	0.0369654	0.0761257
CGI1610	Npffr1	10	61076568	61077177	409	+	21	0.617208	0.599022	0.0123457	0.317628	0.252491	0.0691423	0.549184
CGI1611	Npffr1	10	61087871	61089209	1138	+	84	0.7544	0.627417	0.0281524	0.024311	0.0118687	0.0190148	0.106757
CGI1612	Ppa1	10	61110985	61112191	1006	+	88	0.83026	0.650099	0.057971	0.0185185	0.0286458	0.0187778	0.0106383
CGI1613	Sar1a	10	61142637	61143736	899	+	83	0.84554	0.664071	0.0187277	0	0.00678571	0.0205961	0.0085119
CGI1614	Tysnd1	10	61157775	61159966	1991	+	174	0.826399	0.650929	0.0657637	0.0111016	0.0651414	0.0191266	0.0390952
CGI1615	Aifm2	10	61177757	61178435	478	+	37	0.759864	0.658996	0.00357143	0	0.0217391	0.0266178	0.00992063
CGI1616	H2afy2	10	61215756	61216377	421	+	27	0.738532	0.591449	0	0.00101382	0.1	0.0122172	0.240741
CGI1617	H2afy2	10	61245374	61247290	1716	+	139	0.780524	0.644522	0.0127586	0.0234346	0.140944	0.0311019	0.0224681
CGI1618	Col13a1	10	61440307	61442467	1960	+	129	0.692349	0.616837	0.607065	0.0158726	0.0157834	0.196014	0.0197273
CGI1619	2010107G23Rik	10	61573098	61574109	811	+	60	0.672771	0.668311	0.351529	0.0342593	0.057963	0.205254	0.0624438
CGI1620		10	61590534	61590885	151	+	13	1.00821	0.589404	0.692708	0	0.0571429	0.286353	0.820513
CGI1621		10	61591246	61591914	468	+	27	0.626388	0.608974	1	0	0.0227273	0.32567	0.034188	Oocyte-methylated, gDMR
CGI1622	Neurog3	10	61595412	61596969	1357	+	76	0.586996	0.618276	0.848431	0.0217391	0.0471014	0.250932	0.0465816	Oocyte-methylated, gDMR
CGI1623	Tspan15	10	61693282	61694503	1021	+	76	0.759577	0.628795	0.019854	0.0142179	0.0549298	0.016467	0.0554259
CGI1624	Hk1	10	61790329	61790800	271	+	12	0.605013	0.546125	0.0909863	0.025641	0.9592	0.0487061	0.471656	Sperm-methylated, gDMR
CGI1625	Hk1	10	61802172	61803594	1222	+	73	0.588373	0.638298	0.05	0.25	0.037037	0.0137056	0
CGI1626	Hkdc1	10	61864294	61864779	285	+	16	0.620735	0.607018	0.00322919	0	0.973545	0.0996391	0.234568	Sperm-methylated, gDMR
CGI1627	Hkdc1	10	61867800	61868457	457	+	22	0.572113	0.584245	0.0332856	0.0069697	0.0733169	0.031311	0.363393
CGI1628	Supv3l1	10	61911861	61913234	1173	+	82	0.866765	0.568627	0.0276315	0.016129	0.0428458	0.0199658	0.0104555
CGI1629	Vps26a	10	61948793	61950145	1152	+	97	0.804011	0.651042	0.0185185	0	0.0305672	0.0283286	0.0171569
CGI1630	2510003E04Rik	10	62040453	62041484	831	+	78	0.890231	0.651023	0.041649	0.0130662	0.00940733	0.0242124	0
CGI1631	Ddx21	10	62064566	62065731	965	+	70	0.812722	0.597927	0.0581444	0.0645161	0.0109407	0.0241684	0.0351035
CGI1632	Ddx50	10	62113219	62114761	1342	+	119	0.854399	0.646051	0.0472951	0.0390572	0.0127964	0.0173144	0.0225806
CGI1633	Stox1	10	62127726	62128156	230	+	14	0.789759	0.556522	0.01	0	0.193452	0.0122507	0.0512821
CGI1634	Stox1	10	62188184	62189426	1042	+	91	0.799874	0.661228	0	0.111111	0.0251894	0.020229	0.0681908
CGI1635	Ccar1	10	62254239	62255473	1034	+	109	0.927085	0.676015	0.0440821	0.0212766	0.15641	0.0123592	0.0308989
CGI1636	Tet1	10	62275428	62275851	223	+	14	0.781671	0.569507	0.00125648	0.00420168	0.113348	0.0314464	0.791056
CGI1637	Tet1	10	62328164	62328746	382	+	18	0.575511	0.575916	0	0.0131579	0.0169705	0.0182129	0.083768
CGI1638		10	62348736	62350406	1470	+	88	0.679646	0.598639	0.0184321	0.0102592	0.0589933	0.0457841	0.0215408
CGI1639	Slc25a16	10	62382640	62384074	1234	+	88	0.785919	0.602917	0.0253552	0.00229227	0.0775253	0.0243737	0.0217391
CGI1640	Dna2	10	62409379	62410332	753	+	69	0.926391	0.634794	0.05	0	0.0692029	0.0118016	0.0384615
CGI1641	Rufy2	10	62442623	62443762	939	+	80	0.764928	0.669862	0	0.0153509	0.0471483	0.0188171	0.0163374
CGI1642	Rufy2	10	62453471	62453838	167	+	6	0.528321	0.532934	0.974359	0.05	0.0265625	0.253423	0.200483	Oocyte-methylated, gDMR
CGI1643	Hnrnph3, 3110049J23Rik	10	62485406	62487292	1686	+	146	0.84889	0.643535	0.0238623	0.00290468	0.105177	0.0203401	0.0176471
CGI1644	Atoh7	10	62562346	62563741	1195	+	82	0.761329	0.600837	0.0288205	0.0181379	0.045342	0.0171291	0.146006
CGI1645	Mypn	10	62593544	62594014	270	+	15	0.829773	0.518519	0.0219298	0.064529	0.138576	0.0286233	0.521333
CGI1646	Mypn	10	62655096	62656052	756	+	33	0.549928	0.564815	0.0666353	0.0714286	0.0728963	0.0282195	0.166667
CGI1647	Herc4	10	62706285	62707426	941	+	78	0.740567	0.669501	0.0308213	0.0227273	0.0252382	0.019008	0.0420054
CGI1648	Sirt1	10	62800804	62802723	1719	+	202	0.99748	0.691681	0.0497653	0.0231034	0.0472531	0.0213635	0.0313825
CGI1649		10	62844139	62844703	364	+	17	0.633685	0.543956	0.0132283	0	0.0416563	0.0253571	0.0171875
CGI1650		10	62844980	62845717	537	+	26	0.734744	0.523277	0.00622294	0	0.0758137	0.00745885	0.0384615
CGI1651	Dnajc12	10	62849139	62849739	400	+	22	0.713759	0.5575	0.00520833		0.0260247	0.0168386	0.025
CGI1652		10	62875546	62875908	162	+	7	0.545954	0.574074	0.170826	0.0555556	0.130609	0.0104072	0.534187
CGI1653		10	62884306	62884659	153	+	16	1.08647	0.627451	0.0438889		0.0108902	0.0348723	0.324074
CGI1654	Ctnna3	10	62892107	62893147	840	+	87	1.042	0.632143	0.00674656	0.0205174	0.0168429	0.0220025	0.0192623
CGI1655	Ctnna3	10	63046251	63046747	296	+	19	0.922069	0.533784	0.952381	0	0.0606293	0.296428	0.260149	Oocyte-methylated, gDMR
CGI1656	Ctnna3	10	63047728	63048240	312	+	14	0.736231	0.50641	0.928571	0	0.0474486	0.396122	0.91917	Oocyte-methylated, gDMR
CGI1657	Ctnna3	10	63349437	63349857	220	+	11	0.687126	0.540909	0.0222663	0.0769231	0.0735969	0.0488871	0.520833
CGI1658	Ctnna3, Lrrtm3	10	63550494	63551178	484	+	23	0.562477	0.582645	0	0	0.0307618	0.0131705	0.135721
CGI1659		10	66235523	66235940	217	+	11	0.822659	0.497696	0.737716	0.0888889	0.167657	0.113288	0.790115
CGI1660		10	66376007	66376410	203	+	11	0.846813	0.507389	0		0.104635	0.0325786	0.160768
CGI1661		10	66465411	66465804	193	+	14	0.618414	0.689119	0.0166667		0.0368421	0.01085	0.0119048
CGI1662	Reep3	10	66558694	66560396	1502	+	173	0.948508	0.697736	0.0212295	0.0380039	0.0961271	0.0228439	0.00255153
CGI1663	Jmjd1c	10	66589102	66590533	1231	+	156	1.09689	0.683997	0.702102	0.0188679	0.0284408	0.077319	0.0162037
CGI1664	Jmjd1c	10	66648360	66648761	201	+	8	0.662855	0.492537	0	0	0.746742	0.0904748	0.0434783
CGI1665	Jmjd1c	10	66667919	66668290	171	+	10	0.69638	0.602339	1	0.333333	0.980769	0.320609	0.548169	Oocyte and sperm-methylated
CGI1666	Nrbf2	10	66747249	66748651	1202	+	97	0.793304	0.638935	0.0215163	0	0.06132	0.0234216	0.040797
CGI1667		10	66921377	66921856	279	+	14	0.687728	0.541219	0.00900994	0	0.138294	0.0950808	0.197917
CGI1668		10	66997665	66999924	2059	+	138	0.682103	0.629917	0.0220691	0.0666667	0.0285751	0.0306757	0.059064
CGI1669	Egr2	10	67000114	67000777	463	+	37	0.865676	0.609071	0.00161188	0.0454545	0.017316	0.0197199	0.00833333
CGI1670	Egr2	10	67000818	67002067	1049	+	67	0.665305	0.627264	0.0274218	0.00638909	0.0344551	0.0228623	0.0606742
CGI1671	Ado	10	67010436	67012552	1916	+	181	0.876074	0.65762	0.0266067	0.00595238	0.115296	0.0162168	0.0278345
CGI1672		10	67298994	67299371	177	+	14	1.36179	0.514124	0.0714286		0.0564789	0.0446649	0.649427
CGI1673	Zfp365	10	67371860	67372652	592	+	31	0.65135	0.567568	0.0603785	0.0269175	0.0560788	0.0378263	0.564256
CGI1674	Zfp365	10	67374541	67375689	948	+	66	0.652601	0.657173	0	0.0217391	0.0809659	0.0577308	0.0357143
CGI1675		10	67383296	67384111	615	+	35	0.819369	0.530081	0.0311111	0	0.00666667	0.018759	0.315789
CGI1676	Rtkn2	10	67442138	67442991	653	+	52	0.746774	0.655436	0.047619	0.4	0.03125	0.0286899	0
CGI1677	Rtkn2	10	67478435	67478897	262	+	10	0.507436	0.549618	0.959789	0	0.154045	0.242392	0.547136	Oocyte-methylated, gDMR
CGI1678	Arid5b	10	67560095	67560703	408	+	23	0.817436	0.541667	1	0.0384615	0.0480296	0.221482	0.576735	Oocyte-methylated, gDMR
CGI1679	Arid5b	10	67599091	67599541	250	+	13	0.659202	0.564	1	0	0.230303	0.0808501	0.015873	Oocyte-methylated
CGI1680	Arid5b	10	67739134	67740248	914	+	55	0.680961	0.595186	0	0	0.0495859	0.0262564	0.00123457
CGI1681		10	67745748	67746171	223	+	13	0.634712	0.609865	0.0427015	0.00368687	0.0133333	0.0140643	0.0238095
CGI1682	1700040L02Rik	10	67910761	67911228	267	+	15	0.960128	0.494382	0	0	0.0260771	0.0253968	0.95
CGI1683	1700040L02Rik	10	68004406	68004882	276	+	14	0.654192	0.557971	0.0659341	0	0.064411	0.0463972	0.0885417
CGI1684	Tmem26	10	68186349	68187361	812	+	35	0.501304	0.594828	0.0238095	0	0.0232323	0.0307971	0.03125
CGI1685		10	68540646	68541102	256	+	10	0.521306	0.558594	0.0662393	0	0.105642	0.0413547	0.452498
CGI1686	Rhobtb1	10	68675190	68676727	1337	+	107	0.699497	0.678384	1	0	0.025	0.216545	0	Oocyte-methylated, gDMR
CGI1687	Rhobtb1	10	68728759	68729169	210	+	11	0.753589	0.528571	0.923077		0.140774	0.353116	0.835	Oocyte-methylated, gDMR
CGI1688	Rhobtb1	10	68732593	68733361	568	+	31	0.648113	0.580986	0.903896		0.170767	0.363352	0.388096	Oocyte-methylated, gDMR
CGI1689		10	68774647	68775163	316	+	17	0.762458	0.53481	0	0.0845679	0.0489648	0.0126287	0.270755
CGI1690	Cdk1	10	68814691	68815300	409	+	20	0.609035	0.572127	0.0555556	0	0.0975779	0.00882903	0.003367
CGI1691	Cdk1	10	68815288	68816079	591	+	36	0.714451	0.58714	0.0341969	0.0233399	0.00862069	0.00662417	0.018956
CGI1692		10	68861042	68862767	1525	+	109	0.712996	0.633443	0.035759	0	0.0198903	0.0113545	0.0175781
CGI1693	Ank3	10	69284804	69285324	320	+	19	0.762382	0.5625	0.648525	0	0.0678686	0.297565	0.61205
CGI1694	Ank3	10	69467512	69468012	300	+	15	0.69806	0.536667	1		0.00925926	0.339291	0.786843	Oocyte-methylated, gDMR
CGI1695		10	69522628	69523048	220	+	11	0.885628	0.481818	0.156464	0	0.179602	0.047491	0.245524
CGI1696	Ccdc6	10	69559127	69561124	1797	+	174	0.794977	0.701169	0.0262985	0.0623204	0.047646	0.00919755	0.040404
CGI1697	Slc16a9	10	69707233	69708776	1343	+	80	0.599512	0.630678	0.0168131	0.0401258	0.0339089	0.0795301	0.0274785
CGI1698	Fam13c	10	69902881	69903920	839	+	47	0.62506	0.599523	0.143786	0	0.0238095	0.0523242	0
CGI1699	Fam13c	10	69983070	69983848	578	+	30	0.619121	0.579585	0.327223	0	0.0480769	0.065045	0
CGI1700	Phyhipl	10	70061119	70063232	1913	+	202	0.905393	0.685311	0.0389685	0.0232558	0.0125104	0.0141831	0.0209114
CGI1701		10	70293401	70293880	279	+	15	0.691708	0.562724	0.0342857		0	0.0165271	0.481405
CGI1702	Bicc1	10	70621609	70623021	1212	+	132	0.890603	0.70132	0.0721545	0.0217391	0.0450461	0.0123665	0.016978
CGI1703		10	70680482	70680853	171	+	9	0.614307	0.590643	1	0.0647619	0.112698	0.269967	0.472222	Oocyte-methylated, gDMR
CGI1704	Tfam	10	70700136	70701334	998	+	75	0.721217	0.649299	0.0100067	0	0.0113636	0.0159758	0.0133333
CGI1705		10	70713285	70713708	223	+	13	0.770386	0.578475	0.640571	0.0323887	0.131807	0.0524176	0.714472
CGI1706	Ube2d1	10	70747238	70748695	1257	+	93	0.806011	0.614161	0.0421456	0.038961	0.0259597	0.0111824	0.064489
CGI1707		10	70762885	70763254	169	+	10	0.85216	0.544379	0.11293	0.00441968	0.116146	0.0025	0.59848
CGI1708	Cisd1	10	70807039	70808271	1032	+	77	0.785963	0.617248	0.0175957	0.0328627	0.0768398	0.0179511	0.0104478
CGI1709	Ipmk	10	70810022	70811557	1335	+	106	0.731522	0.659176	0.00483092		0.0418626	0.0216075	0.0139194
CGI1710	Ipmk	10	70844068	70844679	411	+	28	0.949158	0.537713	0.0781136	0	0.0439557	0.0248284	0.128696
CGI1711	Zwint	10	72117297	72118044	547	+	37	0.837335	0.570384	0.117406	0.037037	0.0233371	0.0232742	0.0181818
CGI1712		10	72561509	72563224	1515	+	123	0.787184	0.642904	0.0186886	0.0025	0.0940171	0.0566735	0.0173611
CGI1713		10	74108166	74108853	487	+	22	0.588276	0.556468	0.997647	0.0416667	0.0137995	0.265267	0.685185	Oocyte-methylated, gDMR
CGI1714		10	74388027	74388702	475	+	24	0.642523	0.562105	0.0317631	0.112716	0.258824	0.060047	0.181076
CGI1715	Rtdr1, Gnaz	10	74429217	74431031	1614	+	124	0.759969	0.644362	0.0431338	0.0281794	0.0903139	0.0274601	0.0821594
CGI1716	Rab36	10	74499522	74500291	569	+	36	0.640451	0.629174	0.00934959	0	0.0283883	0.0137924	0.037037
CGI1717	Bcr	10	74522667	74525225	2358	+	225	0.859232	0.666667	0.042075	0.0566038	0.0161007	0.0349518	0.0356035
CGI1718		10	74674387	74675549	962	+	81	0.749994	0.671518	0.00849713		0.0219907	0.0961166	0.0234568
CGI1719	Adora2a	10	74779310	74780782	1272	+	97	0.708977	0.665094	0.0119601	0.107143	0.0488372	0.0230875	0.0880401
CGI1720	Adora2a	10	74788764	74789163	199	+	12	0.734862	0.58794	0.0427298	0.05	0.726993	0.0659139	0.54252
CGI1721	Adora2a	10	74795957	74796530	373	+	17	0.497344	0.616622	0.0214061	0	0.0960317	0.0298013	0.50603
CGI1722		10	74906892	74907305	213	+	14	0.861681	0.553991	1	0.0094508	0.0148237	0.311397	0.490367	Oocyte-methylated, gDMR
CGI1723	Snrpd3, 1110038D17Rik	10	74979541	74981332	1591	+	96	0.651836	0.612822	0.111199	0.0301587	0.0222215	0.0176961	0.0294831
CGI1724	AI646023	10	75021944	75023600	1456	+	88	0.619479	0.625687	0.0243902	0.0527122	0.00956478	0.0229489	0.134601
CGI1725	Ggt5	10	75052301	75052887	386	+	16	0.472855	0.601036	0.986111	0.00141745	0.969951	0.346772	0.74375	Oocyte and sperm-methylated
CGI1726	Ggt5	10	75066460	75066842	182	+	9	0.693203	0.576923	1	0.0526316	0.317043	0.477658	0.699	Oocyte-methylated
CGI1727	Cabin1	10	75129715	75131180	1265	+	89	0.659252	0.654545	0.568342	0.0516102	0.0606061	0.117764	0.0619784
CGI1728	Cabin1	10	75226441	75227562	921	+	68	0.876549	0.58089	0.00491155	0.166667	0.0701923	0.0242746	0.00446131
CGI1729	Ddt	10	75235351	75236224	673	+	38	0.655979	0.592868	0.0869565	0.0147059	0.105655	0.0324957	0.0116959
CGI1730	Gstt3	10	75243441	75244083	442	+	20	0.524294	0.588235	0.0321259	0	0.0159674	0.0328803	0.0295139
CGI1731	Gstt2	10	75296778	75297528	550	+	28	0.656764	0.56	0.0772727	0	0	0.0125895	0.0714286
CGI1732		10	75299775	75300496	521	+	27	0.634839	0.571977	0.336832		0.0093254	0.0593862	0.0118786
CGI1733	Mif	10	75322177	75323316	939	+	60	0.652627	0.626198	0	0.00130136	0.0217391	0.0292651	0
CGI1734	Derl3	10	75355712	75356922	1010	+	67	0.676255	0.627723	0.0298726	0	0.0129167	0.0274962	0.145201
CGI1735	Smarcb1	10	75383519	75384968	1249	+	99	0.833738	0.617294	0.0323843	0.0121508	0.0603757	0.017433	0.0169913
CGI1736	Mmp11	10	75394738	75395722	784	+	47	0.585664	0.640306	0.1	0	0.0461538	0.00693297	0.117284
CGI1737	Chchd10	10	75398292	75399285	793	+	50	0.610686	0.643127	0.0578947	0	0.0576923	0.0105292	0.0373684
CGI1738		10	75413226	75414174	748	+	35	0.504407	0.610963	0.0311325	0.0562212	0.039627	0.0414794	0.134146
CGI1739		10	75417039	75417586	347	+	19	0.613363	0.599424	0	0.0454545	0	0.00570248	0
CGI1740	Zfp280b	10	75495028	75495903	675	+	57	0.720468	0.685926	0.0122354	0.1	0	0.0145702	0
CGI1741		10	75666309	75666811	302	+	12	0.466338	0.602649	0	0	0.0491801	0.019102	0.250295
CGI1742	Prmt2	10	75700090	75701100	810	+	47	0.682795	0.590123	0.0174381	0	0.0235961	0.0234796	0.041477
CGI1743	Dip2a	10	75807127	75808546	1219	+	111	0.809929	0.671042	0.0644702	0	0.0513045	0.0149947	0.0264228
CGI1744	Pcnt	10	75817466	75817928	262	+	14	0.590357	0.603053	0.998984	0.00224977	0.946581	0.30609	0.78	Oocyte and sperm-methylated
CGI1745	Pcnt	10	75904870	75906209	1139	+	85	0.837251	0.603161	0.0509893	0.00269616	0.0548678	0.0231123	0.0140356
CGI1746	Mcm3ap, A130042E20Rik	10	75931208	75931994	586	+	48	0.869901	0.619454	0.0261641	0.0454545	0.0685847	0.0144478	0.02
CGI1747	Lss	10	75993725	75994865	940	+	65	0.66346	0.646809	0.0397332	0	0.0309697	0.0197552	0.0144539
CGI1748	1700027D21Rik	10	76032245	76032999	554	+	27	0.577347	0.584838	0.0208333	0.105263	0.0961538	0.0236442	0.434589
CGI1749	Col6a2	10	76058827	76059650	623	+	42	0.707294	0.617978	0.0443513	0.0310078	0.0638889	0.0345041	0.529444
CGI1750	Col6a2	10	76085911	76086435	324	+	25	0.68112	0.709877	0.035468	0	0.00526316	0.0456195	0.0311653
CGI1751	Col6a1	10	76185987	76186471	284	+	16	0.645169	0.59507	0.00820707	0	0.113095	0.012913	0.705709
CGI1752	Pcbp3	10	76423905	76425379	1274	+	90	0.649903	0.660911	0.11718	0.0333333	0.0272109	0.0294323	0.0283333
CGI1753	Slc19a1	10	76495111	76496671	1360	+	81	0.675215	0.602206	0.0350649	0.0272679	0.0397085	0.0415507	0.00885354
CGI1754	Col18a1	10	76628083	76629553	1270	+	78	0.624334	0.627559	0.0652174	0	0.0429913	0.0166911	0.0437037
CGI1755	Pofut2	10	76721369	76722794	1225	+	103	0.826254	0.638367	0.0238824	0.000754717	0.0140833	0.017641	0.00824176
CGI1756	Adarb1	10	76879424	76881634	2010	+	166	0.759472	0.664179	0.195789	0.0163146	0.0492372	0.0970025	0.0388605
CGI1757	1810008A18Rik	10	76977815	76979094	1079	+	80	0.810644	0.60519	0.0440047	0.00846494	0.0511183	0.0147939	0.025
CGI1758		10	76985051	76985521	270	+	11	0.451673	0.603704	0	0.0480769	0.0977778	0.0172251	0.0822981
CGI1759	Pttg1ip	10	77043967	77045102	935	+	68	0.770558	0.614973	0.027381	0	0.0406762	0.0221596	0.0447727
CGI1760	Sumo3	10	77068175	77069917	1542	+	125	0.805432	0.636187	0.0290868	0	0.0531885	0.0206781	0.0575316
CGI1761	Ube2g2	10	77084540	77085757	1017	+	101	0.975967	0.640118	0.0221069	0.037037	0.0757345	0.0320934	0.0344203
CGI1762		10	77126509	77127540	831	+	48	0.650382	0.596871	0.0331737	0.00207194	0.0394737	0.0291939	0.215686
CGI1763		10	77140048	77140978	730	+	43	0.622671	0.616438	0.0127814	0.0357143	0.128333	0.00859601	0.0754986
CGI1764		10	77327314	77327760	246	+	13	0.54195	0.626016	0		0.0357143	0.0208274	0.395739
CGI1765	Lrrc3	10	77364562	77366268	1506	+	87	0.58988	0.636786	0.0164093	0.0909091	0.0549594	0.0158051	0.062046
CGI1766		10	77432299	77432981	482	+	27	0.626221	0.609959	0.0322581	0	0.0216049	0.0208463	0.165094
CGI1767	1810043G02Rik	10	77440678	77441809	931	+	66	0.714991	0.630505	0.0105068	0	0.0602837	0.0148725	0.0201149
CGI1768	Pfkl	10	77471642	77472858	1016	+	67	0.657738	0.636811	0.027652	0	0.0959558	0.0178081	0.0290675
CGI1769		10	77481452	77481980	328	+	19	0.75314	0.557927	0.0175439	0.0175439	0.0364662	0.0177784	0.313951
CGI1770	Aire	10	77497023	77497654	431	+	30	0.649628	0.656613	0.625	0.00882353	0.0502415	0.239823	0.522695
CGI1771	Dnmt3l, Aire	10	77505954	77506648	494	+	30	0.661443	0.607287	0.127445	0	0.0534012	0.0259299	0.0638272
CGI1772	Icosl	10	77531740	77532972	1032	+	70	0.670904	0.636628	0.0163934	0.0147059	0.0545455	0.0140197	0.0383772
CGI1773	D10Jhu81e	10	77627468	77627880	212	+	10	0.498257	0.622642	1	0	0.974074	0.456264	0.874328	Oocyte and sperm-methylated
CGI1774	D10Jhu81e	10	77631934	77633088	954	+	59	0.666167	0.610063	0.0604479	0.0328459	0.0513843	0.0344963	0.00347222
CGI1775	Pwp2	10	77647508	77648285	577	+	43	0.874651	0.589255	0.0475916	0.0224868	0.0578397	0.0119731	0.0230769
CGI1776	Trappc10	10	77706528	77708184	1456	+	114	0.78559	0.631868	0.133979	0.030303	0.0289566	0.0165341	0.00654191
CGI1777	Agpat3	10	77814284	77815918	1434	+	133	0.790536	0.690377	0.0277864		0.0104317	0.0136028	0.0621382
CGI1778		10	77835739	77836149	210	+	10	0.76451	0.504762	0.0110294	0.111111	0.709033	0.0420162	0.344536
CGI1779		10	77854680	77855163	283	+	15	0.700206	0.551237	0.0833333	0.0555556	0.0776786	0.0259907	0.0588235
CGI1780	Rrp1	10	77874964	77876244	1080	+	75	0.789513	0.593519	0.0337775	0.0141862	0.0684588	0.0233036	0.0131579
CGI1781	Cstb	10	77888110	77888884	574	+	36	0.592565	0.651568	0.0408403	1	0.03875	0.0159758	0
CGI1782	Pdxk	10	77927025	77928239	1014	+	68	0.678857	0.631164	0.032767	0	0.0463103	0.0146462	0.0460784
CGI1783		10	77944334	77945331	797	+	43	0.587841	0.609787	0.0548942	0.166667	0.120614	0.0224559	0.0178571
CGI1784		10	77950213	77950830	417	+	22	0.536651	0.628297	0.129075	0.04	0.0727793	0.154005	0.142626
CGI1785	Ilvbl	10	78036829	78038037	1008	+	60	0.730842	0.582341	0.0190176	0.0163934	0.0755723	0.0132141	0
CGI1786	Syde1	10	78054135	78054979	644	+	46	0.678375	0.65528	0.0428571		0.0200397	0.012929	0.0431373
CGI1787	Ccdc105	10	78209600	78210187	387	+	21	0.671949	0.586563	0.0413043	0	0.0989011	0.0283194	0.0694129
CGI1788	Ccdc105	10	78214921	78216008	887	+	68	0.750756	0.640361	0.0282014	0.027027	0.131667	0.0131208	0.06
CGI1789	Slc1a6	10	78242563	78243651	888	+	64	0.667301	0.657658	0.0162451	0	0.0427111	0.0741404	0.147817
CGI1790	Slc1a6	10	78250376	78250880	304	+	18	0.614926	0.621711	0.00146871	0.04554	0.0306122	0.0875239	0.0712121
CGI1791	2610008E11Rik	10	78559970	78560577	407	+	28	0.708338	0.624079	0.0299601	0.0357143	0.0464901	0.0207801	0
CGI1792	Ppap2c	10	78995762	78996876	914	+	57	0.580016	0.657549	0.375	0.0200893	0.0553651	0.0355014	0.0229938
CGI1793	Mier2	10	79016918	79018581	1463	+	116	0.727563	0.661654	0.0226562		0.0897927	0.0140924	0.0582271
CGI1794	C2cd4c	10	79074837	79075927	890	+	50	0.520749	0.657303	0.0396825	0.0370879	0.0701754	0.0255674	0.252174
CGI1795	C2cd4c	10	79076101	79077246	945	+	61	0.596636	0.660317	0.0215278	0.015873	0.00653595	0.0184505	0.0313218
CGI1796	Shc2	10	79099601	79101269	1468	+	123	0.783824	0.655313	0.0209591	0.0492316	0.025731	0.0156851	0.062249
CGI1797		10	79101549	79101993	244	+	14	0.55395	0.647541	0.0335498	0	0.0119048	0.00730364	0.0568182
CGI1798	Gm16517	10	79131632	79133237	1405	+	96	0.763491	0.600712	0.0976322	0.0233333	0.0486905	0.0198719	0.00625896
CGI1799	Gm16517	10	79138023	79138717	494	+	39	0.718248	0.665992	1	0	0.358586	0.175165	0.148649	Oocyte-methylated
CGI1800	Cdc34	10	79143918	79145701	1583	+	139	0.807393	0.660139	0.0343618	0.0222222	0.0466667	0.0154709	0.01875
CGI1801	Bsg	10	79166661	79168137	1276	+	75	0.668465	0.608934	0.0795692	0.0230769	0.0838331	0.0399169	0.0458438
CGI1802	Bsg	10	79171416	79171878	262	+	15	0.574746	0.633588	1	0.00237127	0.984127	0.323874	0.542778	Oocyte and sperm-methylated
CGI1803	Hcn2	10	79178828	79181238	2210	+	198	0.79956	0.671946	0.0388958	0.000872725	0.0268703	0.0153246	0.0672729
CGI1804	Hcn2	10	79191541	79191904	163	+	13	0.870948	0.607362	0.128205	0.0559211	0.952632	0.366568	0.282874	Sperm-methylated, gDMR
CGI1805	Polrmt, Hcn2	10	79197351	79199661	2110	+	154	0.691872	0.650711	1	0	0.21919	0.23449	0.495886	Oocyte-methylated
CGI1806	Polrmt	10	79200636	79201039	203	+	11	0.5644	0.625616	0.965646	0	0.735417	0.372458	0.981771	Oocyte-methylated
CGI1807	Polrmt	10	79208938	79209610	472	+	33	0.819804	0.584746	0.00694444	0.00081983	0.0482577	0.0165688	0.0604658
CGI1808	Fgf22	10	79217606	79218352	546	+	35	0.616747	0.64652	0.25	0	0	0.040263	0.0291423
CGI1809	Rnf126	10	79228680	79230721	1841	+	151	0.799146	0.644215	0.0419783	0.0208333	0.0412817	0.0245088	0.00805409
CGI1810	Fstl3	10	79239464	79240444	780	+	43	0.561777	0.626923	0.0744417		0.047619	0.100108	0.291667
CGI1811	Fstl3, Prssl1	10	79242436	79244250	1614	+	88	0.587331	0.620818	0.0228649	0	0.0809879	0.0578758	0.0704012
CGI1812	Prssl1	10	79246985	79247526	341	+	18	0.61499	0.589443	0.0125	0	0.203095	0.0738807	0.162872
CGI1813	Palm	10	79255698	79257028	1130	+	80	0.675931	0.648673	0	0	0.0680272	0.0378642	0.0803571
CGI1814	Palm	10	79266374	79266973	399	+	24	0.588852	0.641604	0.0311576	0	0.1676	0.00931034	0.171886
CGI1815	Ptbp1	10	79316549	79318628	1879	+	160	0.903928	0.615753	0.0478926	0.0181818	0.0631556	0.0121584	0.0218579
CGI1816	BC005764	10	79328543	79329022	279	+	12	0.449204	0.620072	0.751077	0.000438596	1	0.379449	0.671028	Sperm-methylated
CGI1817	BC005764	10	79336539	79337837	1098	+	80	0.695989	0.647541	0.00555556	0.064065	0.0420402	0.0194447	0.032788
CGI1818	Prtn3	10	79344541	79345184	443	+	26	0.584095	0.641084	0	0	0.145652	0.0234373	0.176768
CGI1819	Med16	10	79371068	79371848	580	+	42	0.860349	0.627586	0	0.0666667	0.104312	0.0376861	0.0202907
CGI1820	C030046I01Rik, Kiss1r	10	79379299	79380103	604	+	41	0.599895	0.678808	0	0	0.0208333	0.0148611	0.0336124
CGI1821	Kiss1r	10	79381066	79381794	528	+	28	0.546066	0.625	0	0	0.559524	0.0413914	0.305944
CGI1822	Kiss1r	10	79383024	79384896	1672	+	104	0.625308	0.630981	0.113542	0.0149254	0.102381	0.0706943	0.108447
CGI1823		10	79387999	79388440	241	+	16	0.803667	0.576763	0.00544118		0.0385714	0.0110232	0
CGI1824	Arid3a	10	79388920	79391153	2033	+	144	0.743889	0.617314	0.02732	0.0347329	0.0708673	0.0132694	0.0147186
CGI1825	Arid3a	10	79399595	79400431	636	+	31	0.44782	0.660377	0.947368	0.0769231	0.864583	0.26147	0.590909	Oocyte and sperm-methylated
CGI1826		10	79420897	79421395	298	+	14	0.539996	0.610738	0	0.0277778	0.901997	0.048957	0.0722539	Sperm-methylated, gDMR
CGI1827	Wdr18	10	79422475	79423645	970	+	69	0.794741	0.602062	0.0505152	0	0.0345052	0.00879889	0.0163934
CGI1828	Grin3b	10	79433292	79434568	1076	+	63	0.590276	0.6329	1	0.0647931	0.0122605	0.236278	0.047619	Oocyte-methylated, gDMR
CGI1829	ORF61, Grin3b	10	79438223	79440608	2185	+	145	0.626603	0.651716	0.886119	0.0133333	0.118931	0.263854	0.362485	Oocyte-methylated, gDMR
CGI1830	ORF61	10	79446259	79448099	1640	+	119	0.813212	0.60122	0.0295131	0	0.042209	0.0205933	0.0252079
CGI1831		10	79448345	79448741	196	+	9	0.716382	0.510204	0.03125	0	0.0030506	0.0163404	0.0251634
CGI1832	Cnn2	10	79451005	79452174	969	+	75	0.738047	0.648091	0.0661951	0	0.0763889	0.0178298	0.0031746
CGI1833	Cnn2	10	79453539	79454179	440	+	19	0.461376	0.613636	0.0105101	0.001969	0.00625	0.0305379	0.137037
CGI1834		10	79459029	79459608	379	+	21	0.604916	0.614776	0.00446429	0	0	0.017407	0.0308642
CGI1835	Abca7	10	79459868	79460736	668	+	31	0.555307	0.580838	0.365004	0.0532213	0.0136364	0.0447623	0.0617284
CGI1836	Abca7	10	79465268	79465855	387	+	21	0.632613	0.586563	1	0.000236128	0.715632	0.319245	0.175485	Oocyte-methylated
CGI1837	Abca7	10	79476436	79477541	905	+	43	0.522969	0.60884	0.944444	0	0.43569	0.16874	0.0790043	Oocyte-methylated
CGI1838	Hmha1	10	79488737	79489265	328	+	15	0.541123	0.582317	0	0	0.328571	0.0450179	0.402174
CGI1839	Polr2e	10	79501930	79502916	786	+	59	0.837537	0.600509	0.029661	0.0101852	0.094665	0.0181279	0.0143678
CGI1840	Gpx4	10	79515895	79517716	1621	+	126	0.789273	0.628007	0.0909593	0.0133333	0.0233918	0.0216627	0.0222089
CGI1841	Sbno2	10	79537730	79538313	383	+	20	0.508748	0.644909	1	0	0.948718	0.209422	0.104798	Oocyte and sperm-methylated
CGI1842	Sbno2	10	79564830	79565802	772	+	63	0.742568	0.664508	0.0167832		0.0147059	0.012257	0.0564327
CGI1843	Stk11	10	79577397	79580318	2721	+	221	0.89281	0.603455	0.112088	0.0147851	0.111496	0.0267392	0.0328368
CGI1844	Dos	10	79593868	79595075	1007	+	80	0.753758	0.650447	0.924509	0.0555414	0.0192308	0.280927	0.198276	Oocyte-methylated, gDMR
CGI1845	Dos	10	79599013	79599571	358	+	32	0.750856	0.703911	0.999321	0.0542857	0.075188	0.182192	0.317249	Oocyte-methylated, gDMR
CGI1846	Dos	10	79599618	79600350	532	+	26	0.477041	0.640977	1	0	0	0.30134	0.0235294	Oocyte-methylated, gDMR
CGI1847	Dos	10	79600919	79602653	1534	+	114	0.727398	0.639505	0.37774	0	0.0436745	0.0671236	0.0466977
CGI1848		10	79603884	79604540	456	+	30	0.725938	0.60307	0.0127946	0	0.0811111	0.031255	0
CGI1849	Atp5d	10	79604807	79605543	536	+	43	0.877321	0.61194	0.0415282	0.0190476	0.0767984	0.0219646	0.0113971
CGI1850	Midn	10	79610583	79614335	3552	+	268	0.680519	0.666104	0.187189	0	0.0450955	0.0306141	0.0142025
CGI1851		10	79622260	79623245	785	+	53	0.69517	0.624204	0.0697531	0.0338116	0.0154762	0.0128471	0.00320513
CGI1852		10	79623764	79624267	303	+	17	0.473525	0.689769	0.00113636	0	0.0961538	0.0111111	0
CGI1853		10	79627134	79628172	838	+	53	0.638051	0.630072	0.0212298	0	0.0814035	0.0175602	0.0434055
CGI1854	Cirbp	10	79630096	79631394	1098	+	99	0.943471	0.621129	0.0252878	0.0357143	0.0538303	0.0129752	0.0258216
CGI1855	1600002K03Rik	10	79635474	79636291	617	+	35	0.694785	0.572123	0.178856	0	0.0652174	0.0307407	0.0596899
CGI1856	Efna2	10	79641490	79643473	1783	+	119	0.641397	0.645541	0.116667	0	0.335	0.0726668	0.133951
CGI1857	Efna2	10	79649288	79649887	399	+	27	0.665029	0.641604	1	0	0.5	0.22571	0.0906667	Oocyte-methylated
CGI1858		10	79652694	79654148	1254	+	90	0.688766	0.645933	0.224783	0	0.0166667	0.0526109	0.0840708
CGI1859		10	79671499	79671986	287	+	22	0.837219	0.606272	0.0113636	0.0157133	0.109554	0.0291359	0.0997024
CGI1860	Mum1	10	79688841	79689962	921	+	85	0.77026	0.697068	0.0646809	0.1	0.025641	0.0173093	0.0660052
CGI1861	Ndufs7	10	79711599	79712590	791	+	58	0.974254	0.549937	0.000241313	0	0.0429739	0.0267641	0.017165
CGI1862	Gamt	10	79723095	79724382	1087	+	56	0.550319	0.620975	0.106776	0.0428571	0.0773438	0.0767922	0.0388937
CGI1863	Dazap1	10	79727165	79728214	849	+	97	0.996328	0.681979	0.0288066	0.0185185	0	0.0191492	0.00805825
CGI1864	Rps15	10	79754765	79755873	908	+	70	0.843576	0.605727	0.0411144	0.0810769	0.0157695	0.0126668	0.0396782
CGI1865		10	79758538	79759152	414	+	19	0.46079	0.63285	0.0597222	0	0.00859649	0.127259	0.0154151
CGI1866		10	79761571	79762248	477	+	33	0.619101	0.67086	0.0671429	0	0.03125	0.0528219	0.091695
CGI1867	Apc2	10	79767321	79768041	520	+	31	0.658931	0.615385	0.0273568	0	0.0539063	0.0138964	0.116917
CGI1868	Apc2	10	79774481	79776198	1517	+	85	0.544045	0.642057	0.95	0.0390947	0.543182	0.295594	0.307065	Oocyte-methylated
CGI1869	Apc2	10	79777633	79778573	740	+	50	0.660464	0.645946	0.709998	0	0.128378	0.199955	0.3513
CGI1870	2310011J03Rik	10	79782763	79783666	703	+	53	0.855625	0.598862	0.0133773	0.08	0.0277629	0.0123447	0.0127202
CGI1871	Pcsk4	10	79785425	79786868	1243	+	76	0.571125	0.660499	0.000575043		0.177419	0.0237474	0.0751574
CGI1872	Reep6	10	79792257	79793559	1102	+	67	0.640701	0.61706	0.0375236	0	0.0381153	0.014112	0.0392235
CGI1873	Adamtsl5	10	79803836	79805993	1957	+	120	0.607151	0.641799	0.0146062	0.02	0.108645	0.0257505	0.121673
CGI1874	Adamtsl5	10	79810690	79812264	1374	+	82	0.573853	0.652111	0.014882	0.0679705	0.0717213	0.0179693	0.100467
CGI1875	Plk5	10	79818518	79820095	1377	+	101	0.712408	0.641975	0.0352155	0.013515	0.0361345	0.0270625	0.0694523
CGI1876	Plk5	10	79820450	79821290	640	+	34	0.558321	0.61875	0.0204216	0.142857	0.0168067	0.01216	0.142857
CGI1877	Mex3d	10	79848910	79851342	2232	+	204	0.780636	0.685932	0.18113	0	0.075647	0.0241284	0.0325149
CGI1878	Mbd3	10	79861266	79863078	1612	+	156	0.902543	0.66005	0.033614	0.0156464	0.0900562	0.0294609	0.0402174
CGI1879	Uqcr11	10	79868884	79869872	788	+	41	0.662673	0.560914	0.0270142	0.0614163	0.017381	0.0712433	0.0163354
CGI1880	Tcf3	10	79875227	79876183	756	+	43	0.578881	0.634921	0.712054	0	0.932554	0.416756	0.535038	Sperm-methylated
CGI1881	Tcf3	10	79895457	79897098	1441	+	123	0.876142	0.625954	0.0405405	0.0273973	0.0505916	0.0133511	0.0217508
CGI1882		10	79908922	79909569	447	+	24	0.740602	0.53915	0.900287	0	0.0301282	0.198142	0.0454545	Oocyte-methylated, gDMR
CGI1883		10	79934318	79935059	541	+	28	0.481688	0.656192	0	0	0.0344828	0.0451344	0.196759
CGI1884		10	79937513	79938807	1094	+	75	0.653529	0.648995	0	0.0484848	0.0121795	0.0126417	0.111413
CGI1885		10	79952785	79954563	1578	+	86	0.587098	0.609632	0.0845125	0	0.0957819	0.165978	0.0850815
CGI1886	Onecut3	10	79957159	79959641	2282	+	202	0.753355	0.685802	0.032967	0.00888585	0.0198413	0.0294578	0.0349643
CGI1887	Onecut3	10	79965533	79965952	219	+	14	0.556974	0.680365	0.0119048	0.047619	0.0708333	0.0172514	0
CGI1888	Onecut3	10	79966174	79966643	269	+	19	0.854442	0.576208	0.0047658	0.047619	0.0732832	0.0152602	0.0188293
CGI1889	Onecut3	10	79976535	79977045	310	+	20	0.642569	0.63871	0.000884173	0	0.961873	0.0872	0.444616	Sperm-methylated, gDMR
CGI1890	Atp8b3	10	79989286	79989733	247	+	13	0.512568	0.643725	0.00346847	0.0666667	0.220068	0.0772179	0.34697
CGI1891	Atp8b3	10	79997966	79998391	225	+	15	0.805433	0.577778	0	0	0.0424812	0.0212434	0.0840336
CGI1892	Atp8b3	10	79998882	79999401	319	+	8	0.310494	0.570533	0.1	0	0.0350694	0.0199951	0.091685
CGI1893	Atp8b3	10	80001578	80002213	435	+	27	0.620497	0.662069	0.00510204	0.05	0.0138889	0.0155952	0.0111656
CGI1894	Rexo1	10	80023377	80024791	1214	+	92	0.831301	0.604613	0.01533	0.0258065	0.0659471	0.0188128	0.0209707
CGI1895	Klf16	10	80033782	80034304	322	+	14	0.471046	0.608696	0.877778	0	0.848695	0.276586	0.0388889	Oocyte and sperm-methylated
CGI1896	Klf16	10	80038553	80041537	2784	+	242	0.802961	0.659124	0.043463	0	0.0425559	0.0217948	0.0211593
CGI1897	Fam108a	10	80046537	80047115	378	+	20	0.599308	0.597884	0.996047	0.0357143	0.539216	0.150935	0.277143	Oocyte-methylated
CGI1898	Fam108a	10	80049152	80050094	742	+	51	0.611179	0.671159	1		0.5	0.291944	0.699943	Oocyte-methylated
CGI1899	Fam108a	10	80052375	80053547	972	+	74	0.72028	0.659465	0.173599	0	0.0463448	0.0120567	0.017743
CGI1900	Scamp4, Adat3	10	80065273	80066373	900	+	57	0.762653	0.576667	0.00296111	0.041843	0.00595238	0.0136887	0.031746
CGI1901	Csnk1g2	10	80084517	80086525	1808	+	158	0.885145	0.635509	0.084417	0.00787402	0.0511441	0.0175604	0.00798589
CGI1902	Btbd2	10	80118286	80119920	1434	+	89	0.690785	0.652022	0.0546559	0	0.0340796	0.0346798	0
CGI1903		10	80138091	80139993	1702	+	141	0.772656	0.655112	0.0680242	0	0.0896037	0.0215113	0.0358115
CGI1904	Mobkl2a, Izumo4	10	80164222	80166027	1605	+	104	0.669049	0.626168	0.0236662		0.0672222	0.0143641	0.0251587
CGI1905	Ap3d1	10	80204284	80205406	922	+	64	0.678825	0.639913	0.0172414	0.0302564	0.0166667	0.0141103	0.00537634
CGI1906	Dot1l	10	80217499	80219201	1502	+	135	0.880527	0.641145	0.0907496	0.0113839	0.0380526	0.0315922	0.0136986
CGI1907	Dot1l	10	80254417	80255564	947	+	55	0.530526	0.669483	0.998492	0.0176317	0.443329	0.32456	0.294641	Oocyte-methylated
CGI1908	Sf3a2, Plekhj1	10	80260127	80262382	2055	+	181	0.914384	0.620925	0.0958816	0.0185185	0.0275298	0.0360759	0.0188299
CGI1909	Amh	10	80269023	80270709	1486	+	98	0.617441	0.656124	0.591074	0.0240363	0.0857013	0.0970039	0.148876
CGI1910	Jsrp1	10	80270812	80272024	1012	+	48	0.541784	0.593874	0.0487805	0.00419774	0.0271827	0.0338228	0.185912
CGI1911	Jsrp1	10	80272804	80273425	421	+	23	0.518486	0.650831	0.0333333	0.0588235	0.0439173	0.054026	0.239565
CGI1912	Oaz1	10	80288841	80290535	1494	+	109	0.901619	0.578983	0.0960784	0.00694444	0.205322	0.0160658	0.0315534
CGI1913	Lingo3	10	80296942	80299008	1866	+	147	0.735099	0.656484	0.0430197	0.038986	0.12011	0.0187049	0.278998
CGI1914	Lingo3	10	80305961	80307322	1161	+	79	0.61772	0.668389	0.0459959	0	0.0602151	0.0135174	0.0976776
CGI1915	Lsm7, 3110056O03Rik	10	80317389	80318909	1320	+	94	0.714104	0.640909	0.0316602	0.0290069	0.0393717	0.0167758	0.062054
CGI1916	3110056O03Rik	10	80326836	80327533	497	+	21	0.449325	0.619718	0.985567	0.0350877	0.971014	0.447744	0.762962	Oocyte and sperm-methylated
CGI1917	Tmprss9	10	80350819	80351427	408	+	37	0.877993	0.644608	0.0294689	0	0.141026	0.0166991	0.130506
CGI1918	Tmprss9	10	80352799	80353275	276	+	16	0.529391	0.663043	0	0.0583333	0.329201	0.0400621	0.288375
CGI1919	Tmprss9	10	80359844	80360197	153	+	10	0.538485	0.712418	1	0.0495356	0.166667	0.165805	0.222222	Oocyte-methylated, gDMR
CGI1920	Tmprss9	10	80360374	80361111	537	+	37	0.650334	0.651769	0.670477	0.065478	0.136161	0.222784	0.0806452
CGI1921	Timm13	10	80362634	80364015	1181	+	90	0.802832	0.622354	0.193719	0.001618	0.0616597	0.0315518	0.0512821
CGI1922	Lmnb2	10	80380173	80381425	1052	+	73	0.757913	0.605513	0.045509	0.0434783	0.0286311	0.0163903	0.0309746
CGI1923	Gadd45b	10	80391255	80394089	2634	+	162	0.706739	0.590357	0.0196047	0.0467933	0.0923931	0.013929	0.0354314
CGI1924	Gadd45b	10	80394460	80395332	672	+	44	0.727569	0.602679	0.0350536	0.142857	0.112304	0.0184423	0.0443376
CGI1925		10	80396189	80396803	414	+	18	0.566384	0.555556	0.0180404	0.0574163	0.0212662	0.0100437	0.162344
CGI1926		10	80398439	80399004	365	+	19	0.607872	0.586301	0		0.125	0.0156626	0
CGI1927		10	80398960	80399841	681	+	37	0.509439	0.654919	0.0591398		0.00769231	0.00623932	0
CGI1928		10	80402292	80402945	453	+	30	0.748808	0.596026	0.0442708	0	0.117521	0.0131787	0.00406504
CGI1929	Gng7	10	80415411	80415856	245	+	14	0.584135	0.632653	0	0.0010582	0.235294	0.0189608	0.258179
CGI1930	Gng7	10	80448000	80448893	693	+	39	0.551805	0.63925	0.0180556	0.0339729	0.122727	0.0243811	0.122421
CGI1931	Gng7	10	80460601	80461123	322	+	14	0.559382	0.559006	0	0.0641975	0.128356	0.0225153	0.192892
CGI1932	Gng7	10	80462110	80462956	646	+	32	0.537488	0.609907	0.034749	0.0466667	0.0323718	0.0224939	0.157895
CGI1933	Gng7	10	80477441	80477960	319	+	21	0.600006	0.664577	0.0555556	0	0.0727273	0.0148363	0.0122212
CGI1934	Diras1	10	80484338	80485472	934	+	53	0.617262	0.607066	0.348993	0.00235849	0.0749328	0.161267	0.101517
CGI1935	Diras1	10	80487413	80488566	953	+	48	0.457089	0.668416	0.0400508	0	0.137035	0.0432252	0.255233
CGI1936		10	80499630	80500383	553	+	33	0.66548	0.611212	0	0.0555556	0.0444444	0.0308543	0.0108696
CGI1937	Sgta	10	80522423	80523291	668	+	45	0.73427	0.606287	0.0104892	0.0259487	0.161765	0.0270544	0.0277778
CGI1938	Thop1	10	80532254	80533385	931	+	53	0.718008	0.56391	0.0184524	0.05	0.0549351	0.0228764	0.116799
CGI1939	Thop1	10	80542674	80543483	609	+	29	0.47048	0.63711	1	0	0.991736	0.573973	0.866667	Oocyte and sperm-methylated
CGI1940	Map2k2	10	80568041	80569685	1444	+	92	0.667169	0.629501	0.0272727	0	0.0417351	0.0125344	0.0248799
CGI1941		10	80591640	80592538	698	+	38	0.539134	0.636103	1	0	0.0611111	0.170831	0.0670635	Oocyte-methylated, gDMR
CGI1942		10	80596858	80597331	273	+	15	0.530809	0.644689	0	0.0588235	0	0.0155857	0
CGI1943	Zbtb7a	10	80597796	80601616	3620	+	284	0.717288	0.661878	0.0837379	0	0.0336478	0.0162362	0.0143564
CGI1944	Zbtb7a	10	80610482	80611507	825	+	59	0.718103	0.632727	0.914286	0	0.198701	0.469738	0.207426	Oocyte-methylated, gDMR
CGI1945	Pias4	10	80615993	80617470	1277	+	90	0.663055	0.65231	0.976818	0.0338175	0.157174	0.259363	0.393788	Oocyte-methylated, gDMR
CGI1946	Pias4	10	80629656	80630888	1032	+	66	0.656821	0.625969	0.0564856	0	0.0529167	0.0211433	0.0147421
CGI1947		10	80631524	80632028	304	+	16	0.642789	0.582237	0.00382206	0.00102854	0.0279982	0.0314231	0
CGI1948		10	80635806	80636321	315	+	21	0.921676	0.546032	0.012987	0	0.110996	0.0158313	0.00940171
CGI1949		10	80637350	80637970	420	+	21	0.668966	0.547619	0.0191018	0.00649351	0.00666667	0.023827	0.0176768
CGI1950	Eef2	10	80639010	80641021	1811	+	112	0.705152	0.59249	0.319823	0.0321074	0.338305	0.0432998	0.0936926
CGI1951	Eef2	10	80645192	80646200	808	+	51	0.77859	0.57302	0.16253	0.00617284	0.210519	0.0312566	0.00865801
CGI1952	Dapk3	10	80652518	80653531	813	+	51	0.681005	0.607626	0.942806	0.0211538	0.215476	0.199503	0.28537	Oocyte-methylated
CGI1953	Dapk3	10	80654503	80656278	1575	+	119	0.752473	0.63619	0.281034	0.0251572	0.155923	0.0450637	0.0672285
CGI1954		10	80657188	80657551	163	+	14	0.931853	0.613497	0.000992063	0	0.134259	0.0360078	0.186508
CGI1955	Atcay	10	80693020	80693577	357	+	17	0.548886	0.591036	0	0.00111164	0.0789474	0.0223245	0
CGI1956	Zfr2	10	80695469	80696473	804	+	54	0.657323	0.661692	0.0625	0	0.240909	0.00929952	0.0924731
CGI1957	Zfr2	10	80702274	80703078	604	+	35	0.546679	0.653974	1	0.0334528	0.1375	0.204004	0.289912	Oocyte-methylated, gDMR
CGI1958	Zfr2	10	80707207	80707616	209	+	13	0.672429	0.61244	1	0.0285714	0.976162	0.364896	0.0217493	Oocyte and sperm-methylated
CGI1959		10	80715612	80716211	399	+	21	0.541799	0.626566	1	0	0.0795455	0.303753	0.130642	Oocyte-methylated, gDMR
CGI1960	Matk	10	80719800	80721057	1057	+	65	0.576166	0.653737	0.251554	0.0558163	0.025641	0.137134	0.0737179
CGI1961	Mrpl54	10	80729080	80729914	634	+	44	0.902224	0.55836	0.00912698	0.0218254	0.0185185	0.00803558	0.0172414
CGI1962	Apba3	10	80730694	80731269	375	+	23	0.72484	0.586667	0.0533333	0.0726555	0.628755	0.0198003	0.0436706
CGI1963	Tjp3	10	80739758	80740255	297	+	23	0.671442	0.686869	0.00299145	0.029607	0.15	0.0284127	0.505556
CGI1964	Tjp3	10	80741778	80742194	216	+	18	0.767102	0.662037	0.015873	0.13125	0.142857	0.0225131	0.265625
CGI1965	Tjp3	10	80748091	80749178	887	+	65	0.744199	0.627959	0.0449531	0	0.0172157	0.0160564	0.0281583
CGI1966	Pip5k1c	10	80755183	80756714	1331	+	102	0.770362	0.631104	0.0404953	0.0171431	0.0338983	0.0153356	0.0144279
CGI1967	Pip5k1c	10	80765571	80766016	245	+	7	0.329323	0.595918	1		1	0.278935	0.699074	Oocyte and sperm-methylated
CGI1968	2510012J08Rik	10	80782342	80784610	2068	+	142	0.809421	0.587041	0.0461592	0.0119048	0.0722757	0.0149857	0.045886
CGI1969	Tbxa2r	10	80794903	80796118	1015	+	77	0.711913	0.653202	0.0175758	0	0.0185128	0.0286814	0.165243
CGI1970	Gipc3	10	80800387	80801242	655	+	46	0.662832	0.651908	0.0023129	0.0654762	0.151538	0.0142175	0.225067
CGI1971	Gipc3	10	80805514	80806552	838	+	73	0.745153	0.686158	0		0.0148795	0.0127571	0.140491
CGI1972	Hmg20b	10	80808805	80810303	1298	+	73	0.579227	0.627119	0.582753	0.0337287	0.0972999	0.0971577	0.173217
CGI1973	Hmg20b	10	80812458	80813850	1192	+	84	0.751108	0.620805	0.117647	0	0.0423882	0.021064	0.0171404
CGI1974	F630110N24Rik	10	80819737	80821300	1363	+	95	0.750015	0.611152	0.0755608	0.0462963	0.0844178	0.019423	0.0379502
CGI1975	4930404N11Rik, F630110N24Rik	10	80826476	80828289	1613	+	85	0.538422	0.626162	0.967618	0	0.175779	0.324288	0.163889	Oocyte-methylated, gDMR
CGI1976	Fzr1	10	80840433	80842011	1378	+	104	0.740801	0.638607	0.0325149	0	0.0227868	0.013685	0.00900638
CGI1977	Dohh	10	80846729	80847962	1033	+	63	0.754702	0.569216	0.0194425	0.0312372	0.0391732	0.0142709	0.033071
CGI1978	Nfic	10	80862805	80863547	542	+	29	0.503712	0.658672	0.944272	0.0151515	0.987963	0.425136	0.60461	Oocyte and sperm-methylated
CGI1979	Nfic	10	80870029	80870661	432	+	24	0.687305	0.569444	0.762626	0	0.978333	0.276601	0.153536	Sperm-methylated
CGI1980	Nfic	10	80882820	80883644	624	+	43	0.701607	0.637821	1	0	0.636578	0.327479	0.36728	Oocyte-methylated
CGI1981	Nfic	10	80888834	80890587	1553	+	81	0.526604	0.631681	0.333333	0	0.037037	0.0663841	0.0480226
CGI1982		10	80892108	80894607	2299	+	198	0.757233	0.674641	0.0692641	0	0.0360787	0.0170478	0.0396011
CGI1983		10	80895211	80896162	751	+	33	0.527552	0.577896	0.0499022	0.134318	0.0357143	0.0173525	0.241993
CGI1984		10	80896255	80897074	619	+	25	0.439593	0.612278	0.130043	0.00265871	0.0511589	0.0325248	0.610215
CGI1985		10	80914988	80916221	1033	+	51	0.532732	0.610842	0	0	0.0608974	0.0341535	0.0988519
CGI1986		10	80918092	80918602	310	+	14	0.427874	0.651613	0.0946712	0	0.325	0.143292	0.327009
CGI1987	Celf5	10	80922095	80922554	259	+	18	1.09143	0.505792	0.943478		0.0769544	0.269859	0.537879	Oocyte-methylated, gDMR
CGI1988	Celf5	10	80923132	80923534	202	+	11	0.692635	0.564356	1		0.0961538	0.308328	0.438596	Oocyte-methylated, gDMR
CGI1989	Celf5	10	80926782	80927630	648	+	41	0.590001	0.677469	0	0	0.0238095	0.013305	0.105659
CGI1990	Celf5	10	80933208	80933720	312	+	21	0.619633	0.685897	0.0786713	0	0.0459866	0.14812	0.225495
CGI1991	Celf5	10	80935814	80936257	243	+	14	0.542231	0.679012	0	0.0314685	0.0989583	0.00833333	0.123077
CGI1992	Celf5	10	80944441	80945946	1305	+	73	0.564986	0.651341	0	0	0.0604221	0.0124759	0.0625772
CGI1993	Ncln	10	80958145	80959502	1157	+	79	0.711812	0.627485	0.033585	0	0.0431989	0.0208556	0.0244371
CGI1994	S1pr4	10	80961165	80962471	1106	+	53	0.482175	0.631103	0.0338854	0	0.820073	0.139258	0.383968	Sperm-methylated, gDMR
CGI1995	Gna15	10	80965338	80966301	763	+	46	0.632634	0.618611	0.0243291	0.0594582	0.106061	0.0372248	0.199339
CGI1996	Gna15	10	80974970	80975412	242	+	13	0.65595	0.586777	0.0833333	0	0.0509259	0.109037	0.168371
CGI1997		10	80989420	80989984	364	+	14	0.455278	0.587912	0.0222222		0.514652	0.102225	0.277494
CGI1998	Gna11	10	81006586	81008606	1820	+	157	0.826407	0.646703	0.0661588	0.00888889	0.0586611	0.0245494	0.0572301
CGI1999	Aes	10	81021677	81023440	1563	+	93	0.549664	0.677543	0.027027	0	0.0920094	0.0228034	0.0189601
CGI2000		10	81033453	81033952	299	+	25	0.813811	0.668896	0.0204945	0	0	0.082091	0
[truncated: 21,023 more rows]
